# Supplementary material
Source: Royal Society of Chemistry journal article supplement (doi:10.1039/d6gc01193d)

## Supporting Information

### Organocatalytic electrochemical synthesis of $\alpha$ -quaternary amino aldehydes

Jun Tan,<sup>a</sup> Yueyue Fan,<sup>a</sup> Youai Qiu,<sup>b</sup> and Dengke Ma<sup>\*a</sup>

<sup>a</sup> School of Pharmaceutical Sciences, Capital Medical University, Beijing 100069, China.

Email: [madk@ccmu.edu.cn](mailto:madk@ccmu.edu.cn)

<sup>b</sup> State Key Laboratory and Institute of Elemento-Organic Chemistry, Frontiers Science Center for New Organic Matter, Haihe Laboratory of Sustainable Chemical Transformations, College of Chemistry, Nankai University, Tianjin 300071, China.

#### Table of Contents

|                                                            |    |
|------------------------------------------------------------|----|
| I. General Information .....                               | 2  |
| II. Optimization of the reaction conditions.....           | 3  |
| III. Products Purification and Characterization Data ..... | 7  |
| IV. Gram scale reaction and product Derivatizations.....   | 37 |
| V. Mechanistic Studies .....                               | 45 |
| VI. NMR Spectra.....                                       | 55 |

## I. General Information

Electroreductive reactions were carried out in undivided electrochemical cells (10 mL) using pre-dried glassware, if not noted otherwise. Platinum electrodes (10 mm × 15 mm × 0.20 mm, 99.9%; obtained from Chuxi, Shanghai, China) were connected using stainless steel adapters. Electroreduction was conducted using an HSPY-36-03 potentiostat in constant current mode. Cyclic Voltammetry studies were performed using a Shanghai Chenhua CHI630E workstation and Nova 2.0 software. Flash column chromatography was performed over silica gel (200-300 mesh) purchased from Qindao Haiyang Chemical Co., China. Anhydrous tetrahydrofuran were purchased from Energy Chemical or Adamas. Reagents were purchased at the highest commercial quality and used without further purification, unless otherwise stated. <sup>1</sup>H and <sup>13</sup>C spectra were collected on a Bruker AV 300 MHz, 400 MHz or 800 MHz NMR spectrometer using residue solvent peaks as an internal standard (<sup>1</sup>H NMR: CDCl<sub>3</sub> at 7.26 ppm, DMSO-*d*<sub>6</sub> at 2.50 ppm, Acetone-*d*<sub>6</sub> at 2.09 ppm; <sup>13</sup>C NMR: CDCl<sub>3</sub> at 77.0 ppm, DMSO-*d*<sub>6</sub> at 39.5 ppm, Acetone-*d*<sub>6</sub> at 30.6 ppm). High resolution mass spectrometric data were obtained on Waters G2-XS QTOF UPLC/MS spectrometer (ESI-TOF), AB\_Triple TOF 5600 UPLC/MS spectrometer (ESI-TOF), and FTICR-mass spectrometer.

## II. Optimization of the reaction conditions

Table S1. Optimization of aminocatalyst.<sup>[a]</sup>

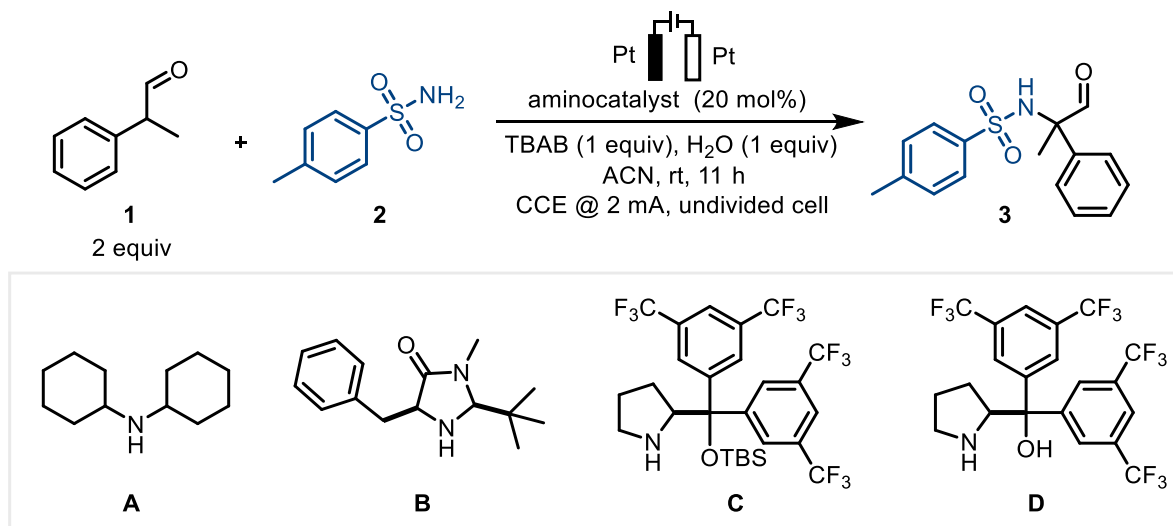

| Entry    | Aminocatalyst | Yield of <b>3</b> (%) <sup>[b]</sup> | Recovery of <b>2</b> (%) <sup>[b]</sup> |
|----------|---------------|--------------------------------------|-----------------------------------------|
| 1        | <b>A</b>      | 58                                   | 4                                       |
| <b>2</b> | <b>B</b>      | <b>82</b>                            | <b>0</b>                                |
| 3        | <b>C</b>      | 14                                   | 25                                      |
| 4        | <b>D</b>      | 40                                   | 21                                      |

[a] Reaction conditions: undivided cell, 2-phenylpropanal **1** (0.4 mmol), *p*-toluenesulfonamide **2** (0.2 mmol), TBAB (0.2 mmol), H<sub>2</sub>O (0.2 mmol), and racemic aminocatalyst (0.04 mmol) were stirred in ACN (2 mL) under 2 mA constant current in argon atmosphere at room temperature for 11 h with platinum plates (each 1.0 × 1.5 cm<sup>2</sup>) as anode and cathode. [b] NMR yield determined by NMR using mesitylene as the internal standard.

**Table S2. Optimization of the solvent.**<sup>[a]</sup>

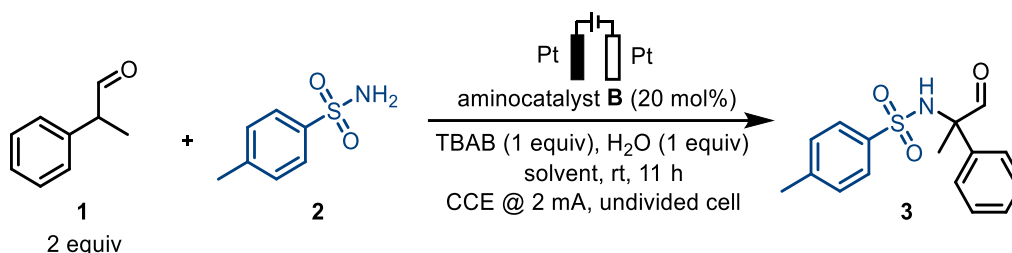

| Entry    | Solvent    | Yield of <b>3</b> (%) <sup>[b]</sup> | Recovery of <b>2</b> (%) <sup>[b]</sup> |
|----------|------------|--------------------------------------|-----------------------------------------|
| <b>1</b> | <b>ACN</b> | <b>82</b>                            | <b>0</b>                                |
| 2        | DCM        | 70                                   | 5                                       |
| 3        | THF        | 64                                   | 24                                      |
| 4        | DMSO       | 15                                   | 50                                      |
| 5        | DMF        | 21                                   | 67                                      |
| 6        | DCE        | 46                                   | 0                                       |

[a] Reaction conditions: undivided cell, 2-phenylpropanal **1** (0.4 mmol), *p*-toluenesulfonamide **2** (0.2 mmol), TBAB (0.2 mmol), H<sub>2</sub>O (0.2 mmol), and racemic aminocatalyst **B** (0.04 mmol) were stirred in solvent (2 mL) under 2 mA constant current in argon atmosphere at room temperature for 11 h with platinum plates (each 1.0 × 1.5 cm<sup>2</sup>) as anode and cathode. [b] NMR yield determined by NMR using mesitylene as the internal standard.

**Table S3. Further optimization.**<sup>[a]</sup>

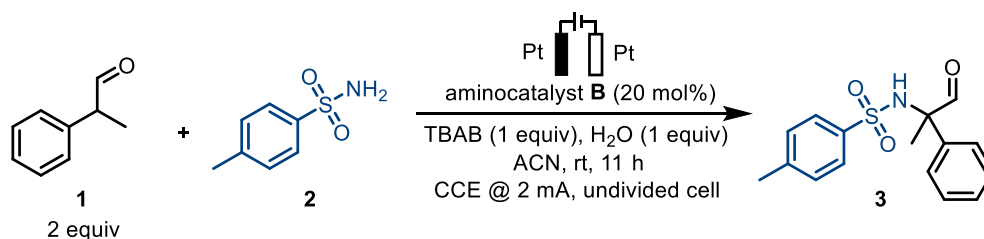

| Entry | Variation from the standard conditions                  | Yield of <b>3</b> (%) <sup>[b]</sup> | Recovery of <b>2</b> (%) <sup>[b]</sup> |
|-------|---------------------------------------------------------|--------------------------------------|-----------------------------------------|
| 1     | -                                                       | <b>82</b>                            | 0                                       |
| 2     | No electricity                                          | 0                                    | 94                                      |
| 3     | No Catalyst                                             | 40                                   | 50                                      |
| 4     | No H <sub>2</sub> O                                     | 35                                   | 23                                      |
| 5     | Ferrocene as mediator                                   | 0                                    | 50                                      |
| 6     | TEMPO as mediator                                       | 36                                   | 27                                      |
| 7     | GF as anode                                             | 3                                    | 70                                      |
| 8     | CF as anode                                             | 1                                    | 58                                      |
| 9     | Cu as anode                                             | 0                                    | 81                                      |
| 10    | Pb as cathode                                           | 5                                    | 91                                      |
| 11    | TEAB as electrolyte                                     | 67                                   | 29                                      |
| 12    | TBAP as electrolyte                                     | 0                                    | 98                                      |
| 13    | TBAI as electrolyte                                     | 28                                   | 37                                      |
| 14    | <i>n</i> Bu <sub>4</sub> PF <sub>6</sub> as electrolyte | 0                                    | 99                                      |
| 15    | TBABF <sub>4</sub> as electrolyte                       | 0                                    | 95                                      |
| 16    | 1 mA (12 h)                                             | 17                                   | 75                                      |
| 17    | 3 mA (8 h)                                              | 51                                   | 33                                      |

[a] Reaction conditions: undivided cell, 2-phenylpropanal **1** (0.4 mmol), *p*-toluenesulfonamide **2** (0.2 mmol), TBAB (0.2 mmol), H<sub>2</sub>O (0.2 mmol), and racemic aminocatalyst **B** (0.04 mmol) were stirred in ACN (2 mL) under 2 mA constant current in argon atmosphere at room temperature for 11 h with platinum plates (each 1.0 × 1.5 cm<sup>2</sup>) as anode and cathode. [b] NMR yield determined by NMR using mesitylene as the internal standard.

**Table S4. Optimization for  $\alpha,\alpha$ -dialkyl substituted aldehydes.<sup>[a]</sup>**

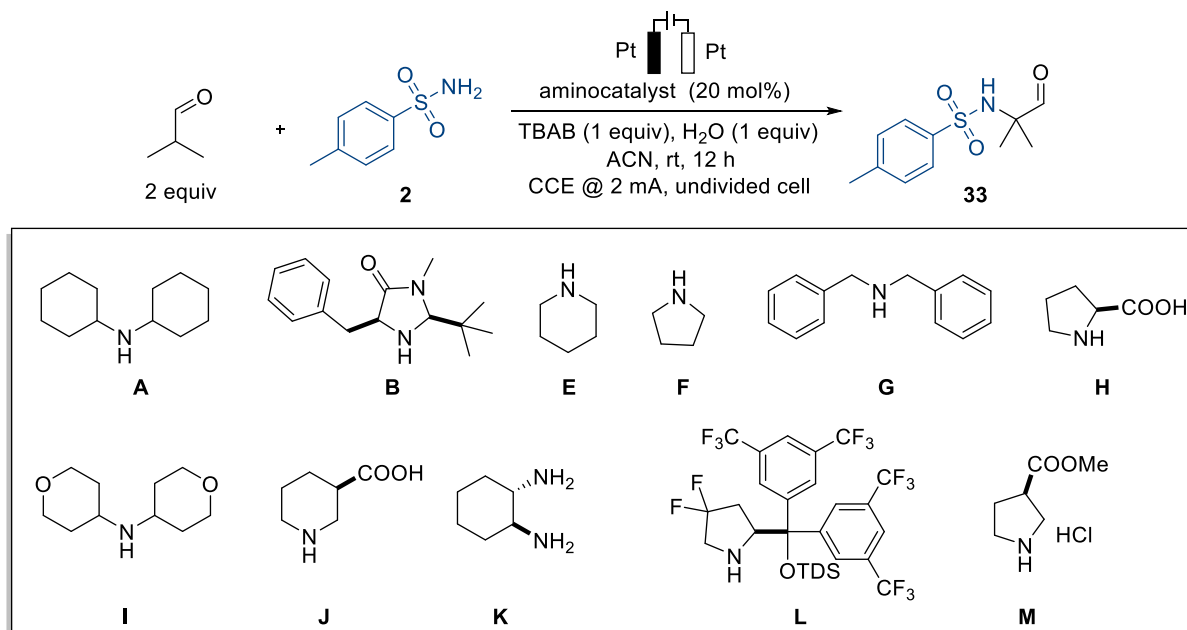

| Entry     | Aminocatalyst      | Concentration (mol/L) | Yield of <b>33</b> (%) <sup>[b]</sup> | Recovery of <b>2</b> (%) <sup>[b]</sup> |
|-----------|--------------------|-----------------------|---------------------------------------|-----------------------------------------|
| 1         | <b>A</b>           | 0.05                  | 56                                    | 13                                      |
| 2         | <b>E</b>           | 0.05                  | 6                                     | 48                                      |
| 3         | <b>F</b>           | 0.05                  | 8                                     | 42                                      |
| 4         | <b>G</b>           | 0.05                  | 5                                     | 55                                      |
| 5         | <b>A</b>           | 0.1                   | 59                                    | 3                                       |
| 6         | <b>B</b>           | 0.1                   | 6                                     | 90                                      |
| 7         | <b>H</b>           | 0.1                   | 17                                    | 45                                      |
| 8         | <b>I</b>           | 0.1                   | 56                                    | 5                                       |
| 9         | <b>J</b>           | 0.1                   | 42                                    | 38                                      |
| 10        | <b>K</b>           | 0.1                   | 36                                    | 31                                      |
| 11        | <b>L</b>           | 0.1                   | 6                                     | 50                                      |
| 12        | <b>M</b>           | 0.1                   | 6                                     | 40                                      |
| <b>13</b> | <b>A (30 mol%)</b> | <b>0.1</b>            | <b>70</b>                             | <b>0</b>                                |
| 14        | -                  | 0.1                   | 13                                    | 51                                      |

[a] Reaction conditions: undivided cell, isobutyraldehyde (0.4 mmol), *p*-toluenesulfonamide **2** (0.2 mmol), TBAB (0.2 mmol), H<sub>2</sub>O (0.2 mmol), and racemic aminocatalyst (0.04 mmol) were stirred in ACN (2 or 4 mL) under 2 mA constant current in argon atmosphere at room temperature for 12 h with platinum plates (each 1.0 × 1.5 cm<sup>2</sup>) as anode and cathode. [b] NMR yield determined by NMR using mesitylene as the internal standard.

### III. Products Purification and Characterization Data

#### General Procedure I.

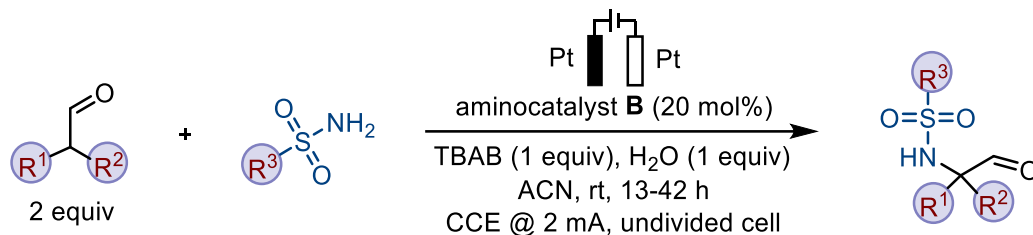

The electrocatalysis was carried out in an undivided cell with a platinum plate anode (10.0 mm × 15.0 mm × 0.2 mm) and a platinum plate cathode (10.0 mm × 15.0 mm × 0.2 mm). Under argon, to a 10 mL pre-dried undivided electrochemical cell equipped with a magnetic bar were added sulfonamide (0.4 mmol, 1.0 equiv), racemic aminocatalyst **B** (19.7 mg, 0.08 mmol, 0.2 equiv), tetrabutylammonium bromide (128.9 mg, 0.4 mmol, 1.0 equiv). Then H<sub>2</sub>O (0.4 mmol, 1.0 equiv, 7.2 uL), aldehyde (0.8 mmol, 2.0 equiv), and ACN (4 mL) were added. The electrocatalysis was performed at room temperature with a constant current of 2.0 mA maintained for 13-42 h. After the reaction was completed, the solution was concentrated and purified by silica gel flash column chromatography to afford the pure product.

#### General Procedure II.

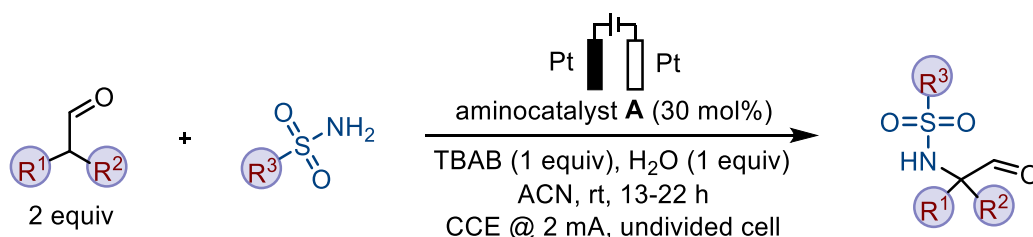

The electrocatalysis was carried out in an undivided cell with a platinum plate anode (10.0 mm × 15.0 mm × 0.2 mm) and a platinum plate cathode (10.0 mm × 15.0 mm × 0.2 mm). Under argon, to a 10 mL pre-dried undivided electrochemical cell equipped with a magnetic bar were added sulfonamide (0.4 mmol, 1.0 equiv), aminocatalyst **A** (24.0 μL, 0.12 mmol, 0.3 equiv, d = 0.912 g/mL), tetrabutylammonium bromide (128.9 mg, 0.4 mmol, 1.0 equiv). Then H<sub>2</sub>O (0.4 mmol, 1.0 equiv, 7.2 uL), aldehyde (0.8 mmol,

2.0 equiv), and ACN (4 mL) were added. The electrocatalysis was performed at room temperature with a constant current of 2.0 mA maintained for 13-22 h. After the reaction was completed, the solution was concentrated and purified by silica gel flash column chromatography to afford the pure product.

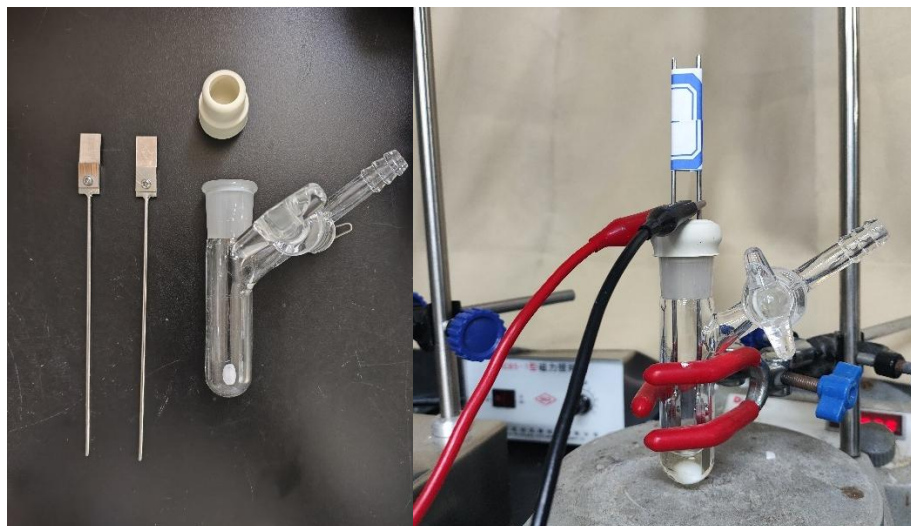

Figure S1. Electrolysis set-up.

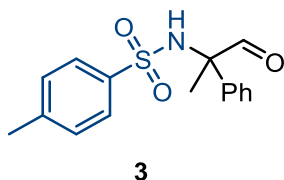

**4-Methyl-N-(1-oxo-2-phenylpropan-2-yl)benzenesulfonamide (3)** was prepared as a white solid from 4-methylbenzenesulfonamide **2** (69.0 mg, 0.4 mmol, 1.0 equiv), 2-phenylpropanal **1** (107.0 uL, 0.8 mmol, 2.0 equiv,  $d = 1.002 \text{ g/mL}$ ), aminocatalyst **B** (19.9 mg, 0.08 mmol, 0.2 equiv), TBAB (129.0 mg, 0.4 mmol, 1.0 equiv), and  $\text{H}_2\text{O}$  (7.2 uL, 0.4 mmol, 1.0 equiv,  $d = 1.000 \text{ g/mL}$ ) in ACN (4 mL) according to the General Procedure I (22 h, purified by flash column chromatography, eluent: *n*-hexane/ethyl acetate = 9/1, 103.7 mg, 85% yield). The NMR data are in consistent with the reported

literature.<sup>[1]</sup>

<sup>1</sup>H NMR (300 MHz, CDCl<sub>3</sub>) δ 9.14 (s, 1H), 7.36 (d, *J* = 8.2 Hz, 2H), 7.25-7.10 (m, 5H), 7.05 (d, *J* = 8.1 Hz, 2H), 6.03 (s, 1H), 2.34 (s, 3H), 1.87 (s, 3H) ppm.

<sup>13</sup>C NMR (75 MHz, CDCl<sub>3</sub>) δ 194.3, 142.7, 139.0, 134.0, 129.1, 128.7, 128.5, 127.4, 126.5, 66.7, 21.3, 19.9 ppm.

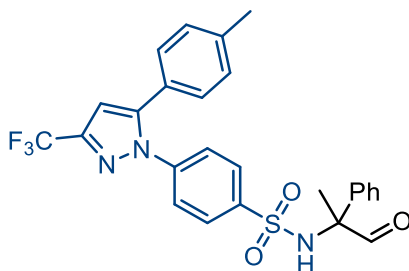

4

***N*-(1-Oxo-2-phenylpropan-2-yl)-4-(5-(*p*-tolyl)-3-(trifluoromethyl)-1*H*-pyrazol-1-yl)benzenesulfonamide (4)** was prepared as a white solid from Celecoxib (153.0 mg, 0.4 mmol, 1.0 equiv), 2-phenylpropanal **1** (107.0 uL, 0.8 mmol, 2.0 equiv, *d* = 1.002 g/mL), aminocatalyst **B** (19.9 mg, 0.08 mmol, 0.2 equiv), TBAB (130.0 mg, 0.4 mmol, 1.0 equiv), and H<sub>2</sub>O (7.2 uL, 0.4 mmol, 1.0 equiv, *d* = 1.000 g/mL) in ACN (4 mL) according to the General Procedure I (constant current of 3.0 mA, 42 h, purified by flash column chromatography, eluent: *n*-hexane/ethyl acetate = 10/1 to 5/1, 174.6 mg, 85% yield).

<sup>1</sup>H NMR (300 MHz, CDCl<sub>3</sub>) δ 9.11 (s, 1H), 7.40 (d, *J* = 8.6 Hz, 2H), 7.27-7.13 (m, 7H), 7.14-7.02 (m, 4H), 6.72 (s, 1H), 6.17 (s, 1H), 2.37 (s, 3H), 1.90 (s, 3H) ppm.

<sup>13</sup>C NMR (75 MHz, CDCl<sub>3</sub>) δ 194.0, 145.0, 143.8 (q, *J* = 38.3 Hz), 141.8, 141.3, 139.7, 133.5, 129.6, 129.0, 128.9, 128.6, 127.6, 127.5, 125.7, 124.9, 121.6 (q, *J* = 267.0 Hz), 106.2, 66.8, 21.2, 19.9 ppm.

---

[1] H. Vogt, T. Baumann, M. Nieger and S. Bräse, *Eur. J. Org. Chem.*, 2006, **23**, 5315–5338.

$^{19}\text{F}$  NMR (376 MHz,  $\text{CDCl}_3$ )  $\delta$  -62.4 ppm.

HRMS (ESI)  $m/z$  Calcd for  $\text{C}_{26}\text{H}_{23}\text{F}_3\text{N}_3\text{O}_3\text{S}$  [ $\text{M}^+\text{H}$ ]: 514.1407, Found: 514.1408.

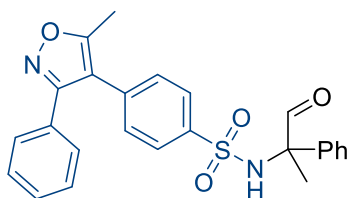

5

**4-(5-Methyl-3-phenylisoxazol-4-yl)-N-(1-oxo-2-phenylpropan-2-**

**yl)benzenesulfonamide (5)** was prepared as a white solid from Valdecoxib (126.0 mg, 0.4 mmol, 1.0 equiv), 2-phenylpropanal **1** (107.0  $\mu\text{L}$ , 0.8 mmol, 2.0 equiv,  $d = 1.002$  g/mL), aminocatalyst **B** (19.9 mg, 0.08 mmol, 0.2 equiv), TBAB (130.0 mg, 0.4 mmol, 1.0 equiv), and  $\text{H}_2\text{O}$  (7.2  $\mu\text{L}$ , 0.4 mmol, 1.0 equiv,  $d = 1.000$  g/mL) in ACN (4 mL) according to the General Procedure I (constant current of 3.0 mA, 22 h, purified by flash column chromatography, eluent: *n*-hexane/ethyl acetate = 10/1 to 6/1, 170.8 mg, 84% yield).

$^1\text{H}$  NMR (300 MHz,  $\text{CDCl}_3$ )  $\delta$  9.14 (s, 1H), 7.46-7.29 (m, 7H), 7.21-7.10 (m, 5H), 7.05 (d,  $J = 8.3$  Hz, 2H), 6.21 (s, 1H), 2.45 (s, 3H), 1.94 (s, 3H) ppm.

$^{13}\text{C}$  NMR (75 MHz,  $\text{CDCl}_3$ )  $\delta$  194.1, 167.0, 160.9, 140.9, 134.3, 133.7, 129.6, 128.67, 128.65, 128.6, 128.4, 128.3, 127.7, 126.9, 114.4, 66.7, 20.0, 11.6 ppm.

HRMS (ESI)  $m/z$  Calcd for  $\text{C}_{25}\text{H}_{22}\text{N}_2\text{NaO}_4\text{S}$  [ $\text{M}^+\text{Na}$ ]: 469.1192, Found: 469.1194.

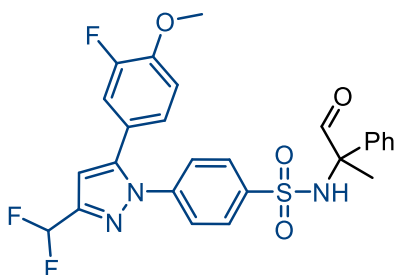

6

**4-(3-(Difluoromethyl)-5-(3-fluoro-4-methoxyphenyl)-1H-pyrazol-1-yl)-N-(1-oxo-2-**

**phenylpropan-2-yl)benzenesulfonamide (6)** was prepared as a white solid from Deracoxib (159.0 mg, 0.4 mmol, 1.0 equiv), 2-phenylpropanal **1** (107.0 uL, 0.8 mmol, 2.0 equiv,  $d = 1.002$  g/mL), aminocatalyst **B** (19.9 mg, 0.08 mmol, 0.2 equiv), TBAB (130.0 mg, 0.4 mmol, 1.0 equiv), and H<sub>2</sub>O (7.2 uL, 0.4 mmol, 1.0 equiv,  $d = 1.000$  g/mL) in ACN (4 mL) according to the General Procedure I (constant current of 3.0 mA, 22 h, purified by flash column chromatography, eluent: *n*-hexane/ethyl acetate = 6/1 to 4/1, 186.3 mg, 86% yield).

<sup>1</sup>H NMR (300 MHz, CDCl<sub>3</sub>)  $\delta$  9.12 (s, 1H), 7.42 (d,  $J = 8.7$  Hz, 2H), 7.26-7.16 (m, 5H), 7.15-7.08 (m, 2H), 6.99-6.84 (m, 3H), 6.76 (t,  $J = 54.8$  Hz, 1H), 6.68 (s, 1H), 6.23 (s, 1H), 3.89 (s, 3H), 1.89 (s, 3H) ppm.

<sup>13</sup>C NMR (75 MHz, CDCl<sub>3</sub>)  $\delta$  194.0, 151.9 (d,  $J = 246.8$  Hz), 148.4 (d,  $J = 9.8$  Hz), 148.0 (t,  $J = 29.6$  Hz), 143.5, 141.8, 141.1, 133.6, 128.9, 128.8, 127.5, 125.0 (d,  $J = 3.0$  Hz), 124.6, 121.6 (d,  $J = 6.8$  Hz), 116.4 (d,  $J = 20.3$  Hz), 113.5 (d,  $J = 1.5$  Hz), 110.9 (t,  $J = 233.3$  Hz), 105.6, 66.7, 56.1, 19.8 ppm.

<sup>19</sup>F NMR (282 MHz, CDCl<sub>3</sub>)  $\delta$  -112.2, -133.4 ppm.

HRMS (ESI)  $m/z$  Calcd for C<sub>26</sub>H<sub>23</sub>F<sub>3</sub>N<sub>3</sub>O<sub>4</sub>S [M<sup>+</sup>+H]: 530.1356, Found: 530.1359.

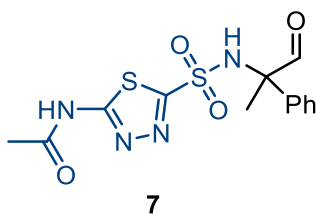

**N-(5-(N-(1-Oxo-2-phenylpropan-2-yl)sulfamoyl)-1,3,4-thiadiazol-2-yl)acetamide (7)** was prepared as a white solid from Acetazolamide (89.0 mg, 0.4 mmol, 1.0 equiv), 2-phenylpropanal **1** (107.0 uL, 0.8 mmol, 2.0 equiv,  $d = 1.002$  g/mL), aminocatalyst **B** (19.7 mg, 0.08 mmol, 0.2 equiv), TBAB (130.0 mg, 0.4 mmol, 1.0 equiv), and H<sub>2</sub>O (7.2 uL, 0.4 mmol, 1.0 equiv,  $d = 1.000$  g/mL) in ACN (4 mL) according to the General Procedure I (constant current of 3.0 mA, 22 h, purified by flash column chromatography, eluent: *n*-hexane/ethyl acetate = 12/1 to 10/1, 72.3 mg, 51% yield).

$^1\text{H NMR}$  (300 MHz, Acetone- $d_6$ )  $\delta$  12.15 (s, 1H), 9.66 (s, 1H), 8.32 (s, 1H), 7.54-7.27 (m, 5H), 2.37 (s, 3H), 1.92 (s, 3H) ppm.

$^{13}\text{C NMR}$  (75 MHz, Acetone- $d_6$ )  $\delta$  196.8, 170.5, 165.5, 163.4, 137.9, 130.4, 130.1, 128.8, 69.6, 23.4, 21.8 ppm.

**HRMS** (ESI)  $m/z$  Calcd for  $\text{C}_{13}\text{H}_{15}\text{N}_4\text{O}_4\text{S}_2$  [ $\text{M}^+\text{H}$ ]: 355.0529, Found: 355.0527.

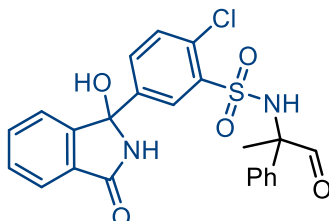

8

**2-Chloro-5-(1-hydroxy-3-oxoisindolin-1-yl)-N-(1-oxo-2-phenylpropan-2-yl)benzenesulfonamide (8)** was prepared as a white solid from Chlortalidone (137.0 mg, 0.4 mmol, 1.0 equiv), 2-phenylpropanal **1** (107.0  $\mu\text{L}$ , 0.8 mmol, 2.0 equiv,  $d = 1.002$  g/mL), aminocatalyst **B** (19.8 mg, 0.08 mmol, 0.2 equiv), TBAB (131.0 mg, 0.4 mmol, 1.0 equiv), and  $\text{H}_2\text{O}$  (7.2  $\mu\text{L}$ , 0.4 mmol, 1.0 equiv,  $d = 1.000$  g/mL) in ACN (4 mL) according to the General Procedure I (constant current of 3.0 mA, 22 h, purified by flash column chromatography, eluent: *n*-hexane/ethyl acetate = 2/1 to 9/7, 177.1 mg, 94% yield, dr: 1/1).

$^1\text{H NMR}$  (300 MHz, DMSO- $d_6$ )  $\delta$  [9.59 (s, 0.45H), 9.53 (s, 0.49H), 1H], 9.36 (d,  $J = 1.4$  Hz, 1H), [8.86 (s, 0.44H), 8.76 (s, 0.46H), 1H], [7.90 (d,  $J = 1.9$  Hz, 0.48H), 7.87 (d,  $J = 2.1$  Hz, 0.5H), 1H], 7.73-7.50 (m, 5H), 7.34-7.04 (m, 7H), [1.59 (s, 1.5H), 1.52 (s, 1.39H), 3H] ppm.

$^{13}\text{C NMR}$  (75 MHz, DMSO- $d_6$ )  $\delta$  197.0, 196.6, 168.34, 168.31, 149.8, 142.0, 141.91, 139.5, 139.4, 136.6, 136.3, 132.7, 131.74, 131.71, 131.2, 131.1, 130.61, 130.56, 129.9, 129.4, 128.4, 128.3, 128.2, 126.8, 126.74, 126.71, 122.81, 122.77, 86.61, 86.60, 67.4, 67.3, 21.14, 21.09 ppm.

**HRMS** (ESI)  $m/z$  Calcd for  $\text{C}_{23}\text{H}_{19}\text{ClN}_2\text{NaO}_5\text{S}$  [ $\text{M}^+\text{Na}$ ]: 493.0595, Found: 493.0599.

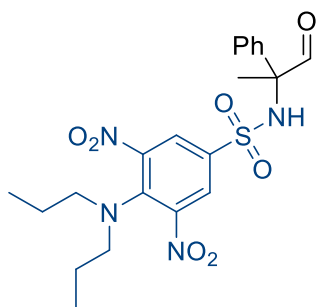

9

**4-(Dipropylamino)-3,5-dinitro-*N*-(1-oxo-2-phenylpropan-2-yl)benzenesulfonamide**

(9) was prepared as a reddish-brown solid from Oryzalin (139.0 mg, 0.4 mmol, 1.0 equiv), 2-phenylpropanal **1** (107.0 uL, 0.8 mmol, 2.0 equiv,  $d = 1.002$  g/mL), aminocatalyst **B** (19.6 mg, 0.08 mmol, 0.2 equiv), TBAB (129.0 mg, 0.4 mmol, 1.0 equiv), and H<sub>2</sub>O (7.2 uL, 0.4 mmol, 1.0 equiv,  $d = 1.000$  g/mL) in ACN (4 mL) according to the General Procedure I (constant current of 3.0 mA, 36 h, purified by flash column chromatography, eluent: *n*-hexane/ethyl acetate = 9/1, 102.0 mg, 53% yield).

<sup>1</sup>H NMR (300 MHz, CDCl<sub>3</sub>)  $\delta$  9.08 (s, 1H), 7.60 (s, 2H), 7.22-7.13 (m, 3H), 7.10-7.01 (m, 2H), 6.34 (s, 1H), 2.97 (dt,  $J_1 = 14.3$  Hz,  $J_2 = 7.1$  Hz, 2H), 2.81 (dt,  $J_1 = 13.7$  Hz,  $J_2 = 7.4$  Hz, 2H), 2.04 (s, 3H), 1.58 (h,  $J = 7.3$  Hz, 4H), 0.90 (t,  $J = 7.4$  Hz, 6H) ppm.

<sup>13</sup>C NMR (75 MHz, CDCl<sub>3</sub>)  $\delta$  193.4, 144.0, 140.8, 131.9, 131.8, 129.4, 128.8, 128.2, 128.1, 66.4, 54.0, 20.7, 19.8, 11.2 ppm.

HRMS (ESI)  $m/z$  Calcd for C<sub>21</sub>H<sub>27</sub>N<sub>4</sub>O<sub>7</sub>S [M<sup>+</sup>+H]: 479.1595, Found: 479.1597.

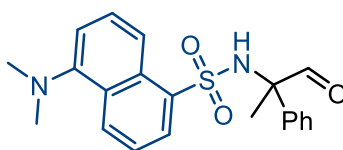

10

**5-(Dimethylamino)-*N*-(1-oxo-2-phenylpropan-2-yl)naphthalene-1-sulfonamide** (10)

was prepared as a yellow solid from Dansylamide (100.1 mg, 0.4 mmol, 1.0 equiv), 2-phenylpropanal **1** (107.0 uL, 0.8 mmol, 2.0 equiv,  $d = 1.002$  g/mL), aminocatalyst **B** (19.9 mg, 0.08 mmol, 0.2 equiv), TBAB (129.1 mg, 0.4 mmol, 1.0 equiv), and H<sub>2</sub>O (7.2

uL, 0.4 mmol, 1.0 equiv,  $d = 1.000$  g/mL) in ACN (4 mL) according to the General Procedure I (constant current of 5.0 mA, 13 h, purified by flash column chromatography, eluent: *n*-hexane/ethyl acetate = 12/1 to 10/1, 107.4 mg, 70% yield).

$^1\text{H NMR}$  (300 MHz,  $\text{CDCl}_3$ )  $\delta$  9.04 (s, 1H), 8.32 (d,  $J = 8.5$  Hz, 1H), 8.20 (d,  $J = 8.6$  Hz, 1H), 7.65-7.55 (m, 2H), 7.19-6.99 (m, 3H), 6.94-6.80 (m, 4H), 6.26 (s, 1H), 2.86 (s, 6H), 1.88 (s, 3H) ppm.

$^{13}\text{C NMR}$  (75 MHz,  $\text{CDCl}_3$ )  $\delta$  194.1, 151.8, 136.5, 133.0, 129.7, 129.4, 129.0, 128.8, 128.5, 128.4, 128.2, 127.2, 123.0, 118.4, 114.9, 66.7, 45.3, 19.9 ppm.

HRMS (ESI)  $m/z$  Calcd for  $\text{C}_{21}\text{H}_{23}\text{N}_2\text{O}_3\text{S}$  [ $\text{M}^+\text{H}$ ]: 383.1424, Found: 383.1424.

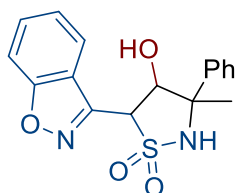

11

**5-(Benzo[*d*]isoxazol-3-yl)-4-hydroxy-3-methyl-3-phenylisothiazolidine 1,1-dioxide (11)** was prepared as a white solid from Zonisamide (85.0 mg, 0.4 mmol, 1.0 equiv), 2-phenylpropanal **1** (107.0 uL, 0.8 mmol, 2.0 equiv,  $d = 1.002$  g/mL), aminocatalyst **B** (19.9 mg, 0.08 mmol, 0.2 equiv), TBAB (130.0 mg, 0.4 mmol, 1.0 equiv), and  $\text{H}_2\text{O}$  (7.2 uL, 0.4 mmol, 1.0 equiv,  $d = 1.000$  g/mL) in ACN (4 mL) according to the General Procedure I (constant current of 3.0 mA, 42 h, purified by flash column chromatography, eluent: *n*-hexane/ethyl acetate = 7/1 to 5/1, 102.0 mg, 87% yield, dr: 11.5/1).

$^1\text{H NMR}$  (300 MHz, Acetone- $d_6$ )  $\delta$  [8.22 (d,  $J = 8.2$  Hz, 0.08H), 7.98 (d,  $J = 8.0$  Hz, 0.92H), 1H], 7.82-7.60 (m, 4H), 7.47-7.22 (m, 5H), [5.78 (d,  $J = 6.3$  Hz, 0.84H), 5.62 (d,  $J = 5.0$  Hz, 0.07H), 1H], 5.37 (dd,  $J_1 = 10.6$  Hz,  $J_2 = 6.2$  Hz, 1H), [5.25 (d,  $J = 10.6$  Hz, 1H), 4.83 (d,  $J = 3.9$  Hz, 0.07H), 1H], [1.92 (s, 2.73H), 1.78 (s, 0.23H), 3H] ppm.

$^{13}\text{C NMR}$  (75 MHz, Acetone- $d_6$ )  $\delta$  165.4, 152.2, 147.3, 132.2, 129.9, 128.9, 126.9, 125.6, 124.5, 122.4, 111.4, 79.2, 66.3, 62.8, 24.2 ppm. (only major isomer was reported)

HRMS (ESI)  $m/z$  Calcd for  $C_{17}H_{17}N_2O_4S$  [ $M^+ + H$ ]: 345.0904, Found: 345.0904.

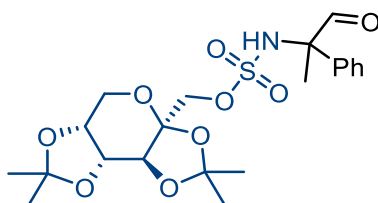

12

**((3a*S*,5a*R*,8a*R*,8b*S*)-2,2,7,7-Tetramethyltetrahydro-3a*H*-bis([1,3]dioxolo)[4,5-*b*:4',5'-*d*]pyran-3a-yl)methyl (1-oxo-2-phenylpropan-2-yl)sulfamate (12)** was prepared as a colorless oil from Topiramate (136.0 mg, 0.4 mmol, 1.0 equiv), 2-phenylpropanal **1** (107.0  $\mu$ L, 0.8 mmol, 2.0 equiv,  $d = 1.002$  g/mL), aminocatalyst **B** (19.9 mg, 0.08 mmol, 0.2 equiv), TBAB (130.0 mg, 0.4 mmol, 1.0 equiv), and  $H_2O$  (7.2  $\mu$ L, 0.4 mmol, 1.0 equiv,  $d = 1.000$  g/mL) in ACN (4 mL) according to the General Procedure I (constant current of 3.0 mA, 22 h, purified by flash column chromatography, eluent: *n*-hexane/ethyl acetate = 9/1 to 6/1, 97.0 mg, 51% yield, dr: about 1/1).

$^1H$  NMR (300 MHz,  $CDCl_3$ )  $\delta$  9.22 (s, 1H), 7.48-7.32 (m, 5H), 6.20 (s, 1H), 4.63-4.55 (m, 1H), 4.25-4.04 (m, 4H), 3.93-3.82 (m, 1H), 3.74 (dd,  $J_1 = 13.0$  Hz,  $J_2 = 7.0$  Hz, 1H), 1.98 (s, 3H), [1.53 (s, 1.52H), 1.52 (s, 1.44H), 3H], 1.45 (s, 3H), 1.37-1.30 (m, 6H) ppm.

$^{13}C$  NMR (75 MHz,  $CDCl_3$ )  $\delta$  194.1, 135.5, 129.2, 128.9, 126.94, 126.91, 109.2, 109.13, 109.11, 100.7, 70.7, 70.6, 70.5, 70.4, 70.2, 70.1, 69.8, 67.2, 67.1, 61.3, 61.2, 26.4, 26.3, 25.80, 25.76, 25.1, 25.0, 24.00, 23.97, 18.8, 18.7 ppm.

HRMS (ESI)  $m/z$  Calcd for  $C_{21}H_{29}NNaO_9S$  [ $M^+ + Na$ ]: 494.1455, Found: 494.1456.

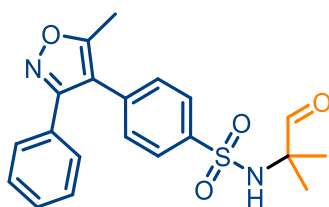

13

***N*-(2-Methyl-1-oxopropan-2-yl)-4-(5-methyl-3-phenylisoxazol-4-**

yl)benzenesulfonamide (**13**) was prepared as a white solid from Valdecoxib (127.0 mg, 0.4 mmol, 1.0 equiv), isobutyraldehyde (57.7 mg, 0.8 mmol, 2.0 equiv), aminocatalyst **A** (24.0  $\mu$ L, 0.12 mmol, 0.3 equiv,  $d = 0.912$  g/mL), TBAB (129.3 mg, 0.4 mmol, 1.0 equiv), and H<sub>2</sub>O (7.2  $\mu$ L, 0.4 mmol, 1.0 equiv,  $d = 1.000$  g/mL) in ACN (4 mL) according to the General Procedure II (22 h, purified by flash column chromatography, eluent: *n*-hexane/ethyl acetate = 6/1 to 4/1, 108.5 mg, 71% yield).

<sup>1</sup>H NMR (300 MHz, CDCl<sub>3</sub>)  $\delta$  9.46 (s, 1H), 7.88 (d,  $J = 8.2$  Hz, 2H), 7.44-7.25 (m, 7H), 5.85 (s, 1H), 2.48 (s, 3H), 1.31 (s, 6H) ppm.

<sup>13</sup>C NMR (75 MHz, CDCl<sub>3</sub>)  $\delta$  199.3, 167.2, 161.0, 141.5, 135.1, 130.2, 129.7, 128.6, 128.4, 127.2, 114.4, 62.4, 22.3, 11.6 ppm.

HRMS (ESI)  $m/z$  Calcd for C<sub>20</sub>H<sub>21</sub>N<sub>2</sub>O<sub>4</sub>S [M<sup>+</sup>+H]: 385.1217, Found: 385.1217.

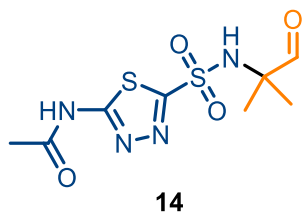

**N-(5-(N-(2-Methyl-1-oxopropan-2-yl)sulfamoyl)-1,3,4-thiadiazol-2-yl)acetamide (14)** was prepared as a white solid from Acetazolamide (88.9 mg, 0.4 mmol, 1.0 equiv), isobutyraldehyde (57.7 mg, 0.8 mmol, 2.0 equiv), aminocatalyst **A** (24.0  $\mu$ L, 0.12 mmol, 0.3 equiv,  $d = 0.912$  g/mL), TBAB (129.1 mg, 0.4 mmol, 1.0 equiv), and H<sub>2</sub>O (7.2  $\mu$ L, 0.4 mmol, 1.0 equiv,  $d = 1.000$  g/mL) in ACN (4 mL) according to the General Procedure II (15 h, purified by flash column chromatography, eluent: *n*-hexane/ethyl acetate = 2/1 to 1/1, 79.1 mg, 68% yield).

<sup>1</sup>H NMR (300 MHz, Acetone-*d*<sub>6</sub>)  $\delta$  11.96 (s, 1H), 9.62 (s, 1H), 8.01 (s, 1H), 2.38 (s, 3H), 1.37 (s, 6H) ppm.

<sup>13</sup>C NMR (75 MHz, Acetone-*d*<sub>6</sub>)  $\delta$  201.0, 170.6, 165.7, 163.2, 64.7, 23.39, 23.35 ppm.

HRMS (ESI)  $m/z$  Calcd for C<sub>8</sub>H<sub>13</sub>N<sub>4</sub>O<sub>4</sub>S<sub>2</sub> [M<sup>+</sup>+H]: 293.0373, Found: 293.0376.

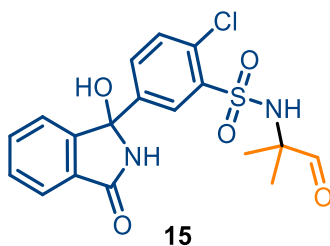

**2-Chloro-5-(1-hydroxy-3-oxoisindolin-1-yl)-N-(2-methyl-1-oxopropan-2-yl)benzenesulfonamide (15)** was prepared as a white solid from Chlortalidone (136.0 mg, 0.4 mmol, 1.0 equiv), isobutyraldehyde (57.7 mg, 0.8 mmol, 2.0 equiv), aminocatalyst **A** (24.0  $\mu$ L, 0.12 mmol, 0.3 equiv,  $d = 0.912$  g/mL), TBAB (129.9 mg, 0.4 mmol, 1.0 equiv), and H<sub>2</sub>O (7.2  $\mu$ L, 0.4 mmol, 1.0 equiv,  $d = 1.000$  g/mL) in ACN (4 mL) according to the General Procedure II (17 h, purified by flash column chromatography, eluent: *n*-hexane/ethyl acetate = 2/1 to 1/1, 132.1 mg, 81% yield).

<sup>1</sup>H NMR (300 MHz, DMSO-*d*<sub>6</sub>)  $\delta$  9.47 (s, 2H), 8.70 (s, 1H), 8.09 (s, 1H), 7.75-7.62 (m, 3H), 7.61-7.47 (m, 2H), 7.38-7.23 (m, 2H), 1.05 (s, 6H) ppm.

<sup>13</sup>C NMR (75 MHz, DMSO-*d*<sub>6</sub>)  $\delta$  200.7, 168.4, 150.0, 142.2, 140.1, 132.8, 132.0, 131.1, 130.6, 130.0, 129.5, 126.9, 122.9, 122.6, 86.6, 61.9, 21.8, 21.6 ppm.

HRMS (ESI)  $m/z$  Calcd for C<sub>18</sub>H<sub>17</sub>ClN<sub>2</sub>NaO<sub>5</sub>S [M<sup>+</sup>+Na]: 431.0439, Found: 431.0440.

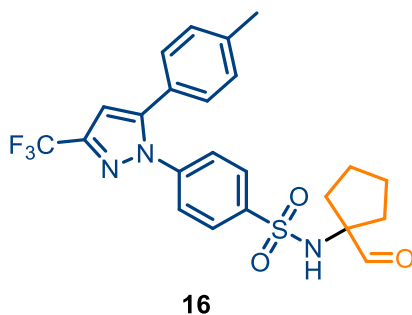

**N-(1-Formylcyclopentyl)-4-(5-(*p*-tolyl)-3-(trifluoromethyl)-1H-pyrazol-1-yl)benzenesulfonamide (16)** was prepared as a white solid from Celecoxib (153.0 mg, 0.4 mmol, 1.0 equiv), cyclopentanecarbaldehyde (78.5 mg, 0.8 mmol, 2.0 equiv), aminocatalyst **A** (24.0  $\mu$ L, 0.12 mmol, 0.3 equiv,  $d = 0.912$  g/mL), TBAB (129.0 mg, 0.4 mmol, 1.0 equiv), and H<sub>2</sub>O (7.2  $\mu$ L, 0.4 mmol, 1.0 equiv,  $d = 1.000$  g/mL) in ACN (4 mL)

according to the General Procedure II (16 h, purified by flash column chromatography, eluent: *n*-hexane/ethyl acetate = 12/1 to 9/1, 133.0 mg, 70% yield).

$^1\text{H NMR}$  (300 MHz,  $\text{CDCl}_3$ )  $\delta$  9.58 (s, 1H), 7.88 (d,  $J = 8.5$  Hz, 2H), 7.47 (d,  $J = 8.5$  Hz, 2H), 7.21-7.05 (m, 4H), 6.75 (s, 1H), 5.84 (s, 1H), 2.37 (s, 3H), 2.06-1.90 (m, 2H), 1.78-1.55 (m, 6H) ppm.

$^{13}\text{C NMR}$  (75 MHz,  $\text{CDCl}_3$ )  $\delta$  199.3, 145.3, 144.0 (q,  $J = 38.3$  Hz), 142.4, 141.4, 139.8, 129.7, 128.7, 127.8, 125.6, 125.5, 121.0 (q,  $J = 267.5$  Hz), 106.2, 73.0, 33.9, 23.8, 21.2 ppm.

$^{19}\text{F NMR}$  (376 MHz,  $\text{CDCl}_3$ )  $\delta$  -62.4 ppm.

**HRMS** (ESI)  $m/z$  Calcd for  $\text{C}_{23}\text{H}_{23}\text{F}_3\text{N}_3\text{O}_3\text{S}$  [ $\text{M}^+\text{H}$ ]: 478.1407, Found: 478.1410.

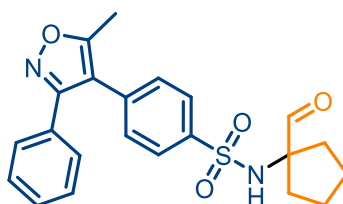

17

***N*-(1-Formylcyclopentyl)-4-(5-methyl-3-phenylisoxazol-4-yl)benzenesulfonamide (17)** was prepared as a white solid from Valdecocixib (126.0 mg, 0.4 mmol, 1.0 equiv), cyclopentanecarbaldehyde (78.5 mg, 0.8 mmol, 2.0 equiv), aminocatalyst A (24.0  $\mu\text{L}$ , 0.12 mmol, 0.3 equiv,  $d = 0.912$  g/mL), TBAB (129.3 mg, 0.4 mmol, 1.0 equiv), and  $\text{H}_2\text{O}$  (7.2  $\mu\text{L}$ , 0.4 mmol, 1.0 equiv,  $d = 1.000$  g/mL) in ACN (4 mL) according to the General Procedure II (16 h, purified by flash column chromatography, eluent: *n*-hexane/ethyl acetate = 9/1 to 4/1, 129.7 mg, 79% yield).

$^1\text{H NMR}$  (300 MHz,  $\text{CDCl}_3$ )  $\delta$  9.64 (s, 1H), 7.89 (d,  $J = 8.1$  Hz, 2H), 7.44-7.23 (m, 7H), 6.02 (s, 1H), 2.49 (s, 3H), 2.05-1.91 (m, 2H), 1.84-1.53 (m, 6H) ppm.

$^{13}\text{C NMR}$  (75 MHz,  $\text{CDCl}_3$ )  $\delta$  199.7, 167.2, 161.0, 141.0, 135.2, 130.2, 129.7, 128.6, 128.34, 128.26, 127.2, 114.4, 73.0, 33.9, 23.6, 11.7 ppm.

**HRMS** (ESI)  $m/z$  Calcd for  $\text{C}_{22}\text{H}_{23}\text{N}_2\text{O}_4\text{S}$  [ $\text{M}^+\text{H}$ ]: 411.1373, Found: 411.1375.

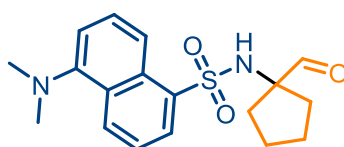

18

**5-(Dimethylamino)-N-(1-formylcyclopentyl)naphthalene-1-sulfonamide (18)** was prepared as a green solid from Dansylamide (100.0 mg, 0.4 mmol, 1.0 equiv), cyclopentanecarbaldehyde (78.5 mg, 0.8 mmol, 2.0 equiv), aminocatalyst **A** (24.0  $\mu$ L, 0.12 mmol, 0.3 equiv,  $d = 0.912$  g/mL), TBAB (129.7 mg, 0.4 mmol, 1.0 equiv), and H<sub>2</sub>O (7.2  $\mu$ L, 0.4 mmol, 1.0 equiv,  $d = 1.000$  g/mL) in ACN (4 mL) according to the General Procedure II (16 h, purified by flash column chromatography, eluent: *n*-hexane/ethyl acetate = 12/1 to 9/1, 92.6 mg, 67% yield).

<sup>1</sup>H NMR (300 MHz, CDCl<sub>3</sub>)  $\delta$  9.67 (s, 1H), 8.55 (d,  $J = 8.5$  Hz, 1H), 8.32 (d,  $J = 8.6$  Hz, 1H), 8.24 (d,  $J = 7.3$  Hz, 1H), 7.55 (dt,  $J_1 = 21.7$  Hz,  $J_2 = 7.9$  Hz, 2H), 7.19 (d,  $J = 7.5$  Hz, 1H), 6.04 (s, 1H), 2.89 (s, 6H), 1.96-1.81 (m, 2H), 1.70-1.56 (m, 2H), 1.54-1.30 (m, 4H) ppm.

<sup>13</sup>C NMR (75 MHz, CDCl<sub>3</sub>)  $\delta$  200.0, 152.0, 137.0, 130.6, 129.7, 129.4, 128.9, 128.5, 123.2, 118.6, 115.2, 73.1, 45.4, 33.8, 23.5 ppm.

HRMS (ESI)  $m/z$  Calcd for C<sub>18</sub>H<sub>22</sub>N<sub>2</sub>NaO<sub>3</sub>S [M<sup>+</sup>+Na]: 369.1243, Found: 369.1242.

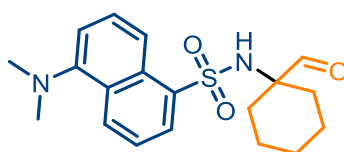

19

**5-(Dimethylamino)-N-(1-formylcyclohexyl)naphthalene-1-sulfonamide (19)** was prepared as a green solid from Dansylamide (100.4 mg, 0.4 mmol, 1.0 equiv), cyclohexanecarbaldehyde (89.7 mg, 0.8 mmol, 2.0 equiv), aminocatalyst **A** (24.0  $\mu$ L, 0.12 mmol, 0.3 equiv,  $d = 0.912$  g/mL), TBAB (129.2 mg, 0.4 mmol, 1.0 equiv), and H<sub>2</sub>O (7.2  $\mu$ L, 0.4 mmol, 1.0 equiv,  $d = 1.000$  g/mL) in ACN (4 mL) according to the General Procedure II (16 h, purified by flash column chromatography, eluent: *n*-hexane/ethyl

acetate = 12/1 to 9/1, 124.1 mg, 86% yield).

$^1\text{H NMR}$  (300 MHz,  $\text{CDCl}_3$ )  $\delta$  9.69 (s, 1H), 8.55 (d,  $J = 8.5$  Hz, 1H), 8.46 (d,  $J = 8.6$  Hz, 1H), 8.28 (d,  $J = 7.3$  Hz, 1H), 7.64 (t,  $J = 8.1$  Hz, 1H), 7.51 (t,  $J = 7.9$  Hz, 1H), 7.20 (d,  $J = 7.5$  Hz, 1H), 6.34 (s, 1H), 2.89 (s, 6H), 1.66 (d,  $J = 13.8$  Hz, 2H), 1.51 (t,  $J = 11.4$  Hz, 2H), 1.28-1.14 (m, 3H), 1.10-0.78 (m, 3H) ppm.

$^{13}\text{C NMR}$  (75 MHz,  $\text{CDCl}_3$ )  $\delta$  201.3, 151.9, 136.9, 130.5, 129.5, 129.4, 128.9, 128.5, 123.1, 118.4, 115.1, 65.5, 45.3, 29.6, 24.5, 20.2 ppm.

**HRMS** (ESI)  $m/z$  Calcd for  $\text{C}_{19}\text{H}_{24}\text{N}_2\text{NaO}_3\text{S}$  [ $\text{M}^+\text{Na}$ ]: 383.1400, Found: 383.1400.

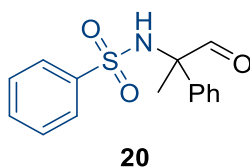

**N-(1-Oxo-2-phenylpropan-2-yl)benzenesulfonamide (20)** was prepared as a colorless oil from benzenesulfonamide (63.0 mg, 0.4 mmol, 1.0 equiv), 2-phenylpropanal **1** (107.0  $\mu\text{L}$ , 0.8 mmol, 2.0 equiv,  $d = 1.002$  g/mL), aminocatalyst **B** (19.7 mg, 0.08 mmol, 0.2 equiv), TBAB (129.0 mg, 0.4 mmol, 1.0 equiv), and  $\text{H}_2\text{O}$  (7.2  $\mu\text{L}$ , 0.4 mmol, 1.0 equiv,  $d = 1.000$  g/mL) in ACN (4 mL) according to the General Procedure I (22 h, purified by flash column chromatography, eluent: *n*-hexane/ethyl acetate = 9/1, 93.9 mg, 81% yield).

$^1\text{H NMR}$  (300 MHz,  $\text{CDCl}_3$ )  $\delta$  9.12 (s, 1H), 7.48-7.36 (m, 3H), 7.29-7.07 (m, 7H), 6.10 (s, 1H), 1.90 (s, 3H) ppm.

$^{13}\text{C NMR}$  (75 MHz,  $\text{CDCl}_3$ )  $\delta$  194.2, 141.8, 133.6, 131.9, 128.74, 128.65, 128.5, 127.5, 126.5, 66.7, 19.9 ppm.

**HRMS** (ESI)  $m/z$  Calcd for  $\text{C}_{15}\text{H}_{15}\text{NNaO}_3\text{S}$  [ $\text{M}^+\text{Na}$ ]: 312.0665, Found: 312.0664.

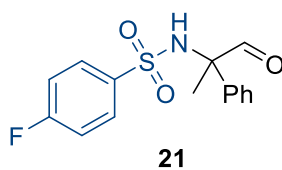

**4-Fluoro-*N*-(1-oxo-2-phenylpropan-2-yl)benzenesulfonamide (21)** was prepared as a colorless oil from 4-fluorobenzenesulfonamide (70.3 mg, 0.4 mmol, 1.0 equiv), 2-phenylpropanal **1** (107.0 uL, 0.8 mmol, 2.0 equiv,  $d = 1.002$  g/mL), aminocatalyst **B** (19.8 mg, 0.08 mmol, 0.2 equiv), TBAB (129.3 mg, 0.4 mmol, 1.0 equiv), and H<sub>2</sub>O (7.2 uL, 0.4 mmol, 1.0 equiv,  $d = 1.000$  g/mL) in ACN (4 mL) according to the General Procedure I (22 h, purified by flash column chromatography, eluent: *n*-hexane/ethyl acetate = 12/1 to 10/1, 104.6 mg, 85% yield).

<sup>1</sup>H NMR (300 MHz, CDCl<sub>3</sub>)  $\delta$  9.11 (s, 1H), 7.41 (dd,  $J_1 = 8.7$  Hz,  $J_2 = 5.1$  Hz, 2H), 7.30-7.12 (m, 3H), 7.12-7.03 (m, 2H), 6.88 (t,  $J = 8.6$  Hz, 2H), 6.17 (s, 1H), 1.92 (s, 3H) ppm.

<sup>13</sup>C NMR (75 MHz, CDCl<sub>3</sub>)  $\delta$  194.0, 164.4 (d,  $J = 254.1$  Hz), 137.9 (d,  $J = 3.2$  Hz), 133.3, 129.2 (d,  $J = 9.4$  Hz), 128.8, 127.6, 115.6 (d,  $J = 22.6$  Hz), 66.6, 19.9 ppm.

<sup>19</sup>F NMR (282 MHz, CDCl<sub>3</sub>)  $\delta$  -106.3 ppm.

HRMS (ESI)  $m/z$  Calcd for C<sub>15</sub>H<sub>14</sub>FNNaO<sub>3</sub>S [ $M^+ + Na$ ]: 330.0571, Found: 330.0572.

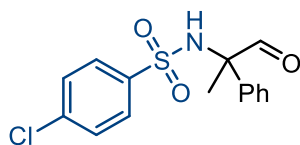

**22**

**4-Chloro-*N*-(1-oxo-2-phenylpropan-2-yl)benzenesulfonamide (22)** was prepared as white solid from 4-chlorobenzenesulfonamide (77.0 mg, 0.4 mmol, 1.0 equiv), 2-phenylpropanal **1** (107.0 uL, 0.8 mmol, 2.0 equiv,  $d = 1.002$  g/mL), aminocatalyst **B** (19.7 mg, 0.08 mmol, 0.2 equiv), TBAB (129.1 mg, 0.4 mmol, 1.0 equiv), and H<sub>2</sub>O (7.2 uL, 0.4 mmol, 1.0 equiv,  $d = 1.000$  g/mL) in ACN (4 mL) electrocatalysis was performed with a constant current of 2.0 mA according to the General Procedure I (22 h, purified by flash column chromatography, eluent: *n*-hexane/ethyl acetate = 12/1 to 10/1, 91.7 mg, 71% yield).

<sup>1</sup>H NMR (300 MHz, CDCl<sub>3</sub>)  $\delta$  9.10 (s, 1H), 7.36-7.29 (m, 2H), 7.28-7.21 (m, 1H), 7.21-7.14 (m, 4H), 7.09-7.03 (m, 2H), 6.17 (s, 1H), 1.93 (s, 3H) ppm.

<sup>13</sup>C NMR (75 MHz, CDCl<sub>3</sub>)  $\delta$  193.9, 140.3, 138.3, 133.2, 128.8, 128.7, 128.0, 127.7, 66.6,

19.9 ppm.

HRMS (ESI)  $m/z$  Calcd for  $C_{15}H_{14}ClNNaO_3S$  [ $M^++Na$ ]: 346.0275, Found: 346.0277.

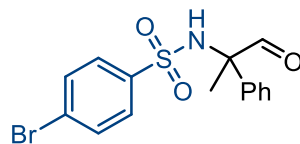

**23**

**4-Bromo-N-(1-oxo-2-phenylpropan-2-yl)benzenesulfonamide (23)** was prepared as a white solid from 4-bromobenzenesulfonamide (95.0 mg, 0.4 mmol, 1.0 equiv), 2-phenylpropanal **1** (107.0  $\mu$ L, 0.8 mmol, 2.0 equiv,  $d = 1.002$  g/mL), aminocatalyst **B** (19.7 mg, 0.08 mmol, 0.2 equiv), TBAB (129.4 mg, 0.4 mmol, 1.0 equiv), and  $H_2O$  (7.2  $\mu$ L, 0.4 mmol, 1.0 equiv,  $d = 1.000$  g/mL) in ACN (4 mL) according to the General Procedure I (18 h, purified by flash column chromatography, eluent: *n*-hexane/ethyl acetate = 12/1, 109.3 mg, 74% yield).

$^1H$  NMR (300 MHz,  $CDCl_3$ )  $\delta$  9.09 (s, 1H), 7.38-7.30 (m, 2H), 7.28-7.13 (m, 5H), 7.09-7.01 (m, 2H), 6.16 (s, 1H), 1.93 (s, 3H) ppm.

$^{13}C$  NMR (75 MHz,  $CDCl_3$ )  $\delta$  193.8, 140.8, 133.1, 131.7, 128.8, 128.1, 127.7, 126.8, 66.6, 19.9 ppm.

HRMS (ESI)  $m/z$  Calcd for  $C_{15}H_{14}BrKNO_3S$  [ $M^++K$ ]: 405.9509, Found: 405.9512.

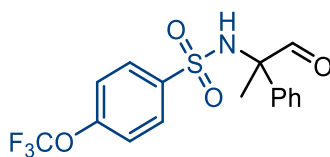

**24**

**N-(1-Oxo-2-phenylpropan-2-yl)-4-(trifluoromethoxy)benzenesulfonamide (24)** was prepared as a white solid from 4-(trifluoromethoxy)benzenesulfonamide (97.1mg, 0.4 mmol, 1.0 equiv), 2-phenylpropanal **1** (107.0  $\mu$ L, 0.8 mmol, 2.0 equiv,  $d = 1.002$  g/mL), aminocatalyst **B** (19.9 mg, 0.08 mmol, 0.2 equiv), TBAB (129.2 mg, 0.4 mmol, 1.0 equiv), and  $H_2O$  (7.2  $\mu$ L, 0.4 mmol, 1.0 equiv,  $d = 1.000$  g/mL) in ACN (4 mL) according to the

General Procedure I (36 h, purified by flash column chromatography, eluent: *n*-hexane/ethyl acetate = 12/1 to 10/1, 82.2 mg, 55% yield).

<sup>1</sup>H NMR (300 MHz, CDCl<sub>3</sub>) δ 9.08 (s, 1H), 7.42-7.35 (m, 2H), 7.24-7.17 (m, 1H), 7.16-7.09 (m, 2H), 7.05-6.98 (m, 4H), 6.18 (s, 1H), 1.98 (s, 3H) ppm.

<sup>13</sup>C NMR (201 MHz, CDCl<sub>3</sub>) δ 193.8, 151.30 (q, *J* = 2.0 Hz), 140.1, 132.7, 128.9, 128.8, 128.6, 127.9, 120.5, 120.2 (q, *J* = 258.6 Hz), 66.5, 19.9 ppm.

<sup>19</sup>F NMR (282 MHz, CDCl<sub>3</sub>) δ -57.7 ppm.

HRMS (ESI) *m/z* Calcd for C<sub>16</sub>H<sub>15</sub>F<sub>3</sub>NO<sub>4</sub>S [M<sup>+</sup>+H]: 374.0668, Found: 374.0669.

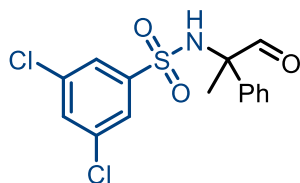

**25**

**3,5-Dichloro-*N*-(1-oxo-2-phenylpropan-2-yl)benzenesulfonamide (25)** was prepared as a white solid from 3,5-dichlorobenzenesulfonamide (90.7mg, 0.4 mmol, 1.0 equiv), 2-phenylpropanal **1** (107.0 uL, 0.8 mmol, 2.0 equiv, *d* = 1.002 g/mL), aminocatalyst **B** (19.9 mg, 0.08 mmol, 0.2 equiv), TBAB (129.2 mg, 0.4 mmol, 1.0 equiv), and H<sub>2</sub>O (7.2 uL, 0.4 mmol, 1.0 equiv, *d* = 1.000 g/mL) in ACN (4 mL) according to the General Procedure I (22 h, purified by flash column chromatography, eluent: *n*-hexane/ethyl acetate = 15/1 to 12/1, 136.1 mg, 95% yield).

<sup>1</sup>H NMR (300 MHz, CDCl<sub>3</sub>) δ 9.09 (s, 1H), 7.37-7.12 (m, 6H), 7.04 (d, *J* = 7.5 Hz, 2H), 6.33 (s, 1H), 1.99 (s, 3H) ppm.

<sup>13</sup>C NMR (75 MHz, CDCl<sub>3</sub>) δ 193.6, 144.1, 135.1, 132.1, 131.7, 129.4, 128.6, 127.8, 125.0, 66.5, 19.9 ppm.

HRMS (ESI) *m/z* Calcd for C<sub>15</sub>H<sub>13</sub>Cl<sub>2</sub>NNaO<sub>3</sub>S [M<sup>+</sup>+Na]: 379.9885, Found: 379.9888.

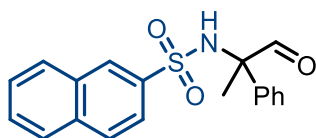

26

**N-(1-Oxo-2-phenylpropan-2-yl)naphthalene-2-sulfonamide (26)** was prepared as a white solid from naphthalene-2-sulfonamide (83.1 mg, 0.4 mmol, 1.0 equiv), 2-phenylpropanal **1** (107.0 uL, 0.8 mmol, 2.0 equiv,  $d = 1.002$  g/mL), aminocatalyst **B** (19.9 mg, 0.08 mmol, 0.2 equiv), TBAB (129.1 mg, 0.4 mmol, 1.0 equiv), and H<sub>2</sub>O (7.2 uL, 0.4 mmol, 1.0 equiv,  $d = 1.000$  g/mL) in ACN (4 mL) according to the General Procedure I (22 h, purified by flash column chromatography, eluent: *n*-hexane/ethyl acetate = 12/1 to 9/1, 69.3 mg, 51% yield). The NMR data are in consistent with the reported literature.<sup>[1]</sup>

<sup>1</sup>H NMR (300 MHz, CDCl<sub>3</sub>)  $\delta$  9.11 (s, 1H), 7.86-7.72 (m, 3H), 7.68 (d,  $J = 7.9$  Hz, 1H), 7.63-7.48 (m, 3H), 7.10-6.93 (m, 5H), 6.15 (s, 1H), 1.93 (s, 3H) ppm.

<sup>13</sup>C NMR (75 MHz, CDCl<sub>3</sub>)  $\delta$  194.2, 138.4, 134.3, 133.1, 131.8, 129.2, 128.9, 128.7, 128.53, 128.50, 127.9, 127.6, 127.5, 127.1, 121.8, 66.7, 20.0 ppm.

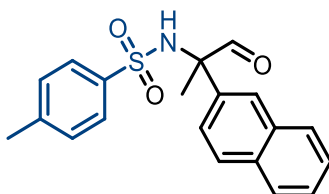

27

**4-Methyl-N-(2-(naphthalen-2-yl)-1-oxopropan-2-yl)benzenesulfonamide (27)** was prepared as a white solid from 4-methylbenzenesulfonamide (69.0 mg, 0.4 mmol, 1.0 equiv), 2-(naphthalen-2-yl)propanal (148.0 mg, 0.8 mmol, 2.0 equiv), aminocatalyst **B** (19.7 mg, 0.08 mmol, 0.2 equiv), TBAB (129.3 mg, 0.4 mmol, 1.0 equiv), and H<sub>2</sub>O (7.2 uL, 0.4 mmol, 1.0 equiv,  $d = 1.000$  g/mL) in ACN (4 mL) according to the General Procedure I (18 h, purified by flash column chromatography, eluent: *n*-hexane/ethyl acetate = 10/1 to 9/1, 122.6 mg, 87% yield). The NMR data are in consistent with the

reported literature.<sup>[2]</sup>

<sup>1</sup>H NMR (300 MHz, CDCl<sub>3</sub>) δ 9.17 (s, 1H), 7.71 (d, *J* = 8.1 Hz, 1H), 7.62 (d, *J* = 7.1 Hz, 1H), 7.57-7.39 (m, 4H), 7.22 (d, *J* = 8.1 Hz, 2H), 7.09 (d, *J* = 8.7 Hz, 1H), 6.72 (d, *J* = 8.0 Hz, 2H), 6.19 (s, 1H), 2.11 (s, 3H), 1.98 (s, 3H) ppm.

<sup>13</sup>C NMR (75 MHz, CDCl<sub>3</sub>) δ 194.3, 142.5, 138.6, 132.8, 132.7, 130.7, 128.7, 128.5, 128.1, 127.5, 127.2, 126.8, 126.4, 126.3, 124.3, 66.7, 21.1, 19.9 ppm.

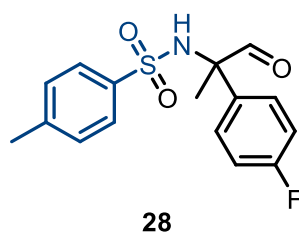

**N-(2-(4-Fluorophenyl)-1-oxopropan-2-yl)-4-methylbenzenesulfonamide (28)** was prepared as a colorless oil from 4-methylbenzenesulfonamide (69.0 mg, 0.4 mmol, 1.0 equiv), 2-(4-fluorophenyl)propanal (122.0 mg, 0.8 mmol, 2.0 equiv), aminocatalyst **B** (19.7 mg, 0.08 mmol, 0.2 equiv), TBAB (129.2 mg, 0.4 mmol, 1.0 equiv), and H<sub>2</sub>O (7.2 uL, 0.4 mmol, 1.0 equiv, *d* = 1.000 g/mL) in ACN (4 mL) according to the General Procedure I (18 h, purified by flash column chromatography, eluent: *n*-hexane/ethyl acetate = 10/1 to 9/1, 109.2 mg, 85% yield). The NMR data are in consistent with the reported literature.<sup>[2]</sup>

<sup>1</sup>H NMR (300 MHz, CDCl<sub>3</sub>) δ 9.08 (s, 1H), 7.34 (d, *J* = 8.1 Hz, 2H), 7.08 (d, *J* = 7.1 Hz, 4H), 6.85 (t, *J* = 8.5 Hz, 2H), 5.98 (s, 1H), 2.36 (s, 3H), 1.90 (s, 3H) ppm.

<sup>13</sup>C NMR (75 MHz, CDCl<sub>3</sub>) δ 193.9, 162.8 (d, *J* = 249.4 Hz), 143.0, 139.0, 129.8 (d, *J* = 3.3 Hz), 129.6 (d, *J* = 8.5 Hz), 129.2, 126.6, 115.7 (d, *J* = 21.8 Hz), 66.2, 21.4, 20.1 ppm.

<sup>19</sup>F NMR (376 MHz, CDCl<sub>3</sub>) δ -112.7 ppm.

---

[2]T. Baumann, M. Bächle and S. Bräse, *Org. Lett.*, 2006, **8**, 3797–3800.

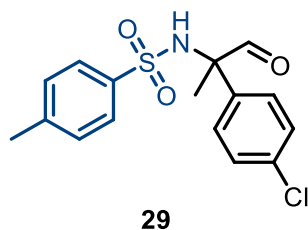

**N-(2-(4-Chlorophenyl)-1-oxopropan-2-yl)-4-methylbenzenesulfonamide (29)** was prepared as a white solid from 4-methylbenzenesulfonamide (68.5 mg, 0.4 mmol, 1.0 equiv), 2-(4-chlorophenyl)propanal (135.0 mg, 0.8 mmol, 2.0 equiv), aminocatalyst **B** (19.7 mg, 0.08 mmol, 0.2 equiv), TBAB (128.5 mg, 0.4 mmol, 1.0 equiv), and H<sub>2</sub>O (7.2 uL, 0.4 mmol, 1.0 equiv, d = 1.000 g/mL) in ACN (4 mL) according to the General Procedure I (constant current of 3.0 mA, 13 h, purified by flash column chromatography, eluent: *n*-hexane/ethyl acetate = 12/1 to 10/1, 106.8 mg, 79% yield).

<sup>1</sup>H NMR (300 MHz, CDCl<sub>3</sub>) δ 9.09 (s, 1H), 7.33 (d, *J* = 7.9 Hz, 2H), 7.16-6.96 (m, 6H), 6.04 (s, 1H), 2.38 (s, 3H), 1.89 (s, 3H) ppm.

<sup>13</sup>C NMR (75 MHz, CDCl<sub>3</sub>) δ 193.8, 143.0, 138.8, 135.0, 132.3, 129.2, 129.0, 128.8, 126.6, 66.2, 21.4, 19.9 ppm.

HRMS (ESI) *m/z* Calcd for C<sub>16</sub>H<sub>17</sub>ClNO<sub>3</sub>S [M<sup>+</sup>+H]: 338.0612, Found: 338.0614.

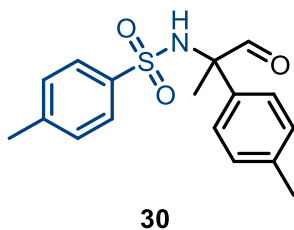

**4-Methyl-N-(1-oxo-2-(*p*-tolyl)propan-2-yl)benzenesulfonamide (30)** was prepared as a colorless oil from 4-methylbenzenesulfonamide (68.6 mg, 0.4 mmol, 1.0 equiv), 2-(*p*-tolyl)propanal (119.0 mg, 0.8 mmol, 2.0 equiv), aminocatalyst **B** (19.8 mg, 0.08 mmol, 0.2 equiv), TBAB (128.9 mg, 0.4 mmol, 1.0 equiv), and H<sub>2</sub>O (7.2 uL, 0.4 mmol, 1.0 equiv, d = 1.000 g/mL) in ACN (4 mL) according to the General Procedure I (15 h, purified by flash column chromatography, eluent: *n*-hexane/ethyl acetate = 10/1 to 9/1, 85.1 mg, 67% yield). The NMR data are in consistent with the reported literature.<sup>[2]</sup>

$^1\text{H NMR}$  (300 MHz,  $\text{CDCl}_3$ )  $\delta$  9.10 (s, 1H), 7.35 (d,  $J = 8.0$  Hz, 2H), 7.04 (d,  $J = 7.9$  Hz, 2H), 7.01-6.91 (m, 4H), 5.99 (s, 1H), 2.35 (s, 3H), 2.28 (s, 3H), 1.85 (s, 3H) ppm.

$^{13}\text{C NMR}$  (75 MHz,  $\text{CDCl}_3$ )  $\delta$  194.3, 142.6, 139.0, 138.6, 130.8, 129.4, 129.0, 127.4, 126.6, 66.4, 21.4, 20.9, 19.8 ppm.

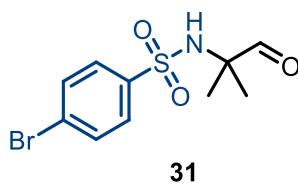

**4-Bromo-N-(2-methyl-1-oxopropan-2-yl)benzenesulfonamide (31)** was prepared as a white solid from 4-bromobenzenesulfonamide (94.4 mg, 0.4 mmol, 1.0 equiv), isobutyraldehyde (57.7 mg, 0.8 mmol, 2.0 equiv), aminocatalyst A (24.0  $\mu\text{L}$ , 0.12 mmol, 0.3 equiv,  $d = 0.912$  g/mL), TBAB (129.1 mg, 0.4 mmol, 1.0 equiv), and  $\text{H}_2\text{O}$  (7.2  $\mu\text{L}$ , 0.4 mmol, 1.0 equiv,  $d = 1.000$  g/mL) in ACN (4 mL) according to the General Procedure II (13 h, purified by flash column chromatography, eluent: *n*-hexane/ethyl acetate = 7/1 to 5/1, 101.0 mg, 82% yield).

$^1\text{H NMR}$  (300 MHz,  $\text{CDCl}_3$ )  $\delta$  9.44 (s, 1H), 7.76 (d,  $J = 8.4$  Hz, 2H), 7.64 (d,  $J = 8.3$  Hz, 2H), 5.72 (s, 1H), 1.30 (s, 6H) ppm.

$^{13}\text{C NMR}$  (75 MHz,  $\text{CDCl}_3$ )  $\delta$  199.1, 141.6, 132.4, 128.3, 127.6, 62.5, 22.4 ppm.

**HRMS** (ESI)  $m/z$  Calcd for  $\text{C}_{10}\text{H}_{12}\text{BrNNaO}_3\text{S}$  [ $\text{M}^+ + \text{Na}$ ]: 327.9613, Found: 327.9612.

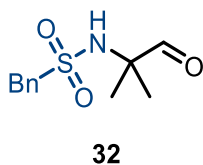

**N-(2-Methyl-1-oxopropan-2-yl)-1-phenylmethanesulfonamide (32)** was prepared as a white solid from phenylmethanesulfonamide (80.5 mg, 0.4 mmol, 1.0 equiv), isobutyraldehyde (57.7 mg, 0.8 mmol, 2.0 equiv), aminocatalyst A (24.0  $\mu\text{L}$ , 0.12 mmol, 0.3 equiv,  $d = 0.912$  g/mL), TBAB (129.1 mg, 0.4 mmol, 1.0 equiv), and  $\text{H}_2\text{O}$  (7.2  $\mu\text{L}$ , 0.4 mmol, 1.0 equiv,  $d = 1.000$  g/mL) in ACN (4 mL) according to the General Procedure

II (20 h, purified by flash column chromatography, eluent: *n*-hexane/ethyl acetate = 6/1 to 5/1, 58.1 mg, 60% yield).

$^1\text{H NMR}$  (300 MHz,  $\text{CDCl}_3$ )  $\delta$  9.30 (s, 1H), 7.39 (s, 5H), 5.01 (s, 1H), 4.27 (s, 2H), 1.35 (s, 6H) ppm.

$^{13}\text{C NMR}$  (75 MHz,  $\text{CDCl}_3$ )  $\delta$  199.6, 130.8, 129.1, 128.8, 128.7, 62.7, 61.7, 22.8 ppm.

**HRMS** (ESI)  $m/z$  Calcd for  $\text{C}_{11}\text{H}_{16}\text{NO}_3\text{S}$  [ $\text{M}^+\text{+H}$ ]: 242.0845, Found: 242.0842.

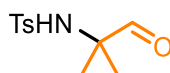

**33**

**4-Methyl-N-(2-methyl-1-oxopropan-2-yl)benzenesulfonamide (33)** was prepared as a white solid from 4-methylbenzenesulfonamide (68.5 mg, 0.4 mmol, 1.0 equiv), isobutyraldehyde (57.7 mg, 0.8 mmol, 2.0 equiv), aminocatalyst A (24.0  $\mu\text{L}$ , 0.12 mmol, 0.3 equiv,  $d = 0.912$  g/mL), TBAB (130.1 mg, 0.4 mmol, 1.0 equiv), and  $\text{H}_2\text{O}$  (7.2  $\mu\text{L}$ , 0.4 mmol, 1.0 equiv,  $d = 1.000$  g/mL) in ACN (4 mL) according to the General Procedure II (22 h, purified by flash column chromatography, eluent: *n*-hexane/ethyl acetate = 8/1 to 7/1, 67.6 mg, 70% yield). The NMR data are in consistent with the reported literature.<sup>[1]</sup>

$^1\text{H NMR}$  (300 MHz,  $\text{CDCl}_3$ )  $\delta$  9.47 (s, 1H), 7.78 (d,  $J = 8.3$  Hz, 2H), 7.29 (d,  $J = 8.2$  Hz, 2H), 5.72 (s, 1H), 2.42 (s, 3H), 1.27 (s, 6H) ppm.

$^{13}\text{C NMR}$  (75 MHz,  $\text{CDCl}_3$ )  $\delta$  199.7, 143.5, 139.5, 129.6, 126.8, 62.3, 22.3, 21.4 ppm.

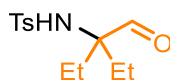

**34**

**N-(3-Formylpentan-3-yl)-4-methylbenzenesulfonamide (34)** was prepared as a white solid from 4-methylbenzenesulfonamide (69.0 mg, 0.4 mmol, 1.0 equiv), 2-ethylbutanal (80.1 mg, 0.8 mmol, 2.0 equiv), aminocatalyst A (24.0  $\mu\text{L}$ , 0.12 mmol, 0.3 equiv,  $d = 0.912$  g/mL), TBAB (131.0 mg, 0.4 mmol, 1.0 equiv), and  $\text{H}_2\text{O}$  (7.2  $\mu\text{L}$ , 0.4

mmol, 1.0 equiv,  $d = 1.000$  g/mL) in ACN (4 mL) according to the General Procedure II (22 h, purified by flash column chromatography, eluent: *n*-hexane/ethyl acetate = 8/1 to 7/1, 68.8 mg, 65% yield). The NMR data are in consistent with the reported literature.<sup>[1]</sup>

<sup>1</sup>H NMR (300 MHz, CDCl<sub>3</sub>)  $\delta$  9.20 (s, 1H), 7.78 (d,  $J = 8.2$  Hz, 2H), 7.28 (d,  $J = 8.4$  Hz, 2H), 5.25 (s, 1H), 2.42 (s, 3H), 2.04 (dq,  $J_1 = 15.0$  Hz,  $J_2 = 7.5$  Hz, 2H), 1.69 (dq,  $J_1 = 15.3$  Hz,  $J_2 = 7.6$  Hz, 2H), 0.59 (t,  $J = 7.5$  Hz, 6H) ppm.

<sup>13</sup>C NMR (75 MHz, CDCl<sub>3</sub>)  $\delta$  199.4, 143.3, 139.7, 129.5, 126.8, 70.3, 26.3, 21.5, 7.5 ppm.

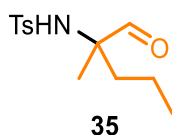

**4-Methyl-N-(2-methyl-1-oxopentan-2-yl)benzenesulfonamide (35)** was prepared as a white solid from 4-methylbenzenesulfonamide (69.0 mg, 0.4 mmol, 1.0 equiv), 2-methylpentanal (80.1 mg, 0.8 mmol, 2.0 equiv), aminocatalyst **A** (24.0  $\mu$ L, 0.12 mmol, 0.3 equiv,  $d = 0.912$  g/mL), TBAB (130.1 mg, 0.4 mmol, 1.0 equiv), and H<sub>2</sub>O (7.2  $\mu$ L, 0.4 mmol, 1.0 equiv,  $d = 1.000$  g/mL) in ACN (4 mL) according to the General Procedure II (22 h, purified by flash column chromatography, eluent: *n*-hexane/ethyl acetate = 8/1 to 7/1, 78.0 mg, 72% yield). The NMR data are in consistent with the reported literature.<sup>[1]</sup>

<sup>1</sup>H NMR (300 MHz, CDCl<sub>3</sub>)  $\delta$  9.38 (s, 1H), 7.77 (d,  $J = 8.3$  Hz, 2H), 7.29 (d,  $J = 8.1$  Hz, 2H), 5.66 (s, 1H), 2.42 (s, 3H), 1.83-1.71 (m, 1H), 1.64-1.50 (m, 1H), 1.34-1.15 (m, 4H), 1.12-0.93 (m, 1H), 0.76 (t,  $J = 7.3$  Hz, 3H) ppm.

<sup>13</sup>C NMR (75 MHz, CDCl<sub>3</sub>)  $\delta$  199.7, 143.3, 139.7, 129.5, 126.7, 65.5, 37.7, 21.4, 19.8, 16.4, 13.8 ppm.

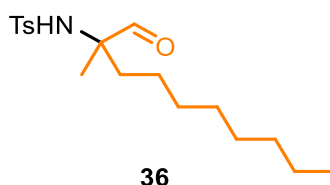

**4-Methyl-N-(2-methyl-1-oxodecan-2-yl)benzenesulfonamide (36)** was prepared as a white solid from 4-methylbenzenesulfonamide (69.1 mg, 0.4 mmol, 1.0 equiv), 2-methyldecanal (136.0 mg, 0.8 mmol, 2.0 equiv), aminocatalyst **A** (24.0  $\mu$ L, 0.12 mmol, 0.3 equiv,  $d = 0.912$  g/mL), TBAB (128.9 mg, 0.4 mmol, 1.0 equiv), and H<sub>2</sub>O (7.2  $\mu$ L, 0.4 mmol, 1.0 equiv,  $d = 1.000$  g/mL) in ACN (4 mL) according to the General Procedure II (22 h, purified by flash column chromatography, eluent: *n*-hexane/ethyl acetate = 18/1 to 15/1, 70.4 mg, 52% yield).

<sup>1</sup>H NMR (300 MHz, CDCl<sub>3</sub>)  $\delta$  9.32 (s, 1H), 7.76 (d,  $J = 8.2$  Hz, 2H), 7.28 (d,  $J = 8.4$  Hz, 2H), 5.34 (s, 1H), 2.42 (s, 3H), 1.90-1.75 (m, 1H), 1.64-1.53 (m, 1H), 1.33-1.03 (m, 14H), 1.00-0.82 (m, 4H) ppm.

<sup>13</sup>C NMR (75 MHz, CDCl<sub>3</sub>)  $\delta$  199.4, 143.3, 139.8, 129.6, 126.8, 65.6, 35.7, 31.8, 29.5, 29.3, 29.1, 23.3, 22.6, 21.5, 20.3, 14.1 ppm.

HRMS (ESI)  $m/z$  Calcd for C<sub>18</sub>H<sub>30</sub>NO<sub>3</sub>S [M<sup>+</sup>+H]: 340.1941, Found: 340.1943.

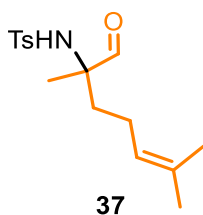

**N-(2,6-Dimethyl-1-oxohept-5-en-2-yl)-4-methylbenzenesulfonamide (37)** was prepared as a colorless oil from 4-methylbenzenesulfonamide (68.6 mg, 0.4 mmol, 1.0 equiv), 2,6-dimethylhept-5-enal (112.0 mg, 0.8 mmol, 2.0 equiv), aminocatalyst **A** (24.0  $\mu$ L, 0.12 mmol, 0.3 equiv,  $d = 0.912$  g/mL), TBAB (131.1 mg, 0.4 mmol, 1.0 equiv), and H<sub>2</sub>O (7.2  $\mu$ L, 0.4 mmol, 1.0 equiv,  $d = 1.000$  g/mL) in ACN (4 mL) according to the General Procedure II (22 h, purified by flash column chromatography, eluent: *n*-hexane/ethyl acetate = 9/1 to 8/1, 81.5 mg, 69% yield).

$^1\text{H NMR}$  (300 MHz,  $\text{CDCl}_3$ )  $\delta$  9.31 (s, 1H), 7.77 (d,  $J = 8.2$  Hz, 2H), 7.28 (d,  $J = 7.9$  Hz, 2H), 5.58 (s, 1H), 4.87 (t,  $J = 6.4$  Hz, 1H), 2.41 (s, 3H), 2.02-1.87 (m, 2H), 1.86-1.67 (m, 2H), 1.62 (s, 3H), 1.50 (s, 3H), 1.24 (s, 3H) ppm.

$^{13}\text{C NMR}$  (75 MHz,  $\text{CDCl}_3$ )  $\delta$  199.1, 143.3, 139.8, 133.5, 129.6, 126.7, 122.5, 65.5, 36.0, 25.5, 22.0, 21.4, 20.2, 17.7 ppm.

**HRMS** (ESI)  $m/z$  Calcd for  $\text{C}_{16}\text{H}_{24}\text{NO}_3\text{S}$  [ $\text{M}^+\text{+H}$ ]: 310.1471, Found: 310.1471.

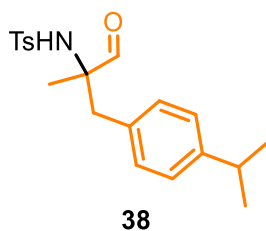

***N*-(1-(4-Isopropylphenyl)-2-methyl-3-oxopropan-2-yl)-4-methylbenzenesulfonamide (38)** was prepared as colorless oil from 4-methylbenzenesulfonamide (68.6 mg, 0.4 mmol, 1.0 equiv), 3-(4-isopropylphenyl)-2-methylpropanal (152.2 mg, 0.8 mmol, 2.0 equiv), aminocatalyst **A** (24.0  $\mu\text{L}$ , 0.12 mmol, 0.3 equiv,  $d = 0.912$  g/mL), TBAB (131.0 mg, 0.4 mmol, 1.0 equiv), and  $\text{H}_2\text{O}$  (7.2  $\mu\text{L}$ , 0.4 mmol, 1.0 equiv,  $d = 1.000$  g/mL) in ACN (4 mL) according to the General Procedure II (22 h, purified by flash column chromatography, eluent: *n*-hexane/ethyl acetate = 9/1 to 7/1, 92.1 mg, 64% yield). The NMR data are in consistent with the reported literature.<sup>[2]</sup>

$^1\text{H NMR}$  (300 MHz,  $\text{CDCl}_3$ )  $\delta$  9.48 (s, 1H), 7.71 (d,  $J = 8.3$  Hz, 2H), 7.26 (d,  $J = 8.1$  Hz, 2H), 7.16 (d,  $J = 8.1$  Hz, 2H), 7.05 (d,  $J = 8.1$  Hz, 2H), 5.14 (s, 1H), 3.02 (s, 2H), 2.88 (hept,  $J = 7.0$  Hz, 1H), 2.41 (s, 3H), 1.29 (s, 3H), 1.25 (s, 3H), 1.22 (s, 3H) ppm.

$^{13}\text{C NMR}$  (75 MHz,  $\text{CDCl}_3$ )  $\delta$  199.8, 148.2, 143.4, 139.8, 131.0, 130.3, 129.6, 126.80, 126.76, 65.6, 42.9, 33.7, 23.9, 21.5, 19.8 ppm.

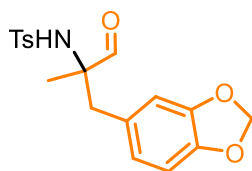

39

**N-(1-(Benzo[*d*][1,3]dioxol-5-yl)-2-methyl-3-oxopropan-2-yl)-4-methylbenzenesulfonamide (39)** was prepared as a colorless oil from 4-methylbenzenesulfonamide (68.9 mg, 0.4 mmol, 1.0 equiv), 3-(benzo[*d*][1,3]dioxol-5-yl)-2-methylpropanal (153.7 mg, 0.8 mmol, 2.0 equiv), aminocatalyst **A** (24.0  $\mu$ L, 0.12 mmol, 0.3 equiv,  $d = 0.912$  g/mL), TBAB (130.0 mg, 0.4 mmol, 1.0 equiv), and H<sub>2</sub>O (7.2  $\mu$ L, 0.4 mmol, 1.0 equiv,  $d = 1.000$  g/mL) in ACN (4 mL) according to the General Procedure II (17 h, purified by flash column chromatography, eluent: *n*-hexane/ethyl acetate = 8/1 to 6/1, 100.0 mg, 75% yield).

<sup>1</sup>H NMR (300 MHz, CDCl<sub>3</sub>)  $\delta$  9.46 (s, 1H), 7.72 (d,  $J = 8.3$  Hz, 2H), 7.27 (d,  $J = 8.1$  Hz, 2H), 6.71 (d,  $J = 7.8$  Hz, 1H), 6.63-6.55 (m, 2H), 5.91 (s, 2H), 5.36 (s, 1H), 3.01 (d,  $J = 14.1$  Hz, 1H), 2.95 (d,  $J = 14.1$  Hz, 1H), 2.40 (s, 3H), 1.25 (s, 3H) ppm.

<sup>13</sup>C NMR (75 MHz, CDCl<sub>3</sub>)  $\delta$  199.6, 147.7, 146.9, 143.4, 139.7, 129.6, 127.4, 126.7, 123.6, 110.6, 108.3, 101.0, 65.6, 42.6, 21.4, 19.6 ppm.

HRMS (ESI)  $m/z$  Calcd for C<sub>18</sub>H<sub>20</sub>NO<sub>5</sub>S [ $M^+ + H$ ]: 362.1057, Found: 362.1058.

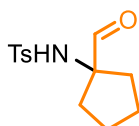

40

**N-(1-Formylcyclopentyl)-4-methylbenzenesulfonamide (40)** was prepared as a white solid from 4-methylbenzenesulfonamide (68.9 mg, 0.4 mmol, 1.0 equiv), cyclopentanecarbaldehyde (78.5 mg, 0.8 mmol, 2.0 equiv), aminocatalyst **A** (24.0  $\mu$ L, 0.12 mmol, 0.3 equiv,  $d = 0.912$  g/mL), TBAB (129.4 mg, 0.4 mmol, 1.0 equiv), and H<sub>2</sub>O (7.2  $\mu$ L, 0.4 mmol, 1.0 equiv,  $d = 1.000$  g/mL) in ACN (4 mL) according to the General Procedure II (22 h, purified by flash column chromatography, eluent: *n*-hexane/ethyl

acetate = 8/1 to 7/1, 70.0 mg, 65% yield).

$^1\text{H NMR}$  (300 MHz,  $\text{CDCl}_3$ )  $\delta$  9.63 (s, 1H), 7.78 (d,  $J = 8.3$  Hz, 2H), 7.30 (d,  $J = 8.1$  Hz, 2H), 5.74 (s, 1H), 2.43 (s, 3H), 2.03-1.90 (m, 2H), 1.78-1.56 (m, 6H) ppm.

$^{13}\text{C NMR}$  (75 MHz,  $\text{CDCl}_3$ )  $\delta$  199.9, 143.6, 139.0, 129.7, 126.8, 72.8, 33.9, 23.8, 21.5 ppm.

**HRMS** (ESI)  $m/z$  Calcd for  $\text{C}_{13}\text{H}_{17}\text{NNaO}_3\text{S}$  [ $\text{M}^+\text{Na}$ ]: 290.0821, Found: 290.0820.

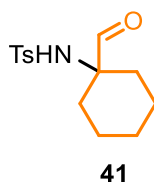

***N*-(1-Formylcyclohexyl)-4-methylbenzenesulfonamide (41)** was prepared as a white solid from 4-methylbenzenesulfonamide (68.6 mg, 0.4 mmol, 1.0 equiv), cyclohexanecarbaldehyde (89.7 mg, 0.8 mmol, 2.0 equiv), aminocatalyst **A** (24.0  $\mu\text{L}$ , 0.12 mmol, 0.3 equiv,  $d = 0.912$  g/mL), TBAB (129.3 mg, 0.4 mmol, 1.0 equiv), and  $\text{H}_2\text{O}$  (7.2  $\mu\text{L}$ , 0.4 mmol, 1.0 equiv,  $d = 1.000$  g/mL) in ACN (4 mL) according to the General Procedure II (17 h, purified by flash column chromatography, eluent: *n*-hexane/ethyl acetate = 8/1 to 7/1, 79.9 mg, 71% yield). The NMR data are in consistent with the reported literature.<sup>[1]</sup>

$^1\text{H NMR}$  (300 MHz,  $\text{CDCl}_3$ )  $\delta$  9.61 (s, 1H), 7.82 (d,  $J = 8.3$  Hz, 2H), 7.31 (d,  $J = 8.0$  Hz, 2H), 5.77 (s, 1H), 2.43 (s, 3H), 1.75-1.55 (m, 4H), 1.49-1.34 (m, 3H), 1.31-1.15 (m, 3H) ppm.

$^{13}\text{C NMR}$  (75 MHz,  $\text{CDCl}_3$ )  $\delta$  201.0, 143.5, 139.2, 129.6, 126.9, 65.2, 30.0, 24.6, 21.5, 20.5 ppm.

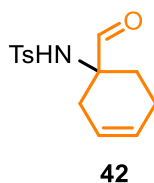

***N*-(1-Formylcyclohex-3-en-1-yl)-4-methylbenzenesulfonamide (42)** was prepared as

a white solid from 4-methylbenzenesulfonamide (68.7 mg, 0.4 mmol, 1.0 equiv), cyclohex-3-ene-1-carbaldehyde (88.0 mg, 0.8 mmol, 2.0 equiv), aminocatalyst **A** (24.0  $\mu$ L, 0.12 mmol, 0.3 equiv,  $d = 0.912$  g/mL), TBAB (130.0 mg, 0.4 mmol, 1.0 equiv), and H<sub>2</sub>O (7.2  $\mu$ L, 0.4 mmol, 1.0 equiv,  $d = 1.000$  g/mL) in ACN (4 mL) according to the General Procedure II (17 h, purified by flash column chromatography, eluent: *n*-hexane/ethyl acetate = 9/1 to 7/1, 73.9 mg, 66% yield).

<sup>1</sup>H NMR (300 MHz, CDCl<sub>3</sub>)  $\delta$  9.67 (s, 1H), 7.77 (d,  $J = 8.3$  Hz, 2H), 7.29 (d,  $J = 8.2$  Hz, 2H), 5.69-5.57 (m, 2H), 5.42-5.32 (m, 1H), 2.43 (s, 3H), 2.41-2.30 (m, 1H), 2.17-2.04 (m, 1H), 2.03-1.67 (m, 4H) ppm.

<sup>13</sup>C NMR (75 MHz, CDCl<sub>3</sub>)  $\delta$  200.1, 143.6, 139.0, 129.6, 126.8, 126.4, 121.9, 63.2, 29.8, 26.6, 21.5, 21.1 ppm.

HRMS (ESI)  $m/z$  Calcd for C<sub>14</sub>H<sub>17</sub>NNaO<sub>3</sub>S [M<sup>+</sup>+Na]: 302.0821, Found: 302.0820.

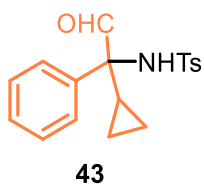

**N-(1-Cyclopropyl-2-oxo-1-phenylethyl)-4-methylbenzenesulfonamide (43)** was prepared as a white solid from 4-methylbenzenesulfonamide (68.6 mg, 0.4 mmol, 1.0 equiv), 2-cyclopropyl-2-phenylacetaldehyde (129.0 mg, 0.8 mmol, 2.0 equiv), aminocatalyst **B** (19.7 mg, 0.08 mmol, 0.2 equiv), TBAB (129.2 mg, 0.4 mmol, 1.0 equiv), and H<sub>2</sub>O (7.2  $\mu$ L, 0.4 mmol, 1.0 equiv,  $d = 1.000$  g/mL) in ACN (4 mL) according to the General Procedure I (22 h, purified by flash column chromatography, eluent: *n*-hexane/ethyl acetate = 10/1, 117.4 mg, 89% yield).

<sup>1</sup>H NMR (300 MHz, CDCl<sub>3</sub>)  $\delta$  9.15 (s, 1H), 7.29-7.11 (m, 7H), 7.02 (d,  $J = 8.2$  Hz, 2H), 5.93 (s, 1H), 2.34 (s, 3H), 1.65-1.51 (m, 1H), 0.85 (dq,  $J_1 = 10.3$  Hz,  $J_2 = 5.4$  Hz, 1H), 0.73-0.54 (m, 2H), 0.47 (dq,  $J_1 = 10.8$  Hz,  $J_2 = 5.5$  Hz, 1H) ppm.

<sup>13</sup>C NMR (75 MHz, CDCl<sub>3</sub>)  $\delta$  193.6, 142.4, 139.3, 133.5, 128.9, 128.8, 128.5, 128.3, 126.4, 69.3, 21.3, 14.9, 2.4, 0.8 ppm.

HRMS (ESI)  $m/z$  Calcd for  $C_{18}H_{19}NNaO_3S$  [ $M^+Na$ ]: 352.0978, Found: 352.0976.

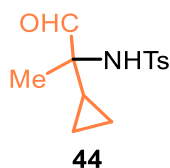

***N*-(2-Cyclopropyl-1-oxopropan-2-yl)-4-methylbenzenesulfonamide (44)** was prepared as a white solid from 4-methylbenzenesulfonamide (68.6 mg, 0.4 mmol, 1.0 equiv), 2-cyclopropylpropanal (78.5 mg, 0.8 mmol, 2.0 equiv), aminocatalyst **A** (24.0  $\mu$ L, 0.12 mmol, 0.3 equiv,  $d = 0.912$  g/mL), TBAB (129.2 mg, 0.4 mmol, 1.0 equiv), and  $H_2O$  (7.2  $\mu$ L, 0.4 mmol, 1.0 equiv,  $d = 1.000$  g/mL) in ACN (4 mL) according to the General Procedure II (16 h, purified by flash column chromatography, eluent: *n*-hexane/ethyl acetate = 6/1 to 5/1, 81.3 mg, 76% yield).

$^1H$  NMR (300 MHz,  $CDCl_3$ )  $\delta$  9.43 (s, 1H), 7.77 (d,  $J = 8.1$  Hz, 2H), 7.28 (d,  $J = 7.9$  Hz, 2H), 5.52 (s, 1H), 2.42 (s, 3H), 1.11 (s, 3H), 0.92 (p,  $J = 7.3$  Hz, 1H), 0.54-0.32 (m, 4H) ppm.

$^{13}C$  NMR (75 MHz,  $CDCl_3$ )  $\delta$  198.6, 143.3, 139.7, 129.6, 126.8, 64.3, 21.5, 16.6, 16.4, 1.2, 0.5 ppm.

HRMS (ESI)  $m/z$  Calcd for  $C_{13}H_{17}NNaO_3S$  [ $M^+Na$ ]: 290.0821, Found: 290.0819.

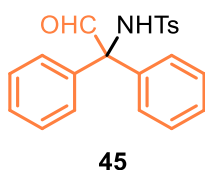

**4-Methyl-*N*-(2-oxo-1,1-diphenylethyl)benzenesulfonamide (45)** was prepared as a white solid from 4-methylbenzenesulfonamide (68.6 mg, 0.4 mmol, 1.0 equiv), 2,2-diphenylacetaldehyde (157.0 mg, 0.8 mmol, 2.0 equiv), aminocatalyst **A** (24.0  $\mu$ L, 0.12 mmol, 0.3 equiv,  $d = 0.912$  g/mL), TBAB (129.1 mg, 0.4 mmol, 1.0 equiv), and  $H_2O$  (7.2  $\mu$ L, 0.4 mmol, 1.0 equiv,  $d = 1.000$  g/mL) in ACN (4 mL) according to the General Procedure II (constant current of 3.0 mA, 18 h, purified by flash column

chromatography, eluent: *n*-hexane/ethyl acetate = 13/1, 95.2 mg, 65% yield). The NMR data are in consistent with the reported literature.<sup>[2]</sup>

**<sup>1</sup>H NMR** (300 MHz, CDCl<sub>3</sub>) δ 9.36 (s, 1H), 7.36-7.19 (m, 10H), 6.99 (d, *J* = 7.7 Hz, 2H), 6.88 (d, *J* = 7.6 Hz, 2H), 6.42 (s, 1H), 2.28 (s, 3H) ppm.

**<sup>13</sup>C NMR** (75 MHz, CDCl<sub>3</sub>) δ 190.6, 142.0, 138.9, 134.2, 129.6, 128.7, 128.6, 128.5, 126.1, 74.1, 21.2 ppm.

## IV. Gram scale reaction and product Derivatizations

### (a) Gram scale reaction

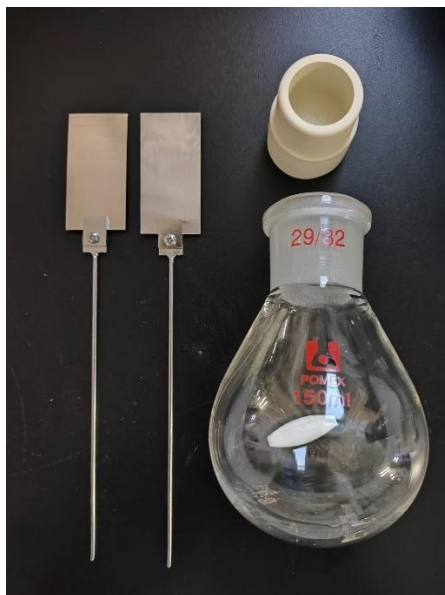

Figure S2. Electrolysis set-up for gram-scale experiment.

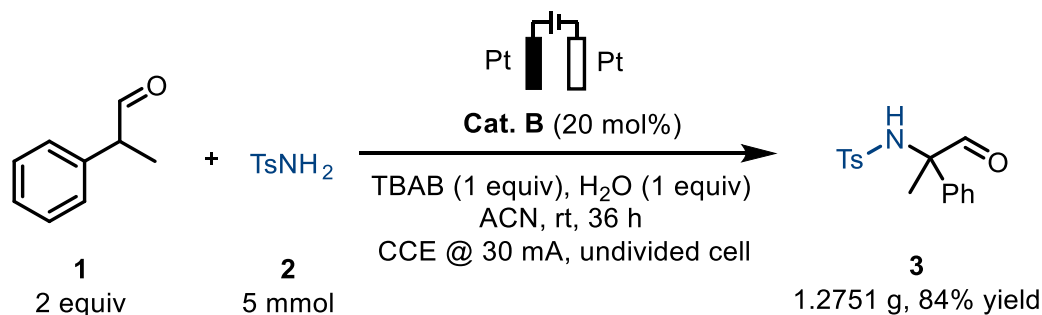

The electrocatalysis was carried out in an undivided cell with a platinum plate anode (20.0 mm × 50.0 mm × 0.2 mm) and a platinum plate cathode (20.0 mm × 50.0 mm × 0.2 mm). The dimensions of the platinum plate immersed in the reaction solution are approximately 20.0 mm × 20.0 mm. Under argon, to a 150 mL pre-dried undivided electrochemical cell equipped with a magnetic bar were added 4-methylbenzenesulfonamide **2** (857.0 mg, 5.0 mmol, 1.0 equiv), aminocatalyst **B** (247.0 mg, 1.0 mmol, 0.2 equiv), tetrabutylammonium bromide (1.6140 g, 5.0 mmol, 1.0 equiv), then H<sub>2</sub>O (5.0 mmol, 1.0 equiv, 90.0 μL), 2-phenylpropanal **1** (10.0 mmol, 2.0

equiv, 1.340 mL) and ACN (50.0 mL) were added. The electrocatalysis was performed at room temperature with a constant current of 30.0 mA maintained for 36 h. After the reaction was completed, the solution was concentrated and purified by silica gel flash column chromatography to afford the pure product (purified by flash column chromatography, eluent: *n*-hexane/ethyl acetate = 9/1, 1.2751 g, white solid, 84% yield). <sup>1</sup>H NMR (300 MHz, CDCl<sub>3</sub>) δ 9.14 (s, 1H), 7.36 (d, *J* = 8.3 Hz, 2H), 7.26-7.07 (m, 5H), 7.05 (d, *J* = 8.1 Hz, 2H), 6.02 (s, 1H), 2.34 (s, 3H), 1.87 (s, 3H) ppm. <sup>13</sup>C NMR (75 MHz, CDCl<sub>3</sub>) δ 194.3, 142.7, 139.0, 134.1, 129.1, 128.7, 128.5, 127.4, 126.5, 66.7, 21.3, 19.9 ppm.

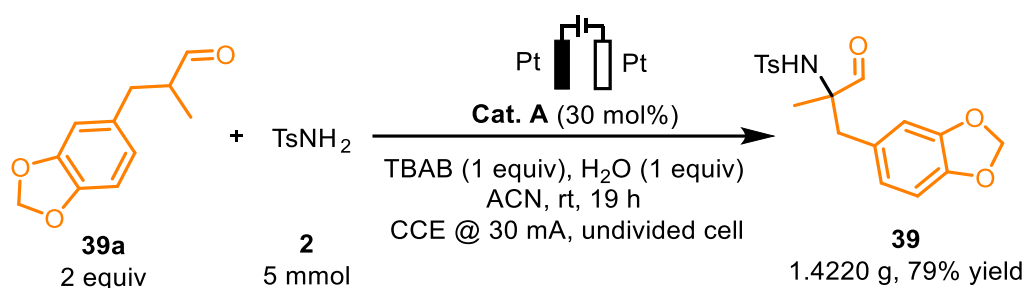

The electrocatalysis was carried out in an undivided cell with a platinum plate anode (20.0 mm × 50.0 mm × 0.2 mm) and a platinum plate cathode (20.0 mm × 50.0 mm × 0.2 mm). The dimensions of the platinum plate immersed in the reaction solution are approximately 20.0 mm × 20.0 mm. Under argon, to a 150 mL pre-dried undivided electrochemical cell equipped with a magnetic bar were added 4-methylbenzenesulfonamide **2** (855.0 mg, 5.0 mmol, 1.0 equiv), aminocatalyst **A** (298.0 uL, 1.5 mmol, 0.3 equiv), tetrabutylammonium bromide (1.6150 g, 5.0 mmol, 1.0 equiv), then H<sub>2</sub>O (5.0 mmol, 1.0 equiv, 90.0 uL), 3-(benzo[*d*][1,3]dioxol-5-yl)-2-methylpropanal (1.654 mL, 10.0 mmol, 2.0 equiv) and ACN (50.0 mL) were added. The electrocatalysis was performed at room temperature with a constant current of 30.0 mA maintained for 19 h. After the reaction was completed, the solution was concentrated and purified by silica gel flash column chromatography to afford the

pure product (purified by flash column chromatography, eluent: *n*-hexane/ethyl acetate = 6/1 to 4/1, 1.4220 g, colorless oil, 79% yield).

$^1\text{H NMR}$  (300 MHz,  $\text{CDCl}_3$ )  $\delta$  9.45 (s, 1H), 7.73 (d,  $J = 8.3$  Hz, 2H), 7.27 (d,  $J = 8.1$  Hz, 2H), 6.71 (d,  $J = 7.8$  Hz, 1H), 6.63-6.55 (m, 2H), 5.92 (s, 2H), 5.29 (s, 1H), 3.01 (d,  $J = 14.1$  Hz, 1H), 2.95 (d,  $J = 14.1$  Hz, 1H), 2.41 (s, 3H), 1.26 (s, 3H) ppm.

$^{13}\text{C NMR}$  (75 MHz,  $\text{CDCl}_3$ )  $\delta$  199.6, 147.7, 146.9, 143.4, 139.7, 129.6, 127.4, 126.7, 123.6, 110.6, 108.3, 101.1, 65.6, 42.7, 21.4, 19.7 ppm.

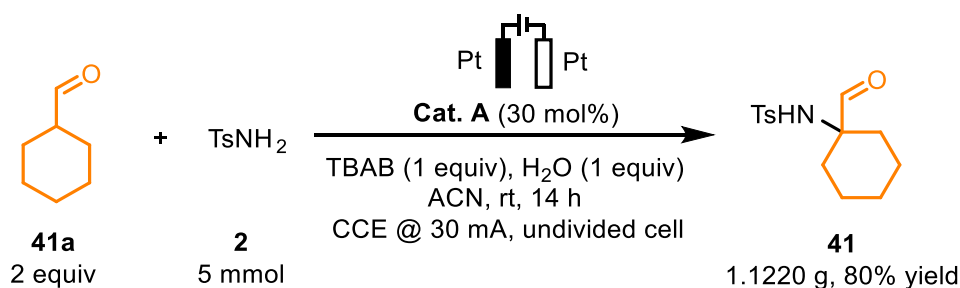

The electrocatalysis was carried out in an undivided cell with a platinum plate anode (20.0 mm × 50.0 mm × 0.2 mm) and a platinum plate cathode (20.0 mm × 50.0 mm × 0.2 mm). The dimensions of the platinum plate immersed in the reaction solution are approximately 20.0 mm × 20.0 mm. Under argon, to a 150 mL pre-dried undivided electrochemical cell equipped with a magnetic bar were added 4-methylbenzenesulfonamide **2** (858.0 mg, 5.0 mmol, 1.0 equiv), aminocatalyst **A** (298.0  $\mu\text{L}$ , 1.5 mmol, 0.3 equiv), tetrabutylammonium bromide (1.6170 g, 5.0 mmol, 1.0 equiv), then H<sub>2</sub>O (5.0 mmol, 1.0 equiv, 90.0  $\mu\text{L}$ ), cyclohexanecarbaldehyde (1.210 mL, 10.0 mmol, 2.0 equiv) and ACN (50.0 mL) were added. The electrocatalysis was performed at room temperature with a constant current of 30.0 mA maintained for 14 h. After the reaction was completed, the solution was concentrated and purified by silica gel flash column chromatography to afford the pure product (purified by flash column chromatography, eluent: *n*-hexane/ethyl acetate = 9/1 to 6/1, 1.2200 g, white solid, 80% yield).

$^1\text{H NMR}$  (300 MHz,  $\text{CDCl}_3$ )  $\delta$  9.61 (s, 1H), 7.82 (d,  $J = 8.3$  Hz, 2H), 7.31 (d,  $J = 8.1$  Hz,

2H), 5.90 (s, 1H), 2.43 (s, 3H), 1.74-1.55 (m, 4H), 1.51-1.35 (m, 3H), 1.31-1.12 (m, 3H) ppm.

$^{13}\text{C}$  NMR (75 MHz,  $\text{CDCl}_3$ )  $\delta$  201.0, 143.5, 139.2, 129.6, 126.8, 65.2, 29.9, 24.6, 21.5, 20.5 ppm.

### (b) Synthetic transformations

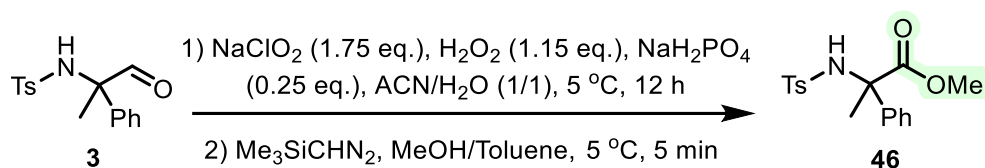

#### Methyl 2-((4-methylphenyl)sulfonamido)-2-phenylpropanoate (**46**)

To a solution of **3** (0.455 g, 1.50 mmol, 1.0 equiv) in ACN (5 mL) was added an aqueous solution of  $\text{NaH}_2\text{PO}_4$  (0.05 g, 0.42 mmol, 0.25 equiv) in water (2 mL), follow by 35%  $\text{H}_2\text{O}_2$  (140.0.  $\mu\text{L}$ ). Subsequently, an aqueous solution of  $\text{NaClO}_2$  (0.2270 g, 2.60 mmol, 1.75 equiv) in water (3 mL) was added dropwise to the resulting mixture, keeping the temperature of the mixture at  $5\text{ }^\circ\text{C}$ . After the mixture was stirred for 12 h,  $\text{Na}_2\text{SO}_3$  (0.0301 g) was added and the resulting mixture was acidified (pH = 2-3) with 10% aqueous hydrochloric acid. The reaction mixture was extracted with DCM (20 mL $\times$ 3). The combined organic layers were washed with brine (10 mL), dried over  $\text{Na}_2\text{SO}_4$ , and concentrated. Then the residue was dissolved in toluene/methanol 1: 2 and treated with trimethylsilyldiazomethane (0.8 mL) at  $0\text{ }^\circ\text{C}$  for 5 min until bubbling subsided. The excess trimethylsilyldiazomethane was quenched with a few drops of acetic acid and the solution was concentrated and purified by silica gel flash column chromatography to afford the pure product. (purified by flash column chromatography, eluent: *n*-hexane/ethyl acetate = 10/1, 0.4400 g, white solid, 88% yield). The NMR data are in consistent with the reported literature.<sup>[2]</sup>

$^1\text{H}$  NMR (300 MHz,  $\text{CDCl}_3$ )  $\delta$  7.50 (d,  $J$  = 8.2 Hz, 2H), 7.29-7.08 (m, 7H), 5.99 (s, 1H), 3.64 (s, 3H), 2.36 (s, 3H), 1.91 (s, 3H) ppm.

$^{13}\text{C}$  NMR (75 MHz,  $\text{CDCl}_3$ )  $\delta$  173.3, 142.8, 139.3, 139.0, 129.2, 128.4, 128.0, 126.8, 125.8, 64.3, 53.2, 23.7, 21.3 ppm.

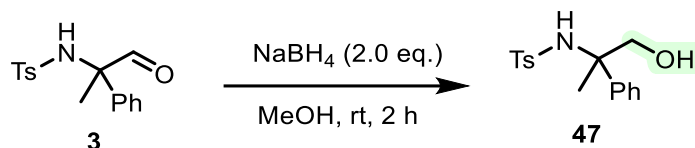

To a solution of **3** (61.0 mg, 0.2 mmol, 1.0 equiv) in MeOH (2 mL) was added sodium borohydride (15.0 mg, 0.4 mmol, 2.0 equiv). The reaction mixture was stirred at room temperature for 2 h. After the completion of the reaction determined by TLC, the reaction mixture was quenched by water (5 mL) and extracted with DCM (20 mL $\times$ 3). The combined organic layers were washed with brine (10 mL), dried over  $\text{Na}_2\text{SO}_4$ , and concentrated. The residue was purified by silica gel flash column chromatography (eluent: petroleum ether/ethyl acetate = 5/1 to 3/1, white solid, 48.9 mg, 80% yield) to give **N-(1-Hydroxy-2-phenylpropan-2-yl)-4-methylbenzenesulfonamide (47)**.

$^1\text{H}$  NMR (300 MHz,  $\text{CDCl}_3$ )  $\delta$  7.61 (d,  $J$  = 8.2 Hz, 2H), 7.37-7.13 (m, 7H), 5.52 (s, 1H), 3.86 (d,  $J$  = 11.4 Hz, 1H), 3.65 (d,  $J$  = 11.3 Hz, 1H), 2.39 (s, 3H), 2.25 (s, 1H), 1.56 (s, 3H) ppm.

$^{13}\text{C}$  NMR (75 MHz,  $\text{CDCl}_3$ )  $\delta$  143.0, 141.8, 139.5, 129.4, 128.4, 127.4, 126.9, 126.1, 70.3, 62.4, 23.2, 21.4 ppm.

HRMS (ESI)  $m/z$  Calcd for  $\text{C}_{16}\text{H}_{19}\text{NNaO}_3\text{S}$  [ $\text{M}^+\text{+Na}$ ]: 328.0978, Found: 328.0977.

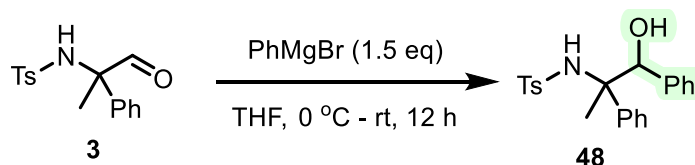

At 0 °C, to a solution of **3** (121.0 mg, 0.4 mmol, 1.0 equiv) in anhydrous THF (2 mL) was added PhMgBr (0.6 mL, 0.6 mmol, 1.0 mol/L in THF, 1.5 equiv) under argon. The reaction mixture was warmed up to room temperature naturally and stirred for 12 h. After the completion of the reaction determined by TLC, the reaction mixture was

quenched by saturated aqueous solution of  $\text{NH}_4\text{Cl}$  (5 mL) and extracted with EA (10 mL $\times$ 3). The combined organic layers were washed with brine (10 mL), dried over  $\text{Na}_2\text{SO}_4$ , and concentrated. The residue was purified by silica gel flash column chromatography (eluent: *n*-hexane /ethyl acetate = 7/1, white solid, 123.1 mg, 81% yield, dr: about 1/1) to give ***N*-(1-Hydroxy-1,2-diphenylpropan-2-yl)-4-methylbenzenesulfonamide (48)**.

$^1\text{H NMR}$  (300 MHz,  $\text{CDCl}_3$ )  $\delta$  7.54 (d,  $J = 8.2$  Hz, 1H), 7.39 (d,  $J = 8.2$  Hz, 1H), 7.32-7.25 (m, 1H), 7.23-7.01 (m, 9H), 6.97 (d,  $J = 7.1$  Hz, 1H), 6.75 (d,  $J = 7.3$  Hz, 1H), [5.95 (s, 0.45H), 5.82 (s, 0.50H), 1H], [4.83 (s, 0.50H), 4.77 (s, 0.45H), 1H], [2.66 (s, 0.50H), 2.57 (s, 0.45H), 1H], [2.35 (s, 1.5 H), 2.33 (s, 1.4H), 3H], [1.59 (s, 1.56H), 1.47 (s, 1.39H), 3H] ppm.  
 $^{13}\text{C NMR}$  (75 MHz,  $\text{CDCl}_3$ )  $\delta$  142.8, 142.5, 141.8, 139.8, 139.5, 139.4, 138.1, 129.2, 129.0, 128.1, 128.0, 127.9, 127.6, 127.54, 127.51, 127.48, 127.4, 127.3, 127.2, 127.0, 126.9, 126.7, 81.2, 80.9, 65.1, 64.3, 21.6, 21.38, 21.36, 19.7 ppm.

**HRMS** (ESI)  $m/z$  Calcd for  $\text{C}_{22}\text{H}_{23}\text{NNaO}_3\text{S}$  [ $\text{M}^+\text{Na}$ ]: 404.1291, Found: 404.1293.

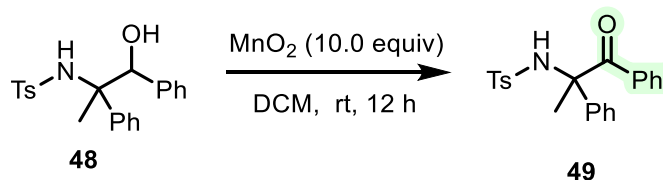

To a solution of **48** (76.4 mg, 0.2 mmol, 1.0 equiv) in DCM (2 mL) was added  $\text{MnO}_2$  (174.0 mg, 2.0 mmol, 10.0 equiv). The reaction mixture was stirred at room temperature for 12 h. After the completion of the reaction determined by TLC. Upon completion, the reaction mixture was filtered through a pad of celite, the residue was washed with EA (15 mL $\times$ 3), the filtrate was combined and concentrated. The residue was purified by silica gel flash column chromatography (eluent: petroleum ether/ethyl acetate = 12/1 to 10/1, white solid, 48.9 mg, 76% yield) to give **4-Methyl-N-(1-oxo-1,2-diphenylpropan-2-yl)benzenesulfonamide (49)**.

$^1\text{H NMR}$  (300 MHz,  $\text{CDCl}_3$ )  $\delta$  7.42-7.34 (m, 3H), 7.24-7.12 (m, 7H), 7.11-7.02 (m, 2H), 6.93 (d,  $J = 8.1$  Hz, 2H), 6.82 (s, 1H), 2.30 (s, 3H), 2.15 (s, 3H) ppm.

$^{13}\text{C}$  NMR (75 MHz,  $\text{CDCl}_3$ )  $\delta$  197.5, 141.9, 139.4, 136.6, 133.2, 132.8, 130.0, 128.8, 128.6, 128.3, 128.2, 127.5, 126.3, 67.3, 24.9, 21.3 ppm.

HRMS (ESI)  $m/z$  Calcd for  $\text{C}_{22}\text{H}_{21}\text{NNaO}_3\text{S}$  [ $\text{M}^+\text{Na}$ ]: 402.1134, Found: 402.1136.

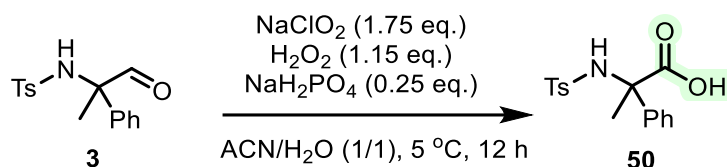

### 2-((4-Methylphenyl)sulfonamido)-2-phenylpropanoic acid (**50**)

To a solution of **3** (60.9 mg, 0.2 mmol, 1.0 equiv) in ACN (1 mL) was added an aqueous solution of  $\text{NaH}_2\text{PO}_4$  (6.0 mg, 0.05 mmol, 0.25 equiv) in water (0.5 mL), followed by 35%  $\text{H}_2\text{O}_2$  (1.5  $\mu\text{L}$ ). Subsequently, an aqueous solution of  $\text{NaClO}_2$  (26.2 mg, 0.35 mmol, 1.75 equiv) in water (0.5 mL) was added dropwise to the resulting mixture, keeping the temperature of the mixture at 5 °C. After the mixture was stirred for 12 h,  $\text{Na}_2\text{SO}_3$  (10.0 mg) was added and the resulting mixture was acidified (pH = 2-3) with 10% aqueous hydrochloric acid. The reaction mixture was extracted with DCM (10 mL $\times$ 3). The combined organic layers were washed with brine (10 mL), dried over  $\text{Na}_2\text{SO}_4$ , and concentrated. The residue was purified by silica gel flash column chromatography (eluent: petroleum ether/ethyl acetate = 2/1 to 1/1, white solid, 58.1 mg, 91% yield).

$^1\text{H}$  NMR (300 MHz,  $\text{DMSO}-d_6$ )  $\delta$  8.04 (s, 1H), 7.59 (d,  $J$  = 7.8 Hz, 2H), 7.42-7.12 (m, 8H), 2.35 (s, 3H), 1.68 (s, 3H) ppm.

$^{13}\text{C}$  NMR (75 MHz,  $\text{DMSO}-d_6$ )  $\delta$  173.5, 142.0, 141.0, 140.6, 129.2, 127.9, 127.4, 126.3, 126.1, 63.8, 24.2, 21.0 ppm.

HRMS (ESI)  $m/z$  Calcd for  $\text{C}_{16}\text{H}_{17}\text{NO}_4\text{S}$  [ $\text{M}^+\text{Na}$ ]: 342.0770, Found: 342.0774.

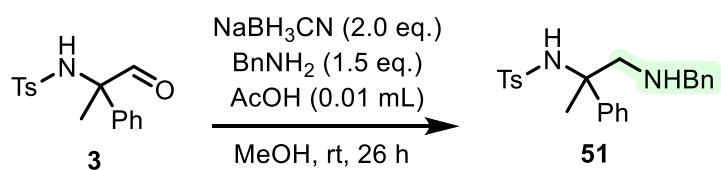

To a solution of **3** (60.7 mg, 0.2 mmol, 1.0 equiv) in MeOH (2 mL) was added Benzylamine (32.0 mg, 0.3 mmol, 1.5 equiv). After stirring the reaction mixture at room temperature for 20 minutes, adjust the pH to 6 using 0.1 mL of acetic acid, then add sodium cyanoborohydride (25.0 mg, 0.4 mmol, 2.0 equiv). After the completion of the reaction determined by TLC, the reaction mixture was quenched by water (5 mL) and extracted with DCM (20 mL×3). The combined organic layers were washed with brine (10 mL), dried over Na<sub>2</sub>SO<sub>4</sub>, and concentrated. The residue was purified by silica gel flash column chromatography (eluent: petroleum ether/ethyl acetate = 6/1 to 5/1) to give ***N*-(1-(benzylamino)-2-phenylpropan-2-yl)-4-methylbenzenesulfonamide (51)** (white oil, 67.2 mg, 85% yield).

<sup>1</sup>H NMR (300 MHz, CDCl<sub>3</sub>) δ 7.53 (d, *J* = 8.0 Hz, 2H), 7.44-7.09 (m, 12H), 6.32 (s, 1H), 3.71 (d, *J* = 13.4 Hz, 1H), 3.62 (d, *J* = 13.4 Hz, 1H), 2.90 (d, *J* = 11.9 Hz, 1H), 2.54 (d, *J* = 11.9 Hz, 1H), 2.37 (s, 3H), 1.51 (s, 3H), 1.26 (s, 1H) ppm.

<sup>13</sup>C NMR (75 MHz, CDCl<sub>3</sub>) δ 143.5, 142.4, 140.5, 139.6, 129.2, 128.5, 128.2, 128.1, 127.2, 126.9, 126.6, 125.8, 60.6, 60.0, 53.4, 24.0, 21.4 ppm.

HRMS (ESI) *m/z* Calcd for C<sub>23</sub>H<sub>27</sub>N<sub>2</sub>O<sub>2</sub>S [M<sup>+</sup>+H]: 395.1788, Found: 395.1788.

## V. Mechanistic Studies

### Cyclic voltammetry studies

The cyclic voltammetry was carried out with a Shanghai Chenhua CHI630E workstation in 10 mL electrolytic cell (inner diameter 26 mm). A glassy-carbon electrode (3 mm-diameter, disc-electrode) was used as the working electrode, a Pt plate (10 mm × 10 mm × 0.1 mm) was used as the auxiliary electrode and an Ag/AgCl electrode was used as a reference electrode. The sample should be bubbled with Ar for 5 min before testing. The measurements were carried out at a scan rate of 100 mV s<sup>-1</sup> in ACN/<sup>n</sup>Bu<sub>4</sub>NBF<sub>4</sub> (0.1 M).

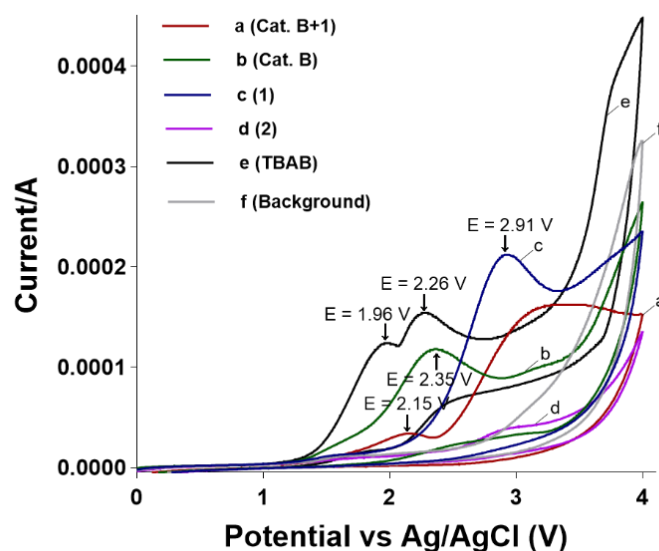

Figure S3. Cyclic voltammograms of **1** and related compounds in 0.1 M ACN/<sup>n</sup>Bu<sub>4</sub>NBF<sub>4</sub> using a glass-carbon working electrode, Pt plate, and Ag/AgCl as counter and reference electrodes at 100 mV s<sup>-1</sup> scan rate. (a) Cat. **B** (0.002 M) and **1** (0.01M), (b) Cat. **B** (0.01 M), (c) **1** (0.01 M), (d) **2** (0.01 M), (e) TBAB (0.01 M), (f) Background.

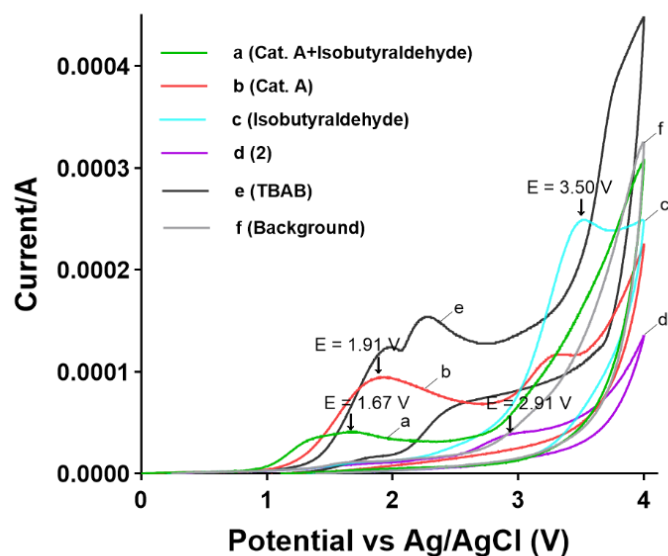

Figure S4. Cyclic voltammograms of Isobutyraldehyde and related compounds in 0.1 M ACN/*n*Bu<sub>4</sub>NBF<sub>4</sub> using a glass-carbon working electrode, Pt plate, and Ag/AgCl as counter and reference electrodes at 100 mV s<sup>-1</sup> scan rate. (a) Cat. A (0.002 M) and Isobutyraldehyde (0.01 M), (b) Cat. A (0.01 M), (c) Isobutyraldehyde (0.01 M), (d) 2 (0.01M), (e) TBAB (0.01 M), (f) Background.

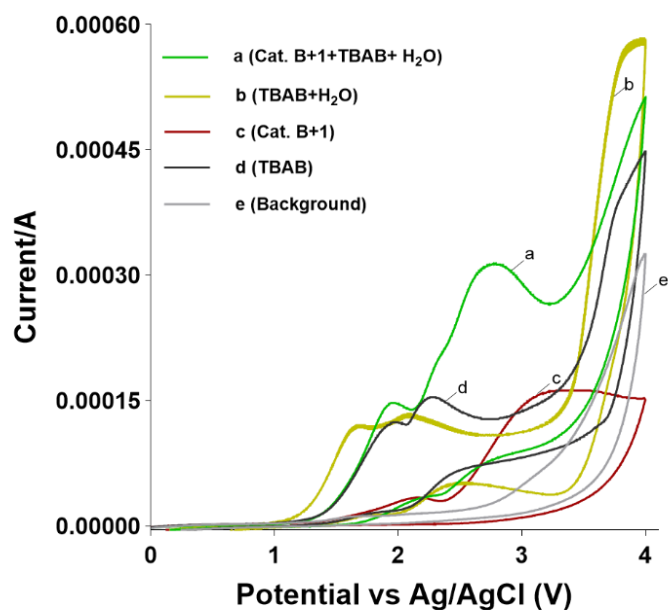

Figure S5. Cyclic voltammograms of **1** and related compounds in 0.1 M ACN/ $n$ Bu<sub>4</sub>NBF<sub>4</sub> using a glass-carbon working electrode, Pt plate, and Ag/AgCl as counter and reference electrodes at 100 mV s<sup>-1</sup> scan rate. (a) Cat. **B** (0.002 M), **1** (0.01 M), TBAB (0.01 M) and H<sub>2</sub>O (0.01 M), (b) TBAB (0.01 M) and H<sub>2</sub>O (0.01 M), (c) Cat. **B** (0.002 M) and **1** (0.01 M), (d) TBAB (0.01 M), (e) Background.

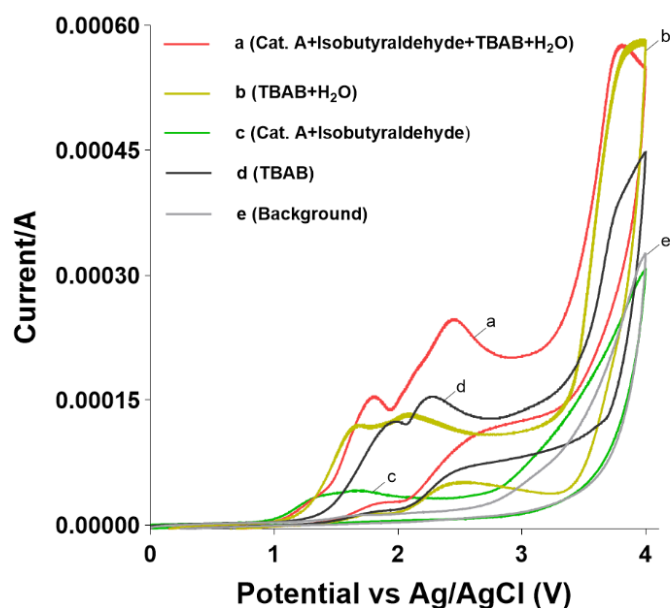

Figure S6. Cyclic voltammograms of Isobutyraldehyde and related compounds in 0.1 M ACN/ $n$ Bu<sub>4</sub>NBF<sub>4</sub> using a glass-carbon working electrode, Pt plate, and Ag/AgCl as counter and reference electrodes at 100 mV s<sup>-1</sup> scan rate. (a) Cat. **A** (0.002 M), Isobutyraldehyde (0.01 M), TBAB (0.01 M) and H<sub>2</sub>O (0.01 M), (b) TBAB (0.01 M) and H<sub>2</sub>O (0.01 M), (c) Cat. **A** (0.002 M) and Isobutyraldehyde (0.01 M), (d) TBAB (0.01 M), (e) Background.

## Control experiments with Br<sub>2</sub> and NBS

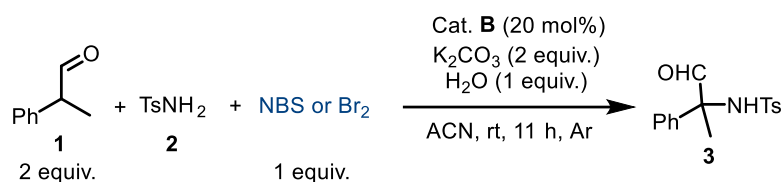

| Entry | [Br]            | K <sub>2</sub> CO <sub>3</sub> | H <sub>2</sub> O | Yield of <b>3</b> (%) <sup>a</sup> | Recovery of <b>2</b> (%) <sup>a</sup> |
|-------|-----------------|--------------------------------|------------------|------------------------------------|---------------------------------------|
| 1     | NBS             | x                              | x                | 0                                  | 72                                    |
| 2     | NBS             | √                              | x                | 0                                  | 10                                    |
| 3     | NBS             | x                              | √                | 0                                  | 72                                    |
| 4     | NBS             | √                              | √                | 35                                 | 22                                    |
| 5     | Br <sub>2</sub> | x                              | x                | 0                                  | 66                                    |
| 6     | Br <sub>2</sub> | √                              | x                | 2                                  | 46                                    |
| 7     | Br <sub>2</sub> | x                              | √                | 0                                  | 62                                    |
| 8     | Br <sub>2</sub> | √                              | √                | 3                                  | 44                                    |

<sup>a</sup> Determined by NMR using mesitylene as the internal standard

To a solution of **1** (53.5 uL, 0.4 mmol, 2.0 equiv, d = 1.002 g/mL), **2** (34.2 mg, 0.2 mmol, 1.0 equiv), Cat. **B** (9.8 mg, 0.04 mmol, 0.2 equiv), K<sub>2</sub>CO<sub>3</sub> (56.0 mg, 0.4 mmol, 2.0 equiv), H<sub>2</sub>O (3.6 uL, 0.2 mmol, 1.0 equiv) in ACN (2 mL) was added Br<sub>2</sub> (10.0 uL, 0.2 mmol, 1.0 equiv) or NBS (35.6 mg, 0.2 mmol, 1.0 equiv) or under argon. The reaction was stirred at room temperature for 11 h, then the reaction mixture was filtered through a short pad of silica gel and washed with EA (20 mL×3). After concentrated, a crude NMR analysis was conducted with 14 μL of mesitylene as internal standard.

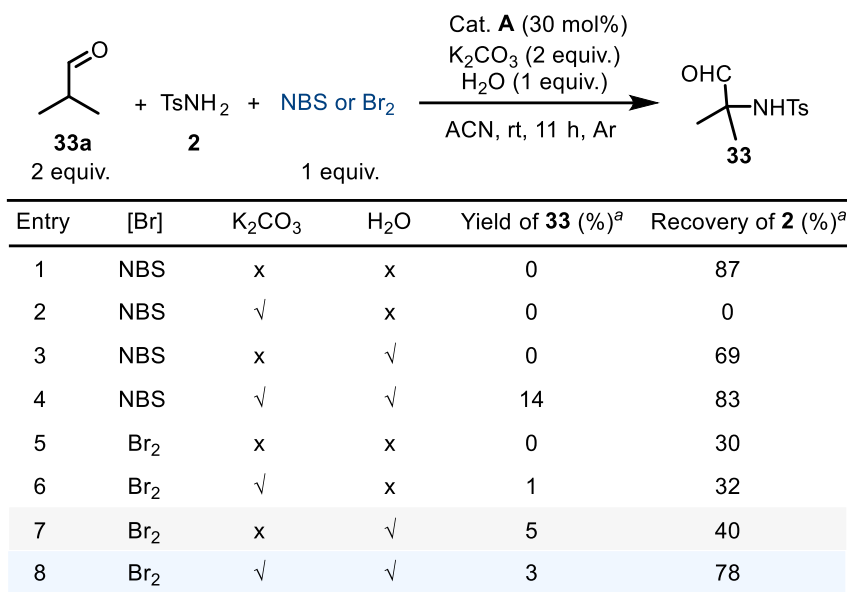

<sup>a</sup> Determined by NMR using mesitylene as the internal standard

To a solution of isobutyraldehyde (28.8 mg, 0.4 mmol, 2.0 equiv), **2** (34.2 mg, 0.2 mmol, 1.0 equiv), Cat. **A** (12.0 μL, 0.06 mmol, 0.3 equiv, d = 0.912 g/mL), K<sub>2</sub>CO<sub>3</sub> (56.0 mg, 0.4 mmol, 2.0 equiv), H<sub>2</sub>O (3.6 uL, 0.2 mmol, 1.0 equiv) in ACN (2 mL) was added Br<sub>2</sub> (10.0 uL, 0.2 mmol, 1.0 equiv) or NBS (35.6 mg, 0.2 mmol, 1.0 equiv) under argon. The reaction was stirred at room temperature for 11 h, then the reaction mixture was filtered through a short pad of silica gel and washed with EA (20 mL×3). After concentrated, a crude NMR analysis was conducted with 14 μL of mesitylene as internal standard.

### Control experiment with α-bromoaldehyde

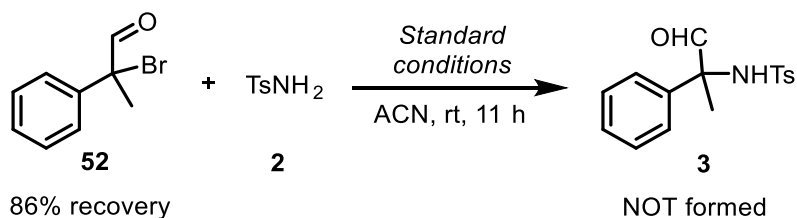

Under argon, to a 10 mL pre-dried undivided electrochemical cell equipped with a magnetic bar were added 2-bromo-2-phenylpropanal **52**<sup>[3]</sup> (85.1 mg, 0.4 mmol, 2.0 equiv), **2** (34.3 mg, 0.2 mmol, 1.0 equiv), Cat. **B** (9.8 mg, 0.04 mmol, 0.2 equiv), TBAB (64.5 mg, 0.2 mmol, 1.0 equiv), and H<sub>2</sub>O (3.6  $\mu$ L, 0.2 mmol, 1.0 equiv, d = 1.000 g/mL) in ACN (2 mL) according to the General Procedure I. The electrocatalysis was performed at room temperature for 11 h, then the reaction mixture was filtered through a short pad of silica gel and washed with EA (20 mL $\times$ 3). After concentrated, a crude NMR analysis was conducted with 14  $\mu$ L of mesitylene as internal standard. As a result, **3** was not found, the recovery of **52** was calculated to be 86%.

### Hammett analysis

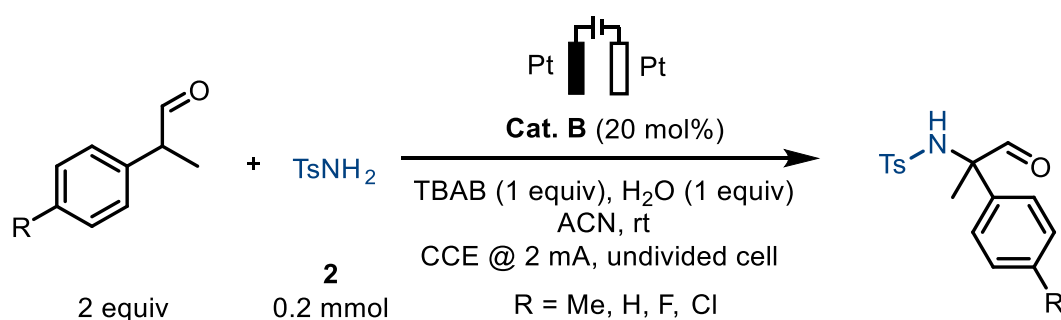

The electrocatalysis was carried out in an undivided cell with a platinum plate anode (10.0 mm  $\times$  15.0 mm  $\times$  0.2 mm) and a platinum plate cathode (10.0 mm  $\times$  15.0 mm  $\times$  0.2 mm). Under argon, to a 10 mL pre-dried undivided electrochemical cell equipped with a magnetic bar were added **2** (34.2 mg, 0.2 mmol, 1.0 equiv), racemic aminocatalyst **B** (9.85 mg, 0.04 mmol, 0.2 equiv), tetrabutylammonium bromide (64.5 mg, 0.2 mmol, 1.0 equiv). Then H<sub>2</sub>O (0.2 mmol, 1.0 equiv, 3.6  $\mu$ L), aldehyde (0.4 mmol, 2.0 equiv), and ACN (2 mL) were added. The electrocatalysis was performed at room temperature with a constant current of 2.0 mA maintained for 0.33-1.67 h. The crude reaction mixture was concentrated, and Mesitylene (14.0  $\mu$ L, 0.1 mmol) was added.

[3] G. Hutchinson, C. Alamillo-Ferrer, M. Fernández-Pascual and J. Burés, *J. Org. Chem.*, 2022, **87**, 7968–7974.

The yield dependence on substituent R and time was measured by  $^1\text{H}$  NMR and is listed in the following table.

| Time (h) | Yield (4-Me) |
|----------|--------------|
| 0.33     | 2%           |
| 0.67     | 5%           |
| 1        | 11%          |
| 1.33     | 18%          |
| 1.67     | 24% (delete) |

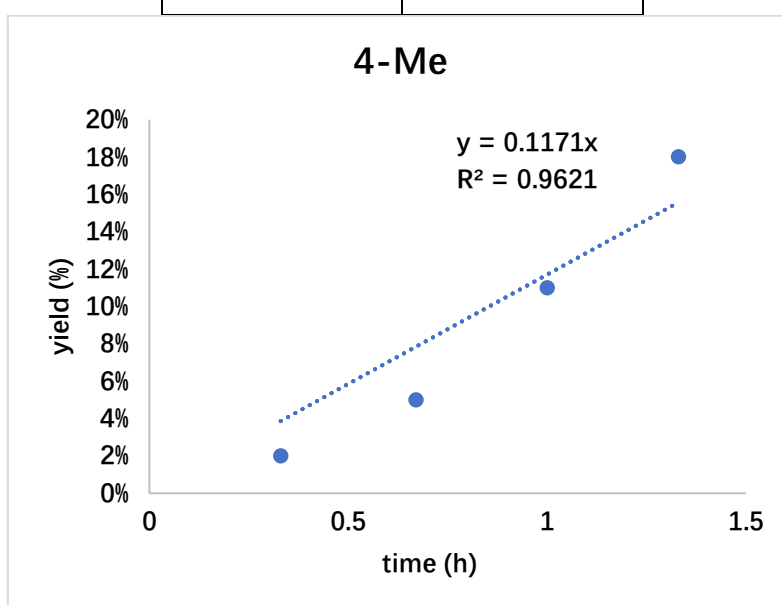

| Time (h) | Yield (H) |
|----------|-----------|
| 0.33     | 1%        |
| 0.67     | 3%        |
| 1        | 6%        |
| 1.33     | 9%        |
| 1.67     | 13%       |

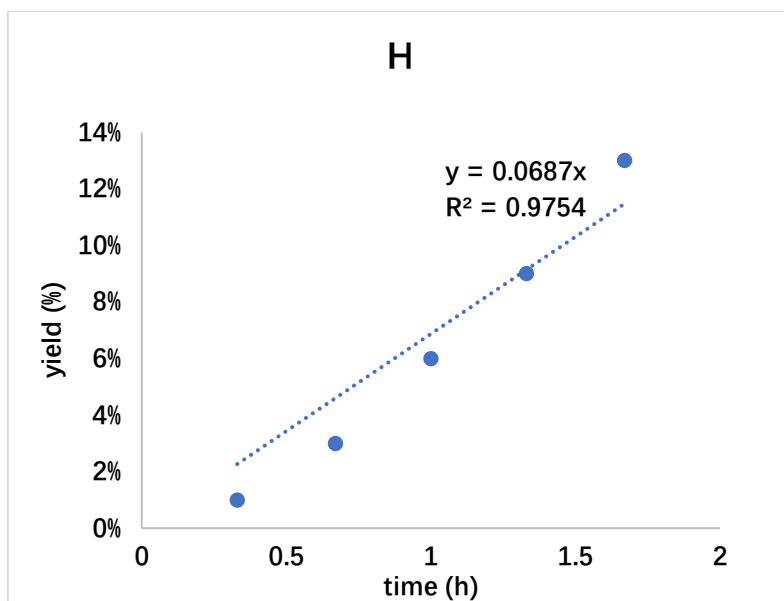

| Time (h) | Yield (4-F) |
|----------|-------------|
| 0.33     | 4%          |
| 0.67     | 5%          |
| 1        | 8%          |
| 1.33     | 10%         |
| 1.67     | 12%         |

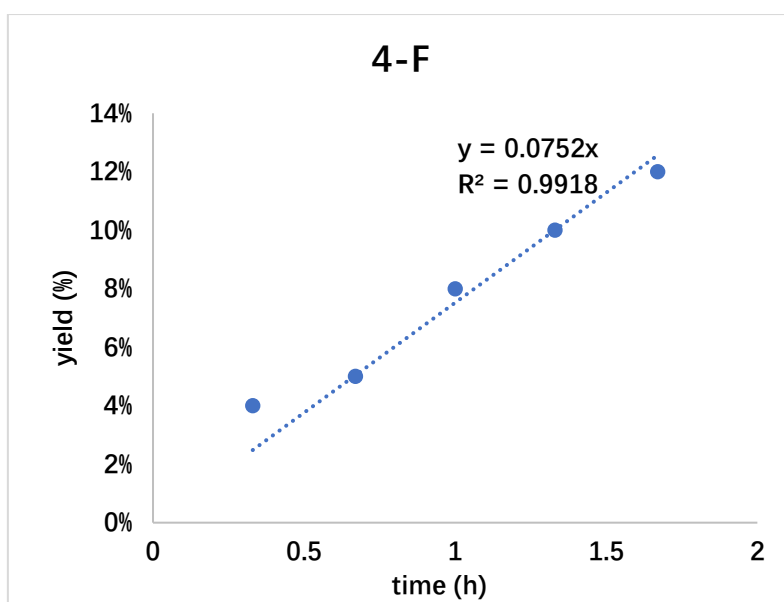

| Time (h) | Yield (4-Cl) |
|----------|--------------|
| 0.33     | 2%           |
| 0.67     | 5%           |
| 1        | 6%           |
| 1.33     | 8%           |
| 1.67     | 9%           |

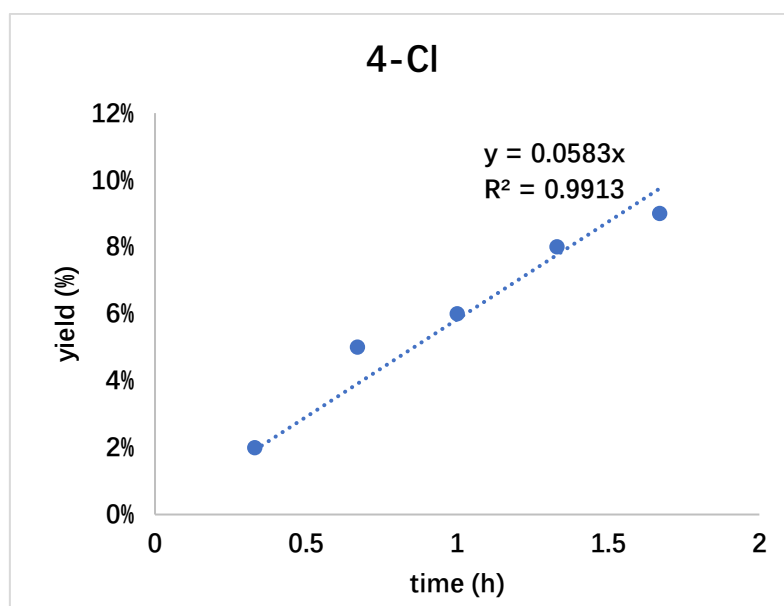

|                       |        |   |       |        |
|-----------------------|--------|---|-------|--------|
| R                     | 4-Me   | H | 4-F   | 4-Cl   |
| $\sigma^+$            | -0.31  | 0 | -0.07 | 0.11   |
| $K_R/K_H$             | 1.7045 | 1 | 1.095 | 0.8486 |
| $\text{Log}(K_R/K_H)$ | 0.232  | 0 | 0.039 | -0.071 |

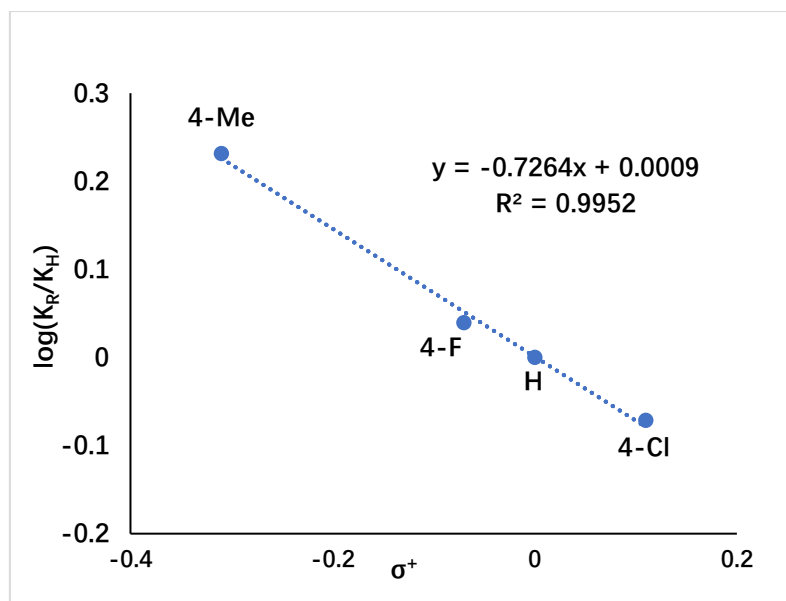

## VI. NMR Spectra

$^1\text{H}$  NMR spectrum of compound **3** (300 MHz,  $\text{CDCl}_3$ )

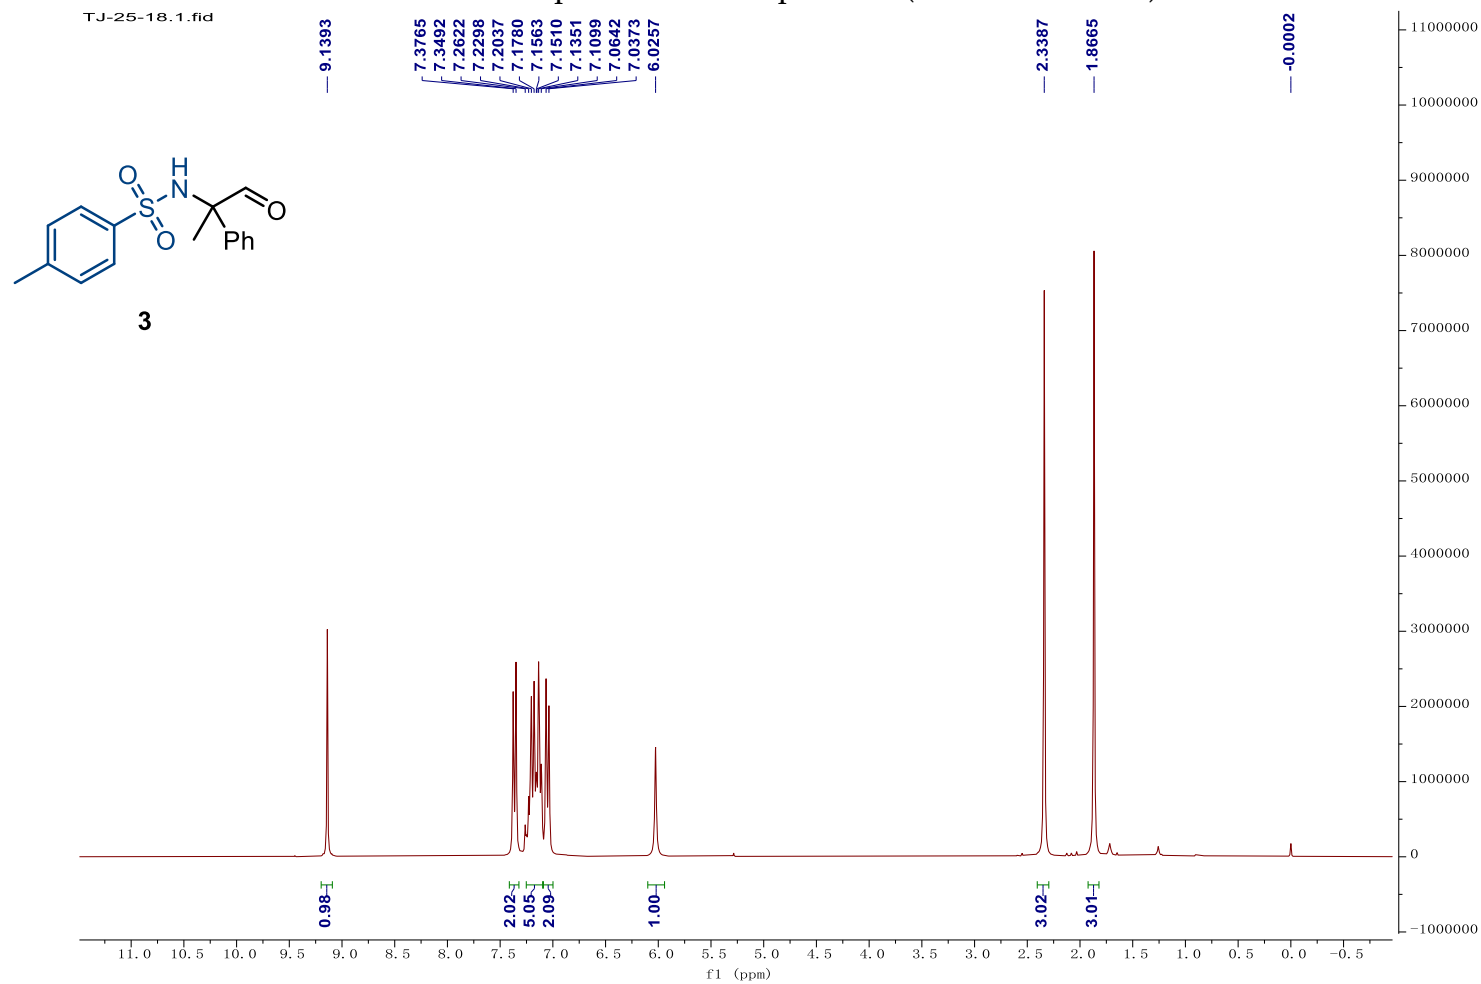

<sup>13</sup>C NMR spectrum of compound 3 (75 MHz, CDCl<sub>3</sub>)

TJ-25-18.2.fid

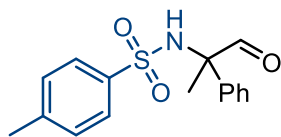

3

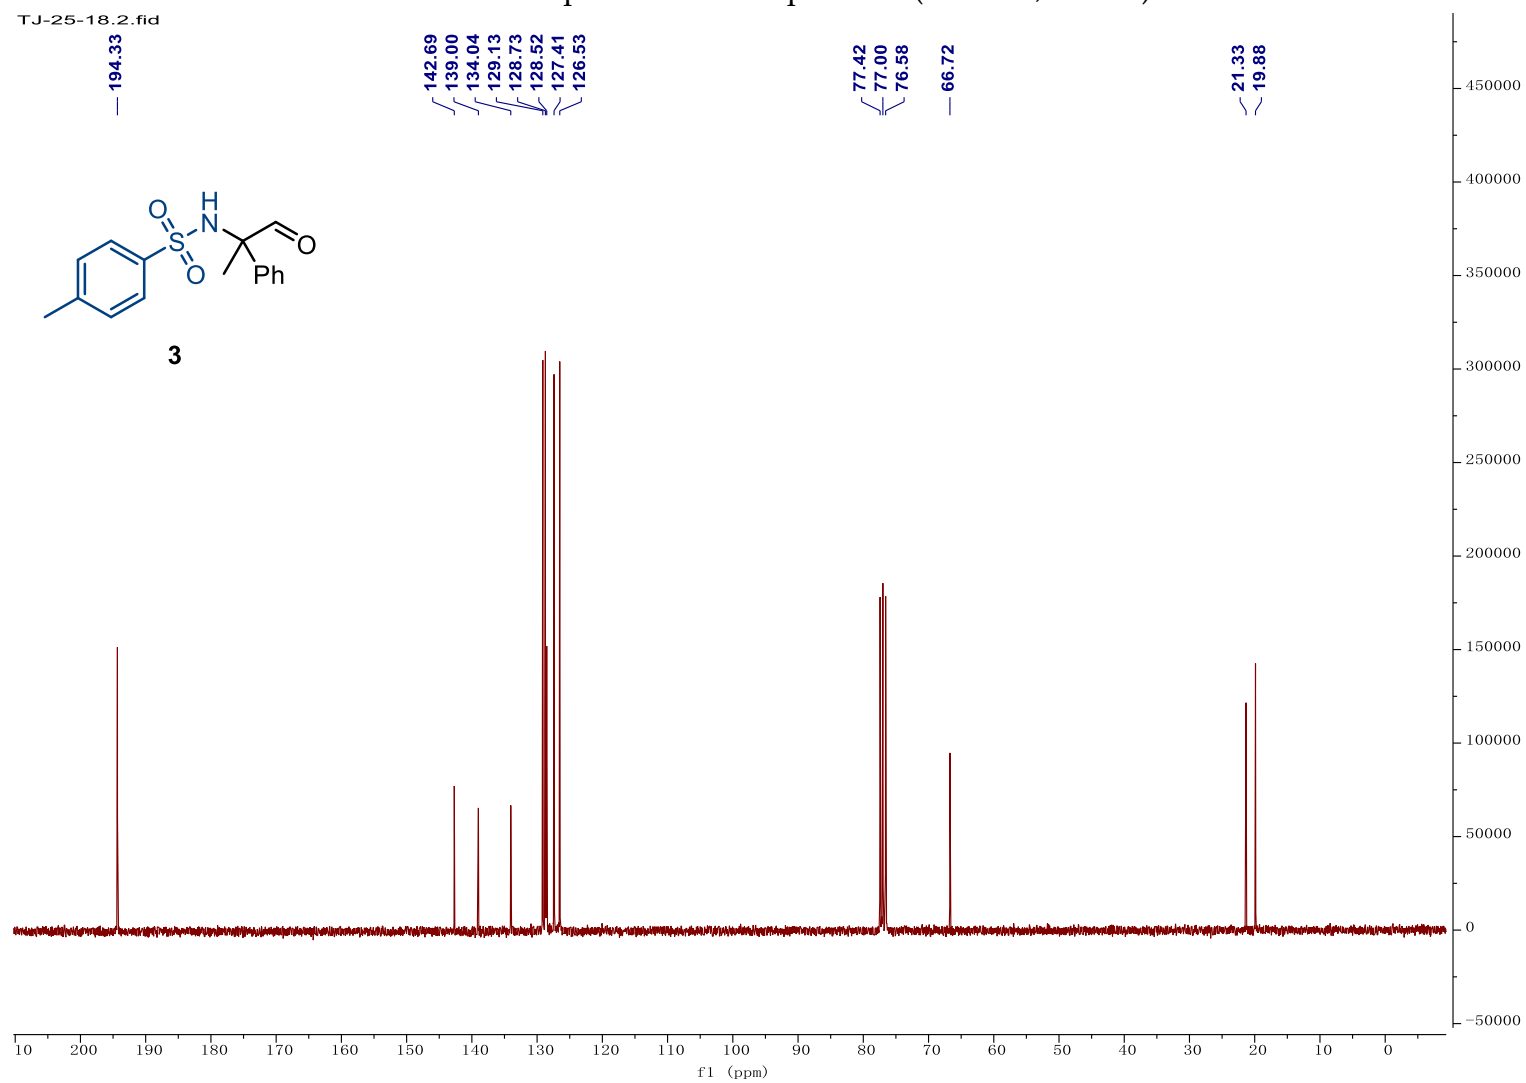

<sup>1</sup>H NMR spectrum of compound 4 (300 MHz, CDCl<sub>3</sub>)

TJ-24-56.7.fid

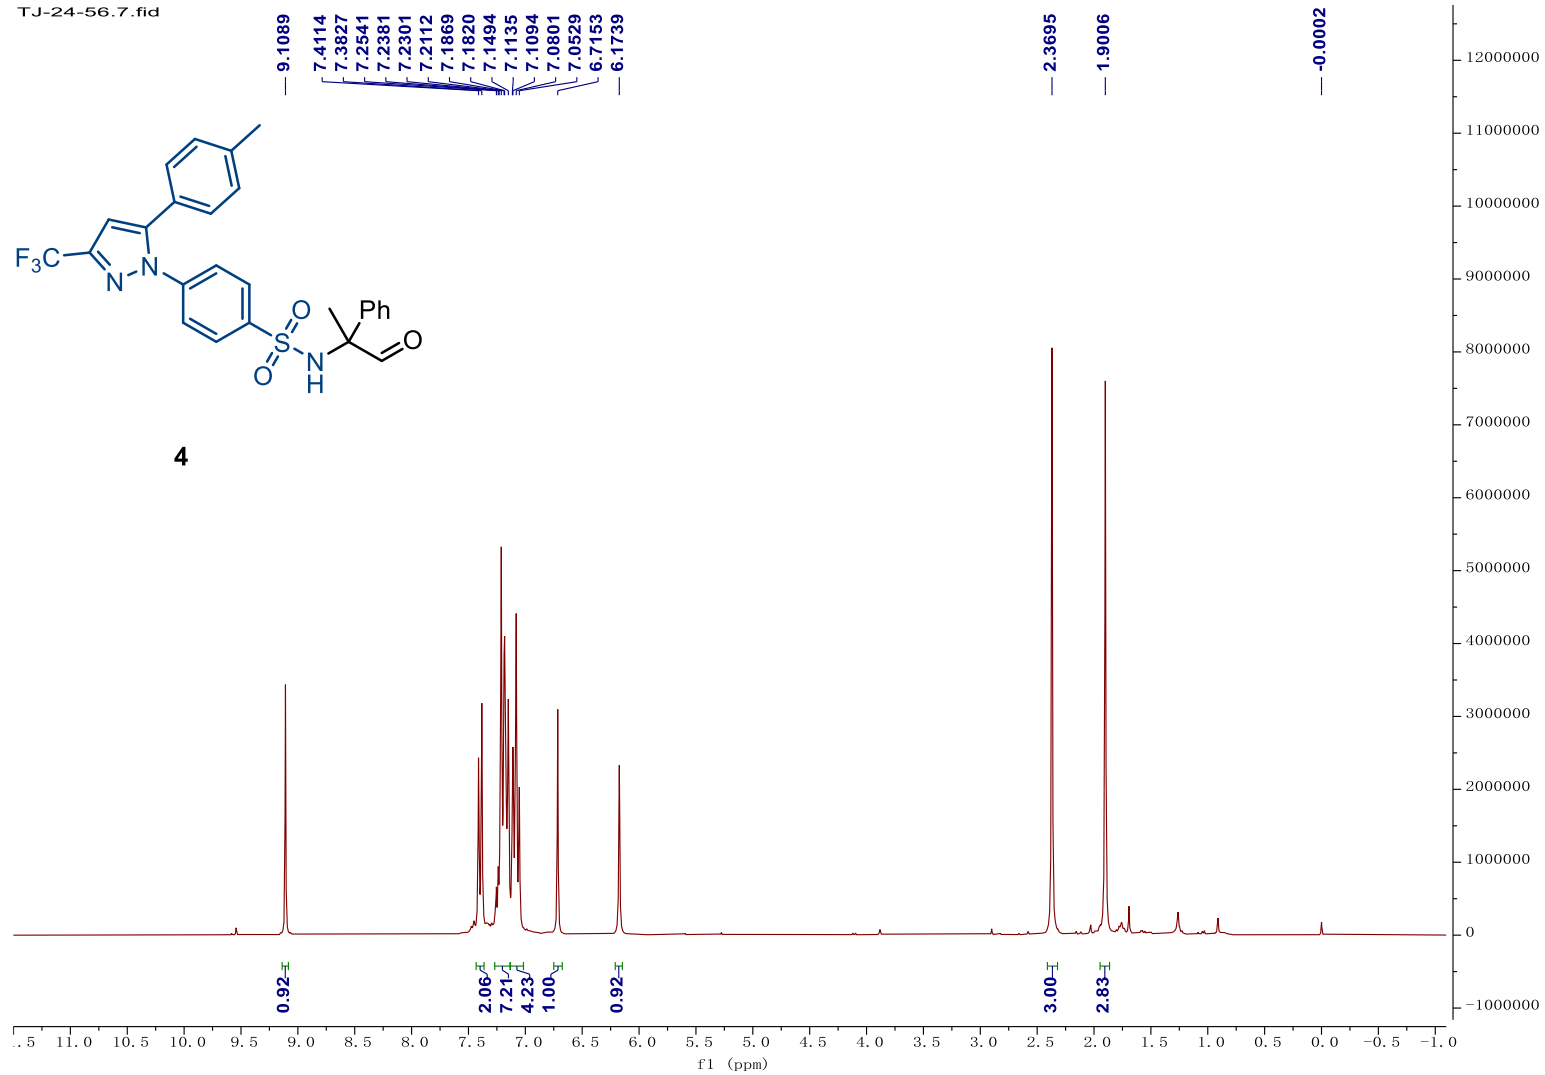

<sup>13</sup>C NMR spectrum of compound 4 (75 MHz, CDCl<sub>3</sub>)

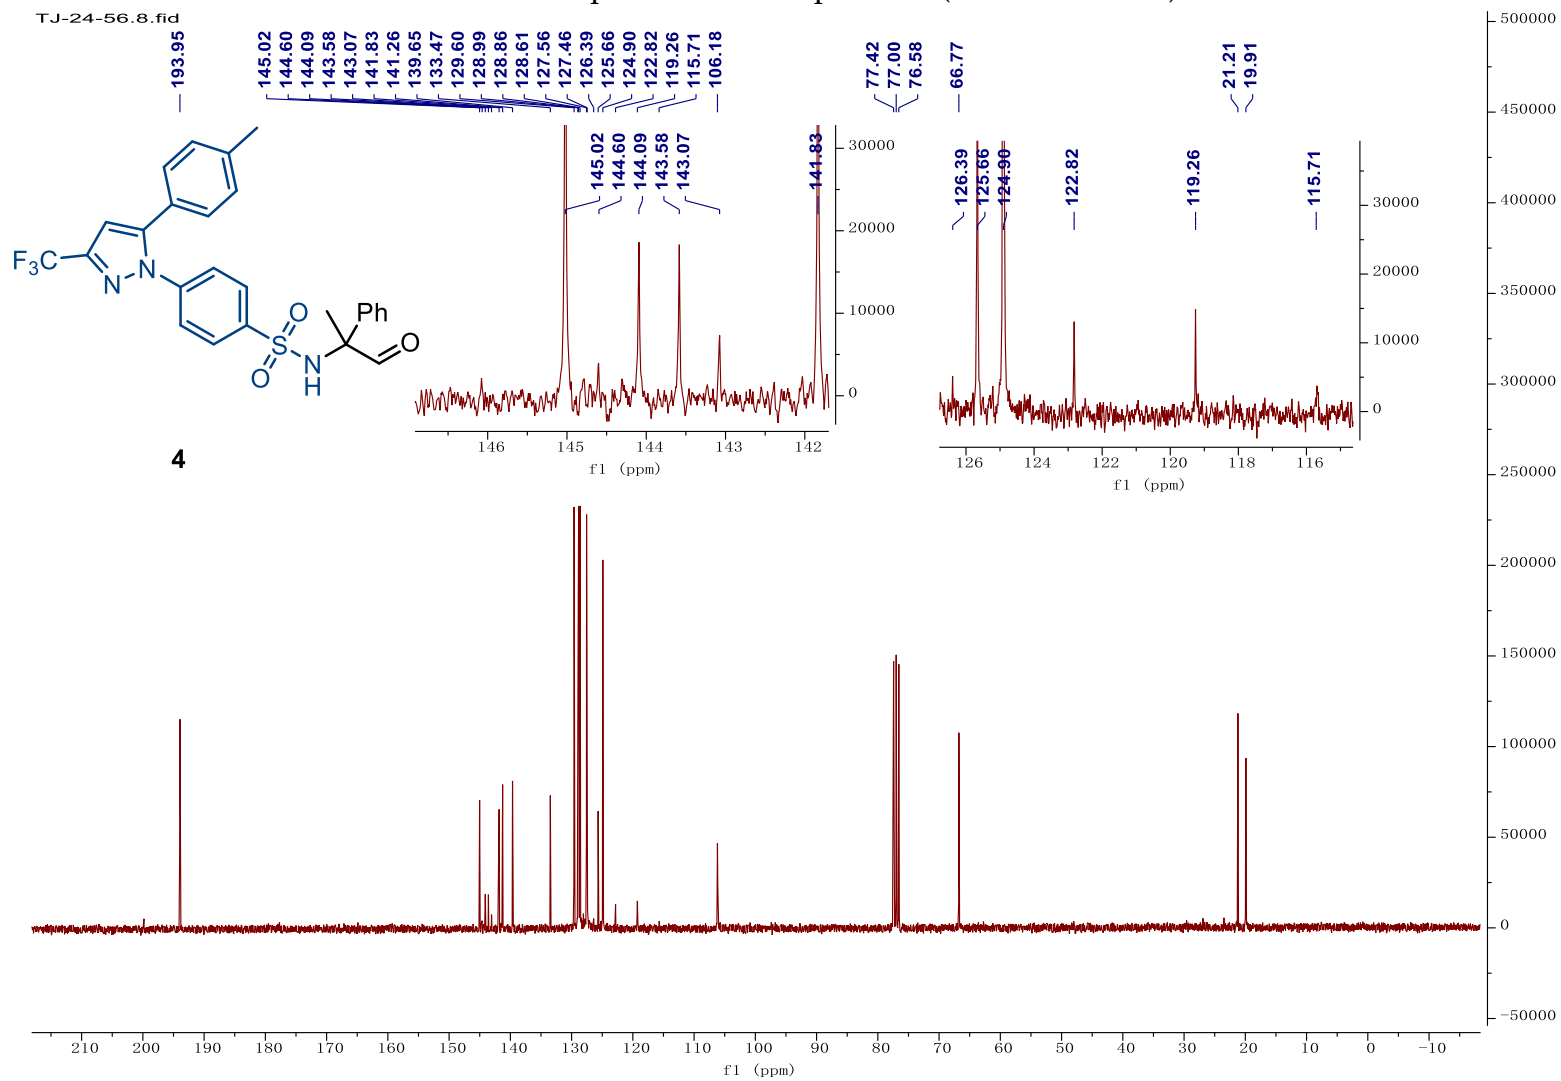

<sup>19</sup>F NMR spectrum of compound 4 (376 MHz, CDCl<sub>3</sub>)

y-28-56.1.fid  
F19CPD

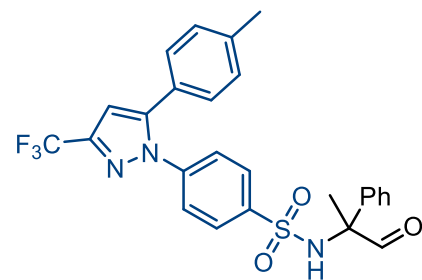

**4**

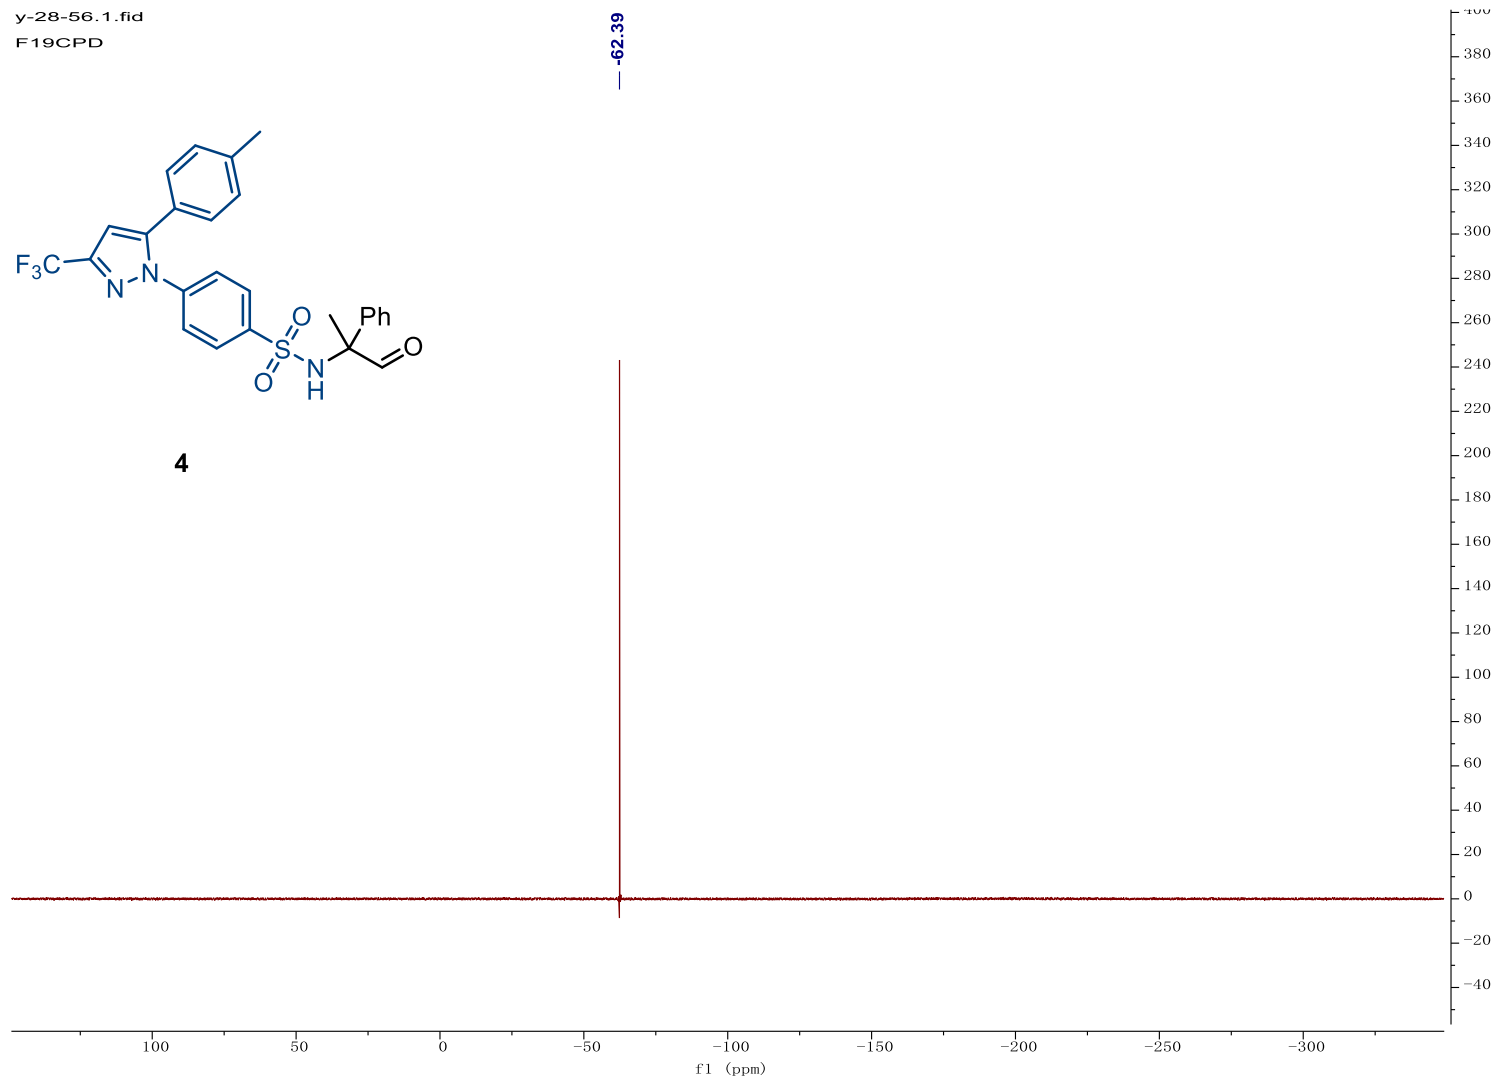

S59

<sup>1</sup>H NMR spectrum of compound 5 (300 MHz, CDCl<sub>3</sub>)

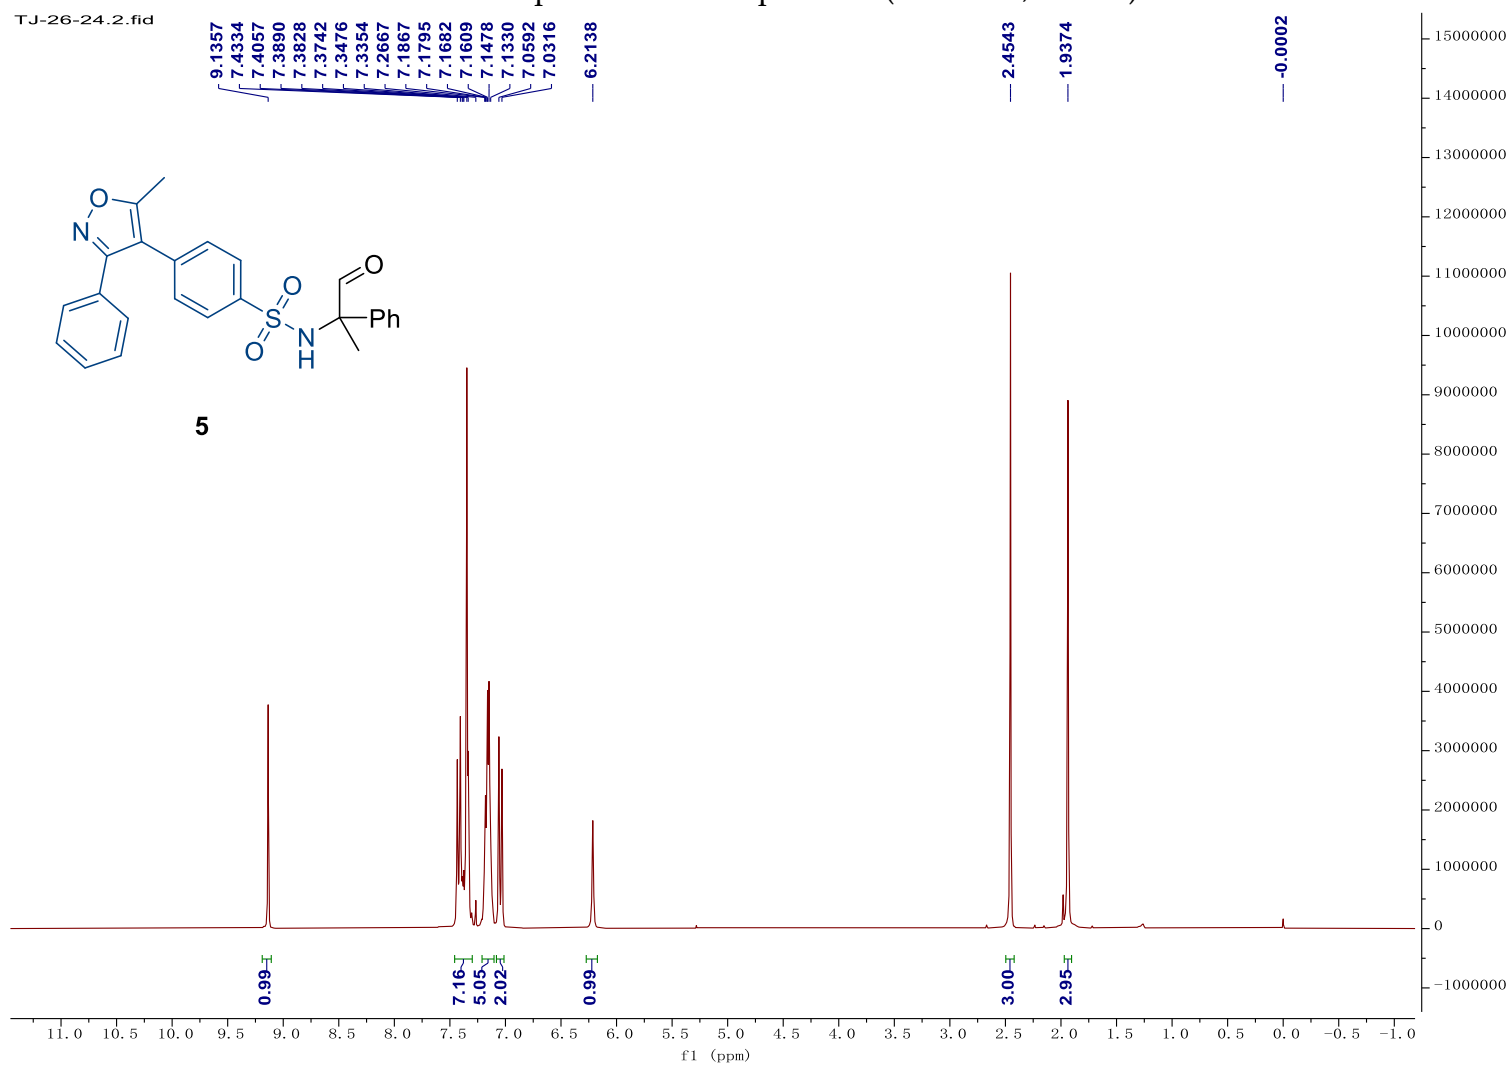

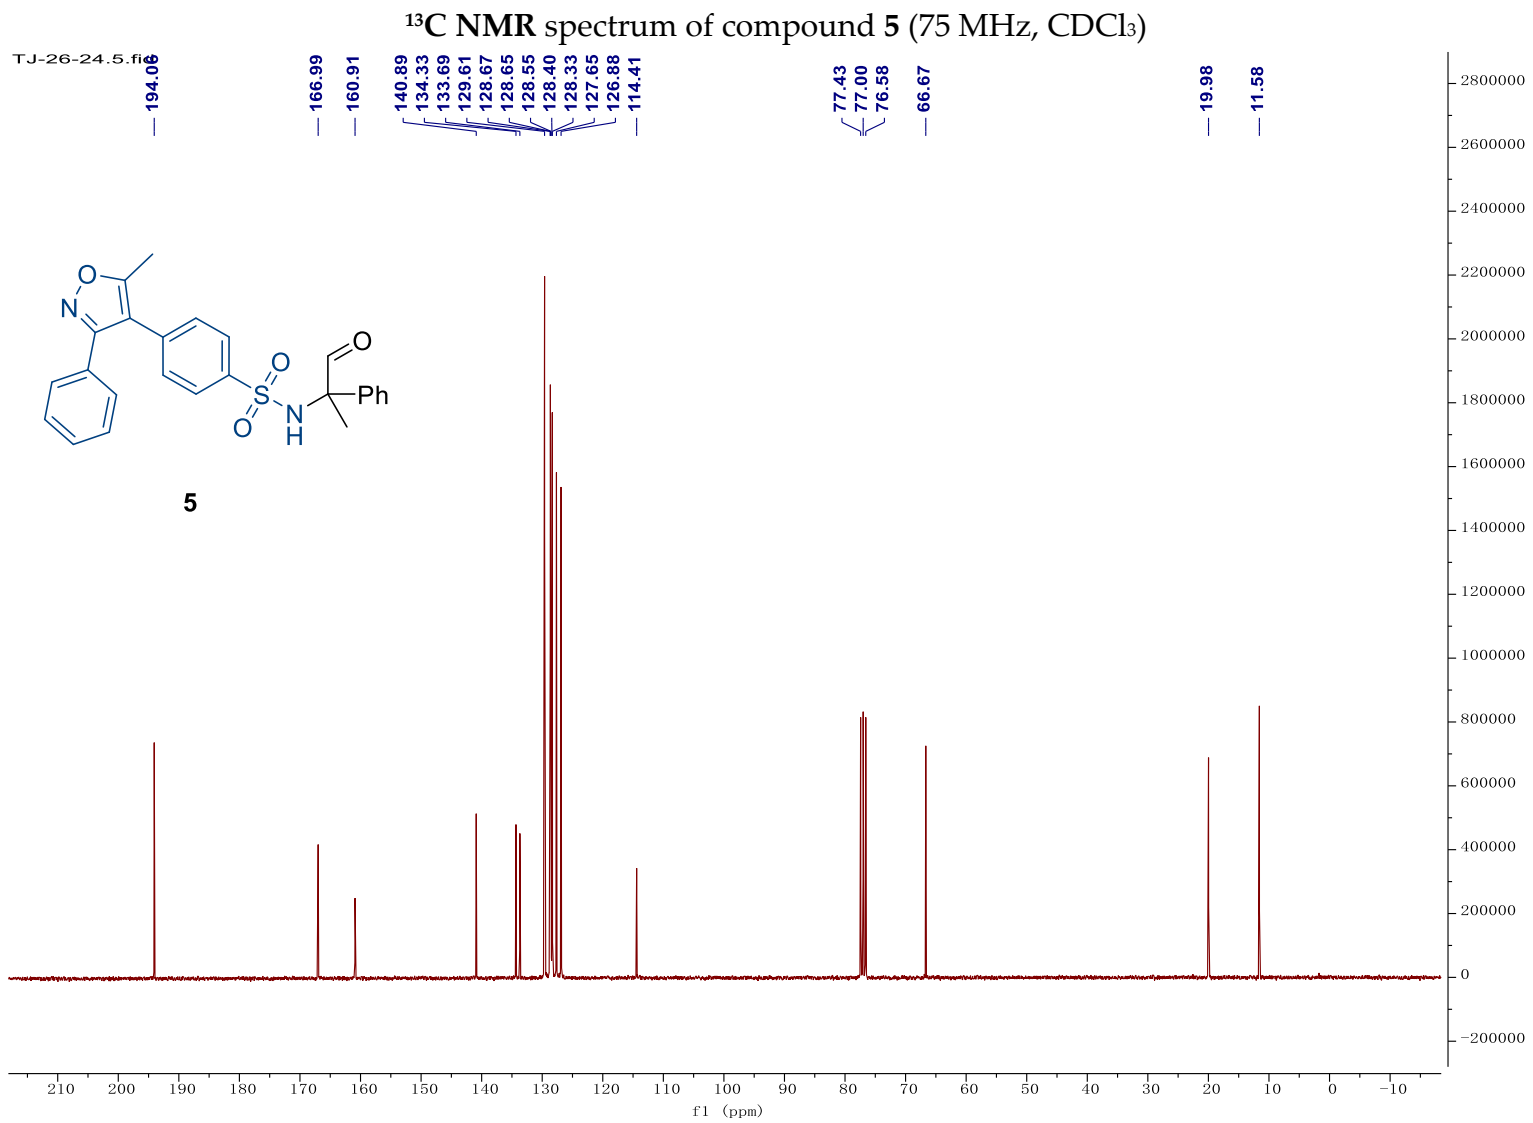

<sup>1</sup>H NMR spectrum of compound 6 (300 MHz, CDCl<sub>3</sub>)

TJ-26-34.1.fid

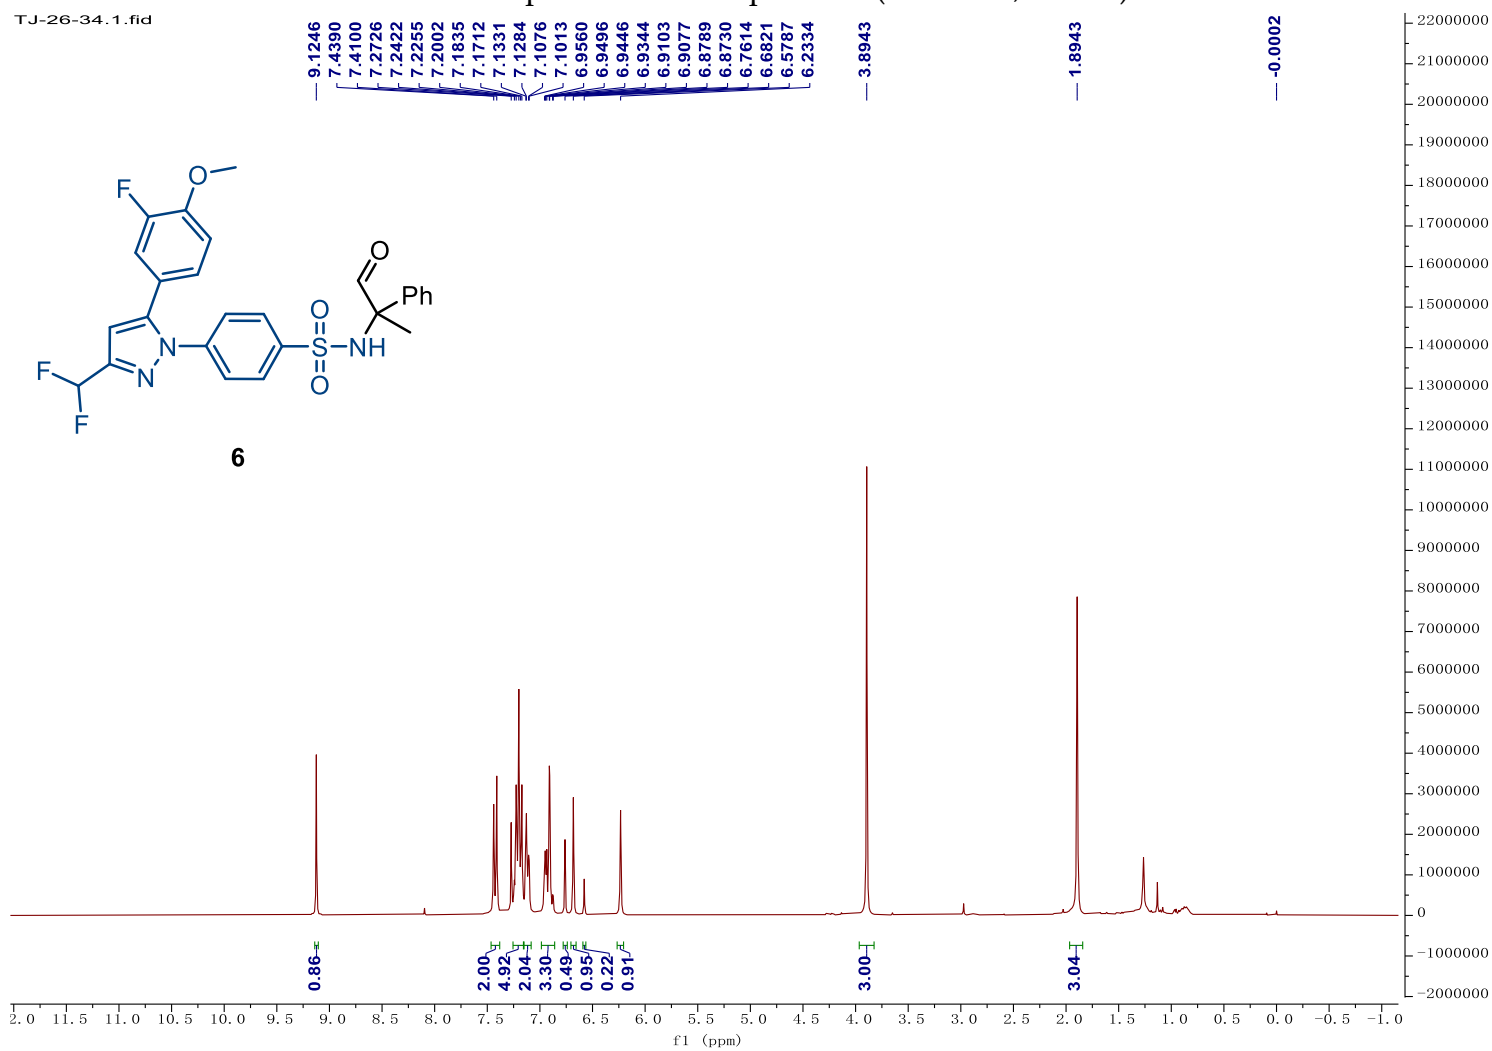

<sup>13</sup>C NMR spectrum of compound 6 (75 MHz, CDCl<sub>3</sub>)

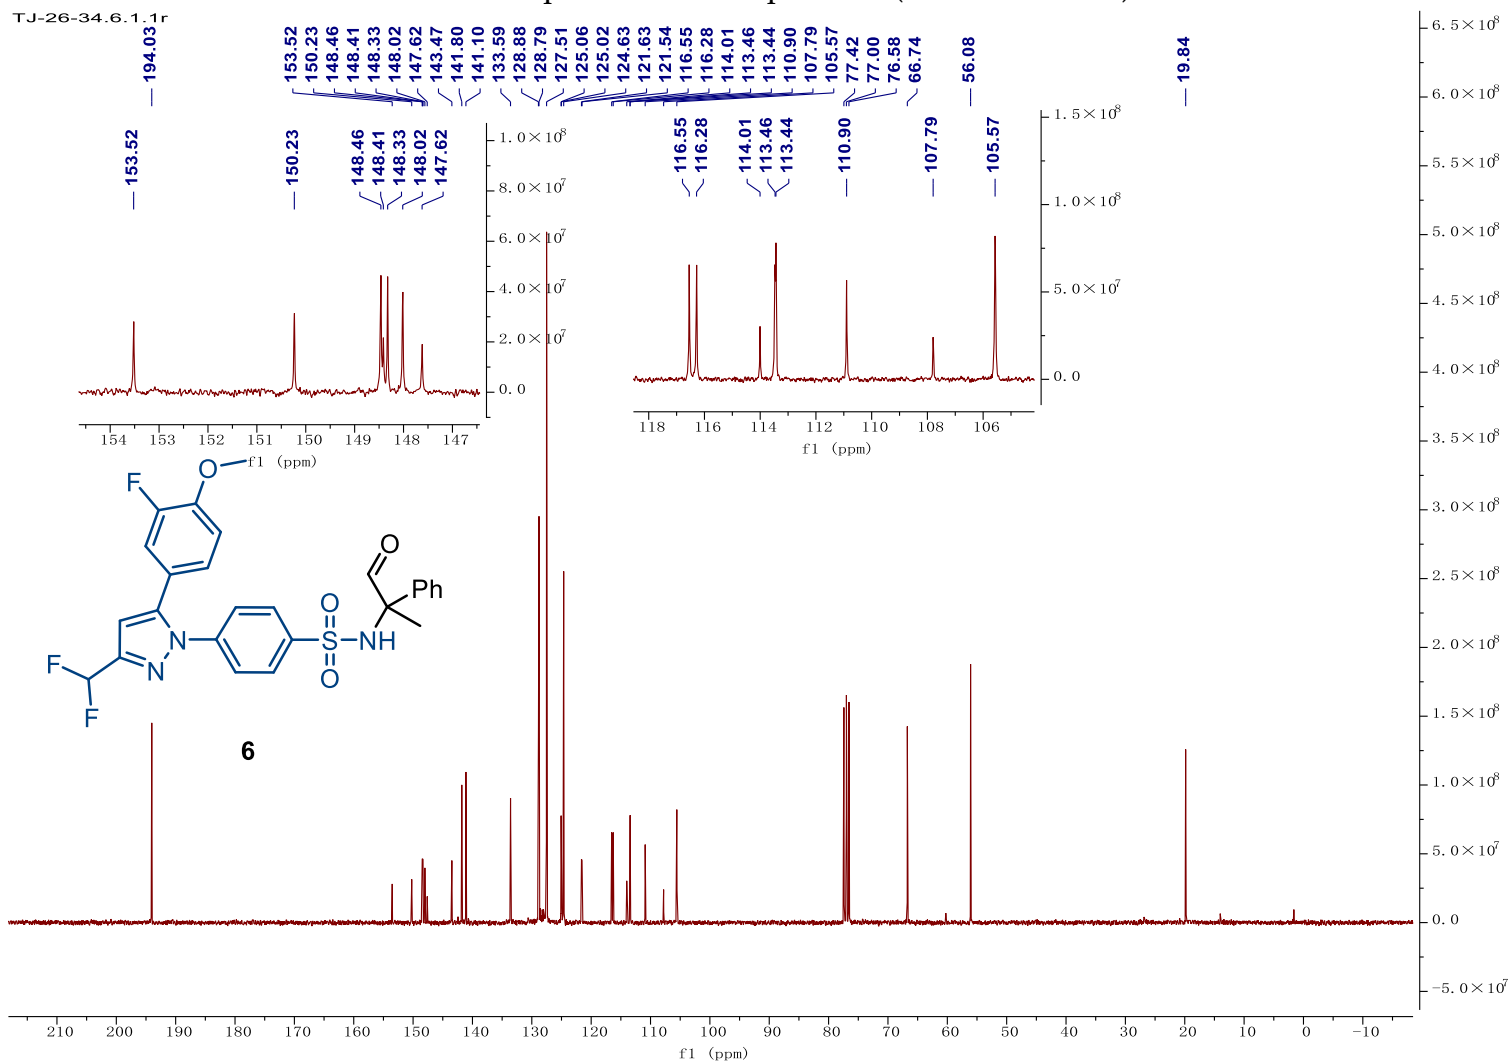

<sup>19</sup>F NMR spectrum of compound 6 (282 MHz, CDCl<sub>3</sub>)

TJ-26-34.4.fid

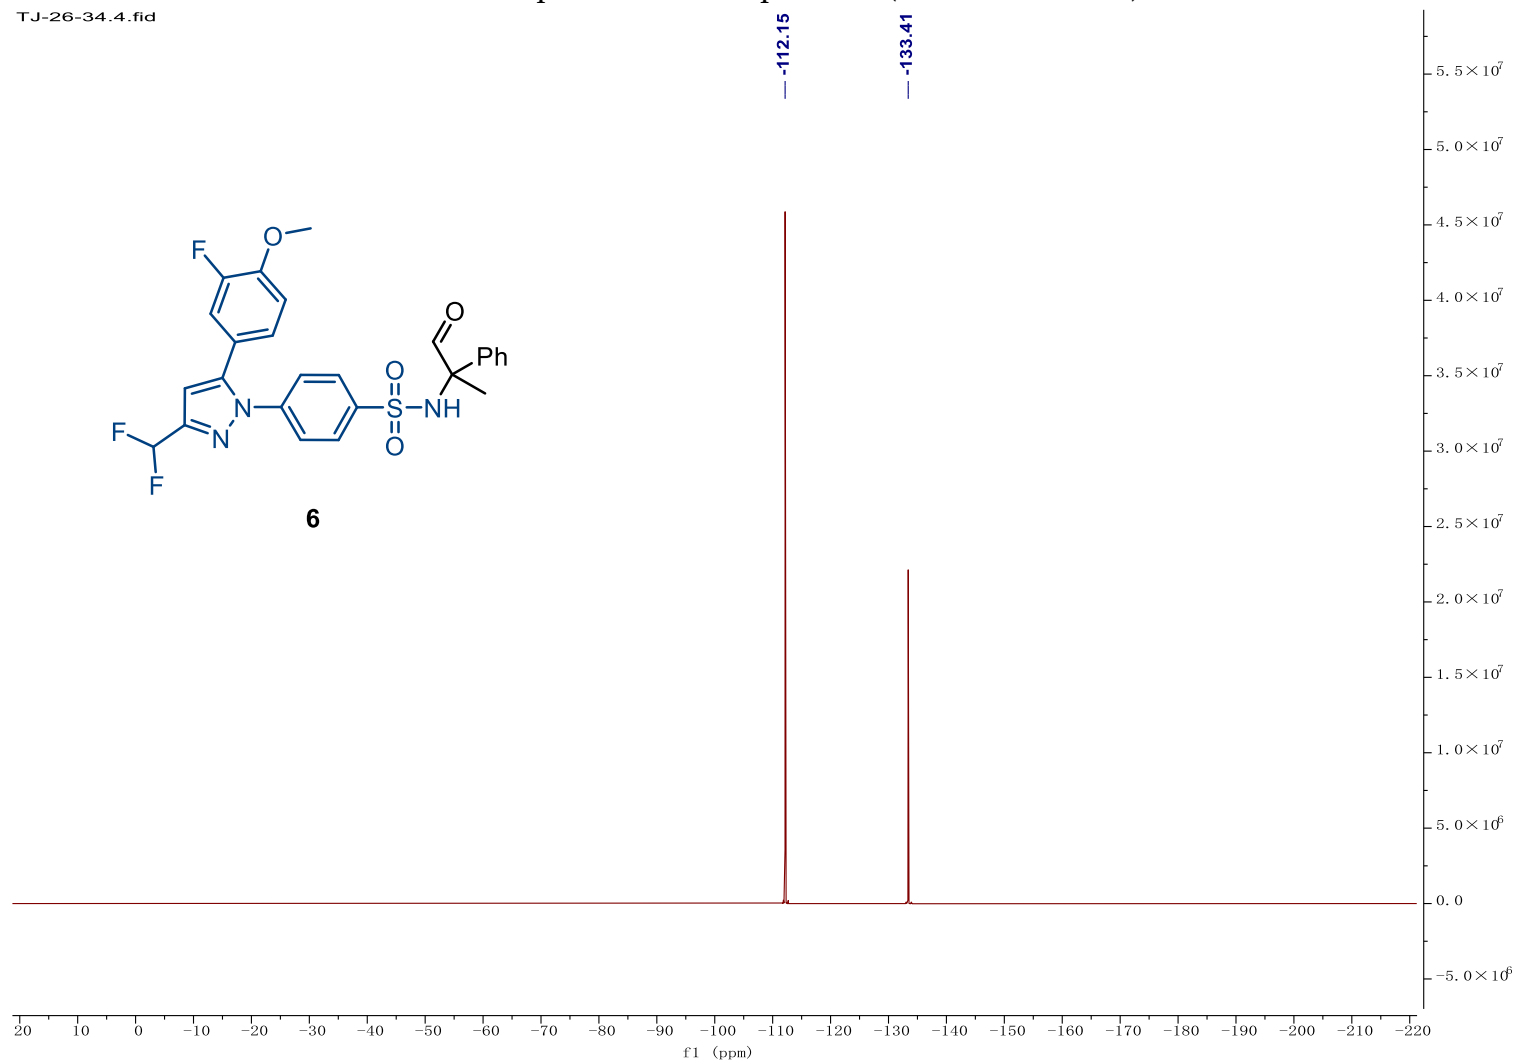

<sup>1</sup>H NMR spectrum of compound 7 (300 MHz, Acetone-d<sub>6</sub>)

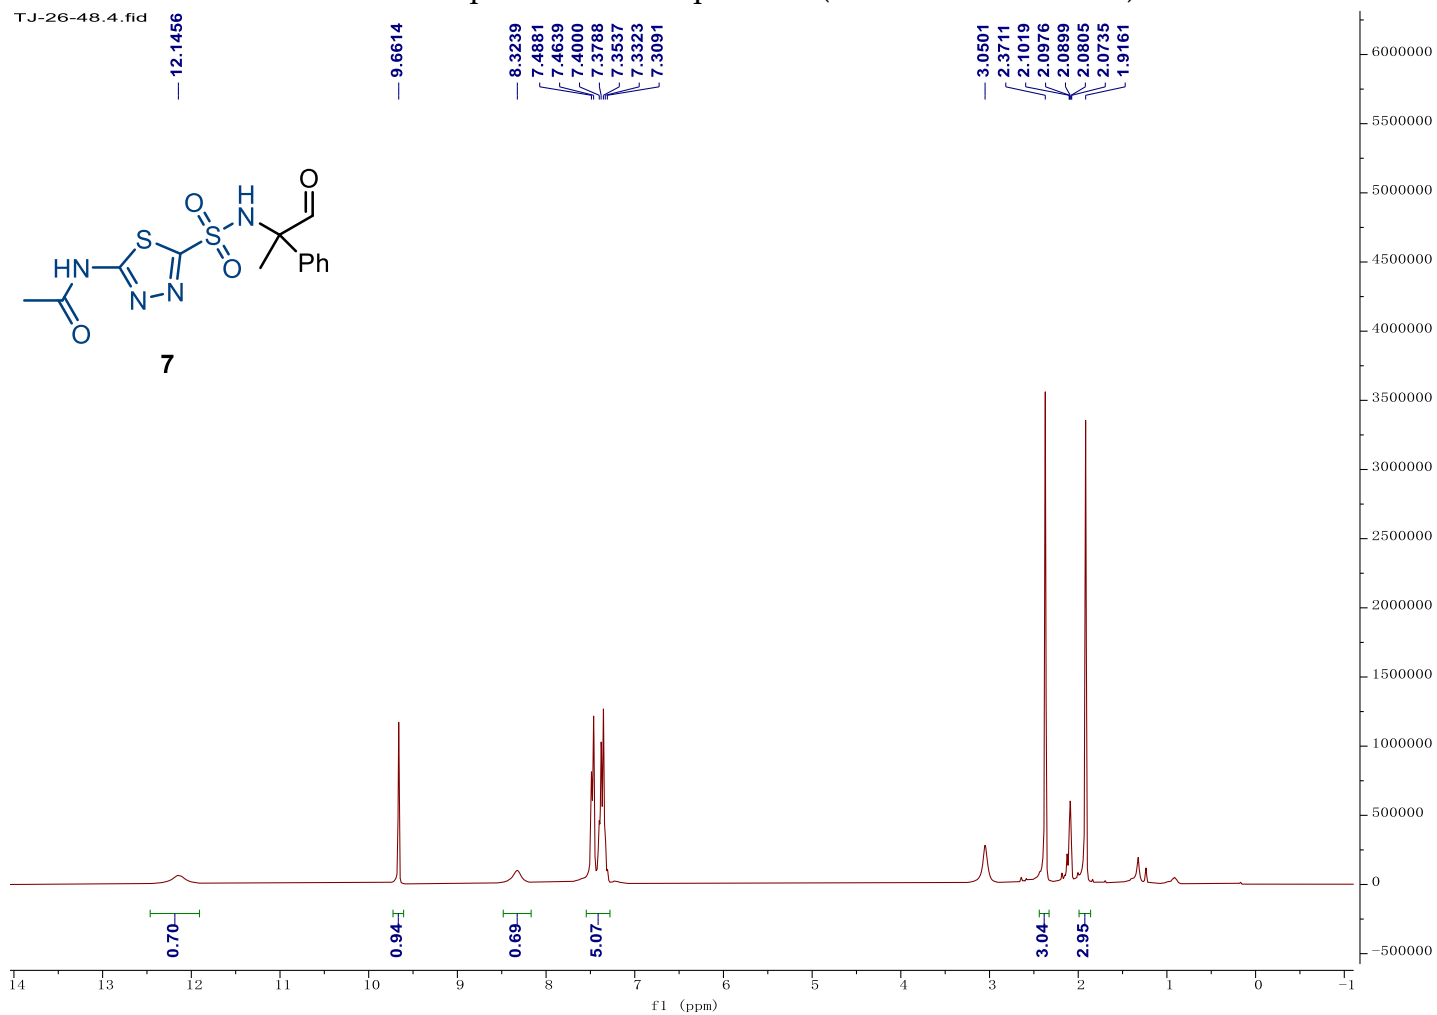

<sup>13</sup>C NMR spectrum of compound 7 (75 MHz, Acetone-*d*<sub>6</sub>)

TJ-26-48.5.fid

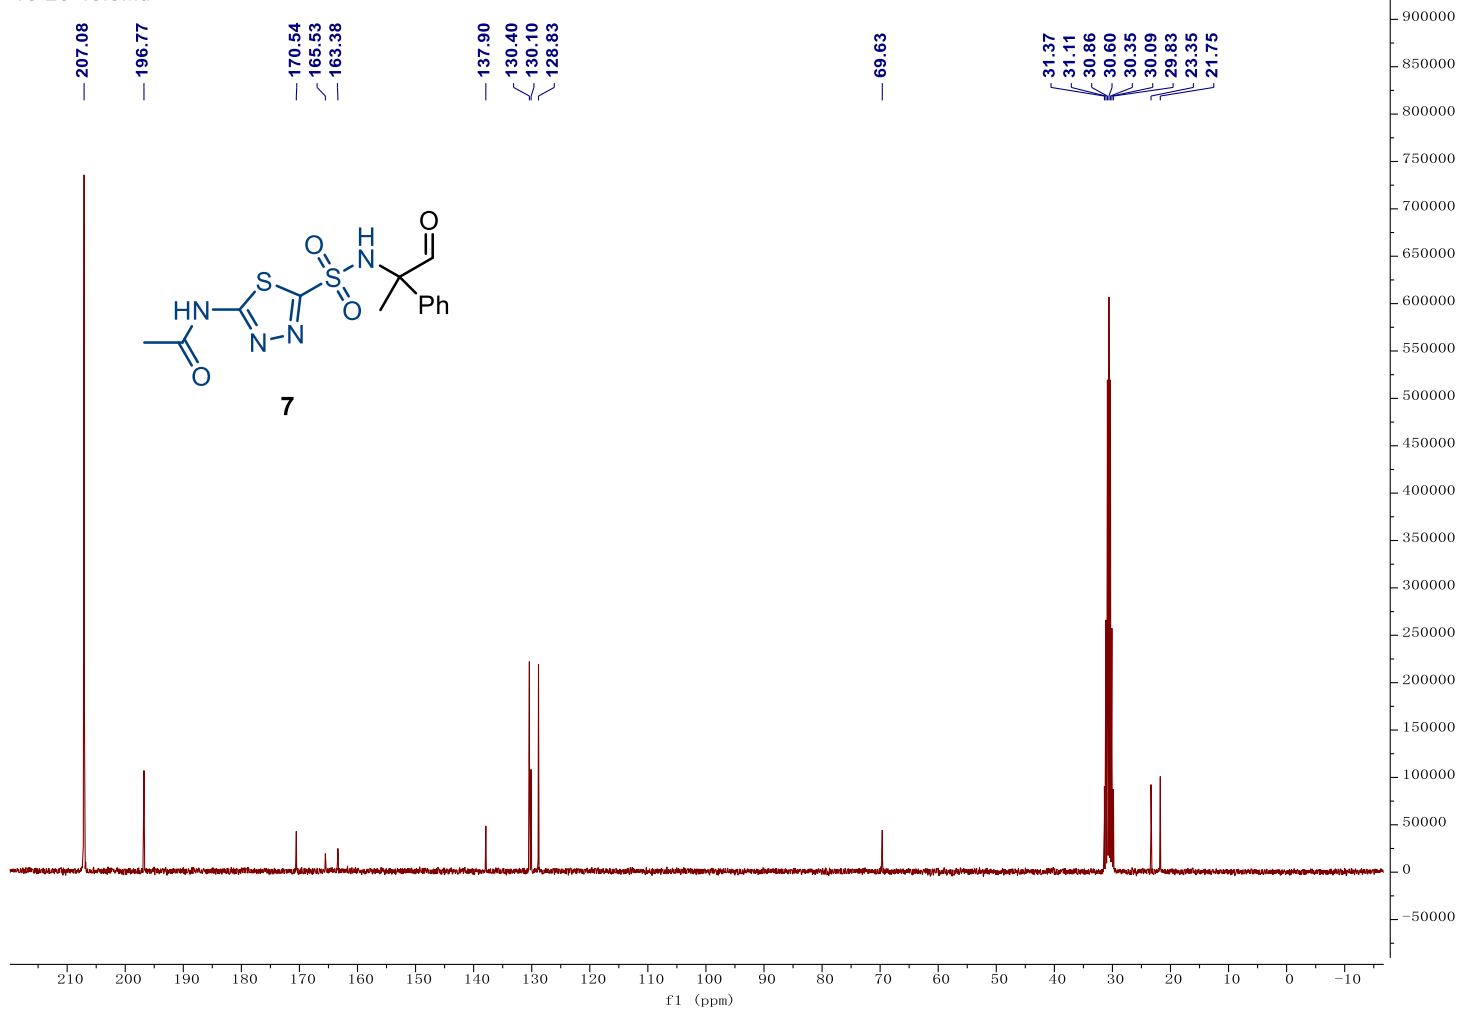

<sup>1</sup>H NMR spectrum of compound 8 (300 MHz, DMSO-d<sub>6</sub>)

TJ-26-21.32.fid

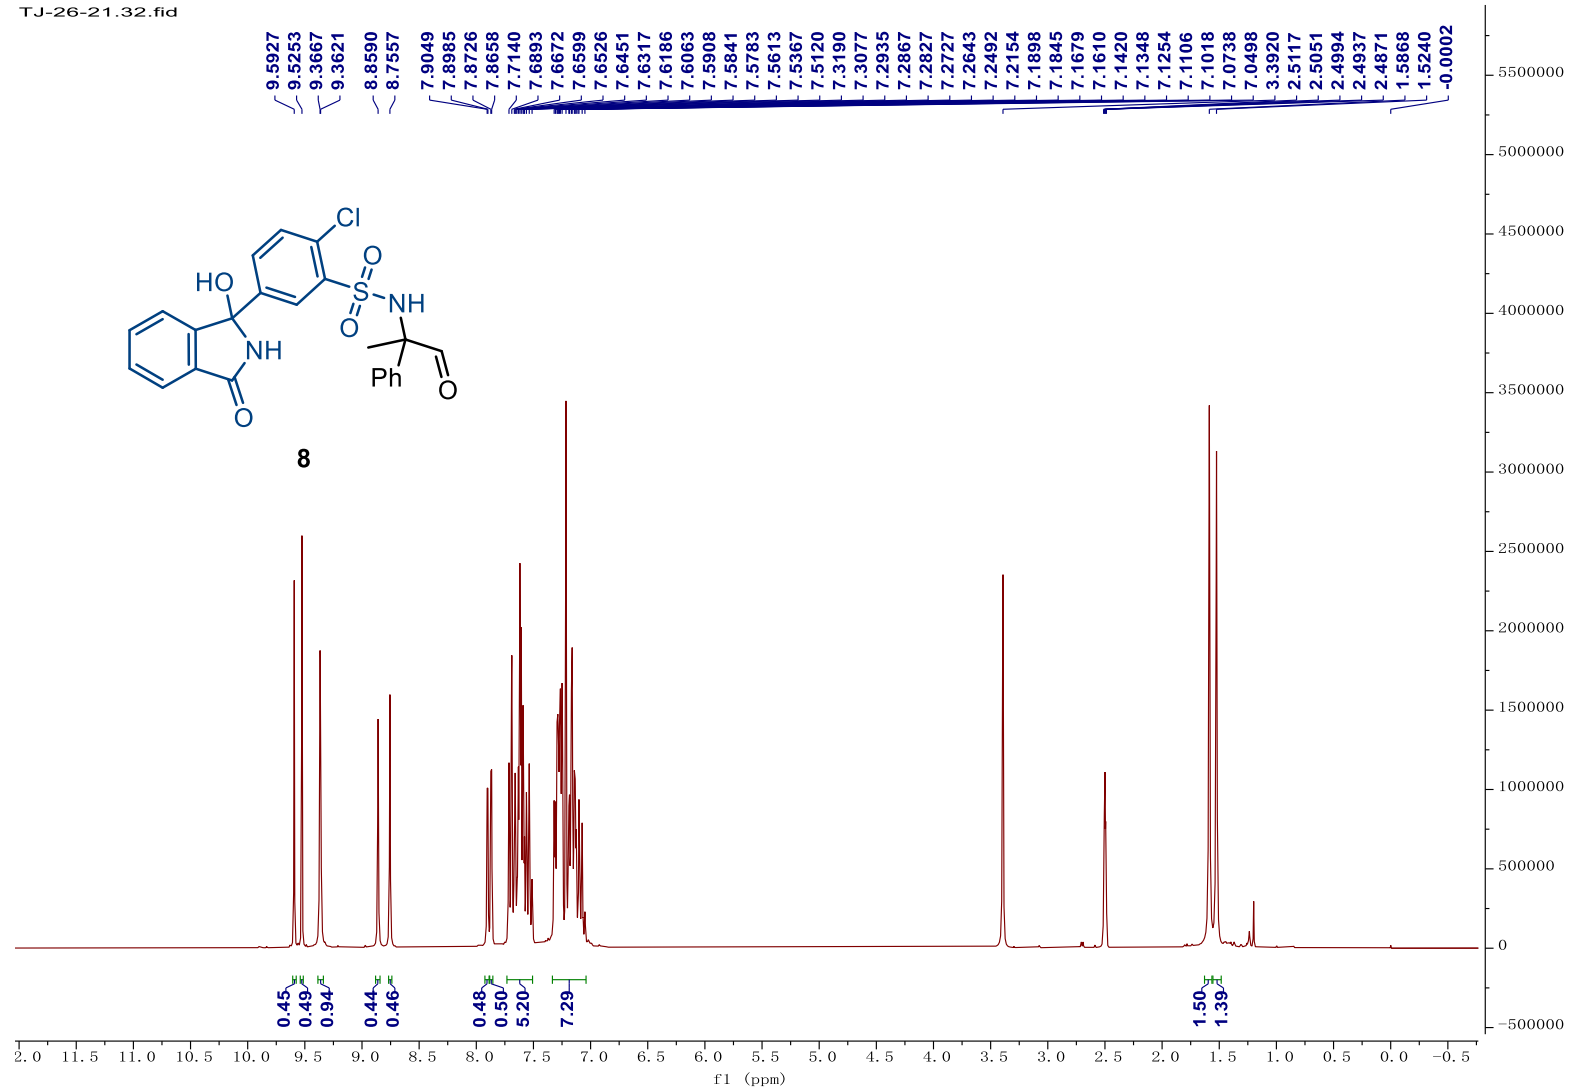

<sup>13</sup>C NMR spectrum of compound 8 (75 MHz, DMSO-d<sub>6</sub>)

TJ-26-21.33.fid

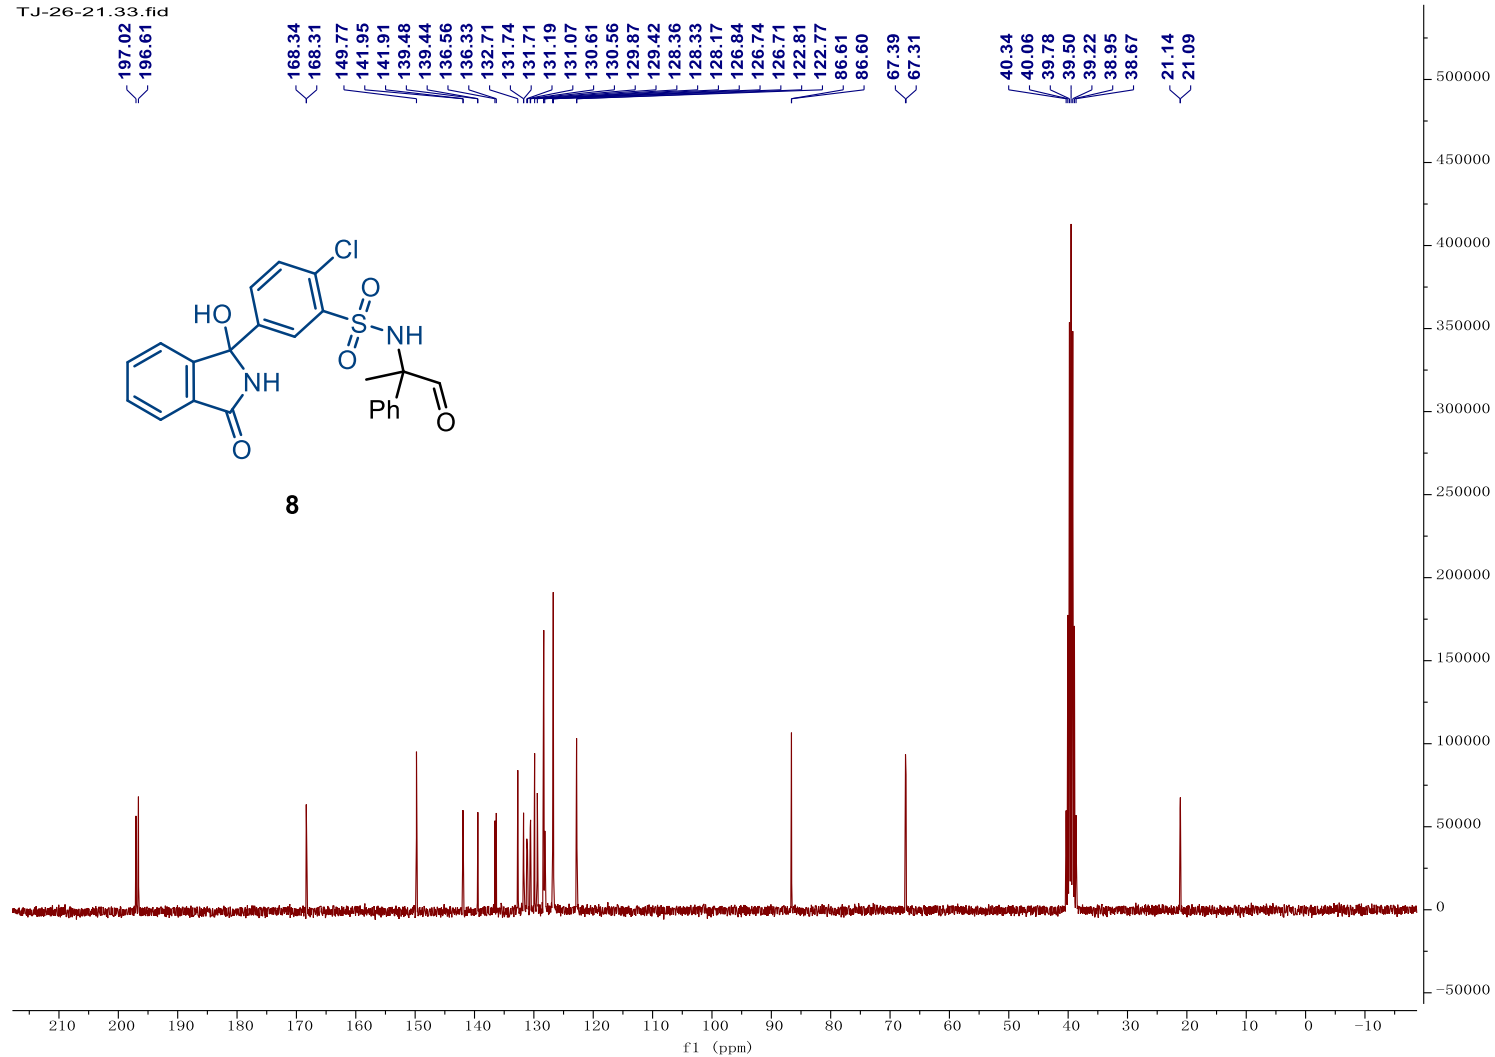

<sup>1</sup>H NMR spectrum of compound 9 (300 MHz, CDCl<sub>3</sub>)

TJ-26-29.10.fid

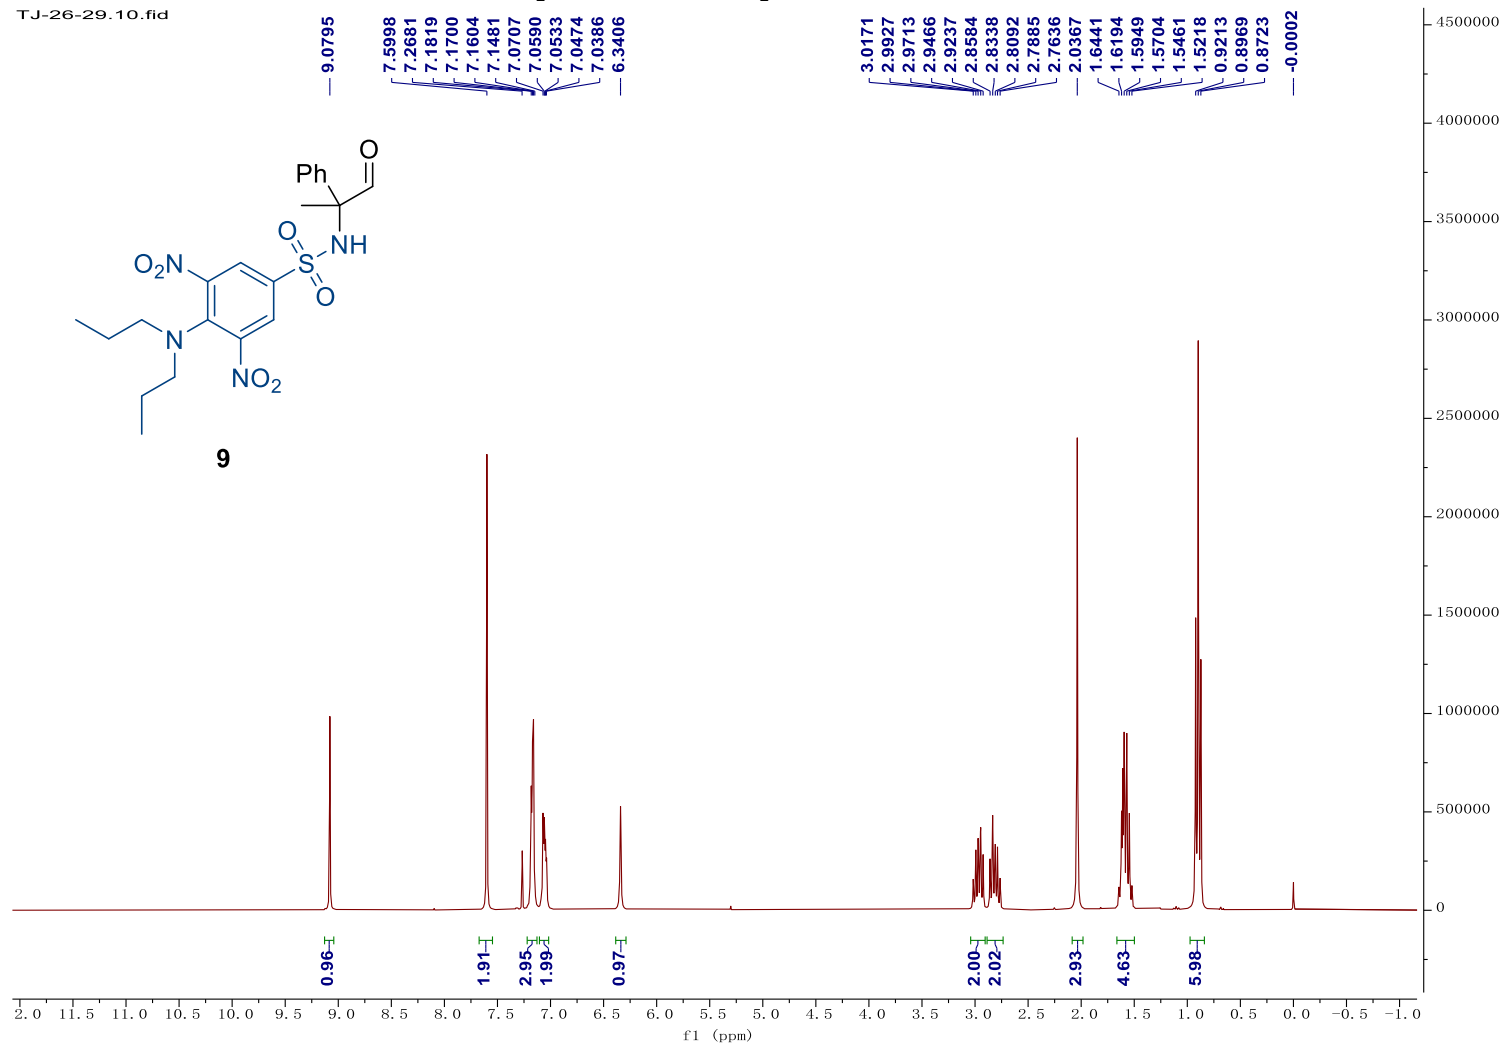

<sup>13</sup>C NMR spectrum of compound 9 (75 MHz, CDCl<sub>3</sub>)

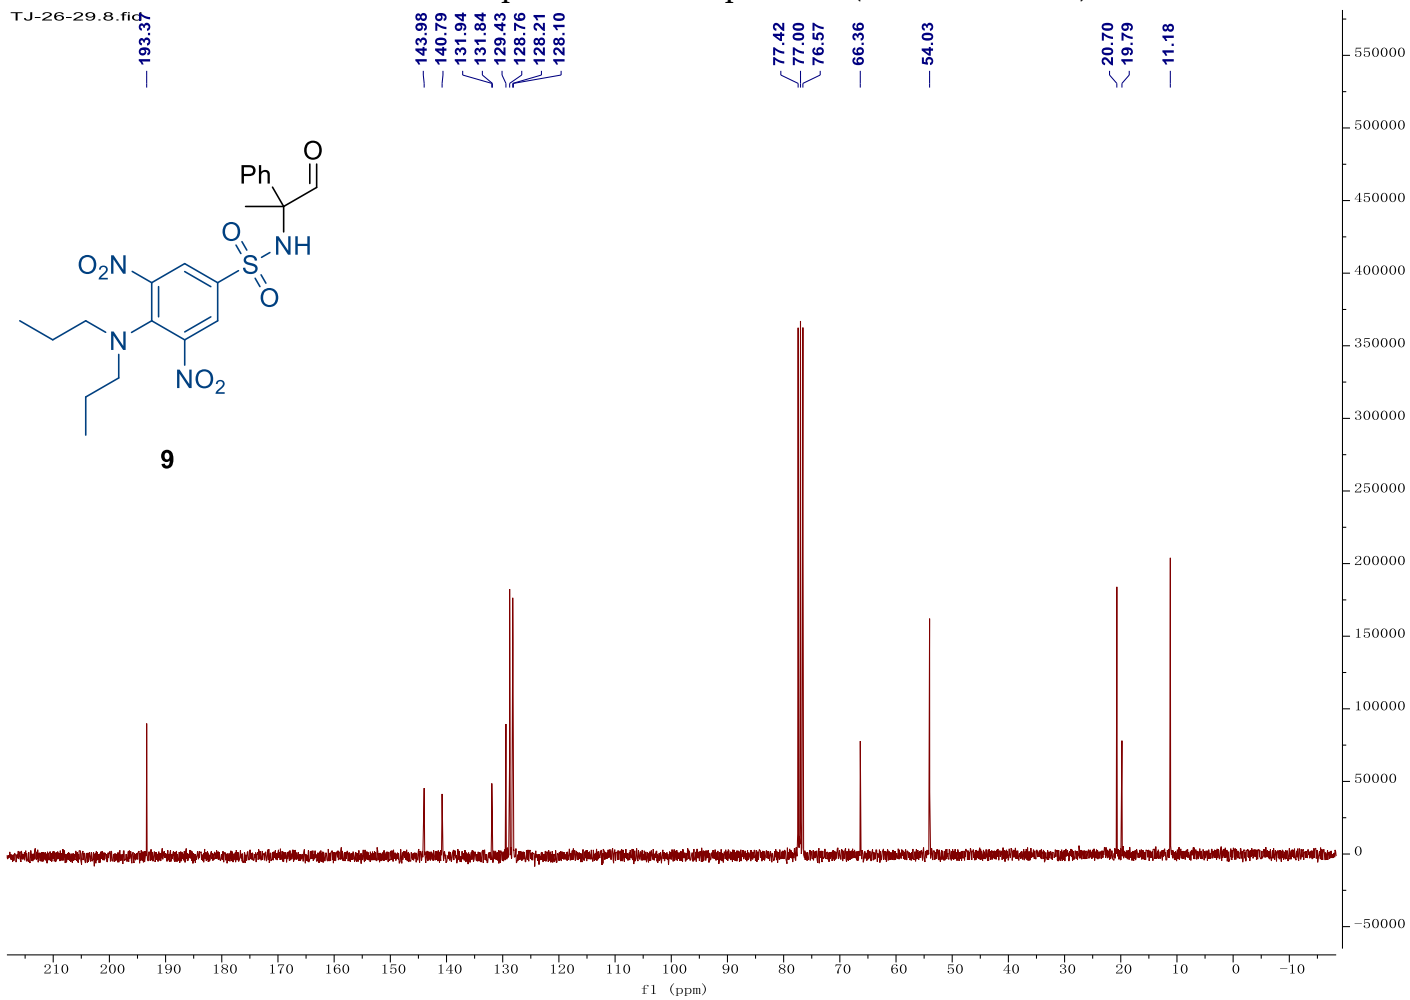

<sup>1</sup>H NMR spectrum of compound **10** (300 MHz, CDCl<sub>3</sub>)

TJ-27-9.1.fid

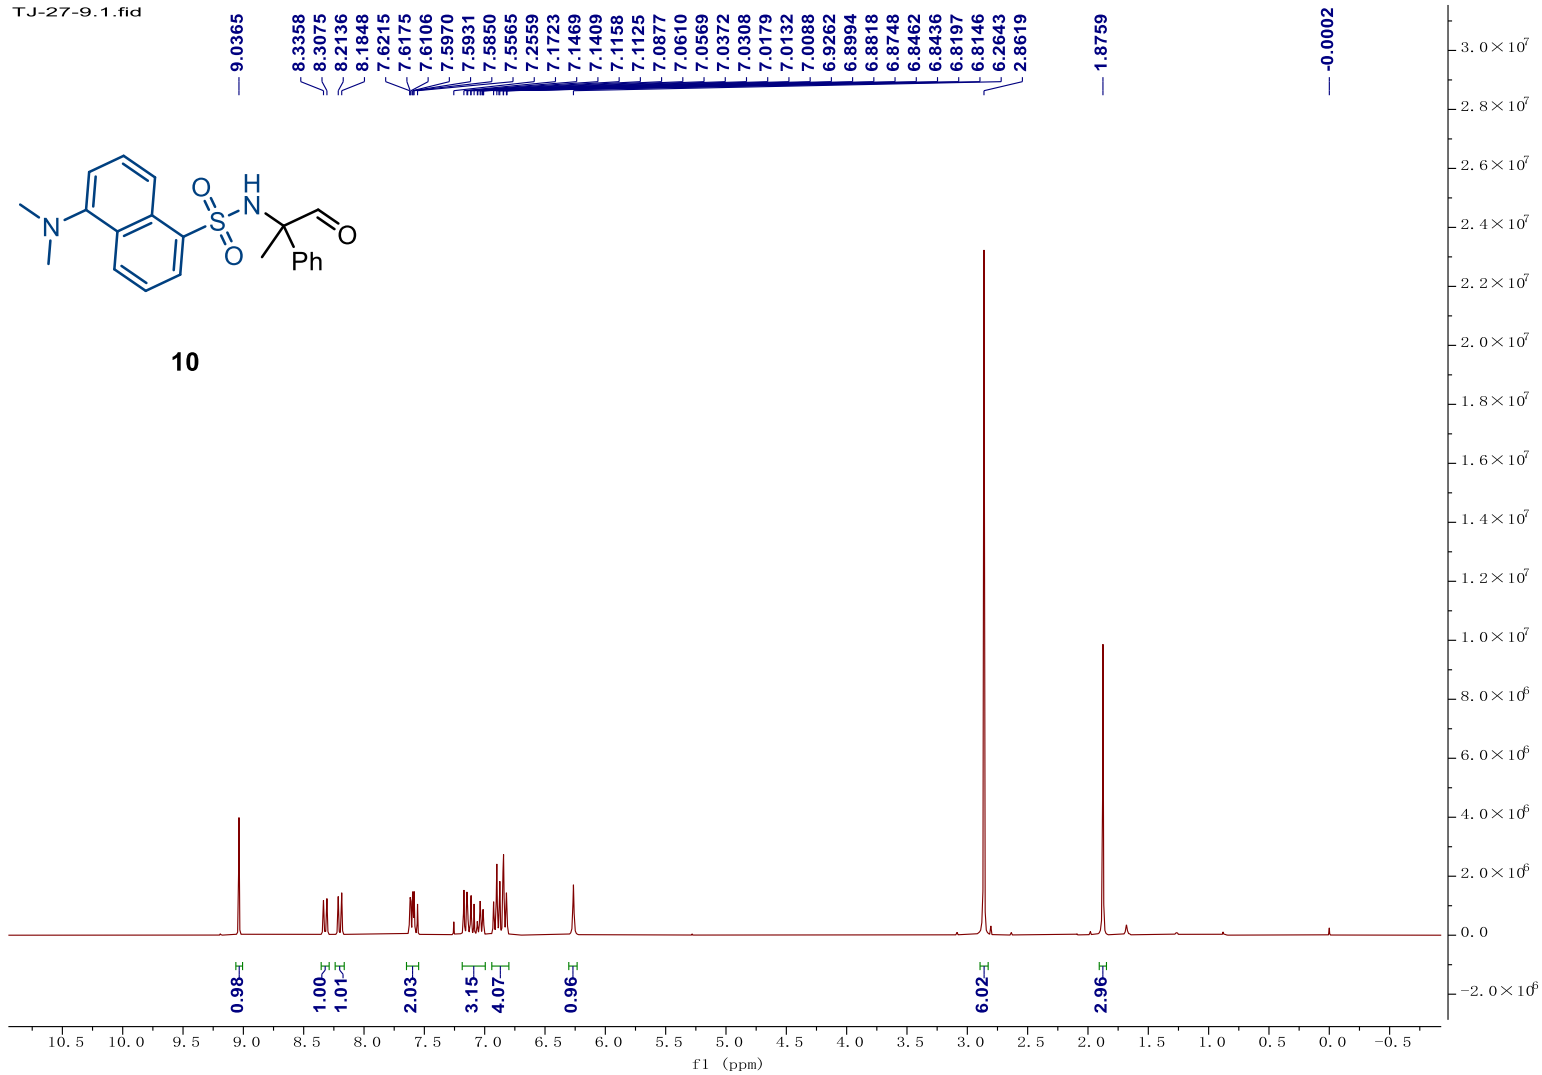

<sup>13</sup>C NMR spectrum of compound 10 (75 MHz, CDCl<sub>3</sub>)

TJ-27-9.2.fid

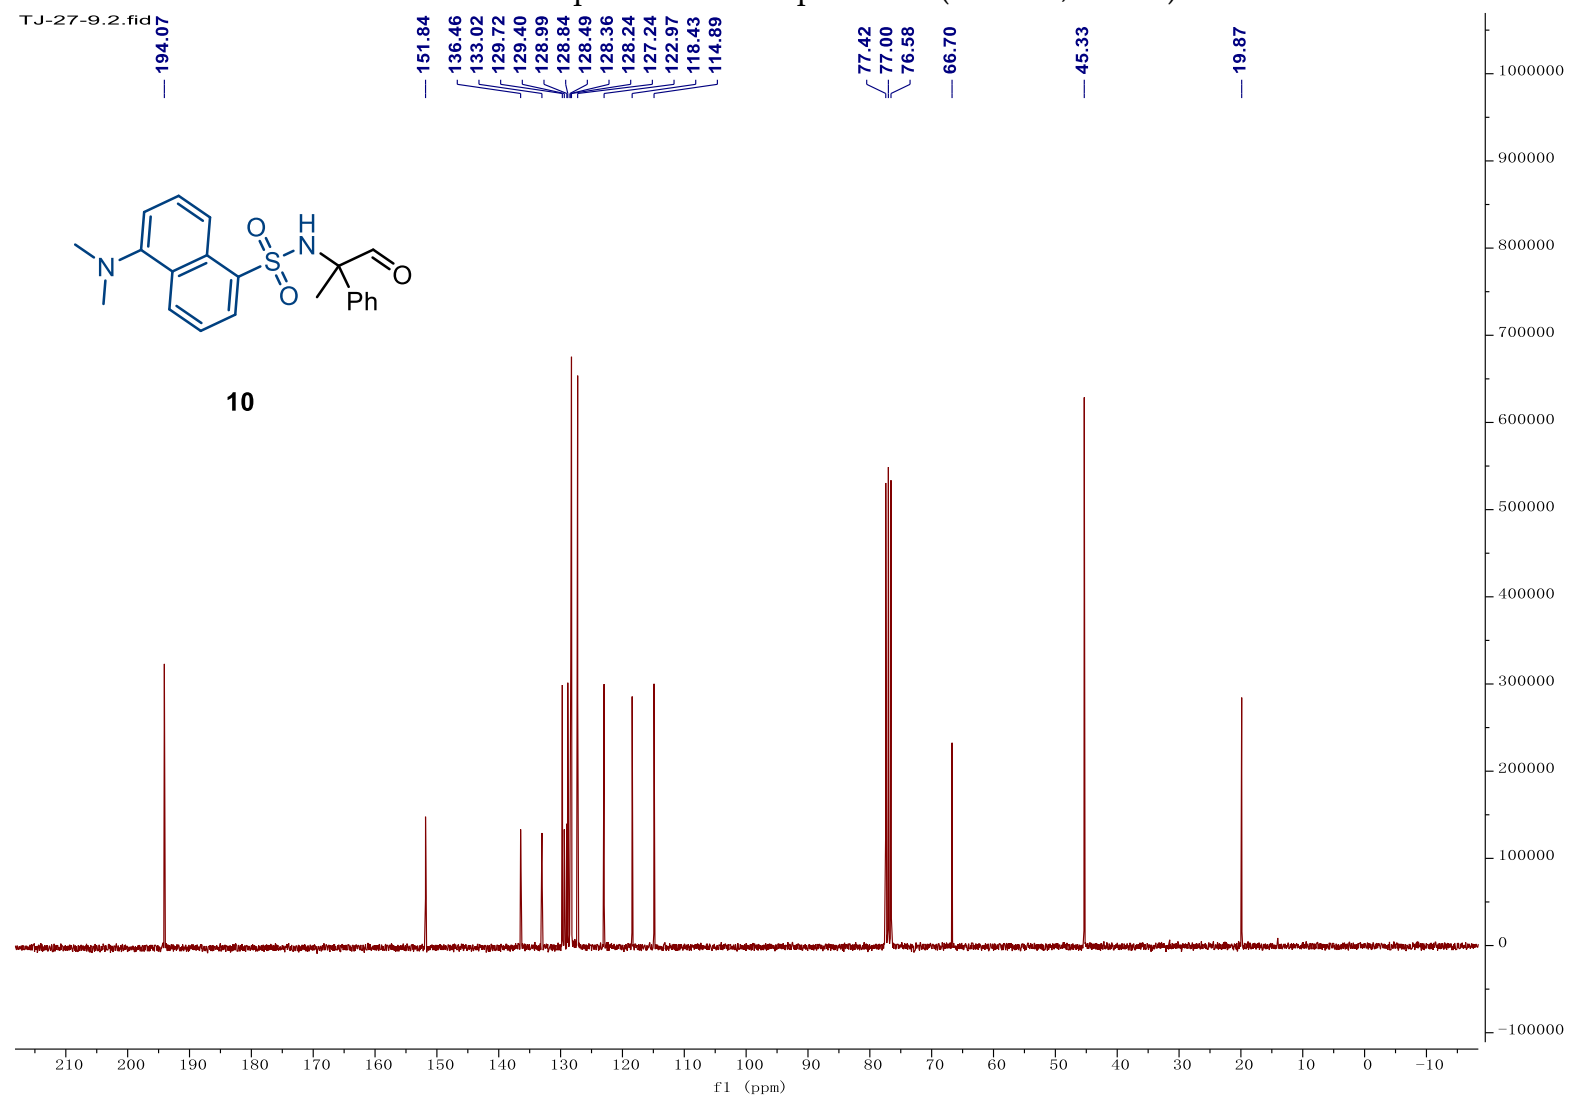

<sup>1</sup>H NMR spectrum of compound **11** (300 MHz, Acetone-d<sub>6</sub>)

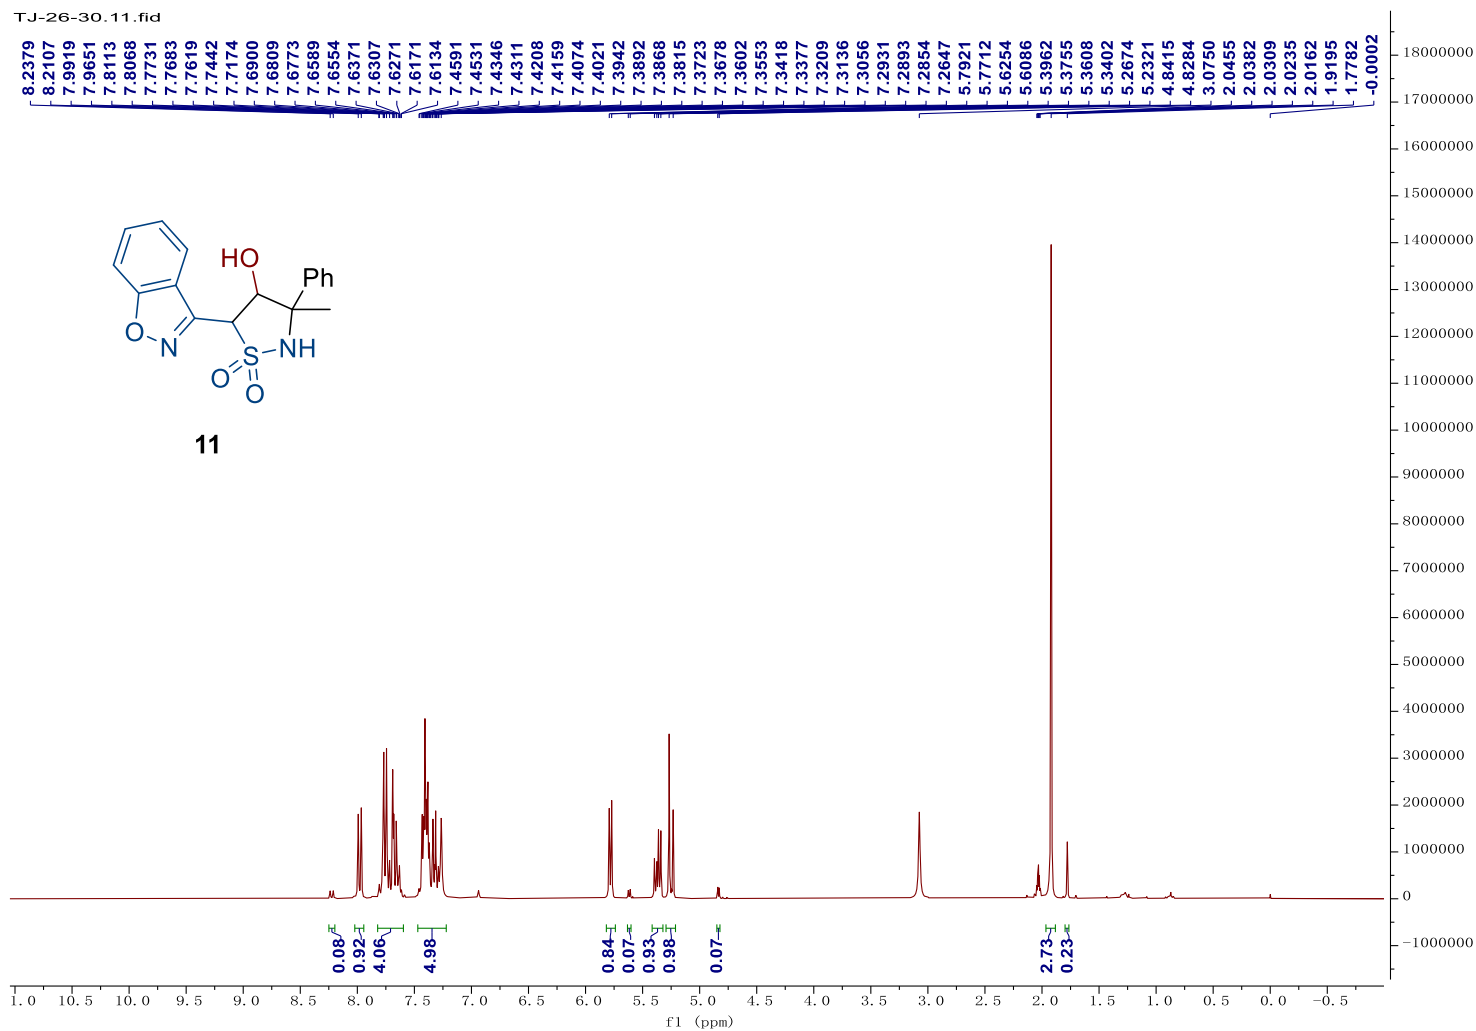

<sup>13</sup>C NMR spectrum of compound **11** (75 MHz, Acetone-*d*<sub>6</sub>)

TJ-26-30.12.fid

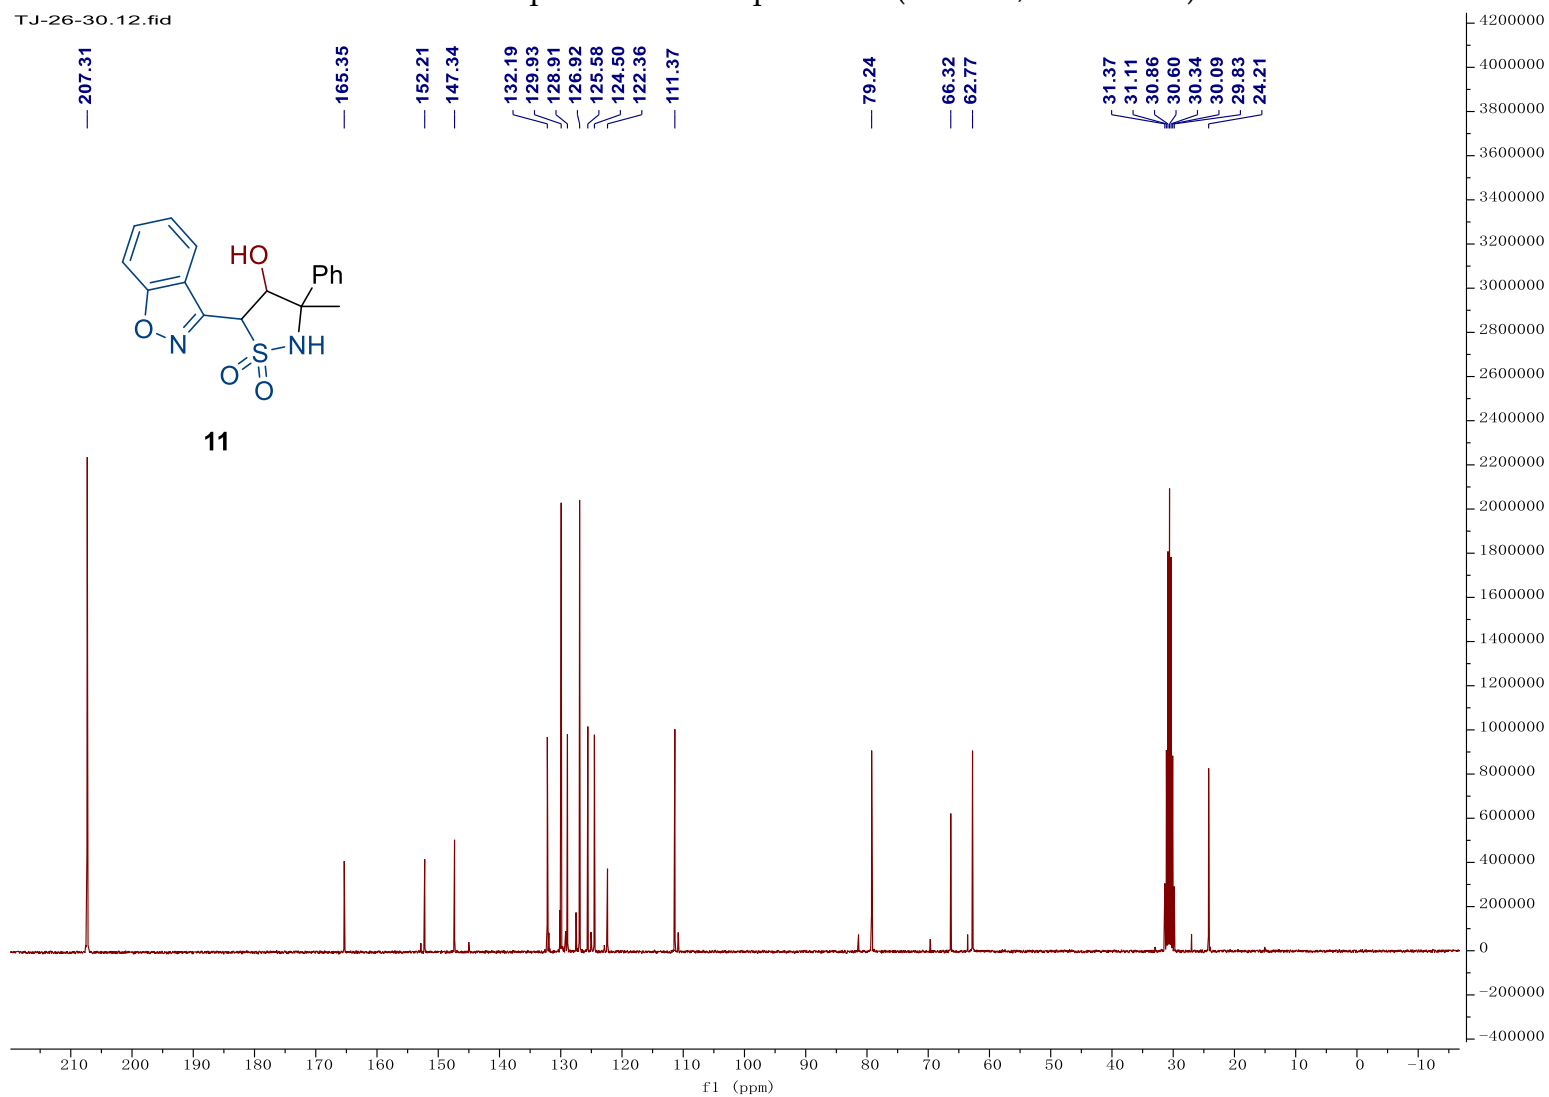



<sup>13</sup>C NMR spectrum of compound 12 (75 MHz, CDCl<sub>3</sub>)

TJ-27-28.26.fid

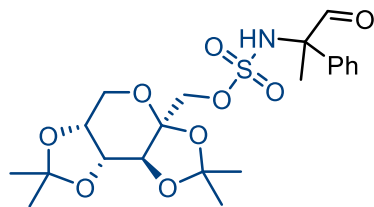

12

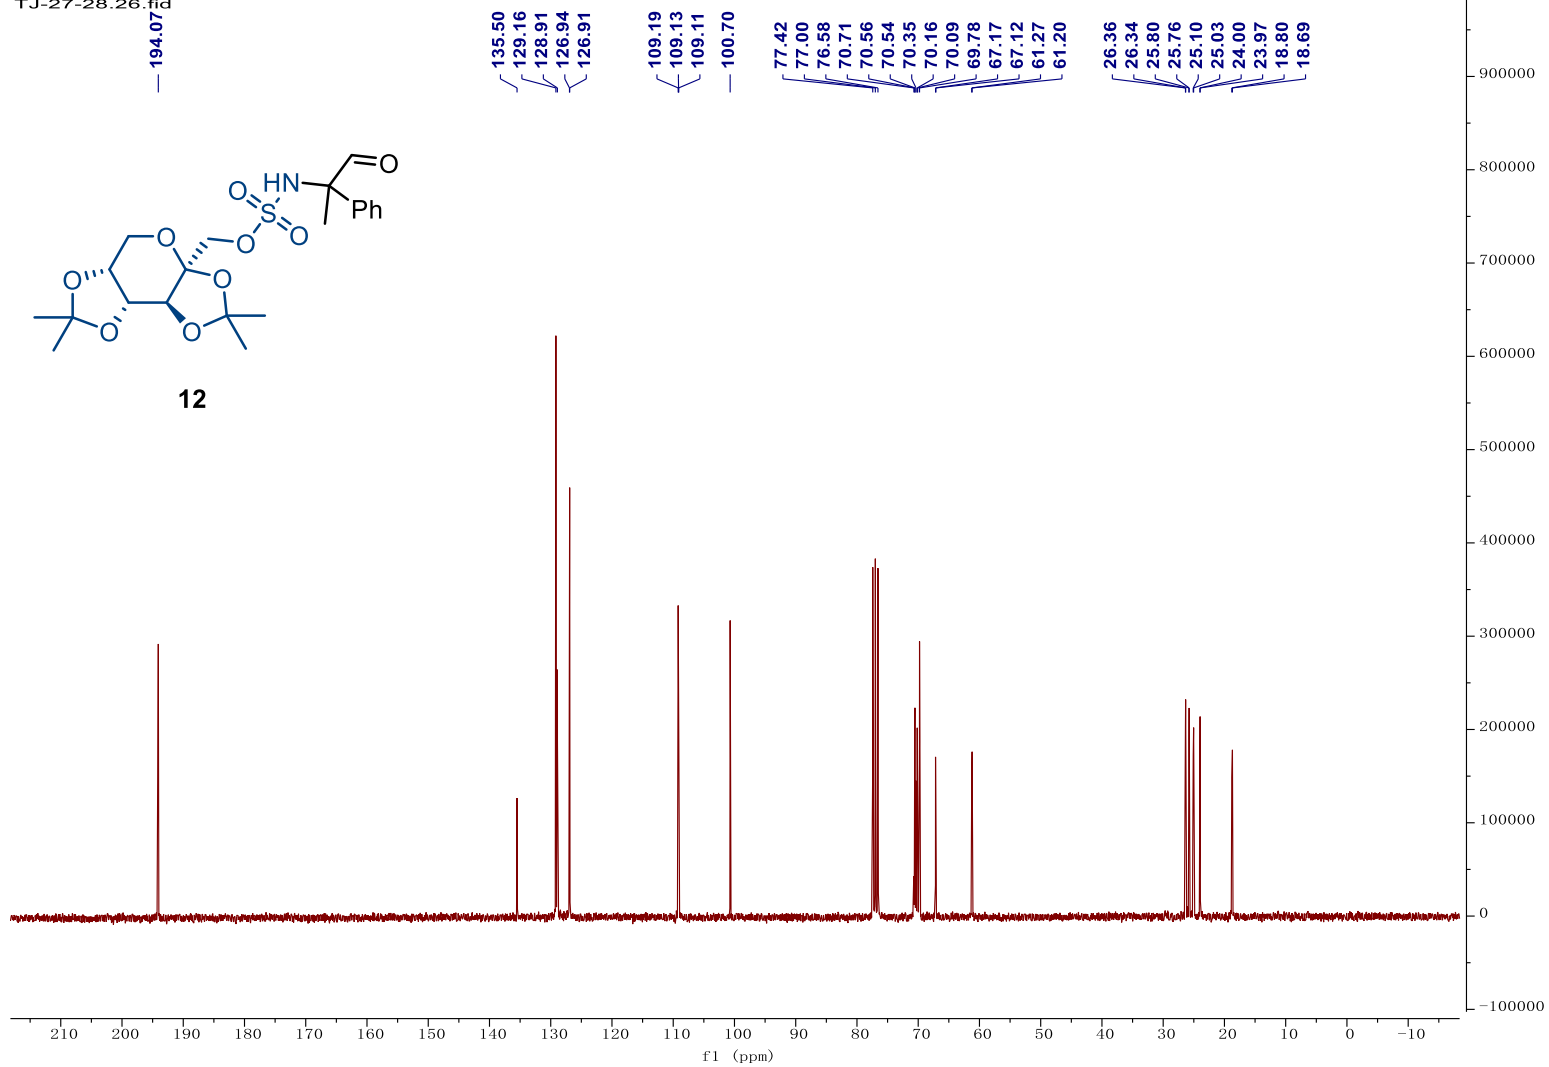

<sup>1</sup>H NMR spectrum of compound 13 (300 MHz, CDCl<sub>3</sub>)

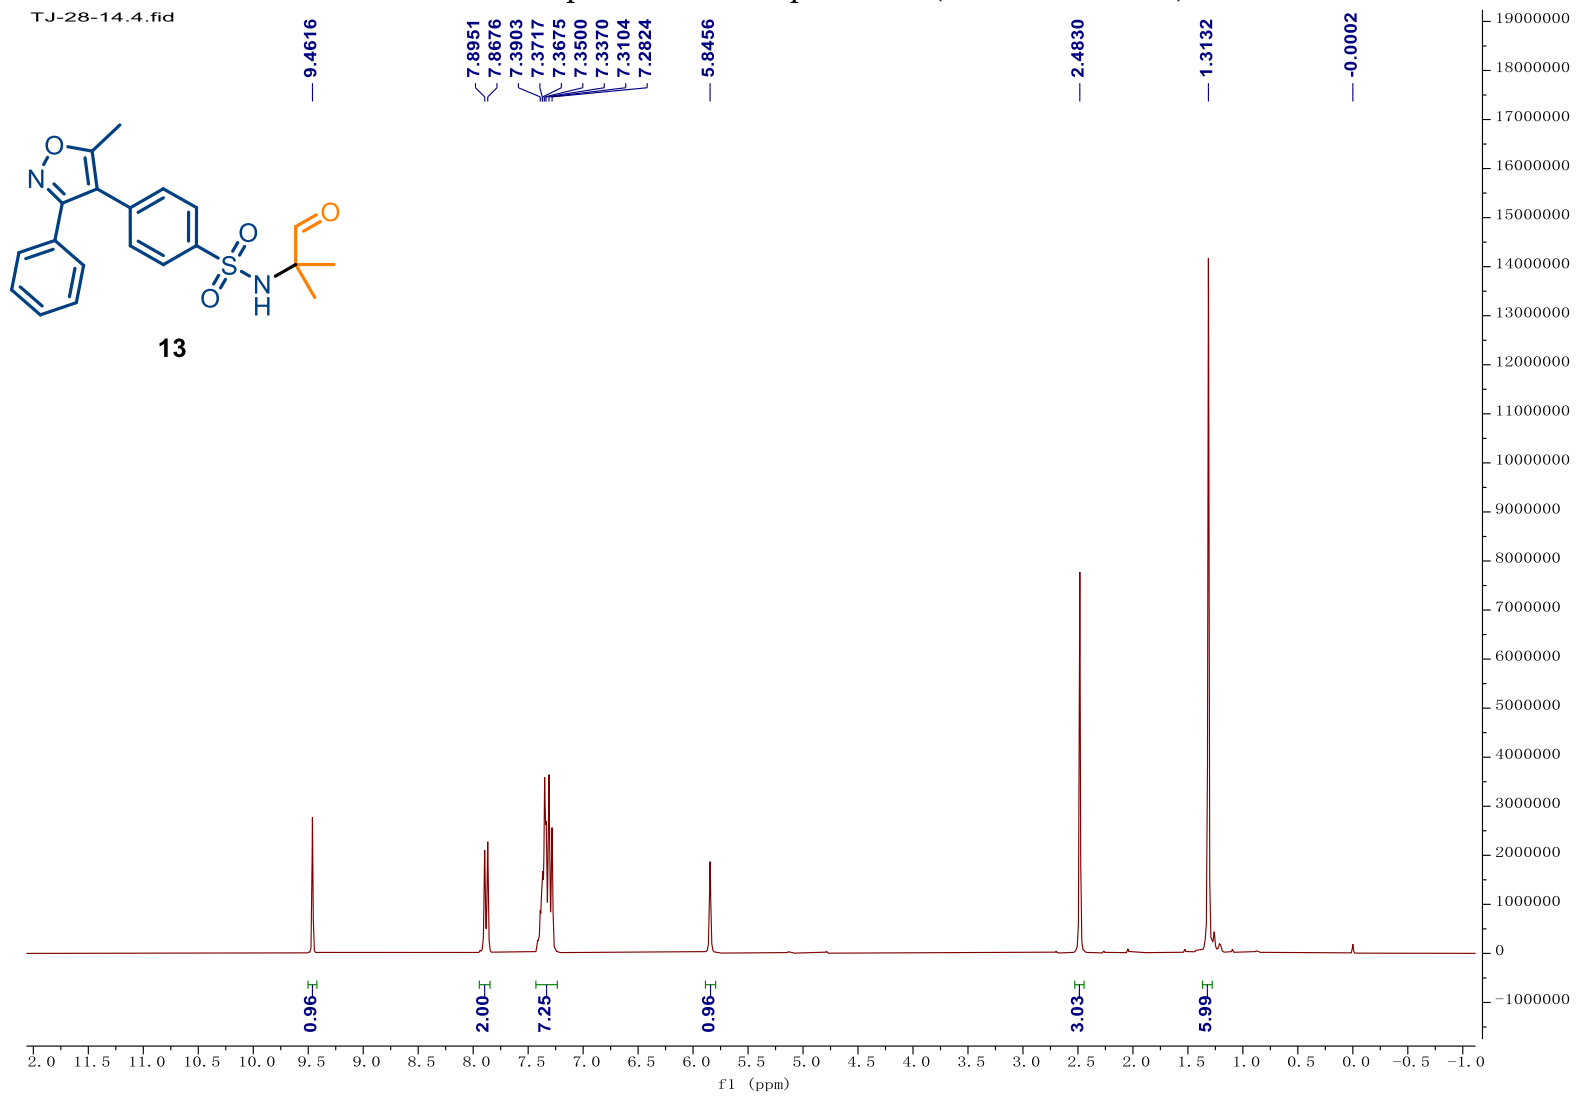

<sup>13</sup>C NMR spectrum of compound 13 (75 MHz, CDCl<sub>3</sub>)

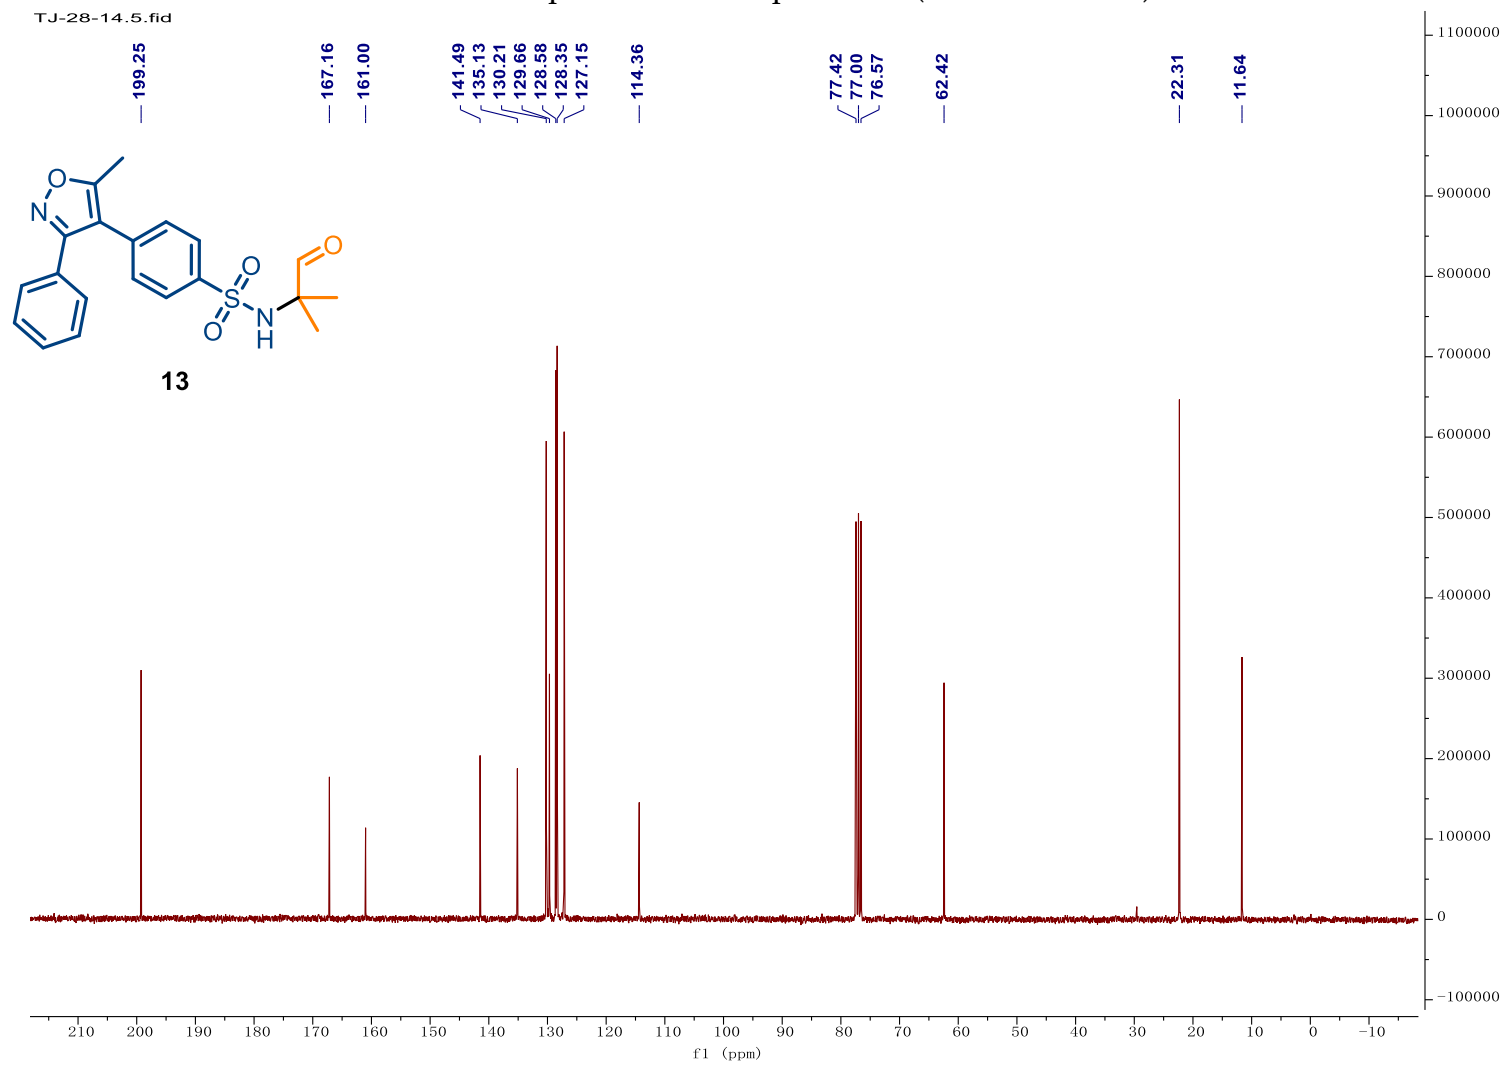

<sup>1</sup>H NMR spectrum of compound 14 (300 MHz, Acetone-d<sub>6</sub>)

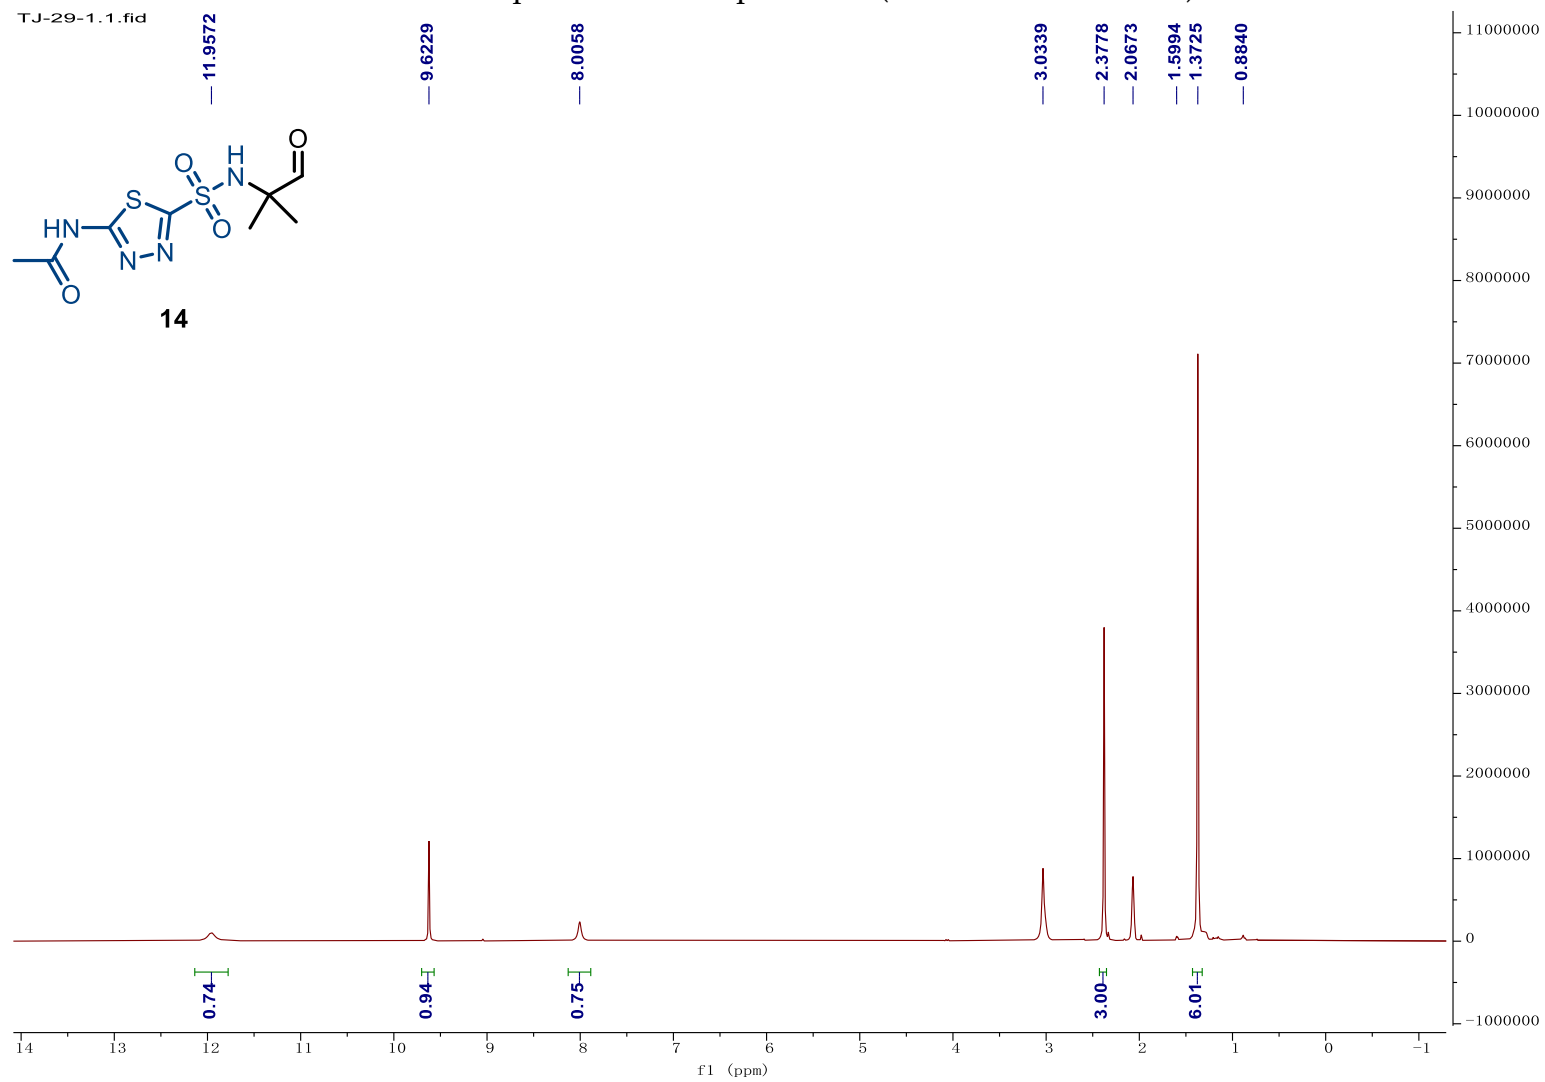

<sup>13</sup>C NMR spectrum of compound **14** (75 MHz, Acetone-*d*<sub>6</sub>)

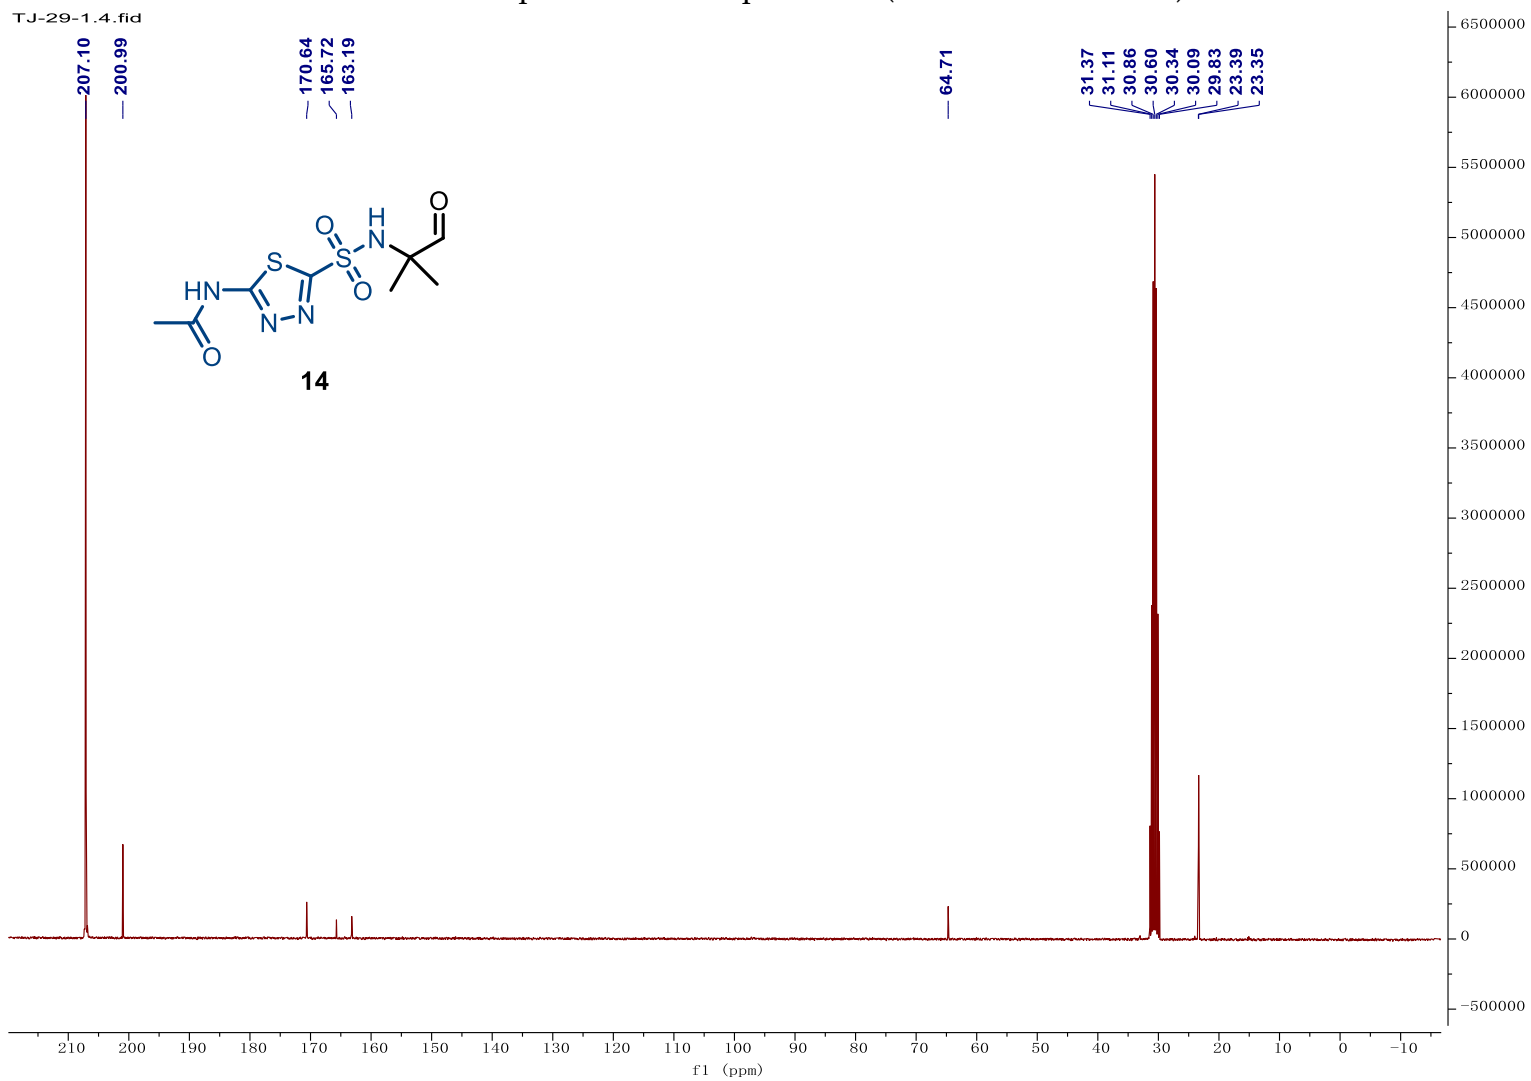

TJ-28-16.17.fid

### <sup>1</sup>H NMR spectrum of compound 15 (300 MHz, DMSO-d<sub>6</sub>)

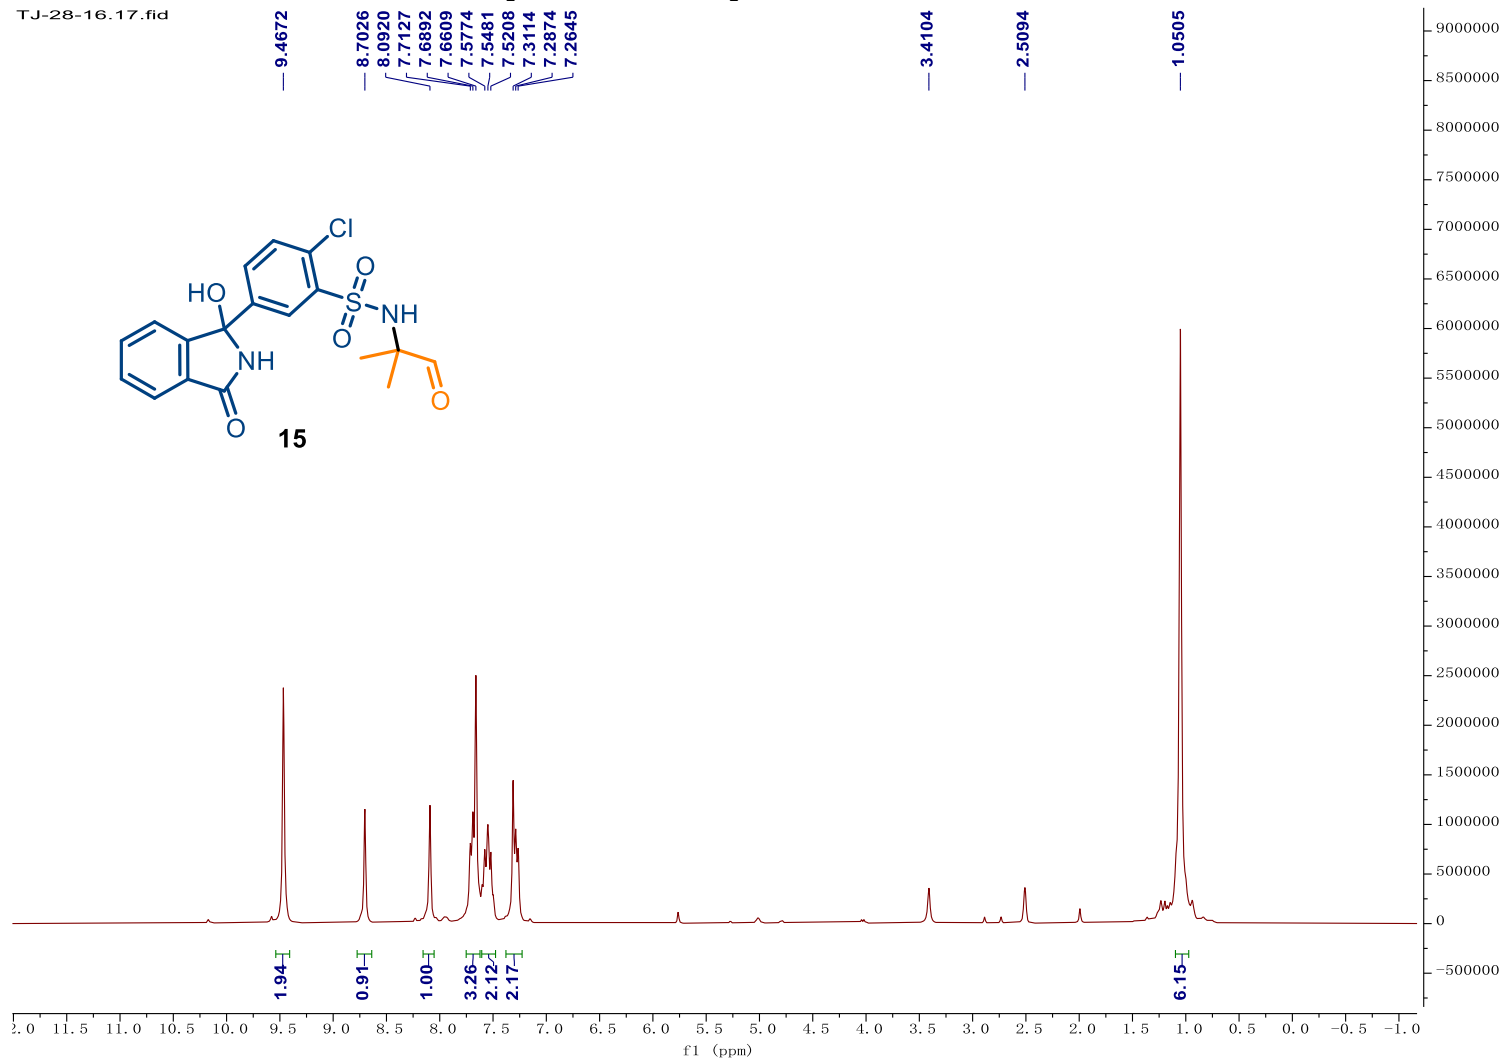

<sup>13</sup>C NMR spectrum of compound 15 (75 MHz, DMSO-d<sub>6</sub>)

TJ-28-16.18.fid

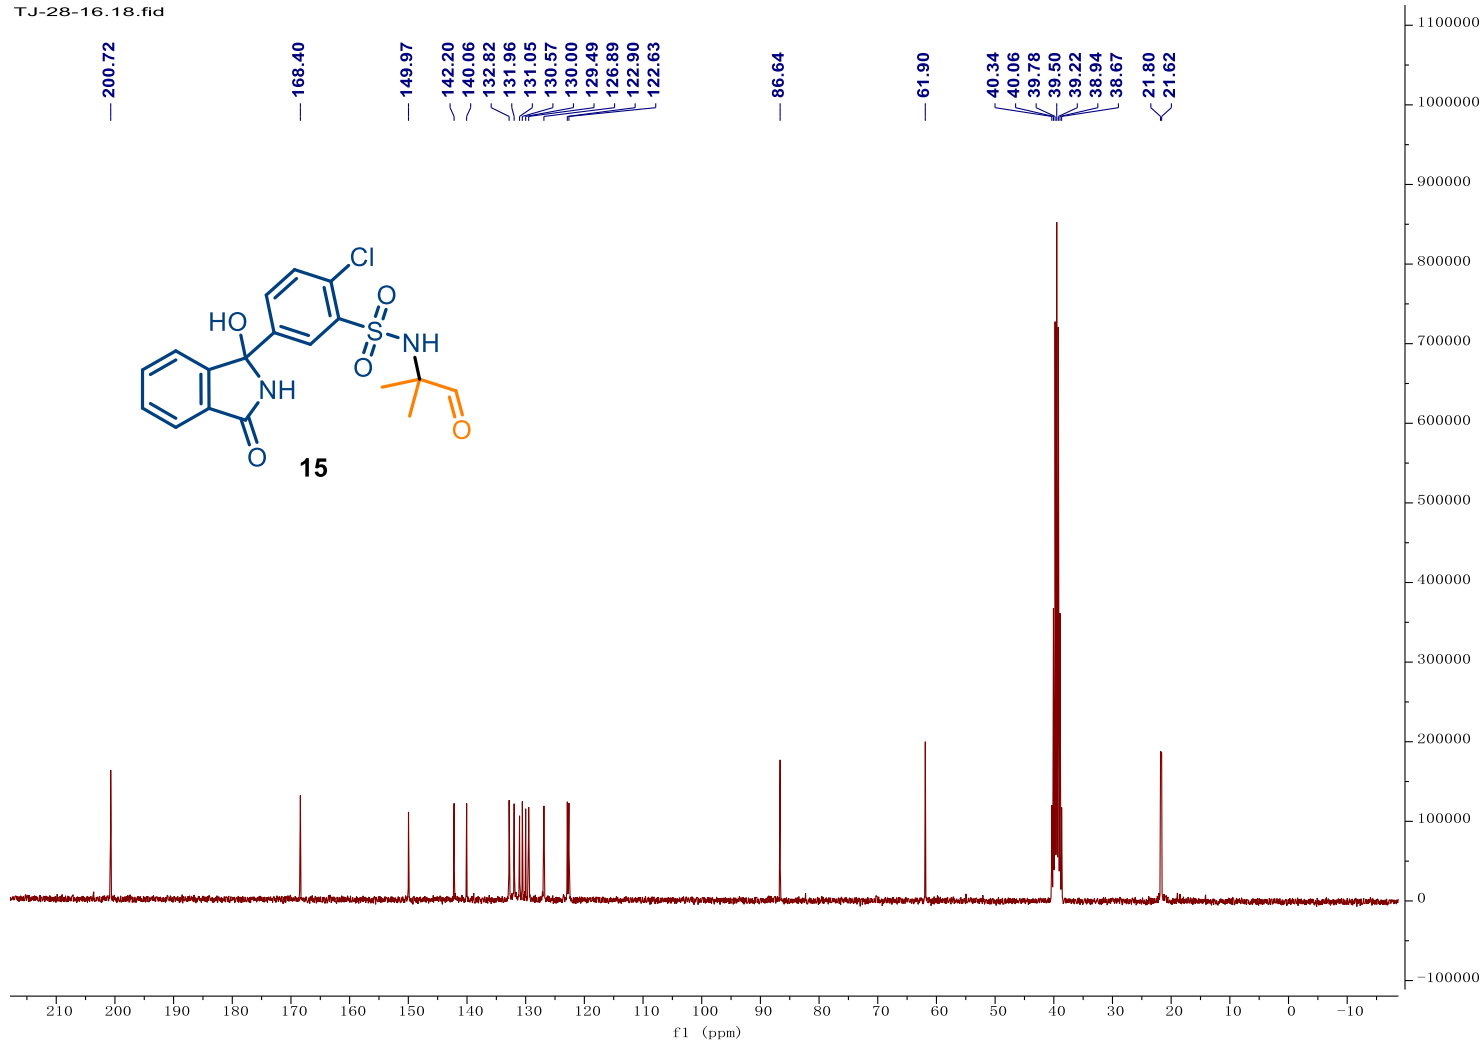

<sup>1</sup>H NMR spectrum of compound **16** (300 MHz, CDCl<sub>3</sub>)

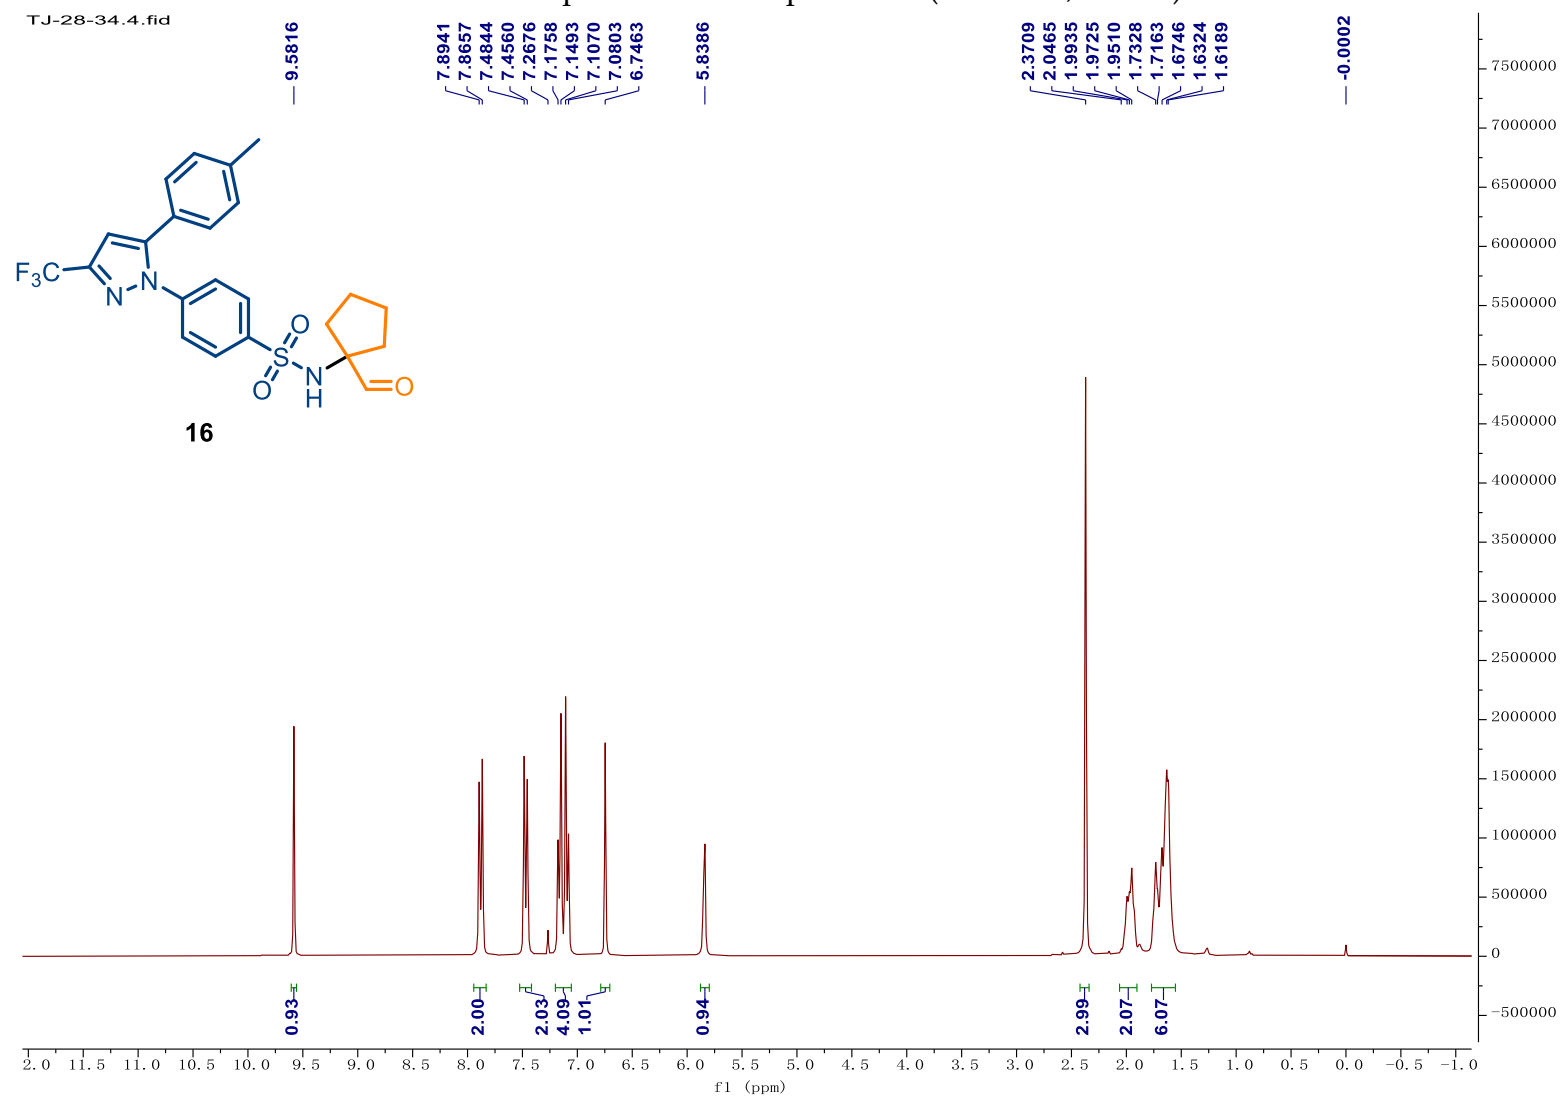

<sup>13</sup>C NMR spectrum of compound 16 (75 MHz, CDCl<sub>3</sub>)

TJ-28-34.5.fid

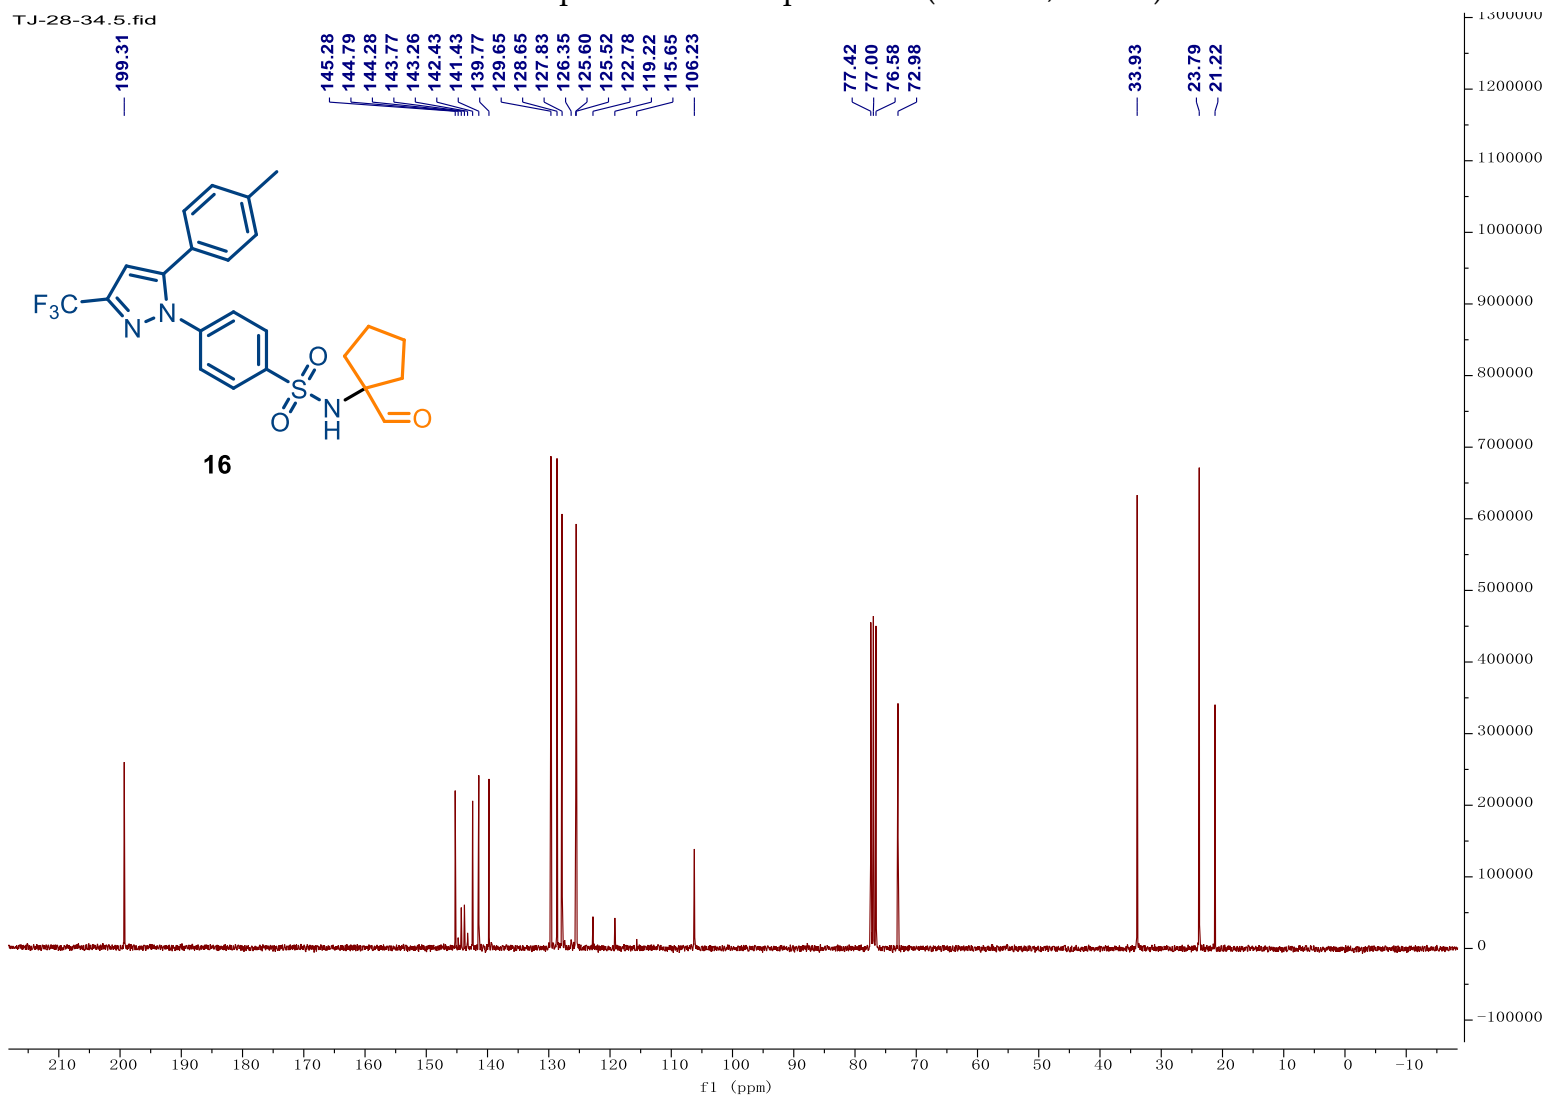

<sup>19</sup>F NMR spectrum of compound **16** (376 MHz, CDCl<sub>3</sub>)

y-28-34.1.fid  
F19CPD

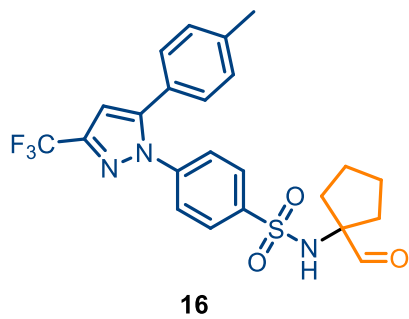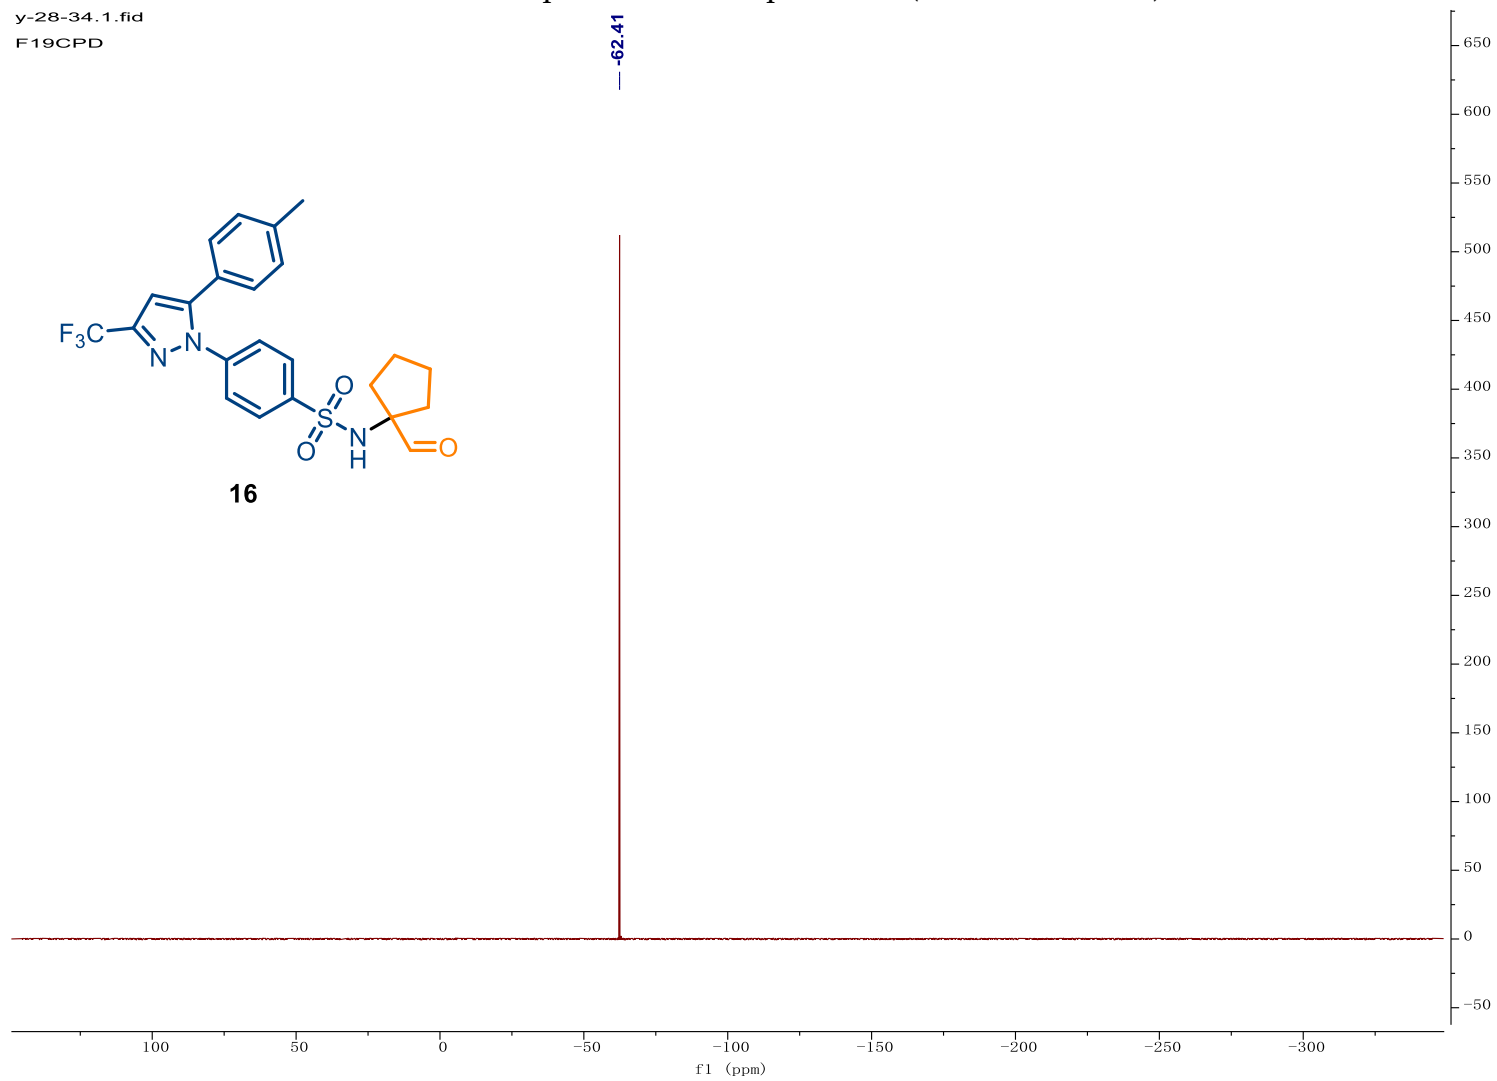

<sup>1</sup>H NMR spectrum of compound 17 (300 MHz, CDCl<sub>3</sub>)

TJ-28-35.7.fid

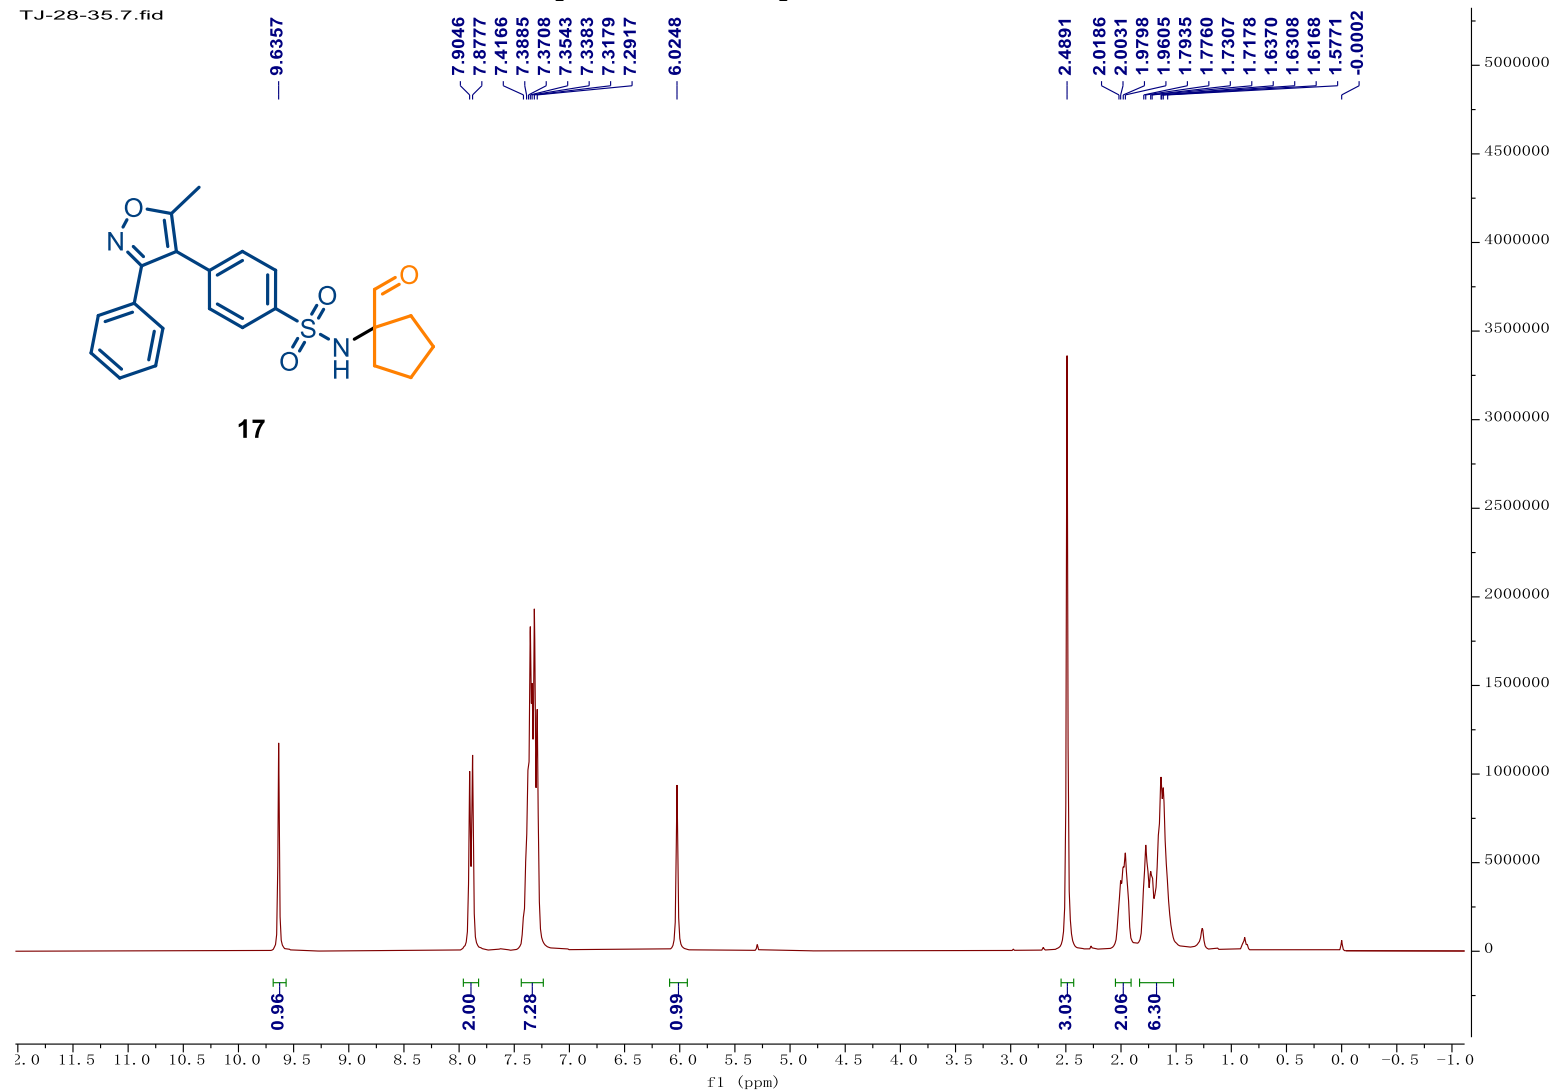

<sup>13</sup>C NMR spectrum of compound 17 (75 MHz, CDCl<sub>3</sub>)

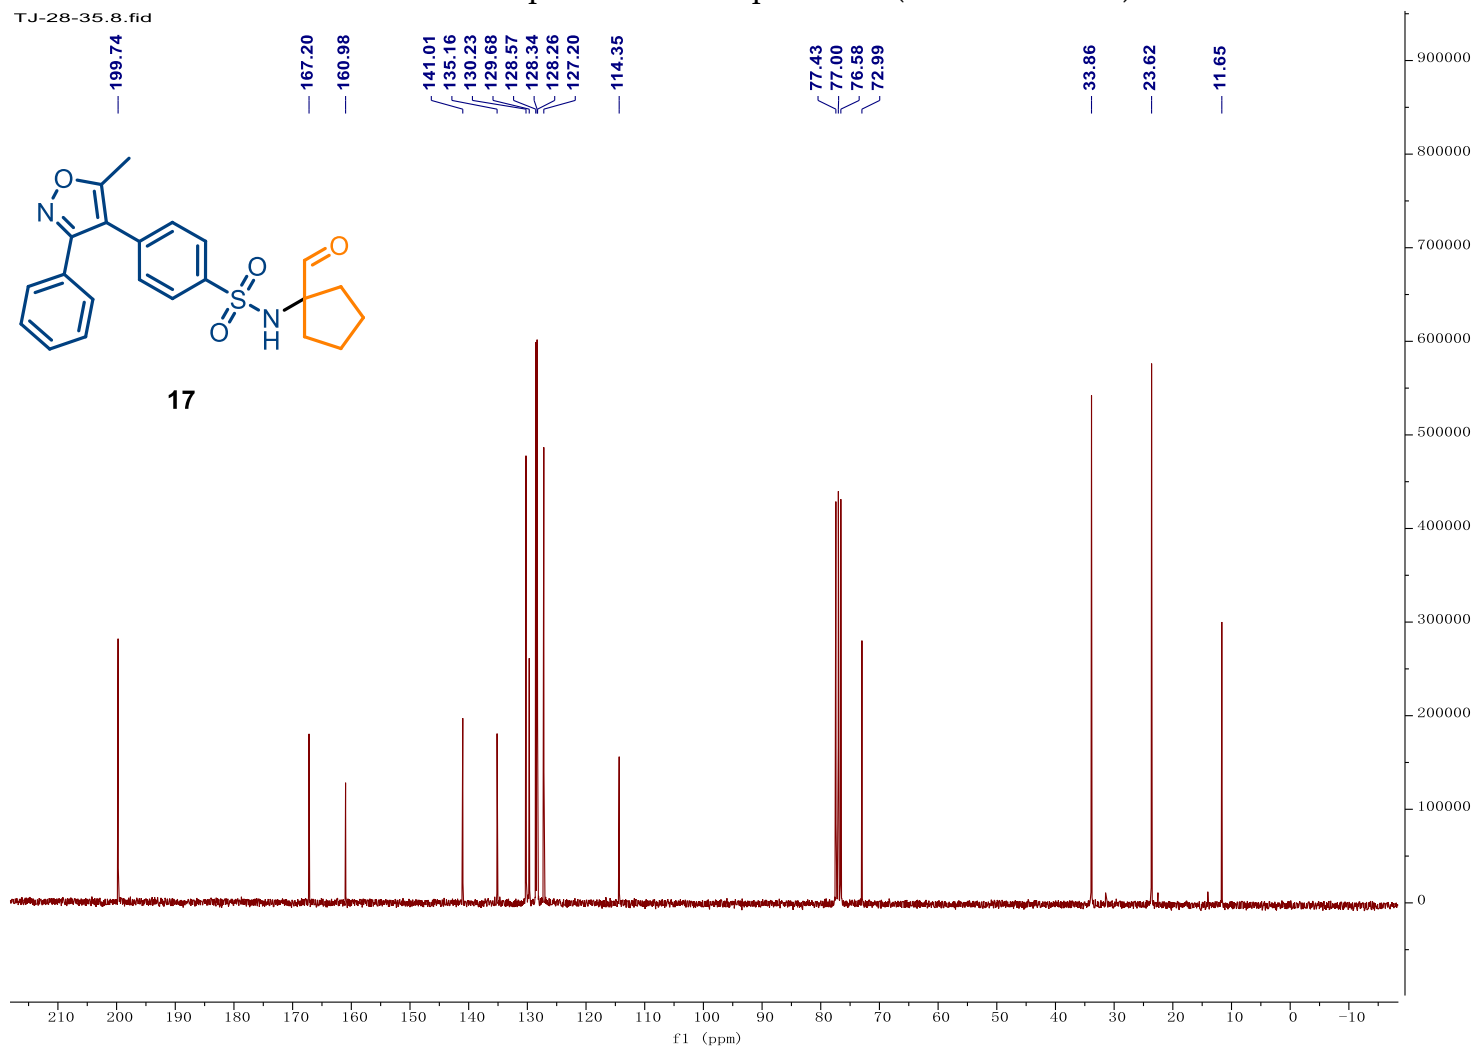

<sup>1</sup>H NMR spectrum of compound 18 (300 MHz, CDCl<sub>3</sub>)

TJ-28-36.1.fid

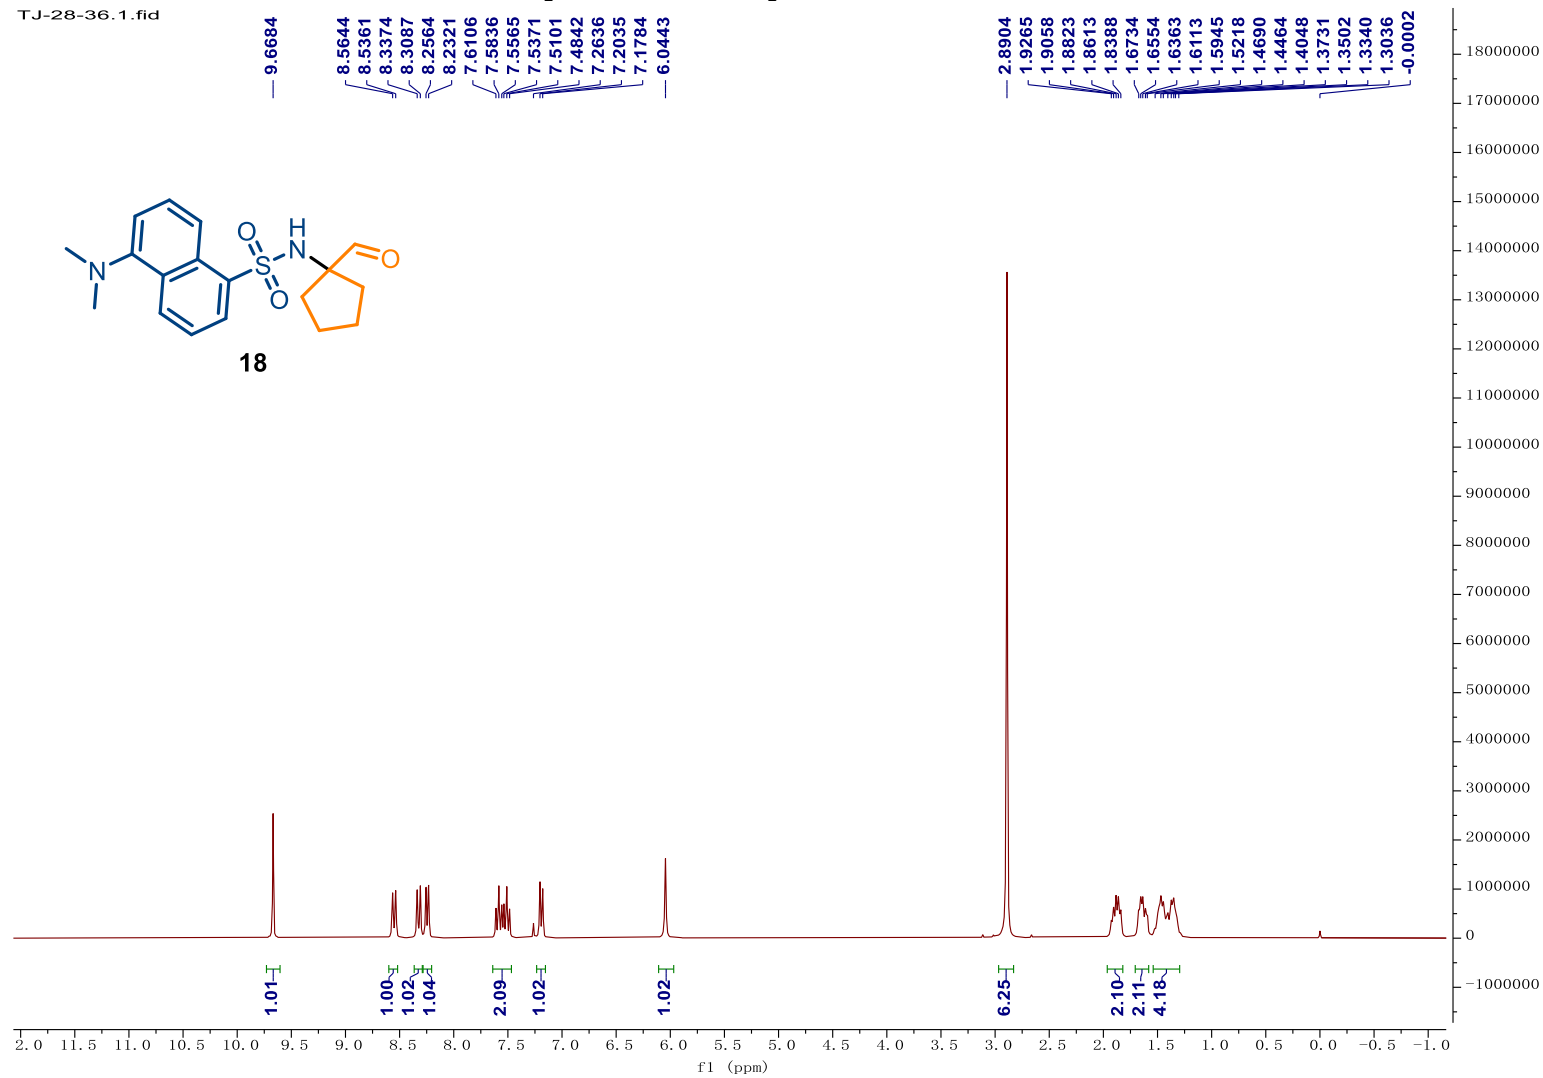

<sup>13</sup>C NMR spectrum of compound 18 (75 MHz, CDCl<sub>3</sub>)

TJ-28-36.2.fid

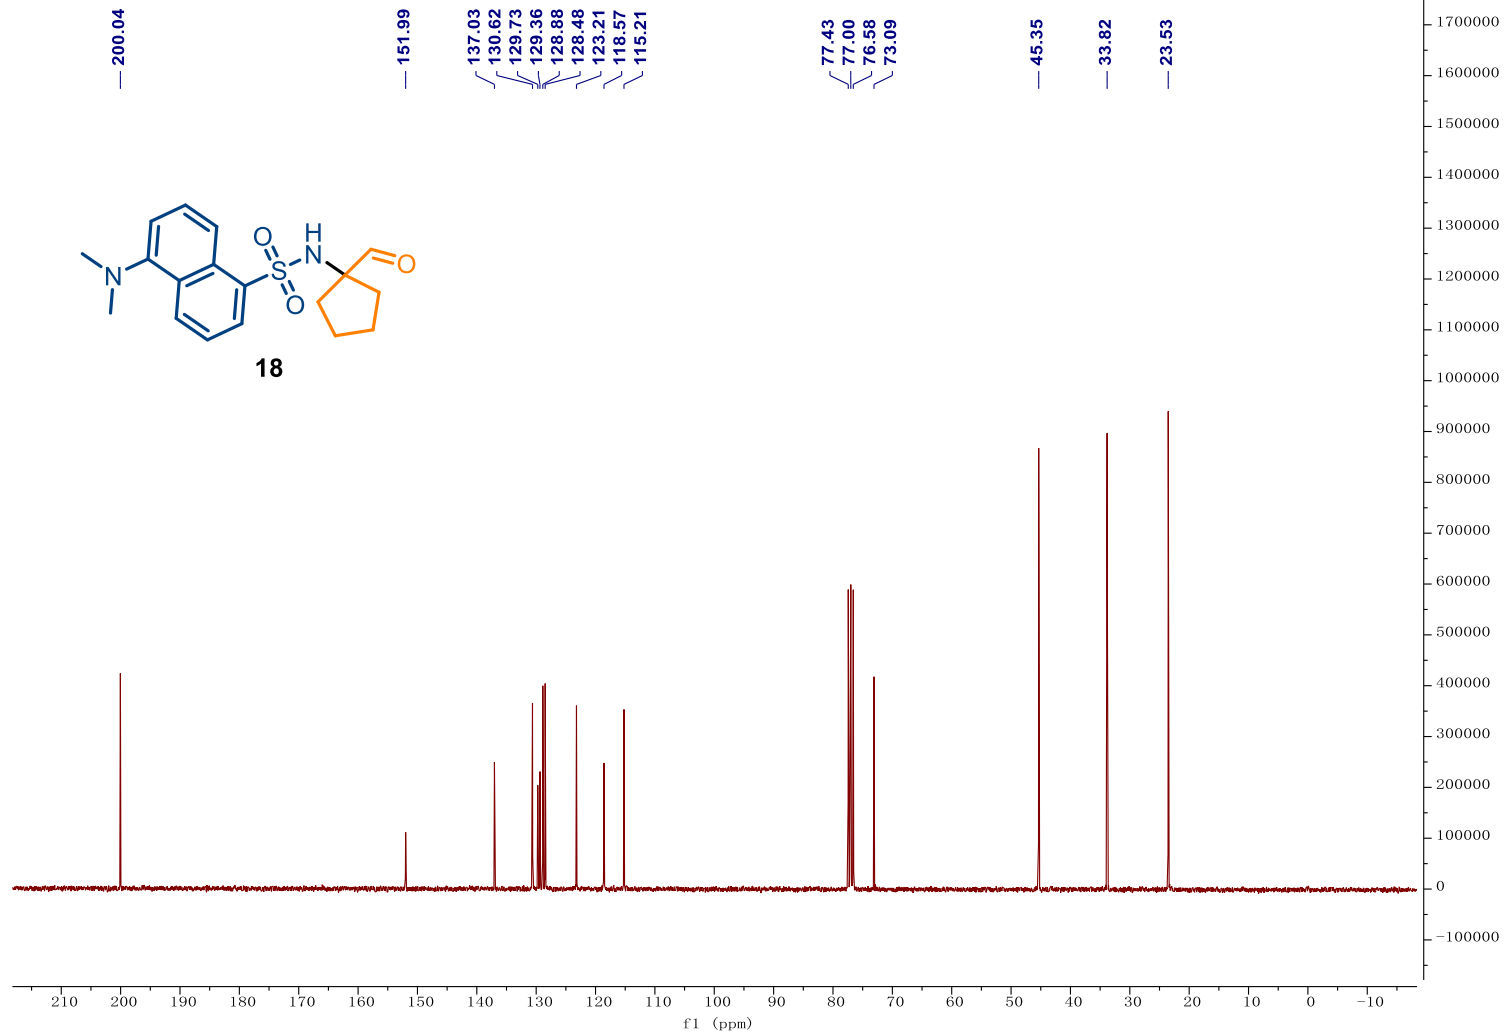

<sup>1</sup>H NMR spectrum of compound **19** (300 MHz, CDCl<sub>3</sub>)

TJ-28-37.4.fid

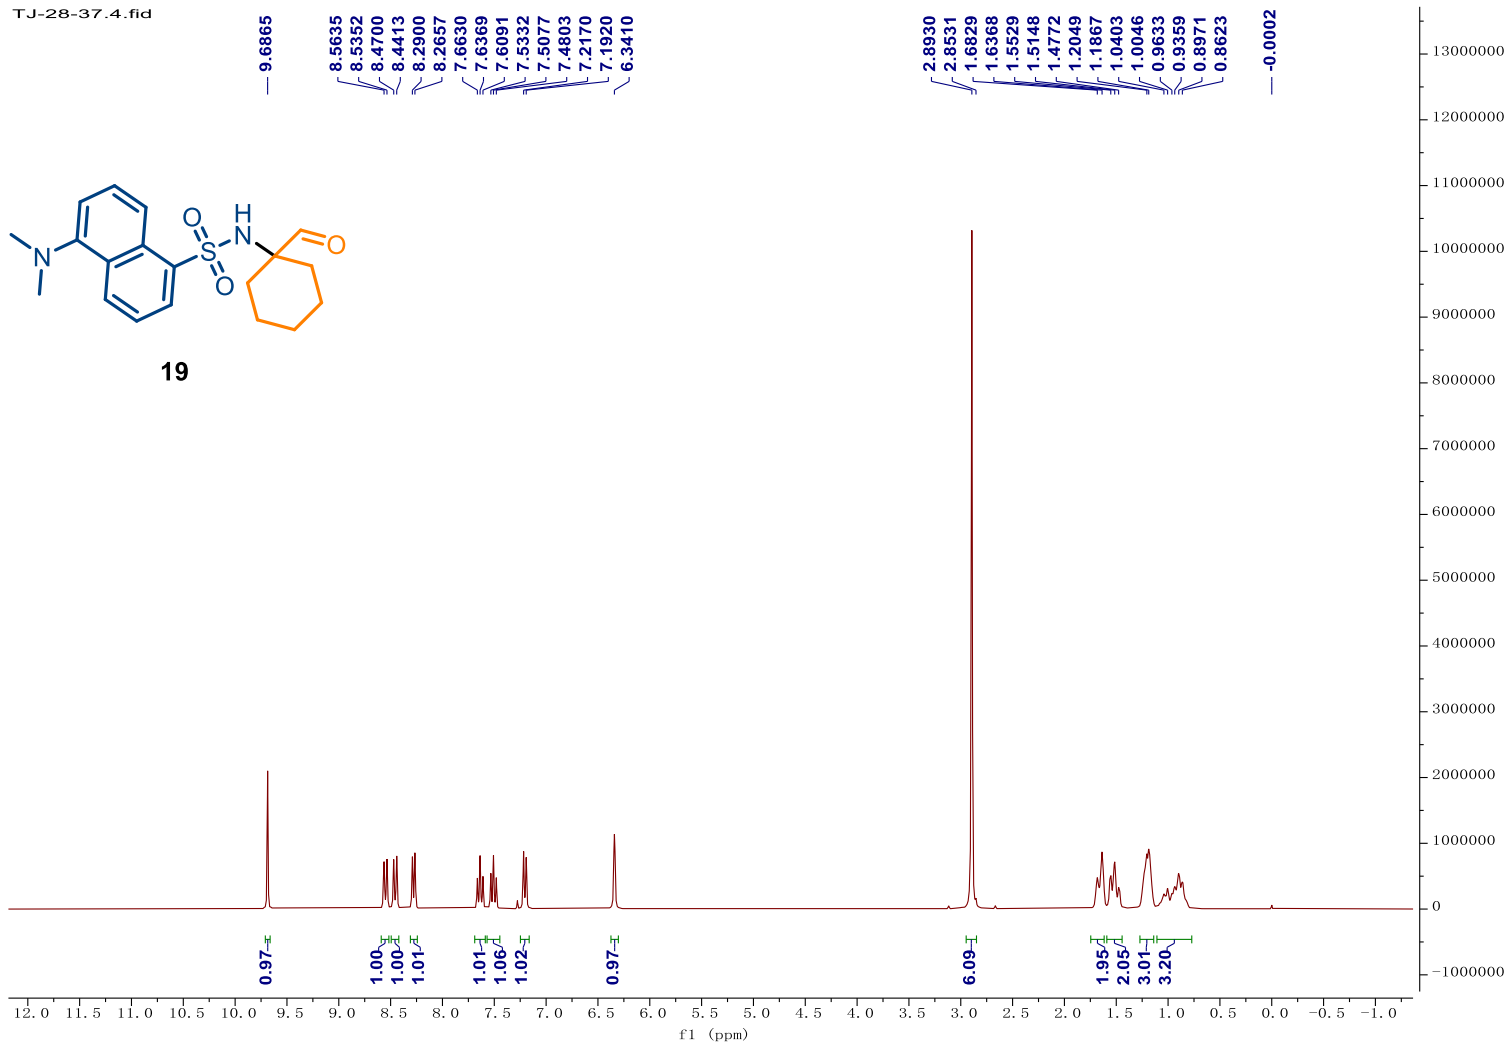

<sup>13</sup>C NMR spectrum of compound **19** (75 MHz, CDCl<sub>3</sub>)

TJ-28-37.5.fid

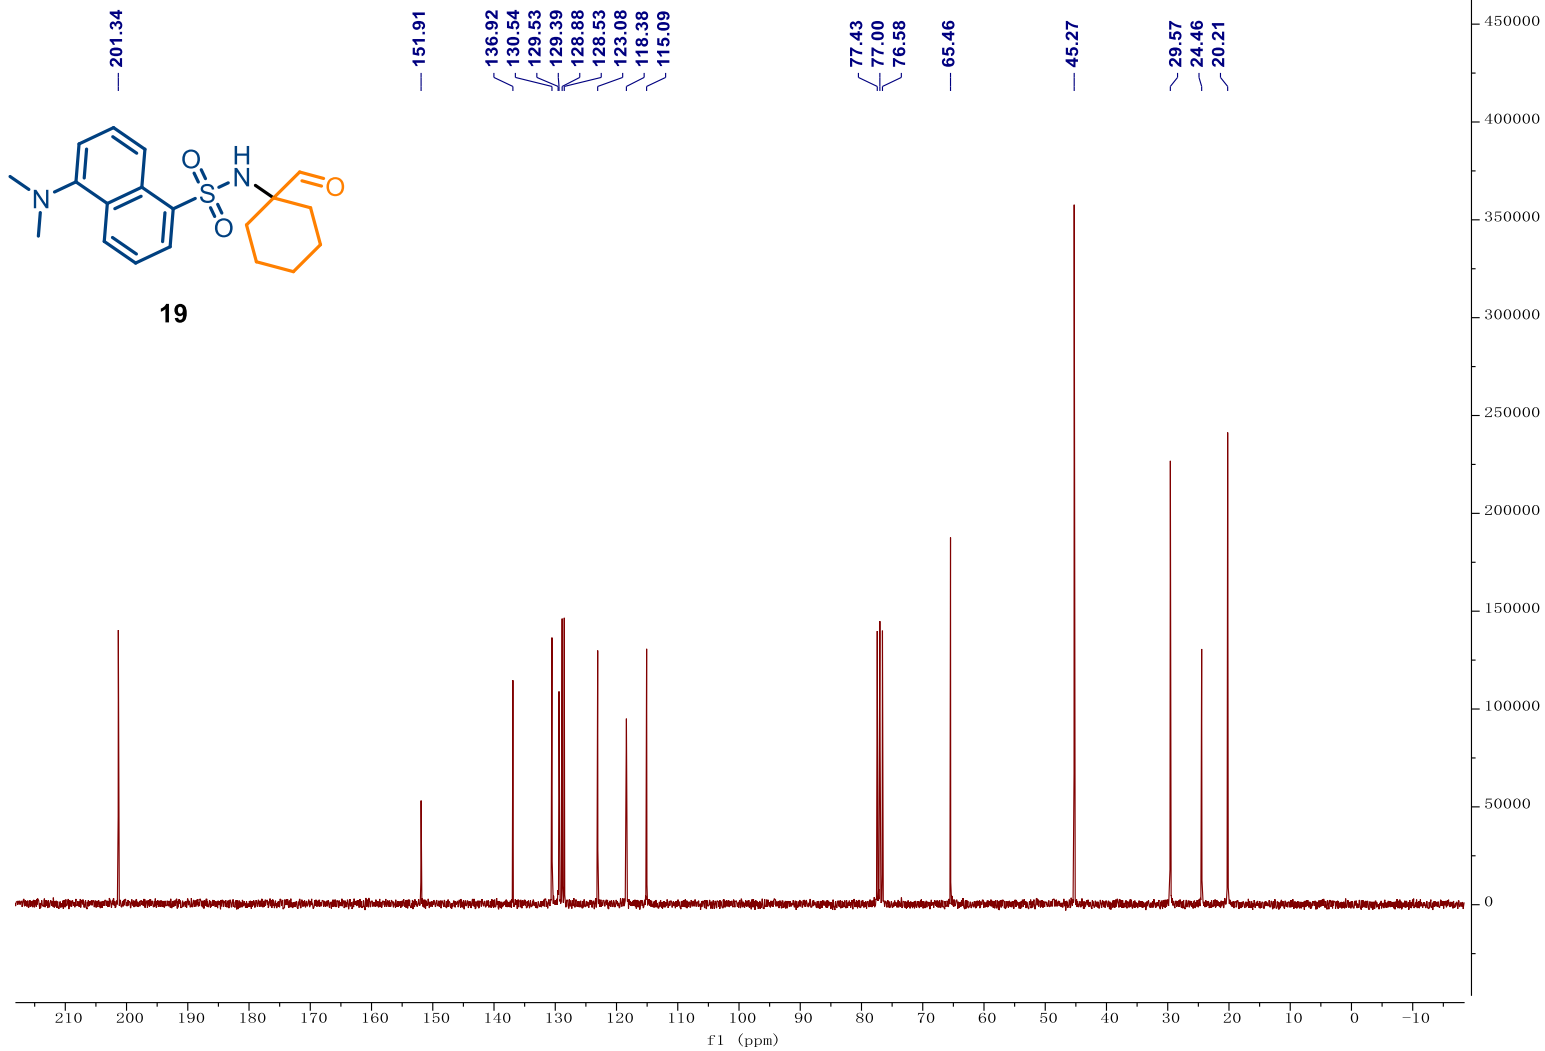

<sup>1</sup>H NMR spectrum of compound **20** (300 MHz, CDCl<sub>3</sub>)

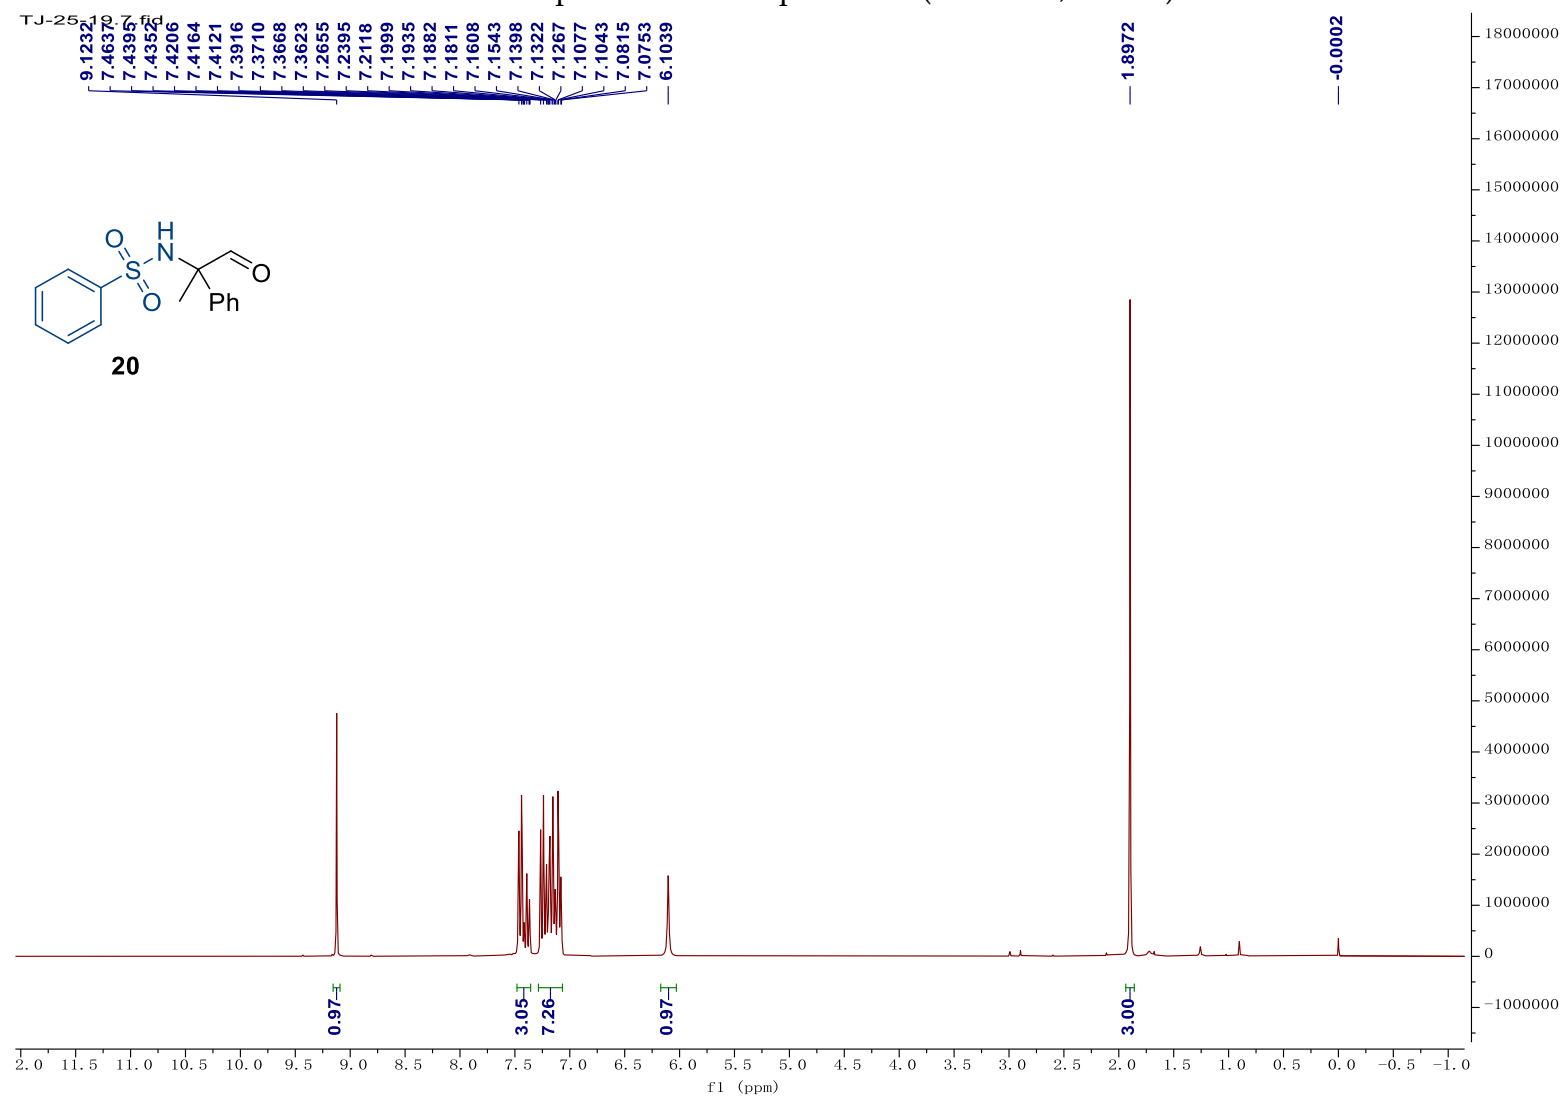

<sup>13</sup>C NMR spectrum of compound 20 (75 MHz, CDCl<sub>3</sub>)

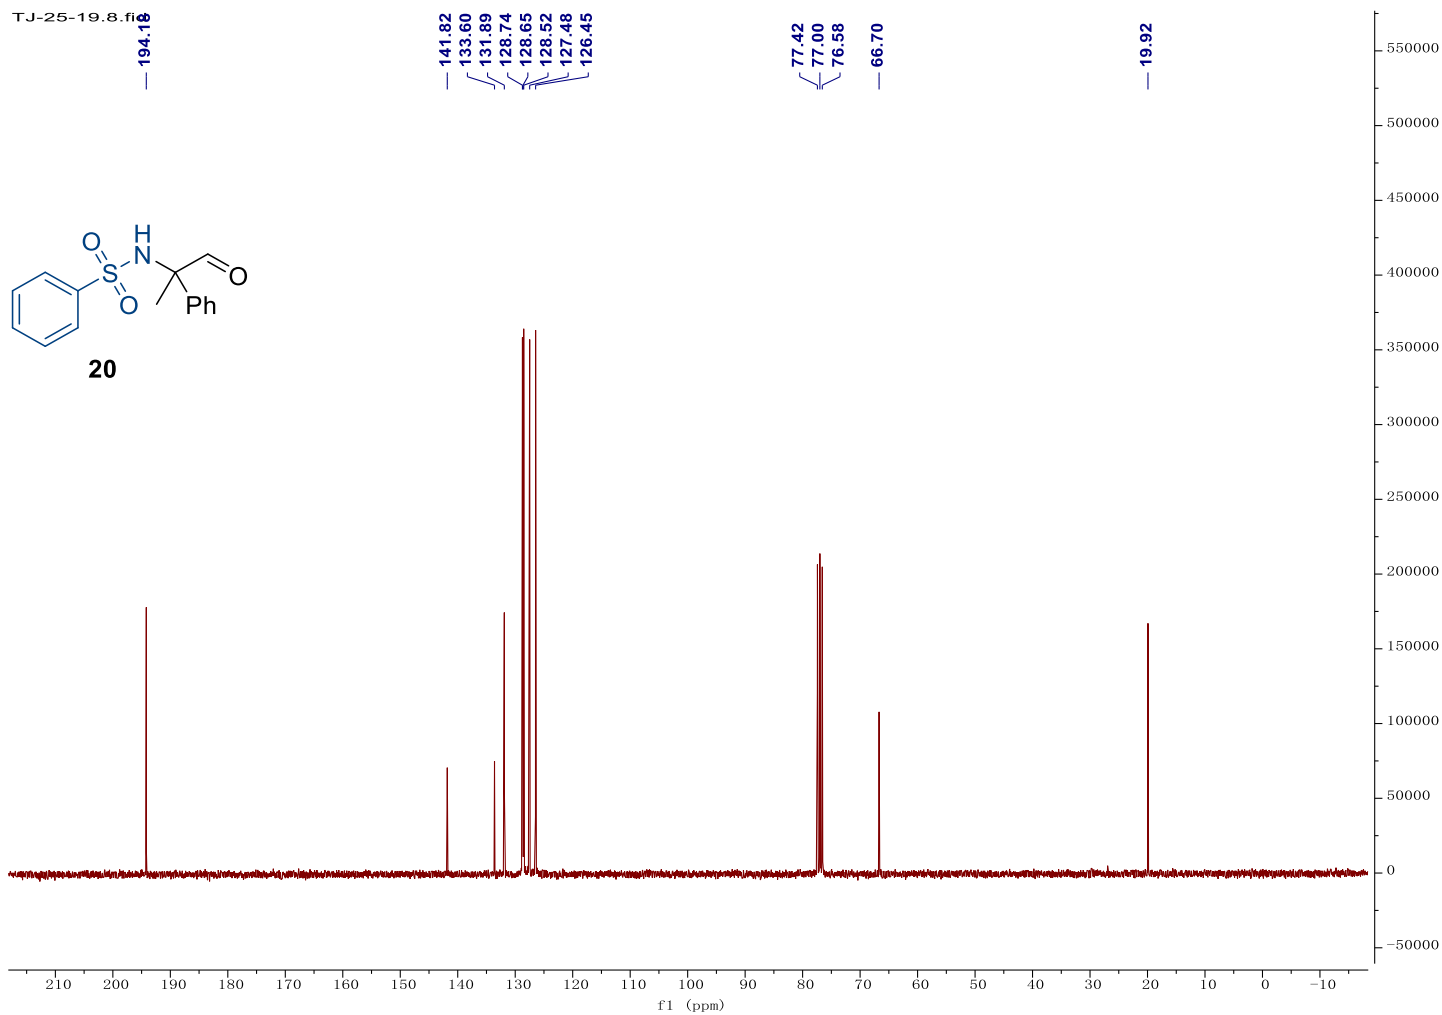

<sup>1</sup>H NMR spectrum of compound **21** (300 MHz, CDCl<sub>3</sub>)

TJ-26-11.9.fid

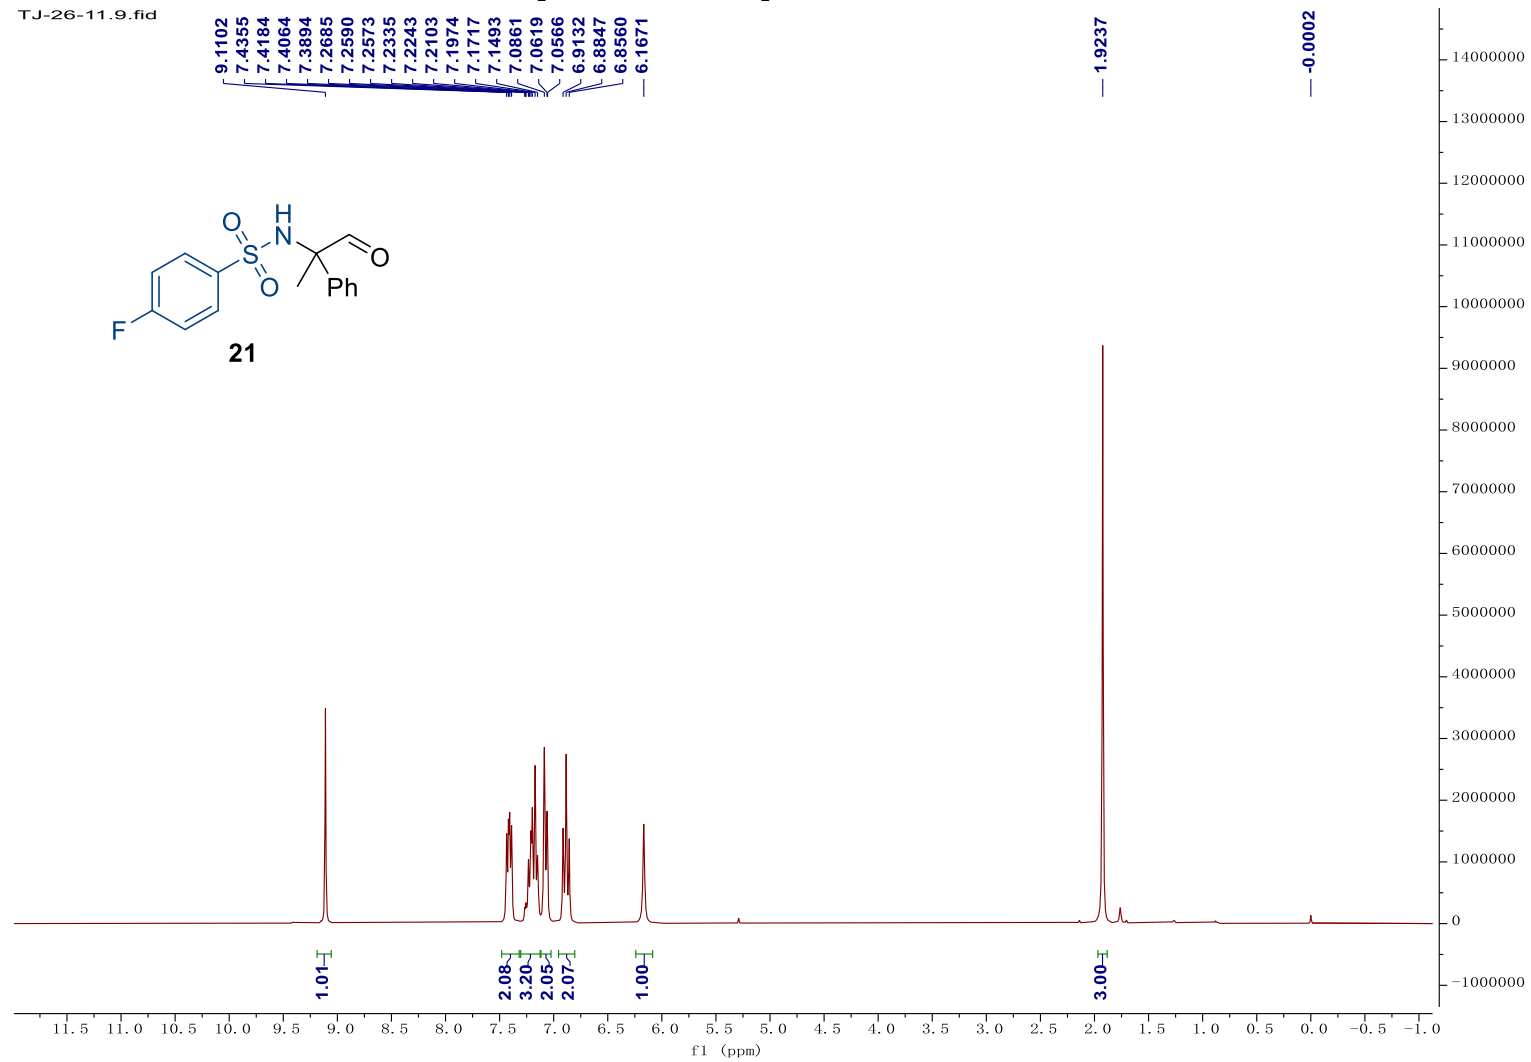

<sup>13</sup>C NMR spectrum of compound **21** (75 MHz, CDCl<sub>3</sub>)

TJ-26-1111.fid

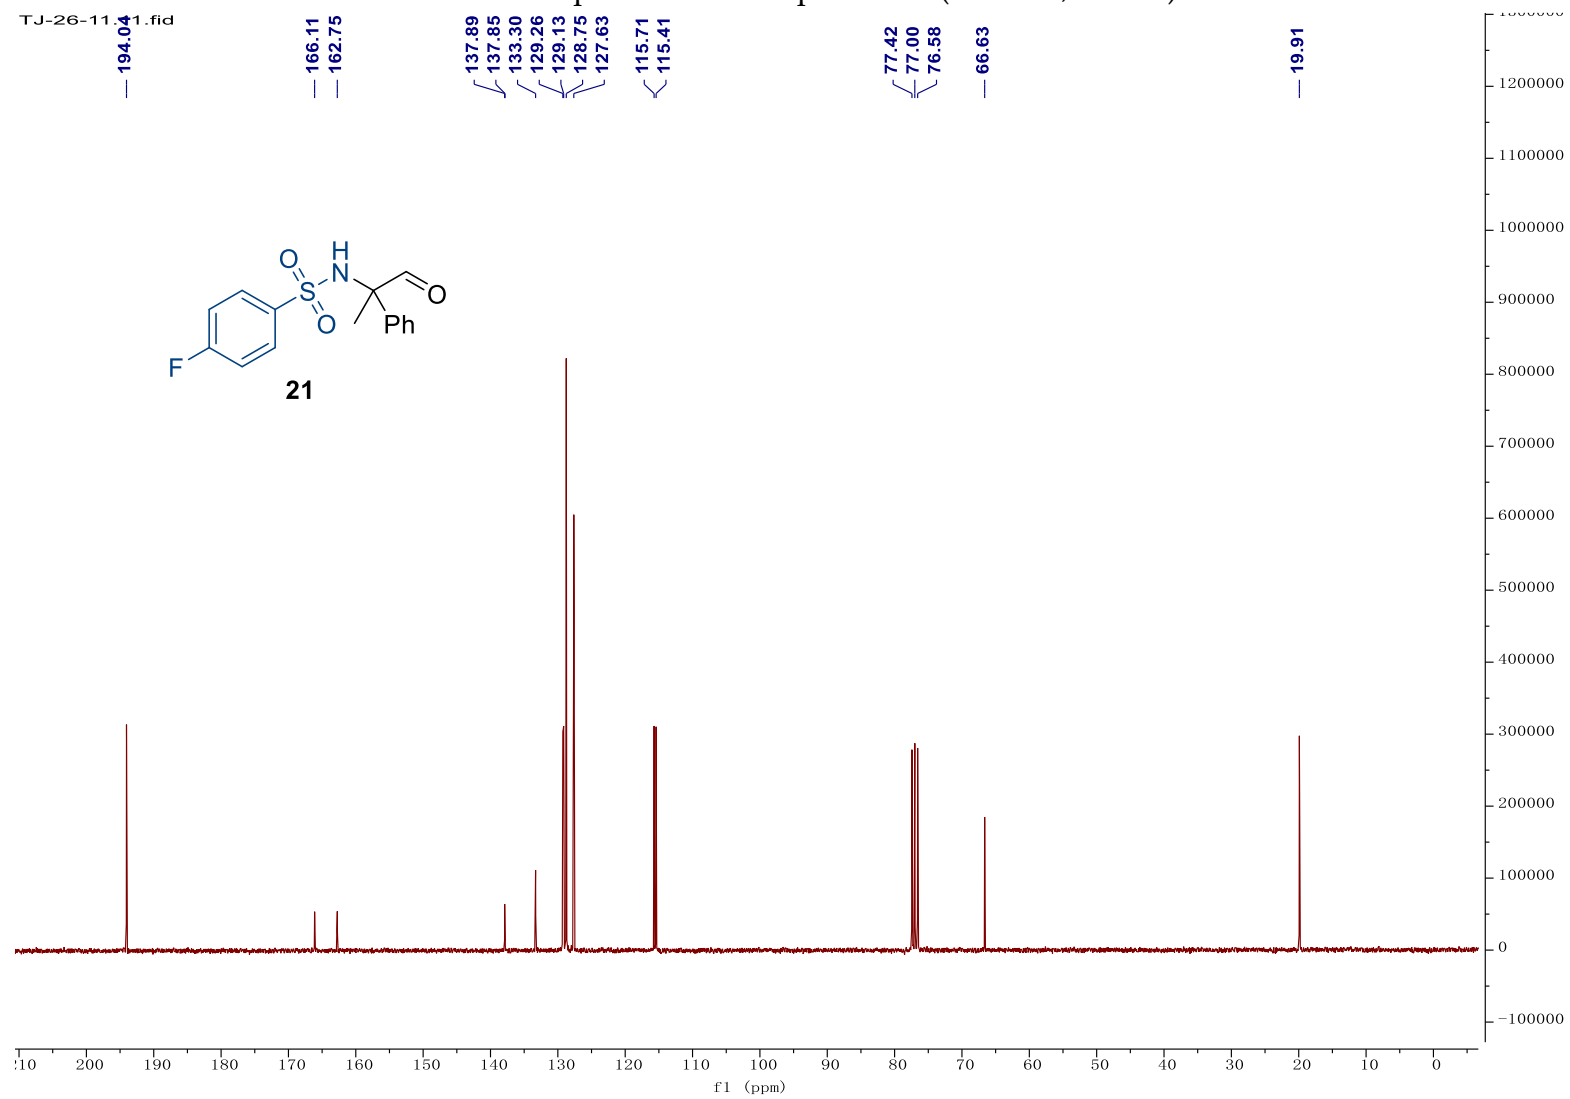

<sup>19</sup>F NMR spectrum of compound **21** (282 MHz, CDCl<sub>3</sub>)

TJ-26-11.10.fid

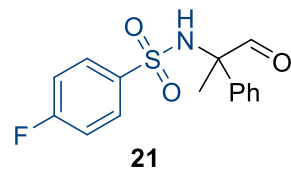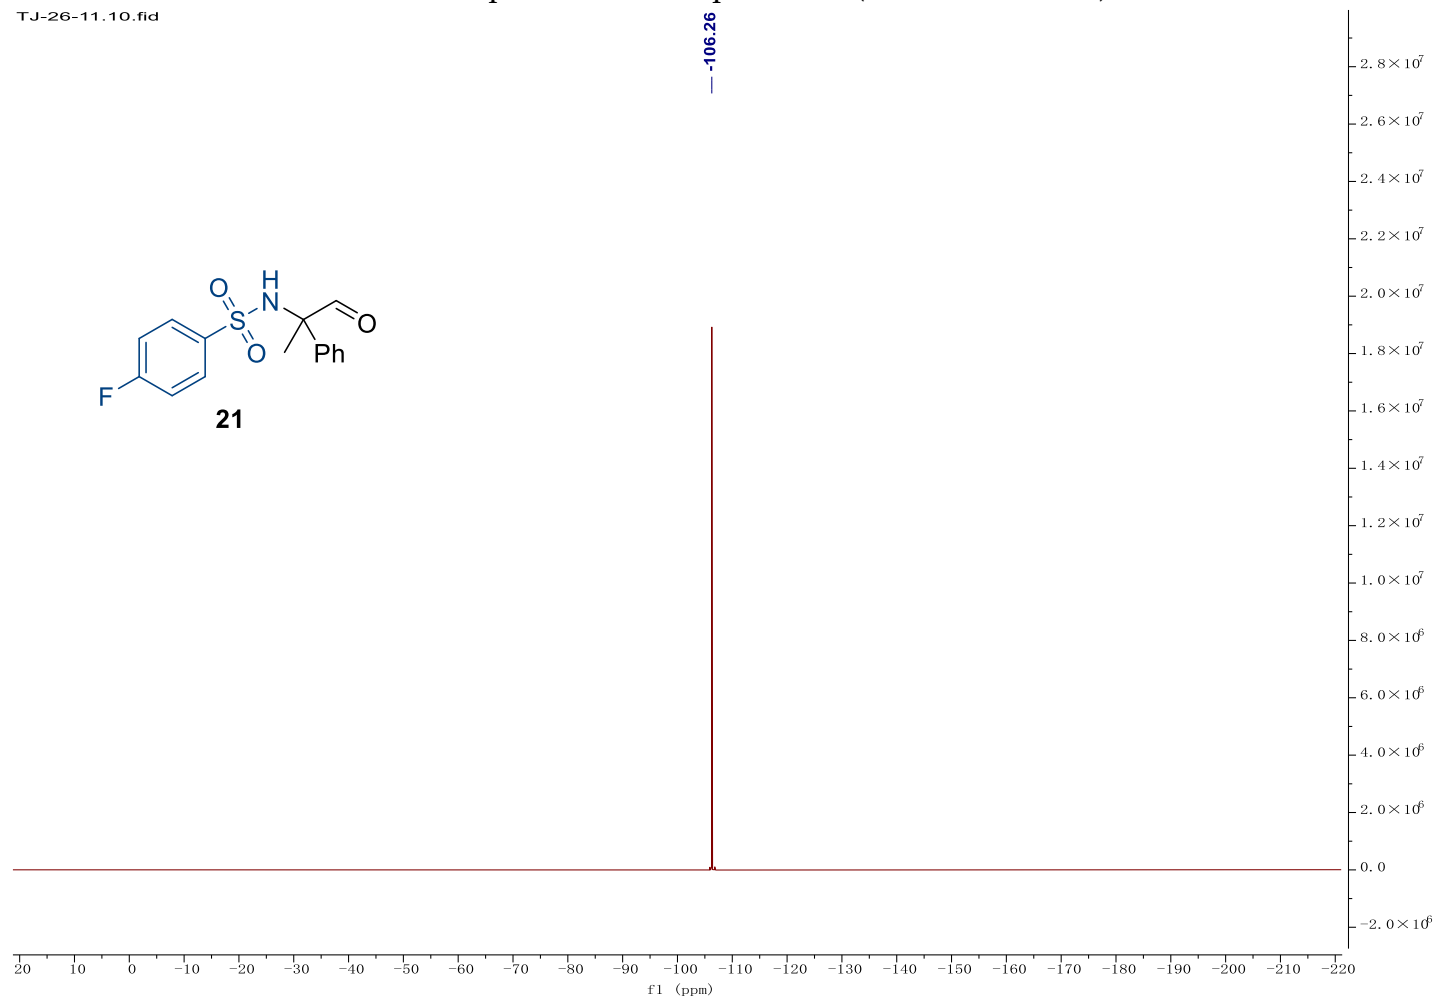

<sup>1</sup>H NMR spectrum of compound 22 (300 MHz, CDCl<sub>3</sub>)

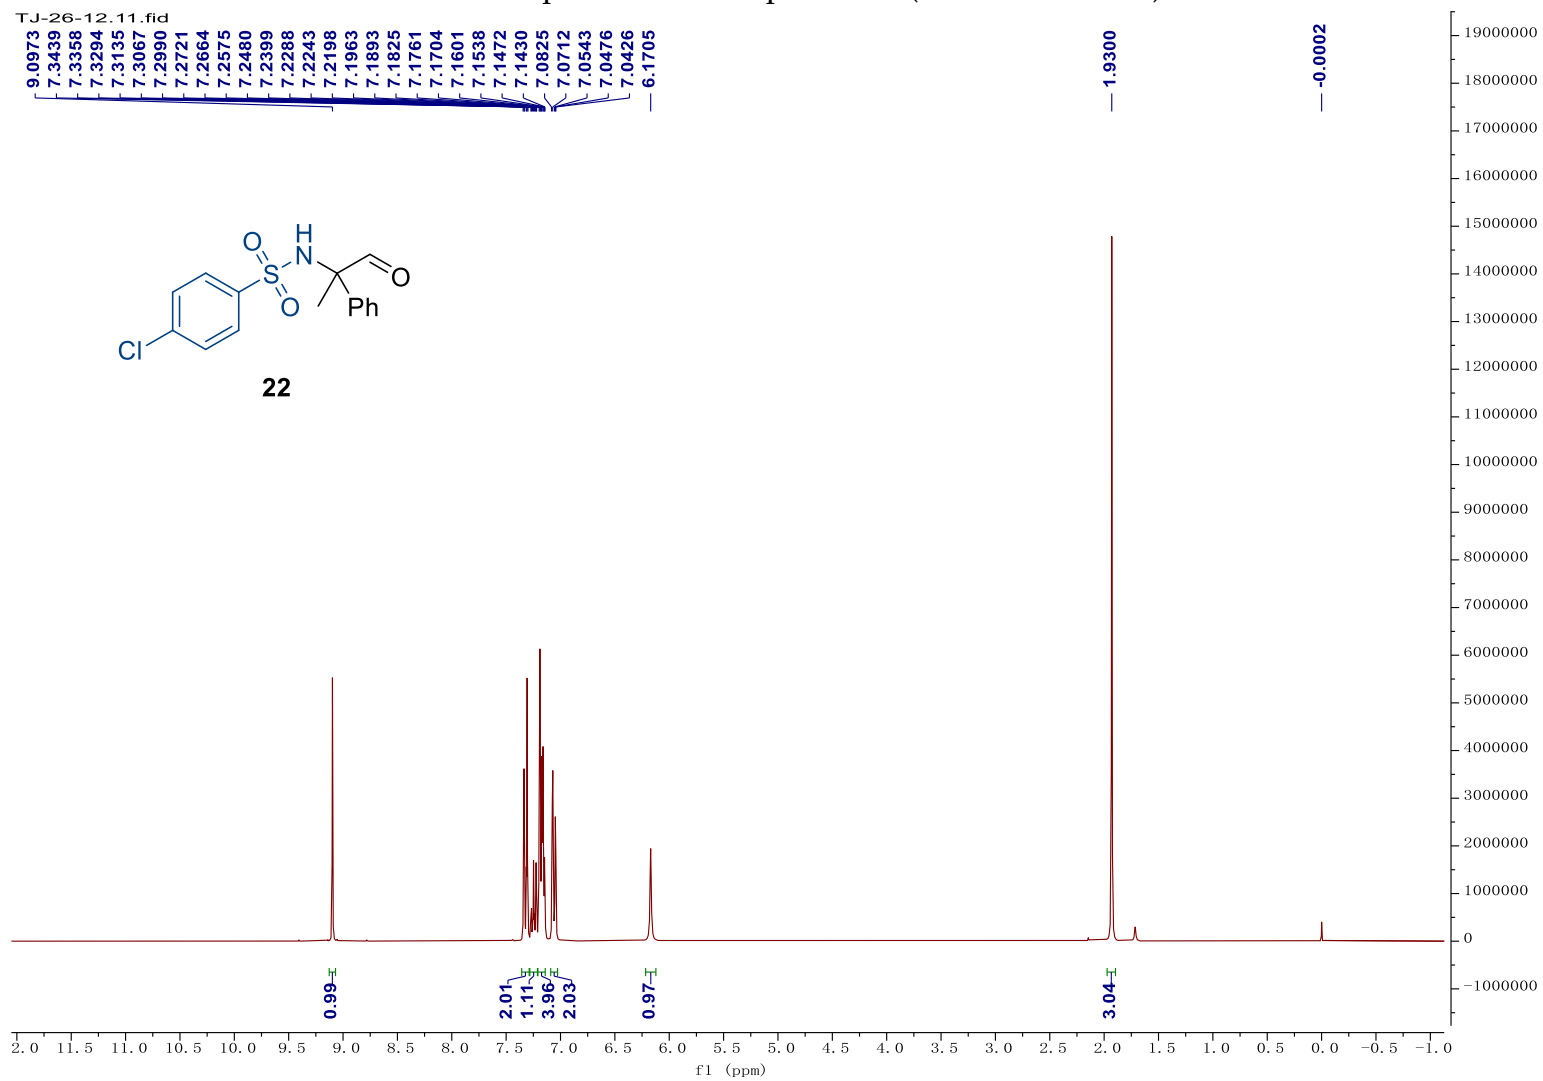

<sup>13</sup>C NMR spectrum of compound **22** (75 MHz, CDCl<sub>3</sub>)

TJ-26-12.12.fid

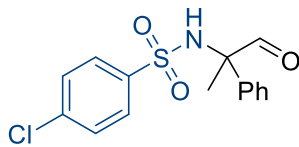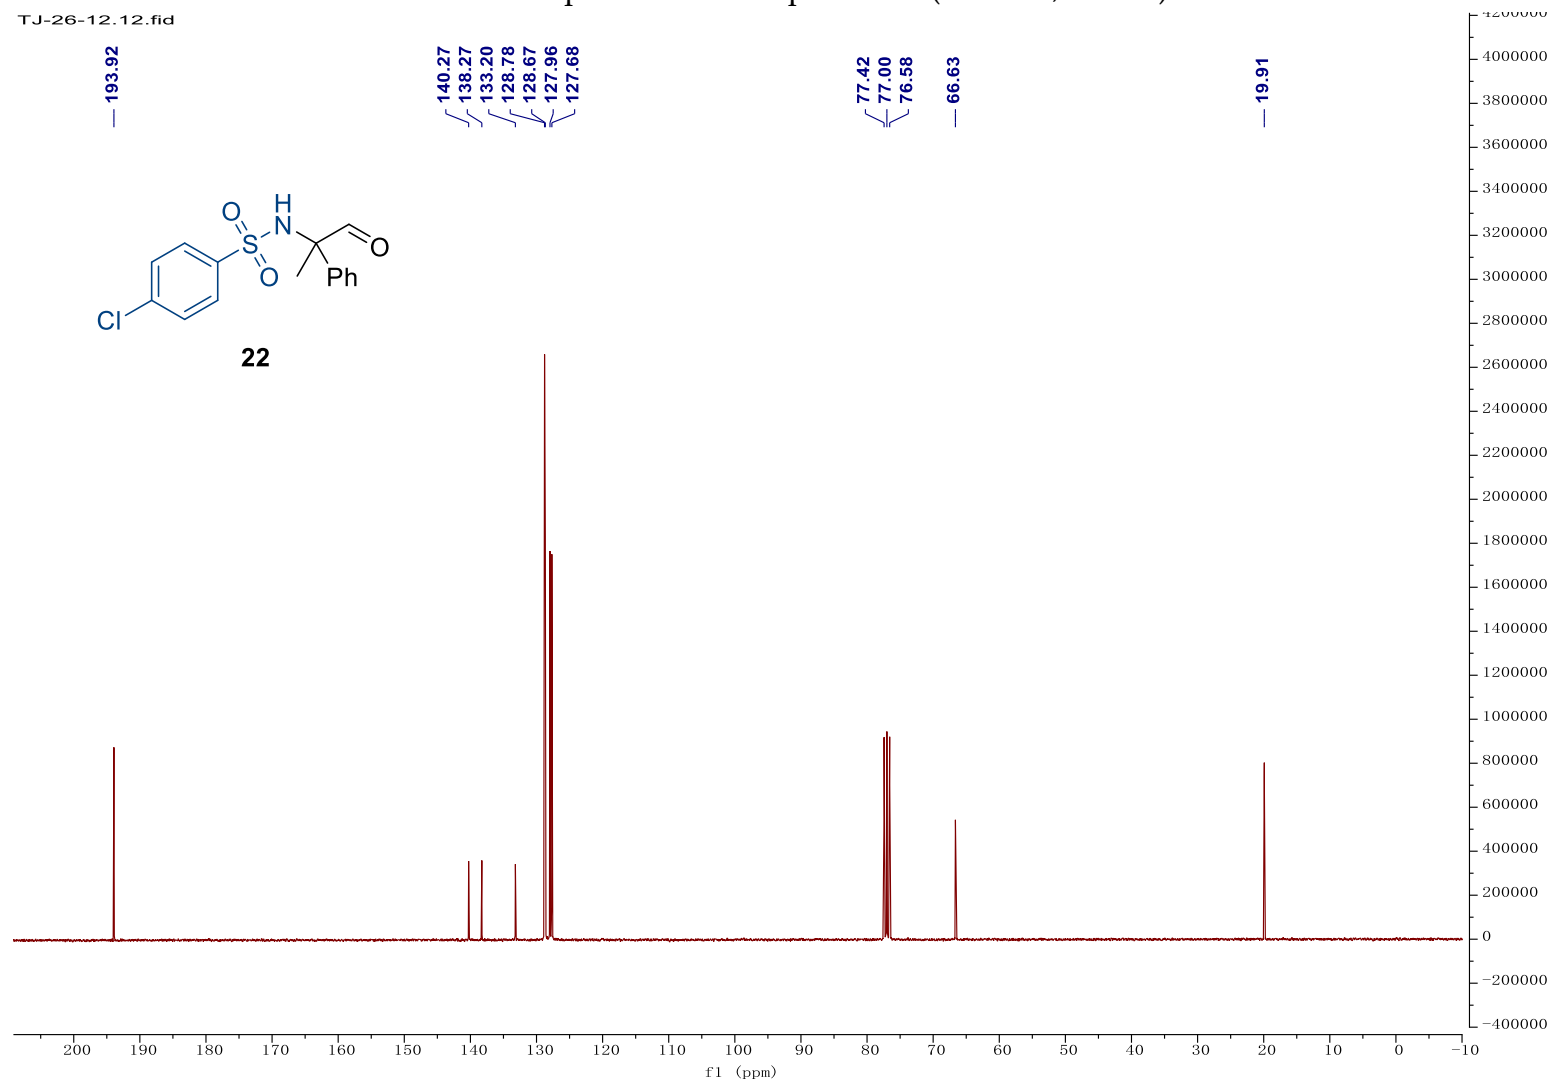

<sup>1</sup>H NMR spectrum of compound **23** (300 MHz, CDCl<sub>3</sub>)

TJ-24-59.1.fid

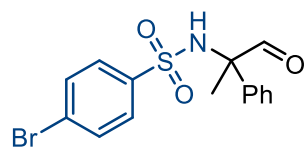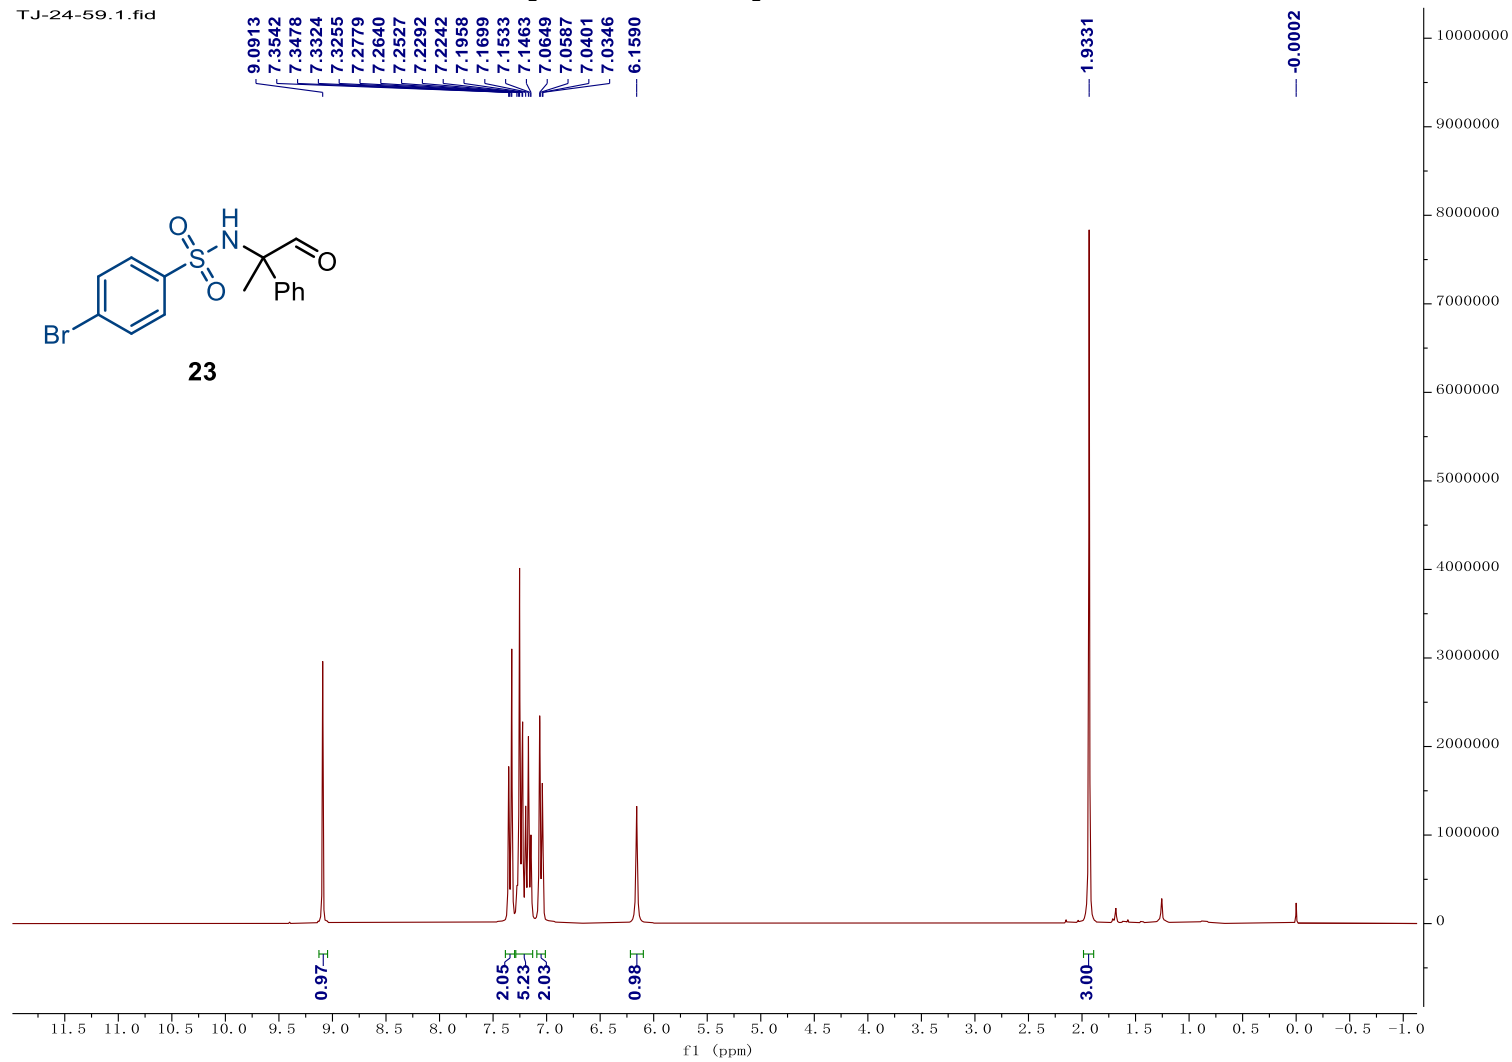

<sup>13</sup>C NMR spectrum of compound 23 (75 MHz, CDCl<sub>3</sub>)

TJ-24-59.8.f14

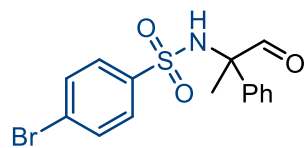

23

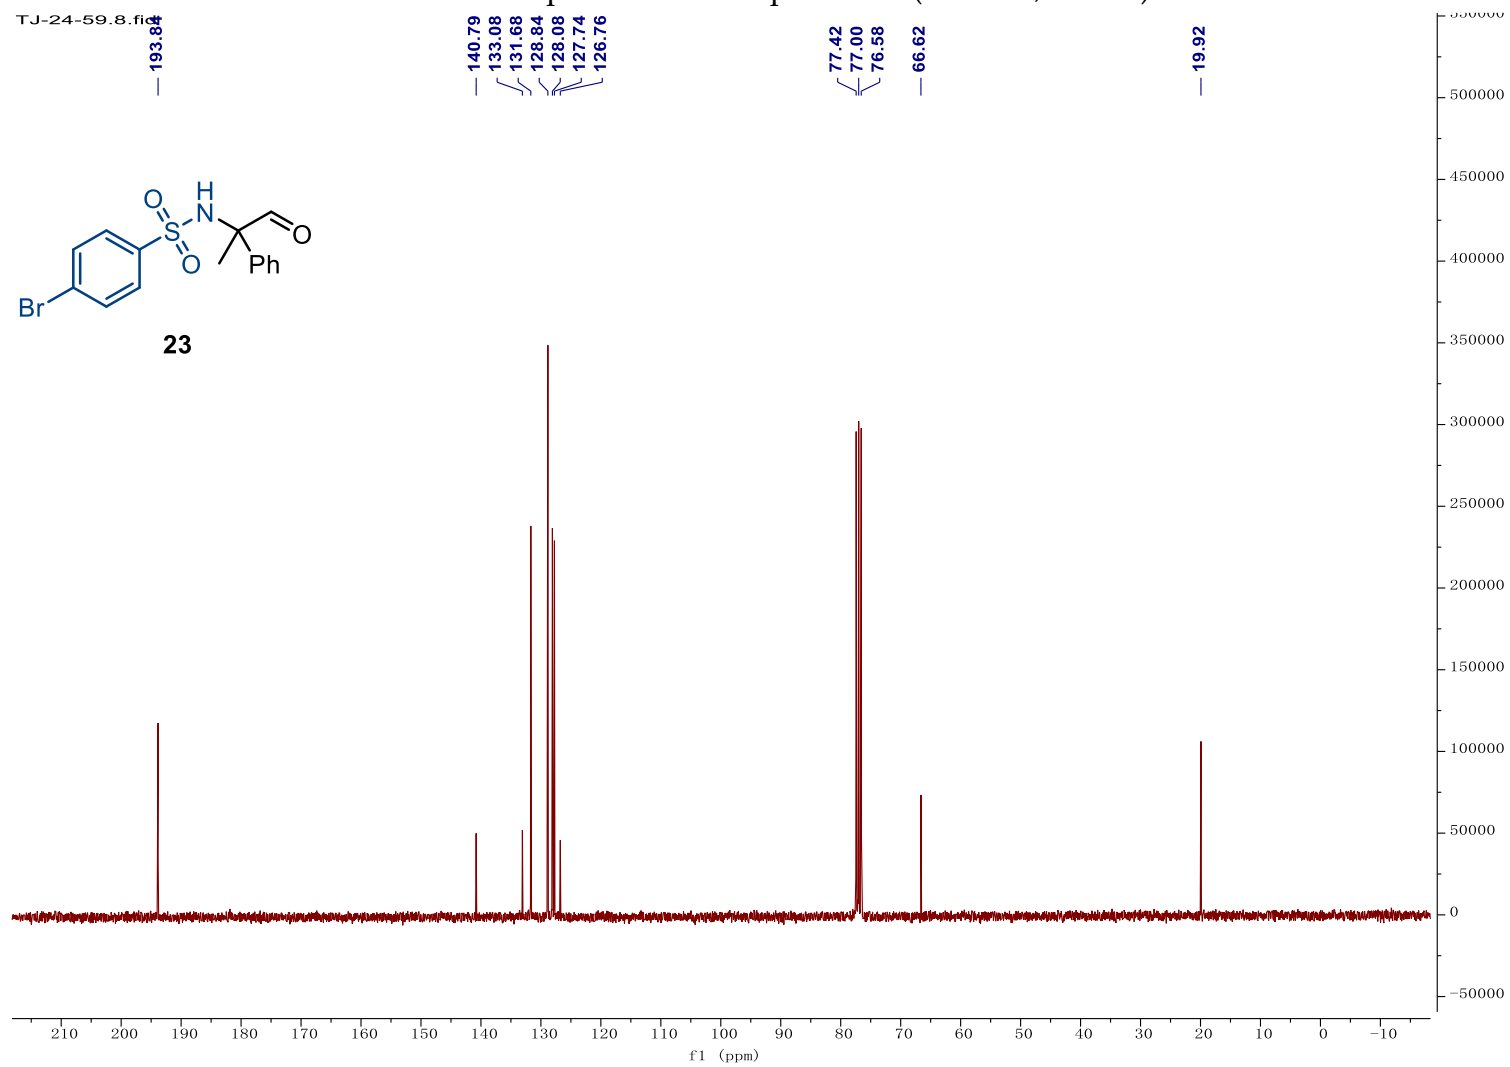

<sup>1</sup>H NMR spectrum of compound **24** (300 MHz, CDCl<sub>3</sub>)

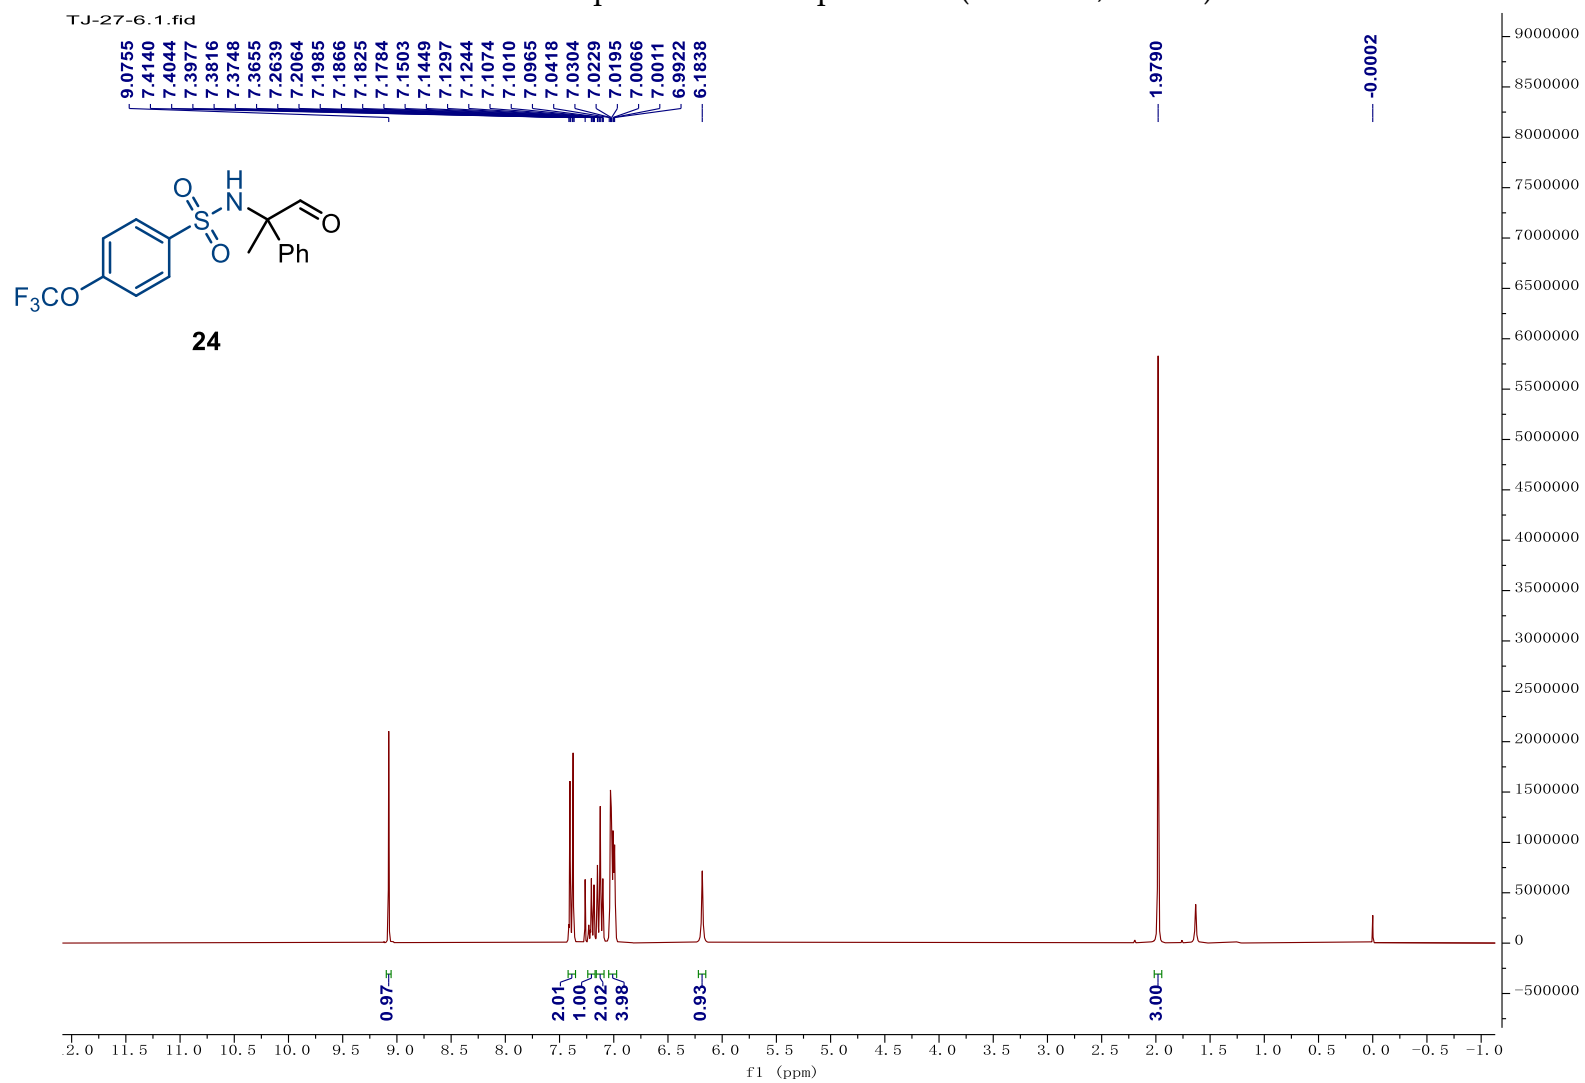

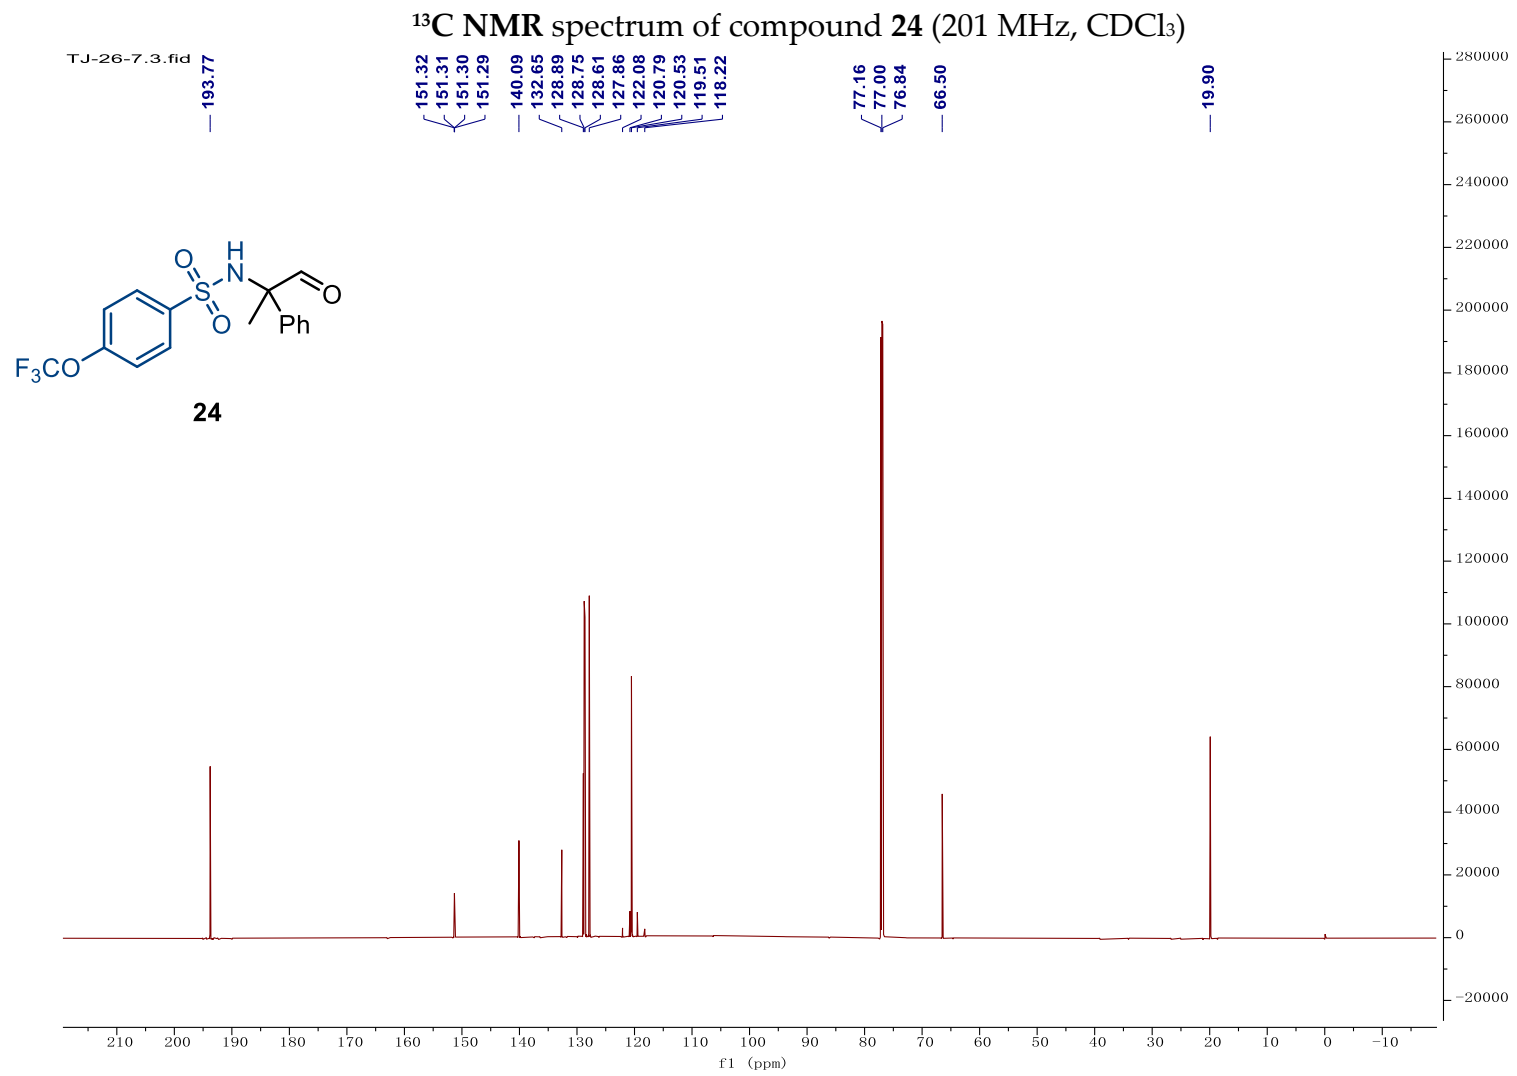

<sup>19</sup>F NMR spectrum of compound **24** (282 MHz, CDCl<sub>3</sub>)

TJ-27-6.2.fid

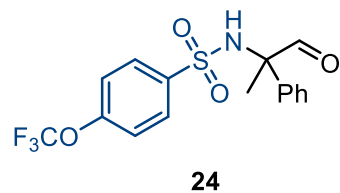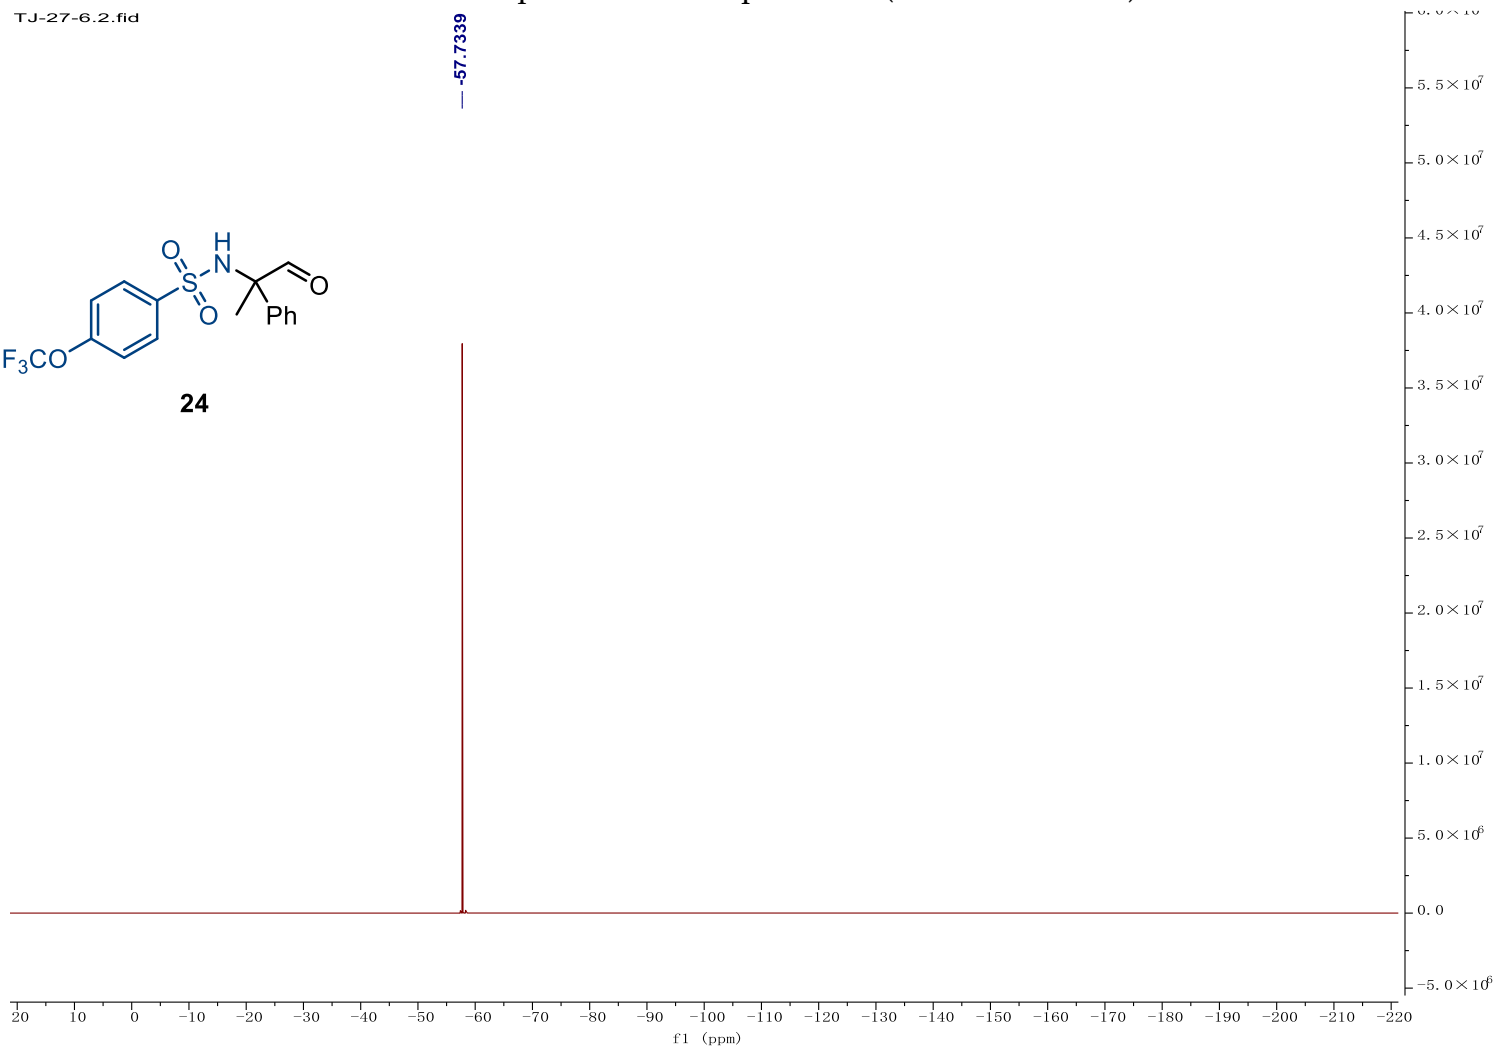

<sup>1</sup>H NMR spectrum of compound **25** (300 MHz, CDCl<sub>3</sub>)

TJ-27-15.1.fid

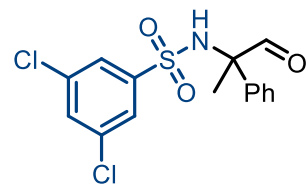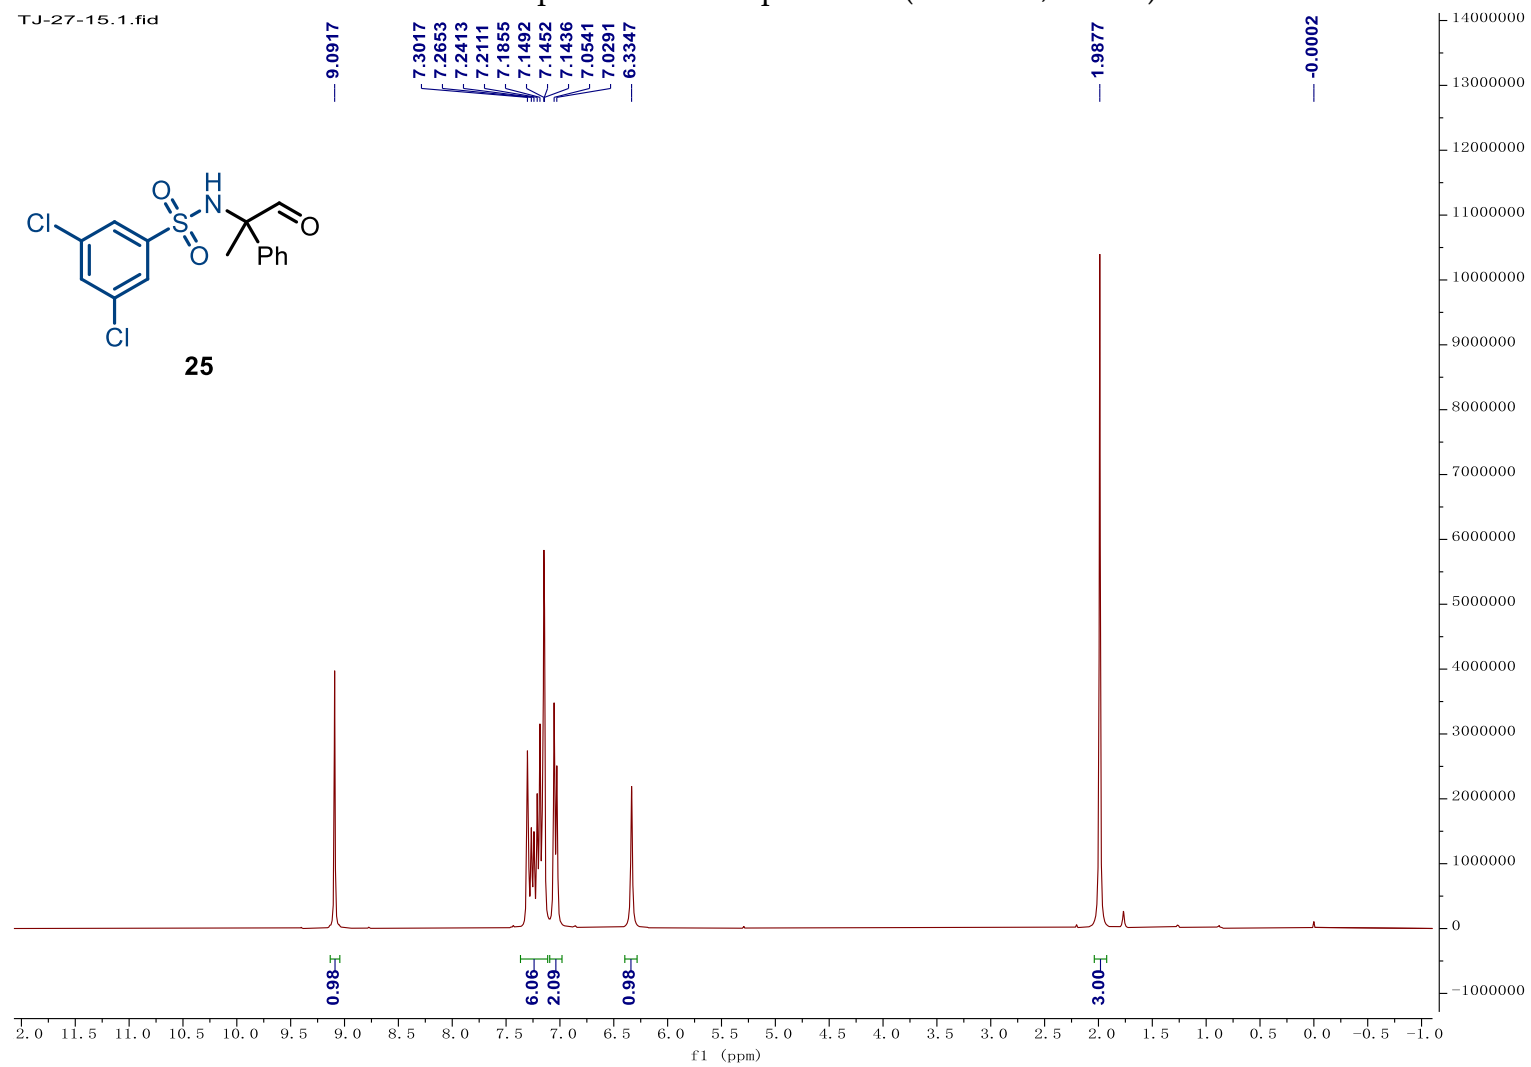

<sup>13</sup>C NMR spectrum of compound 25 (75 MHz, CDCl<sub>3</sub>)

TJ-27-15.2.f14

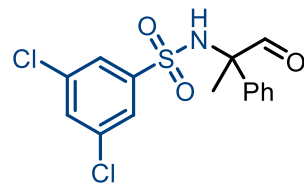

25

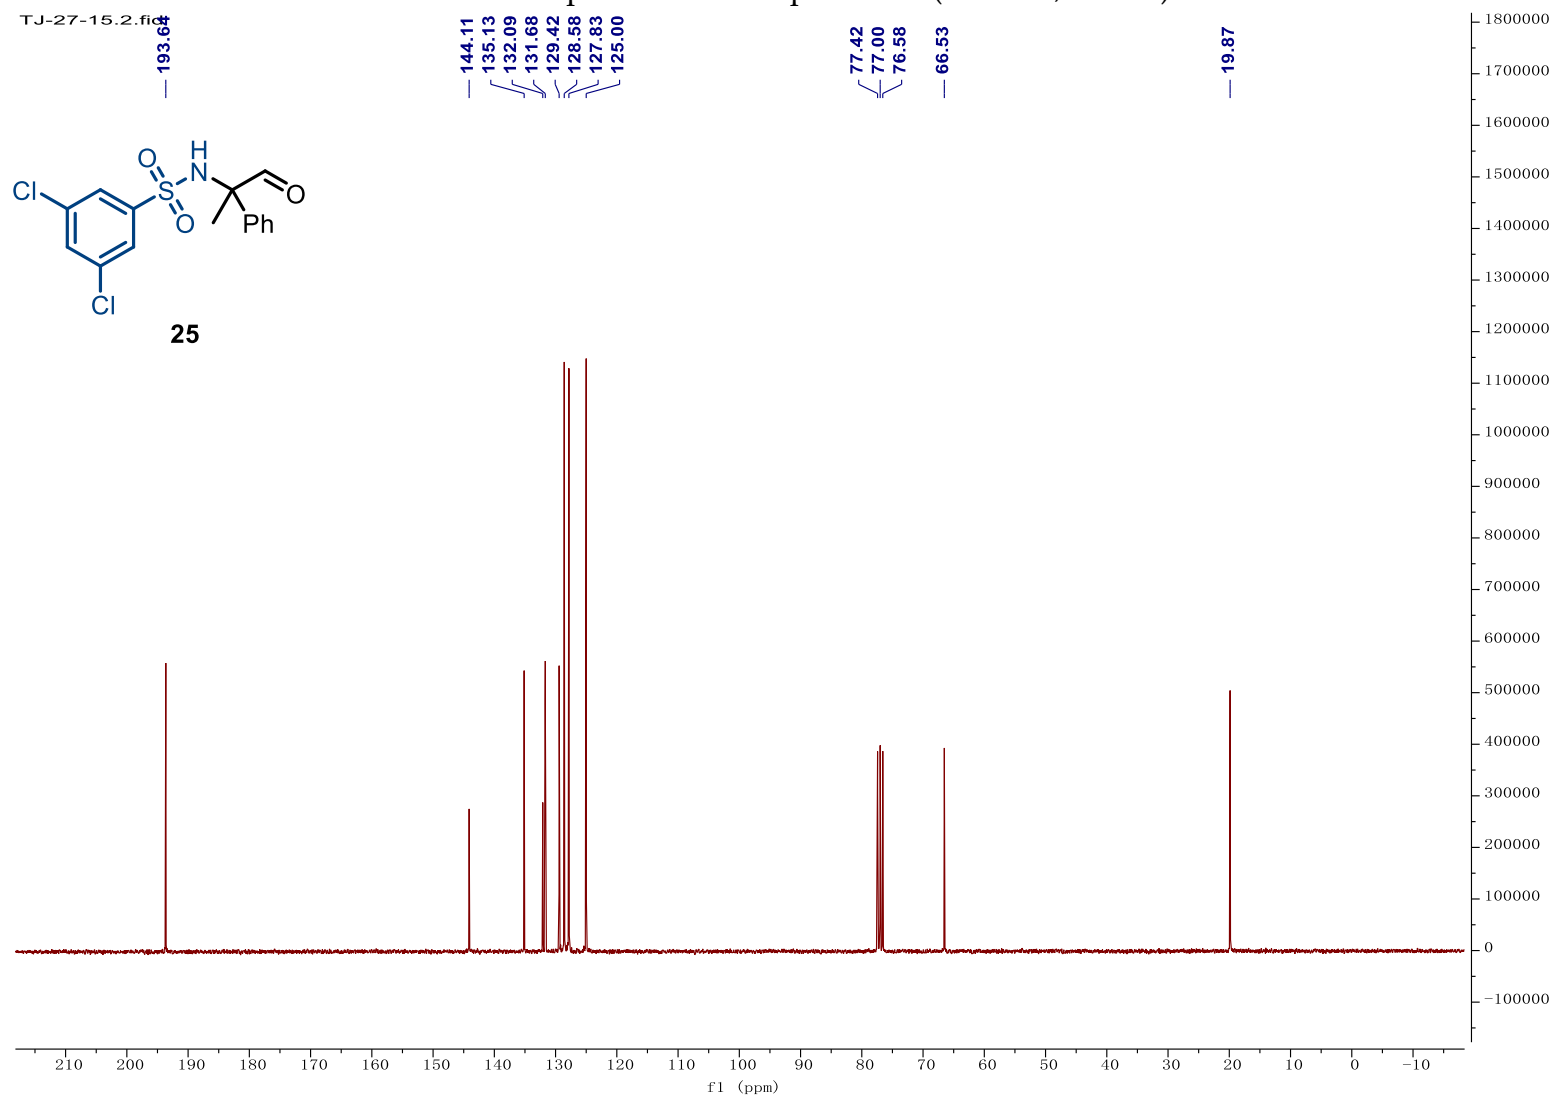

<sup>1</sup>H NMR spectrum of compound **26** (300 MHz, CDCl<sub>3</sub>)

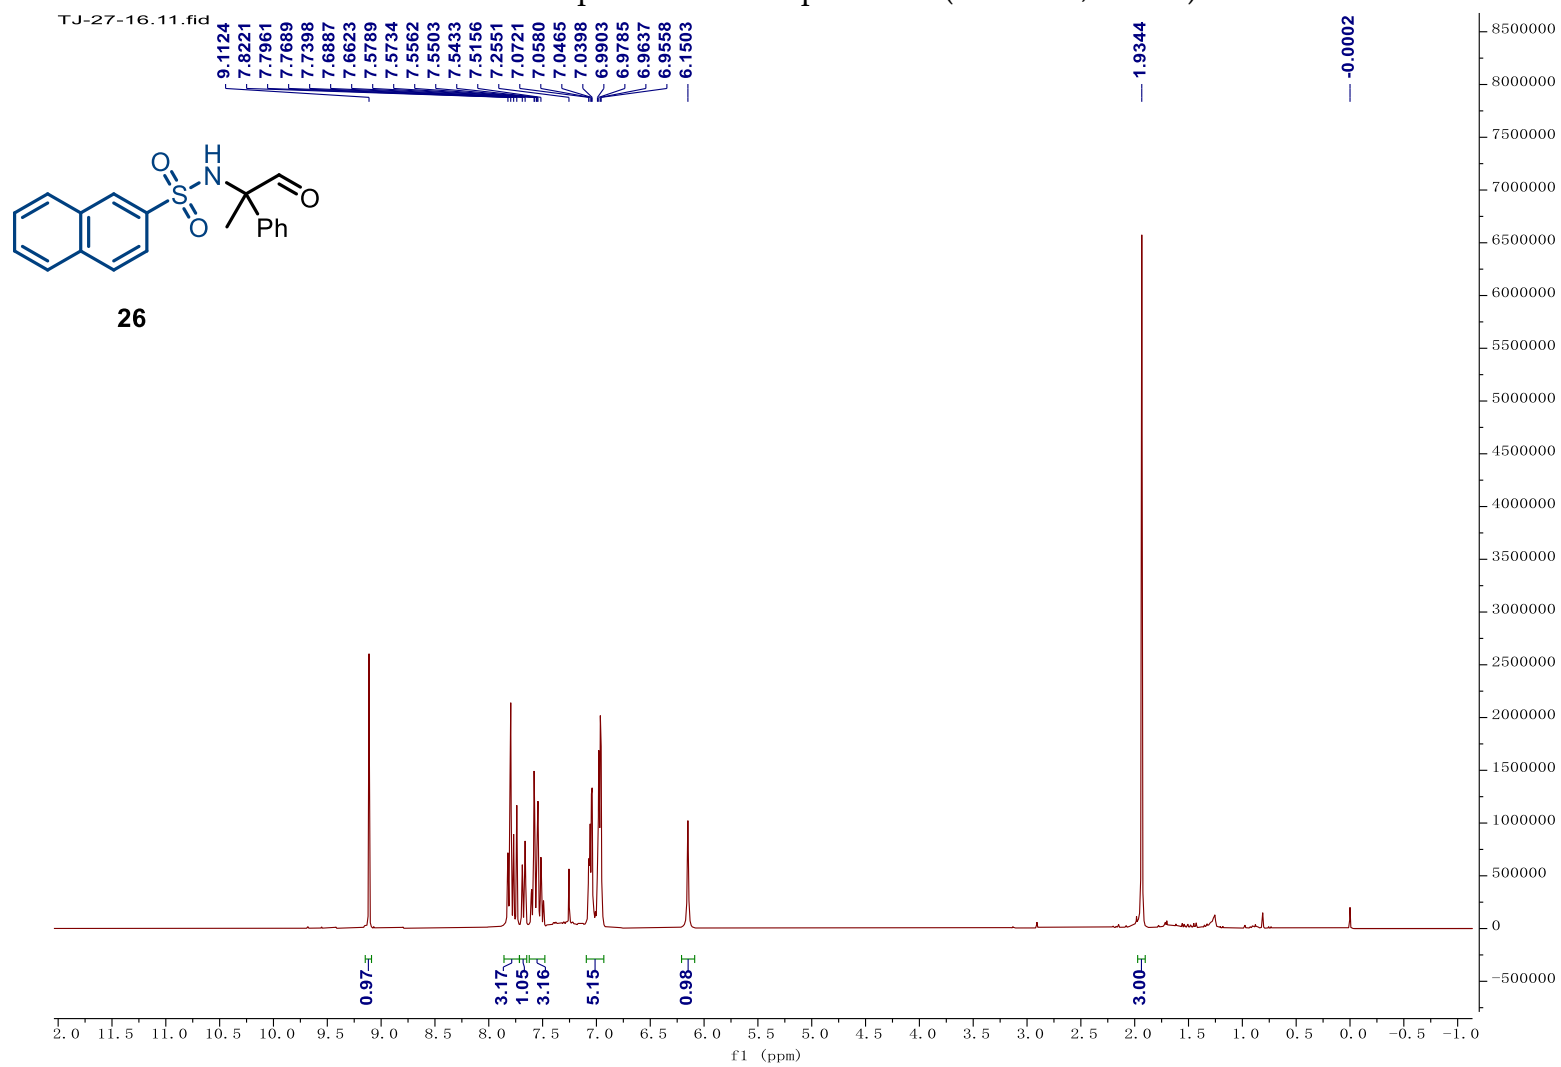

<sup>13</sup>C NMR spectrum of compound 26 (75 MHz, CDCl<sub>3</sub>)

TJ-27-16.14.fid

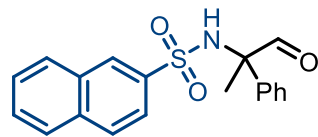

26

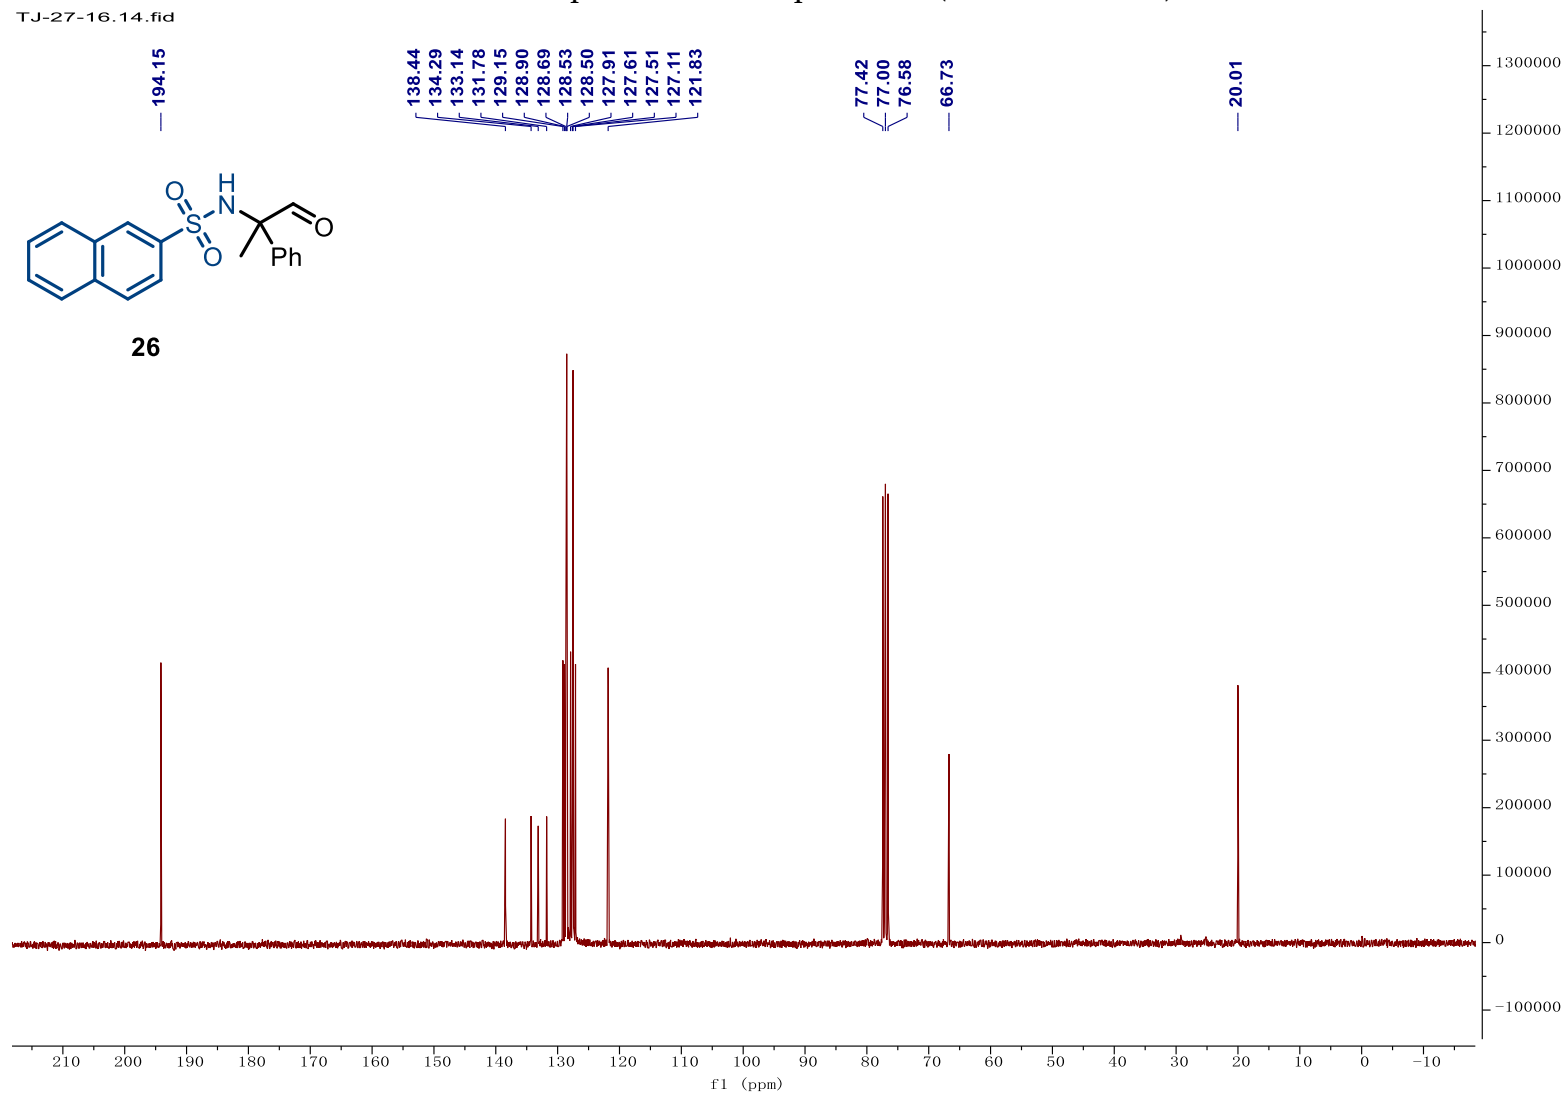

<sup>1</sup>H NMR spectrum of compound 27 (300 MHz, CDCl<sub>3</sub>)

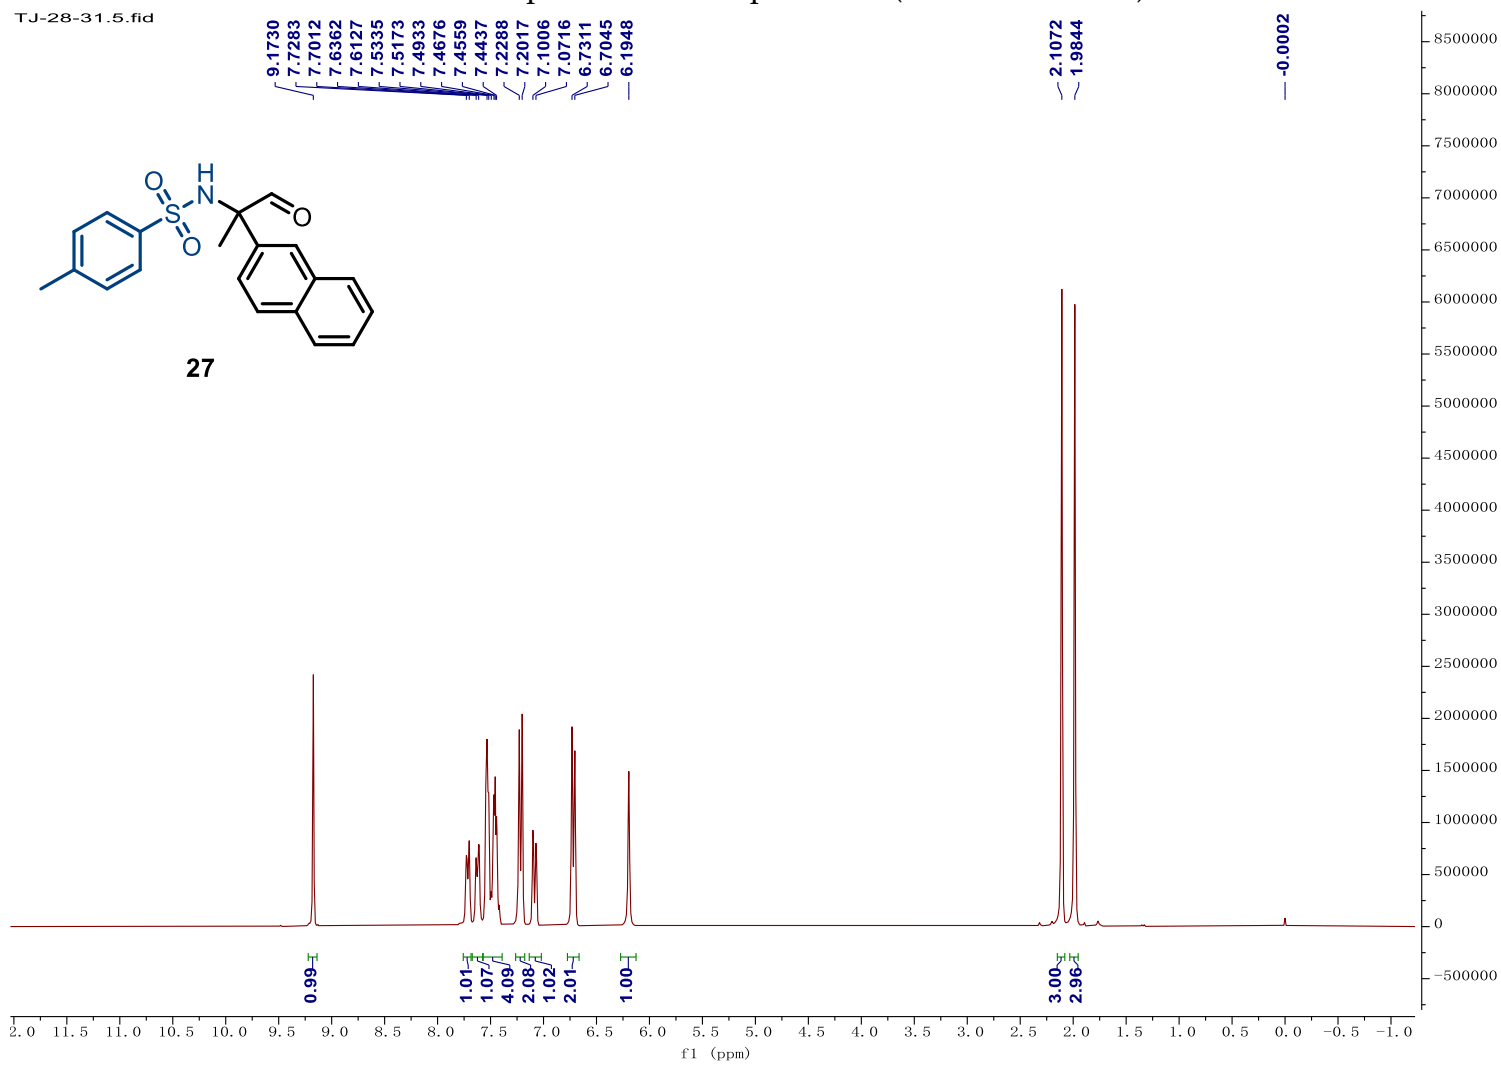

<sup>13</sup>C NMR spectrum of compound 27 (75 MHz, CDCl<sub>3</sub>)

TJ-28-31.6.f1

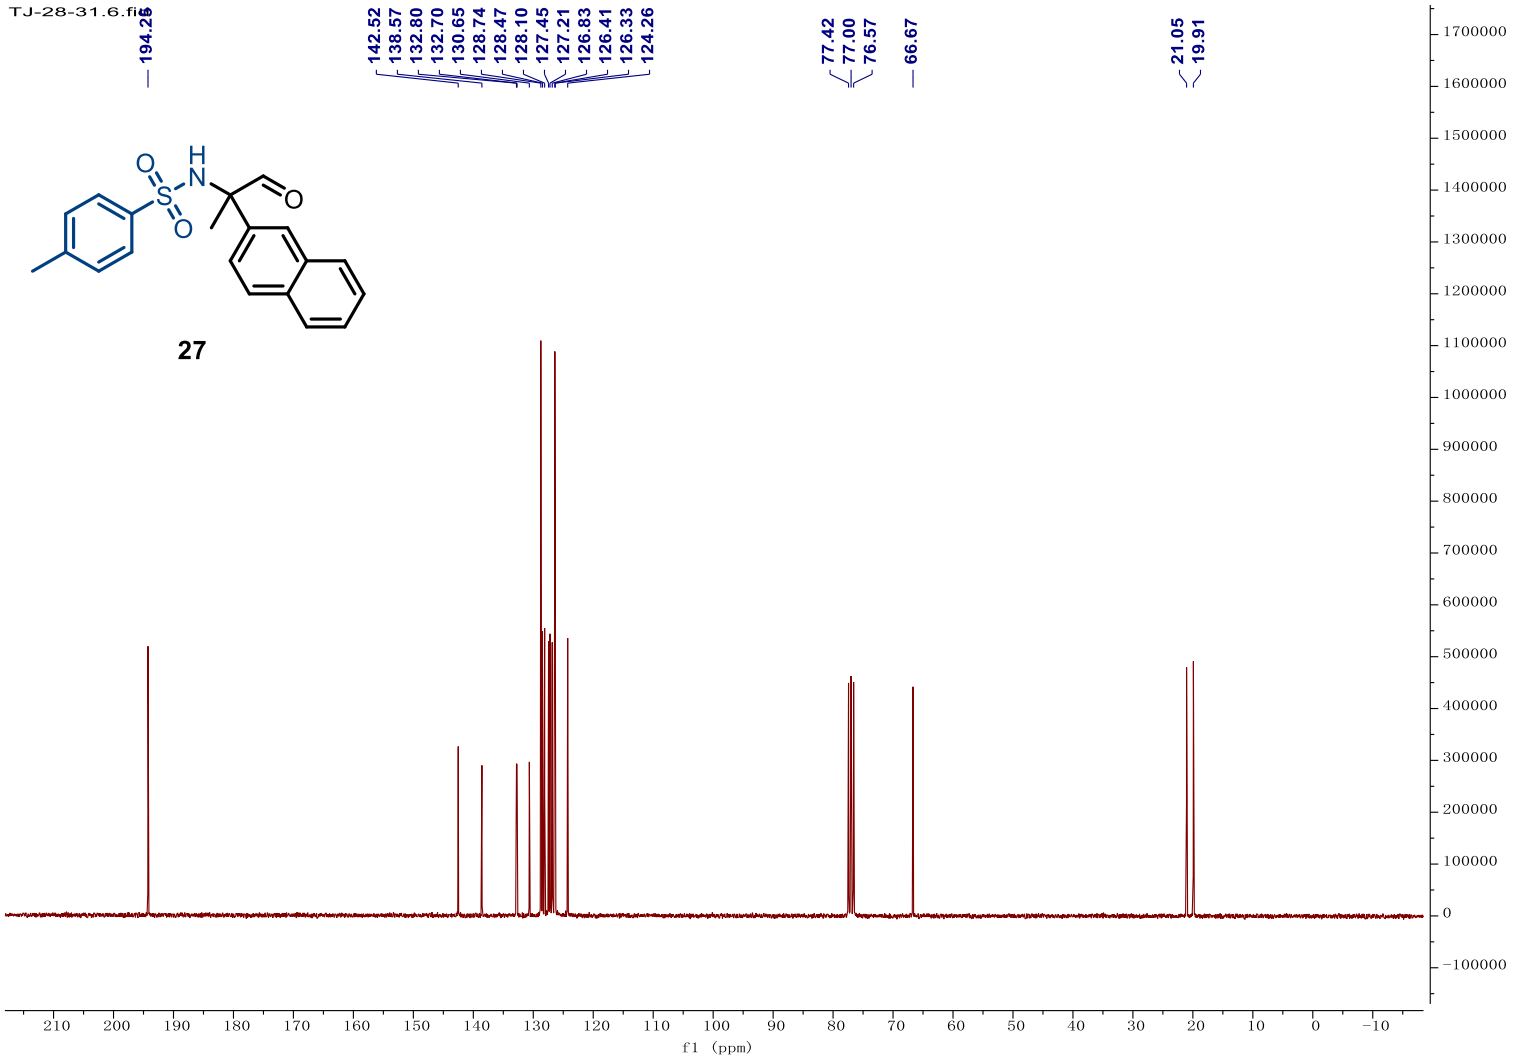

<sup>1</sup>H NMR spectrum of compound 28 (300 MHz, CDCl<sub>3</sub>)

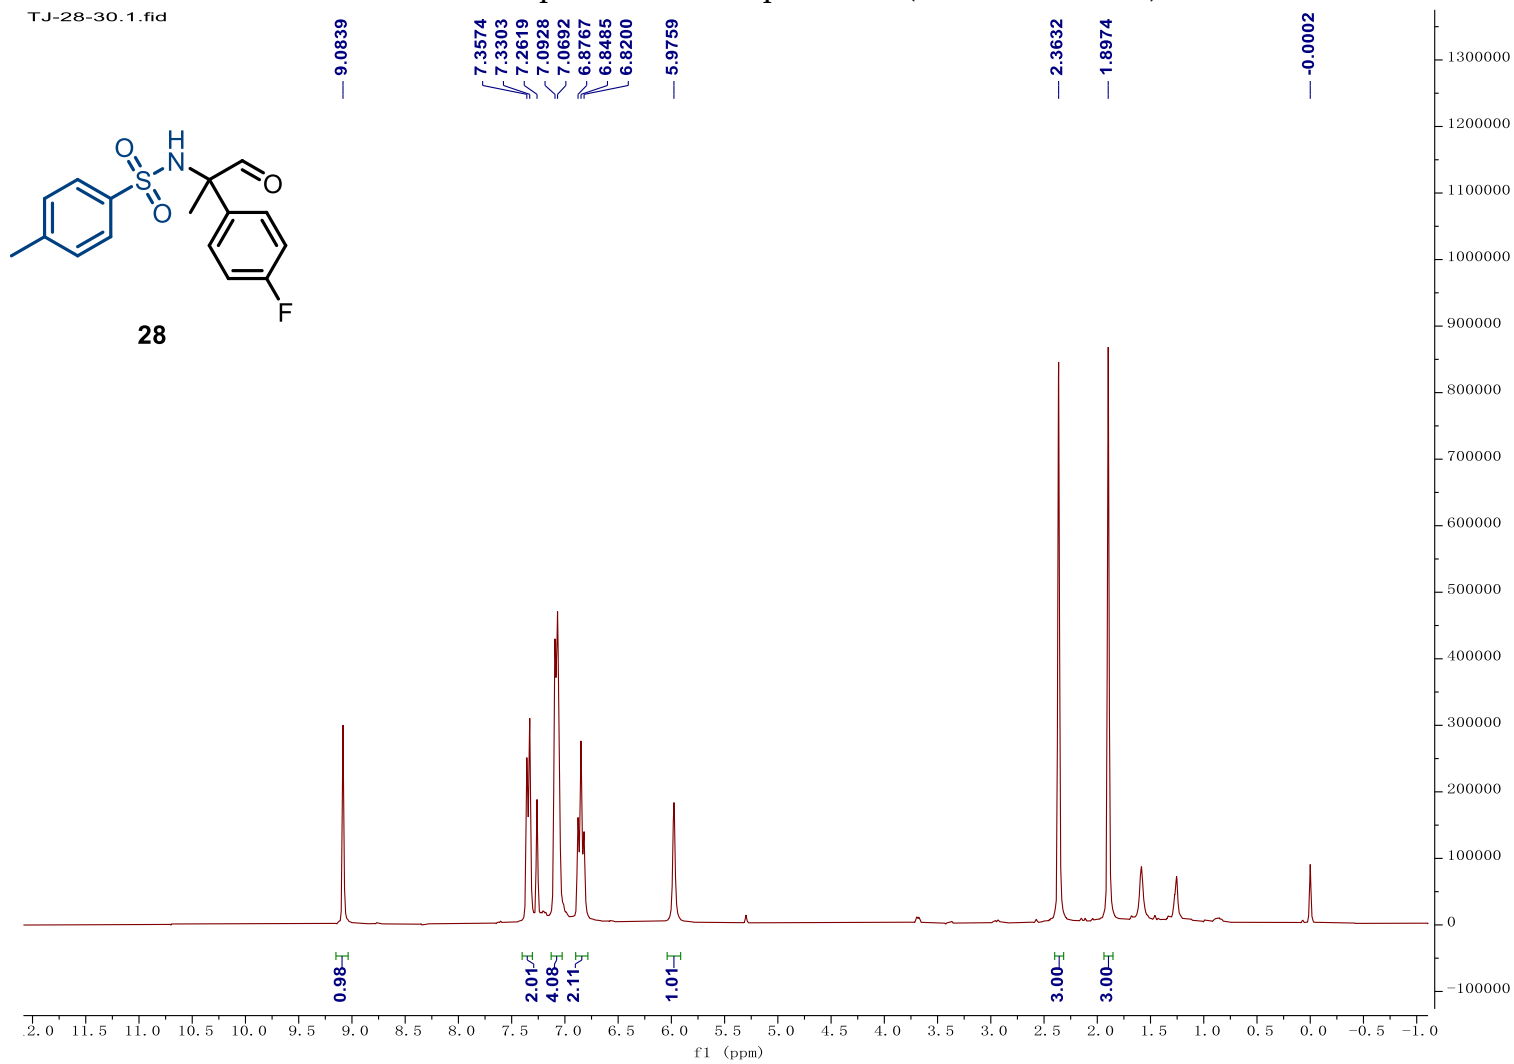

<sup>13</sup>C NMR spectrum of compound 28 (75 MHz, CDCl<sub>3</sub>)

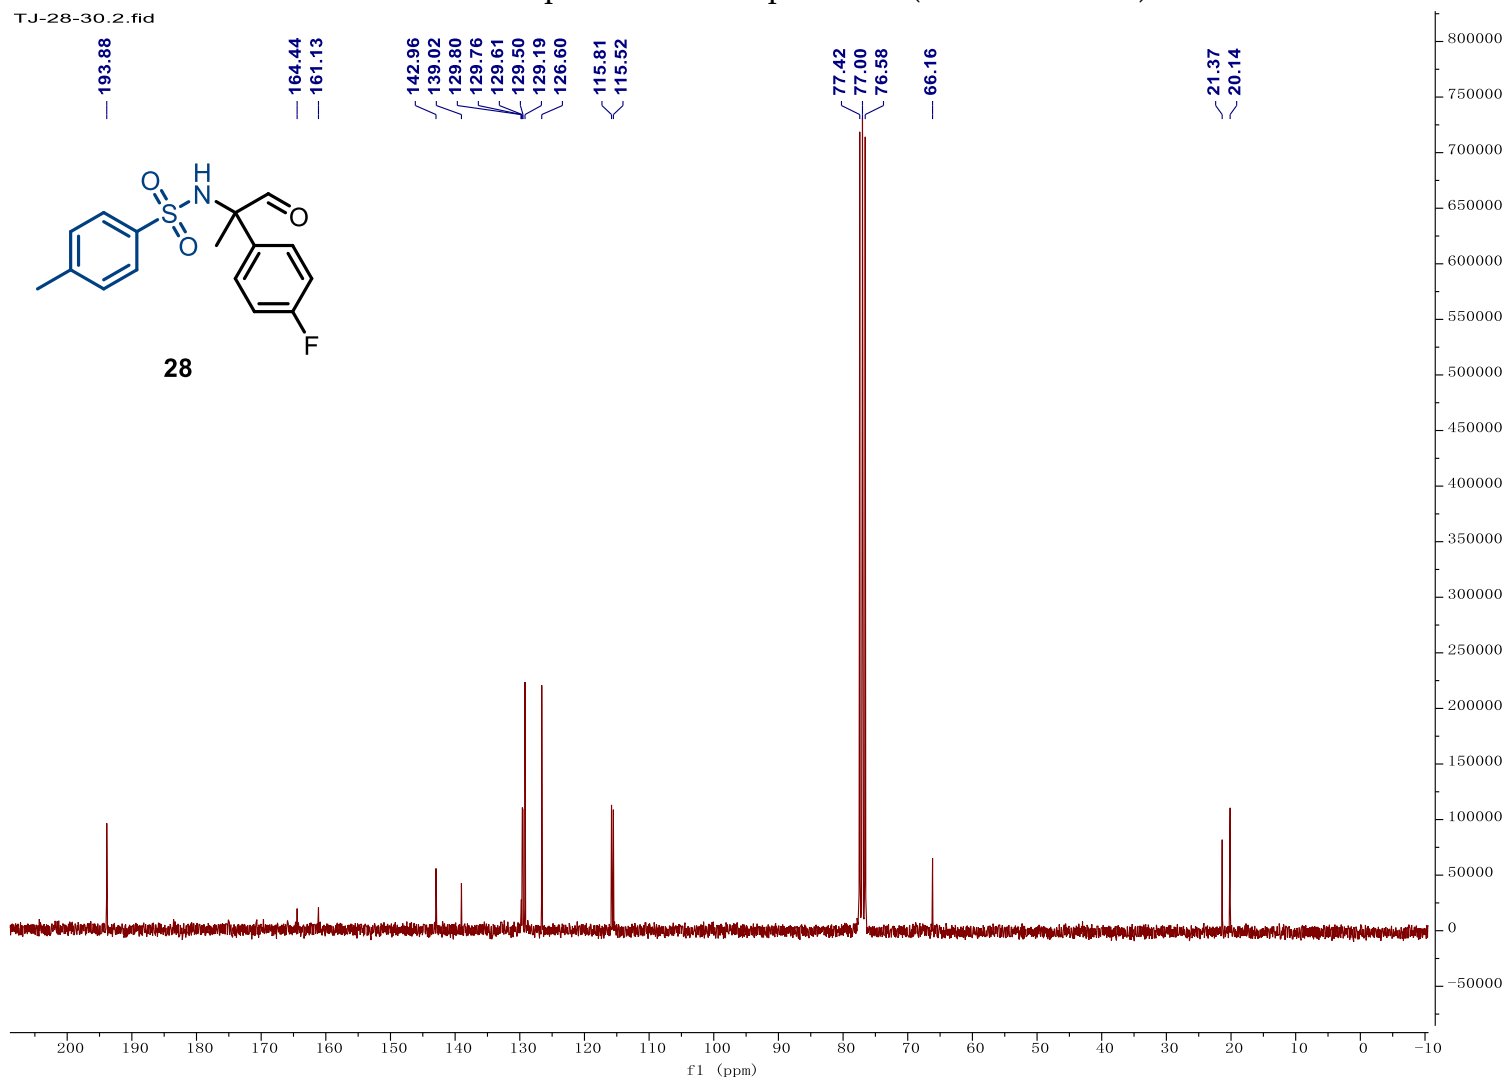

<sup>19</sup>F NMR spectrum of compound **28** (376 MHz, CDCl<sub>3</sub>)

y-28-30.1.fid  
F19CPD

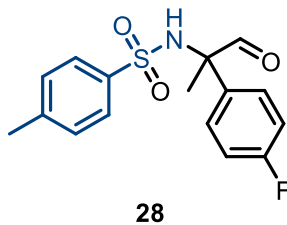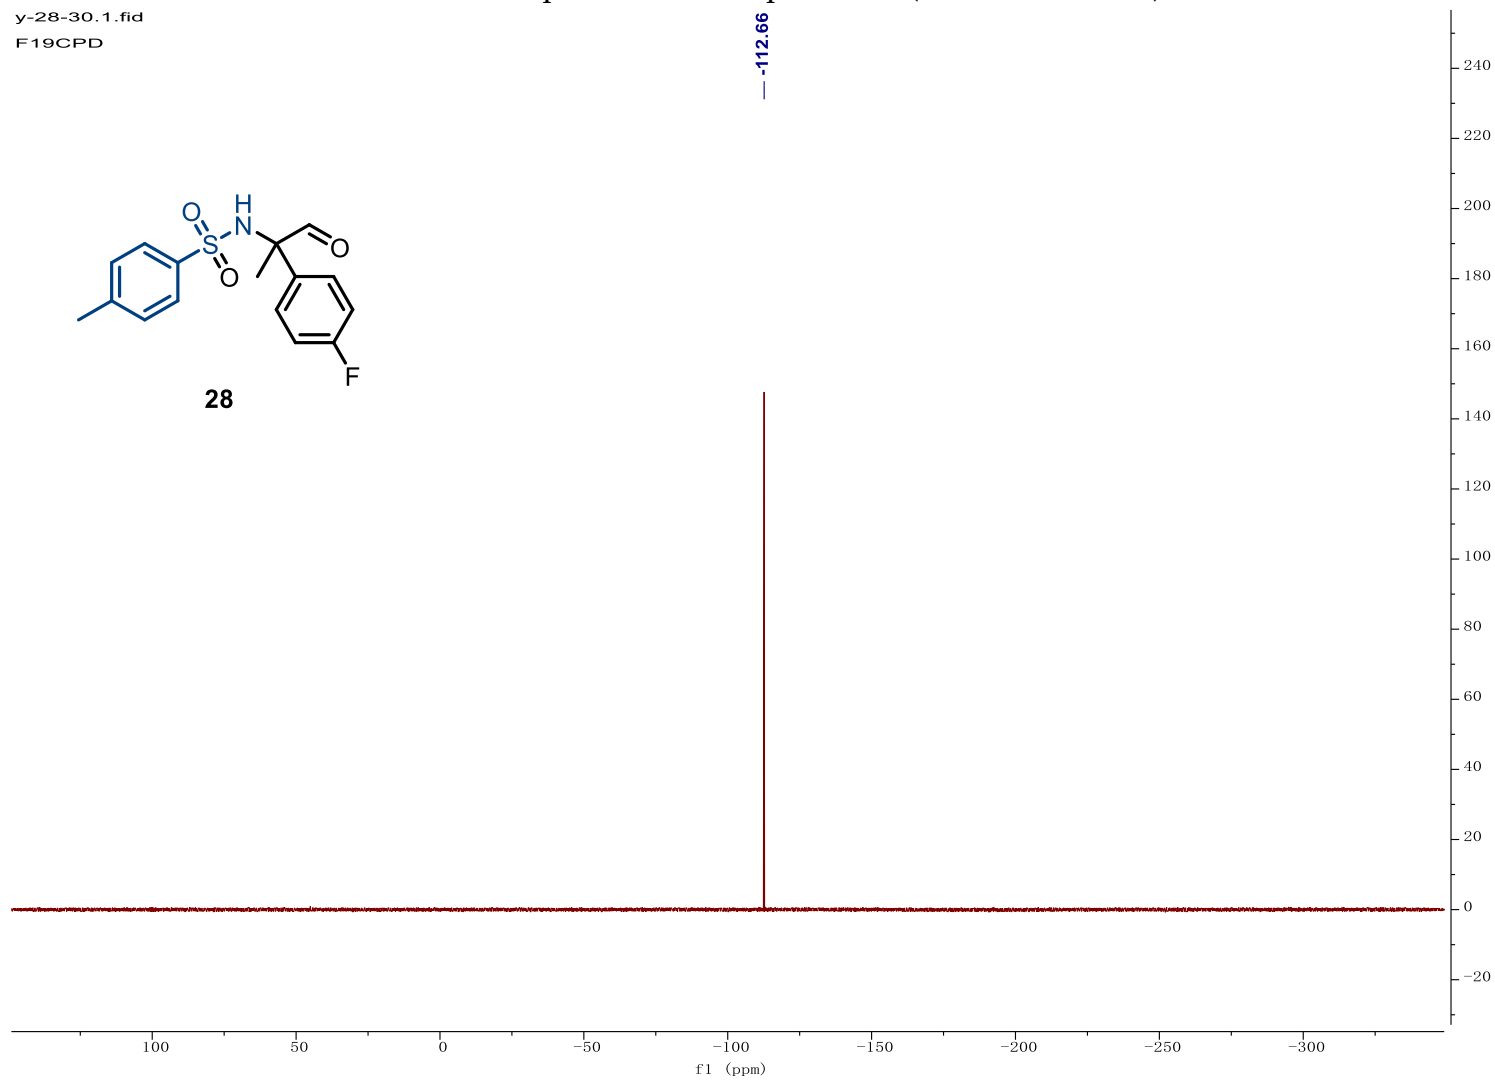

<sup>1</sup>H NMR spectrum of compound **29** (300 MHz, CDCl<sub>3</sub>)

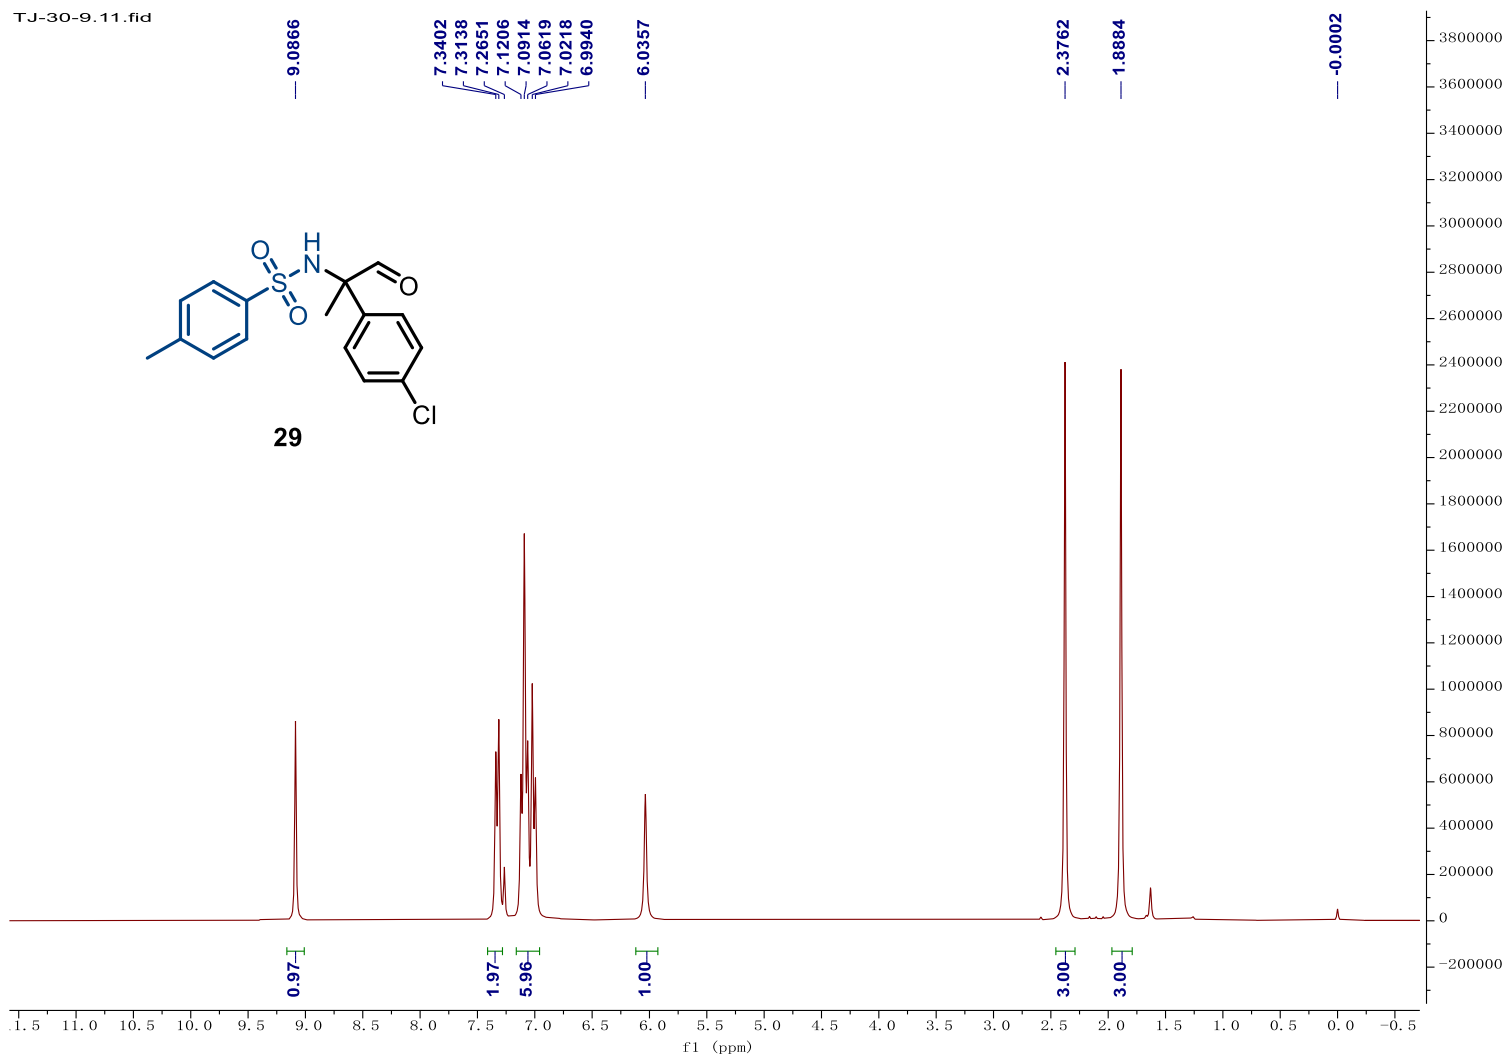

<sup>13</sup>C NMR spectrum of compound 29 (75 MHz, CDCl<sub>3</sub>)

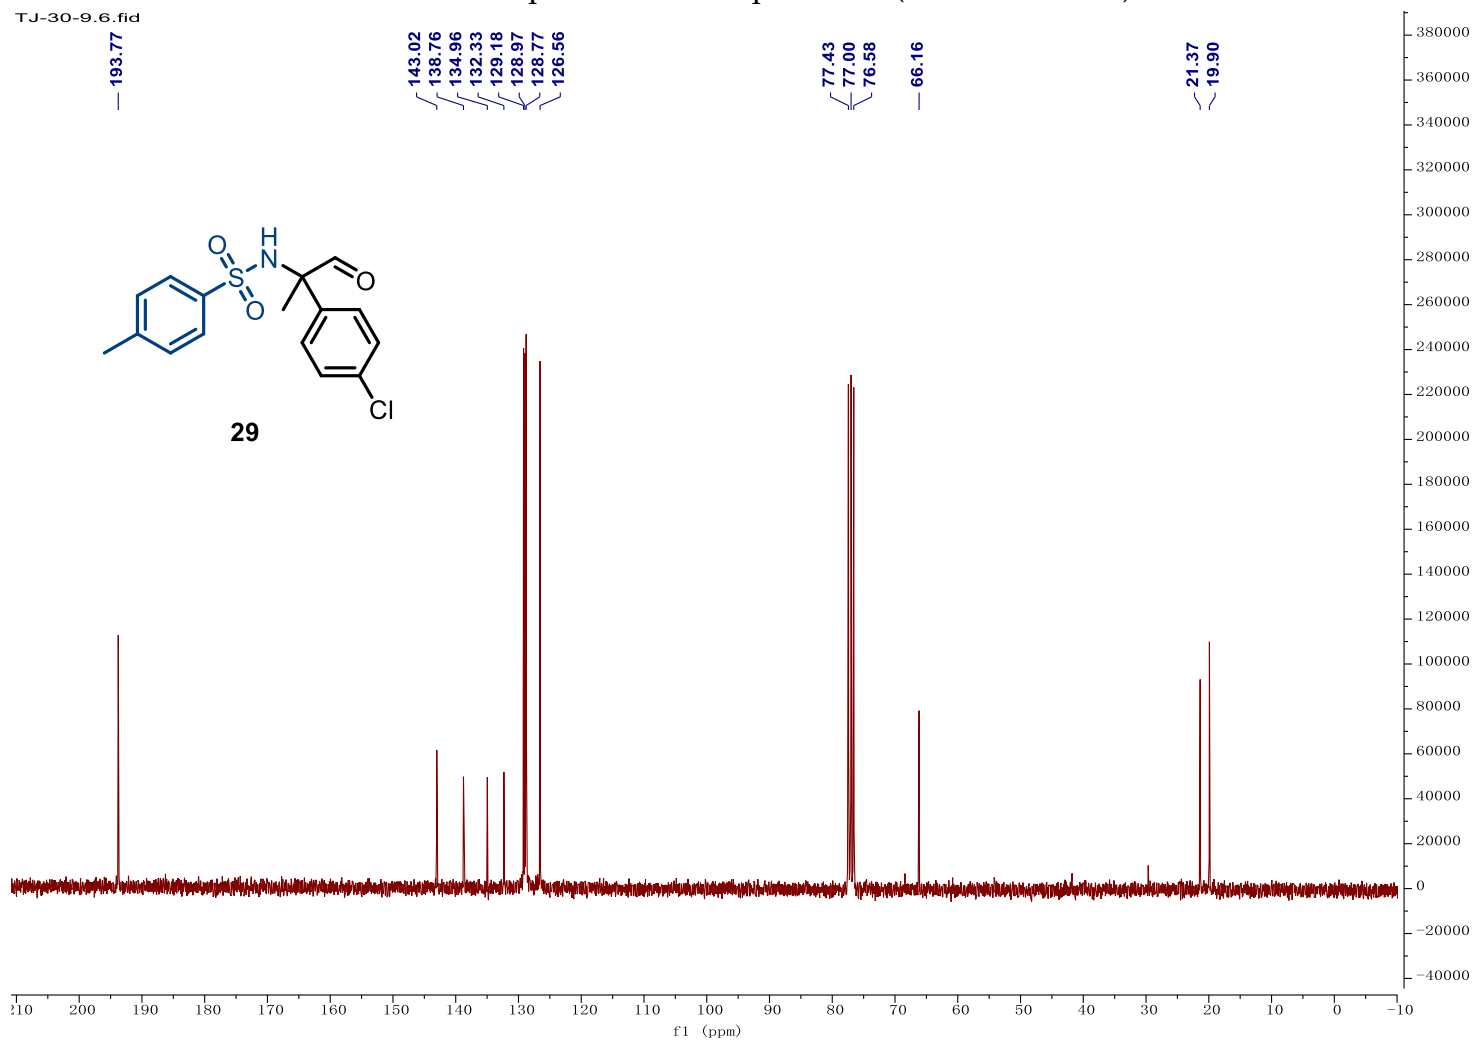

<sup>1</sup>H NMR spectrum of compound 30 (300 MHz, CDCl<sub>3</sub>)

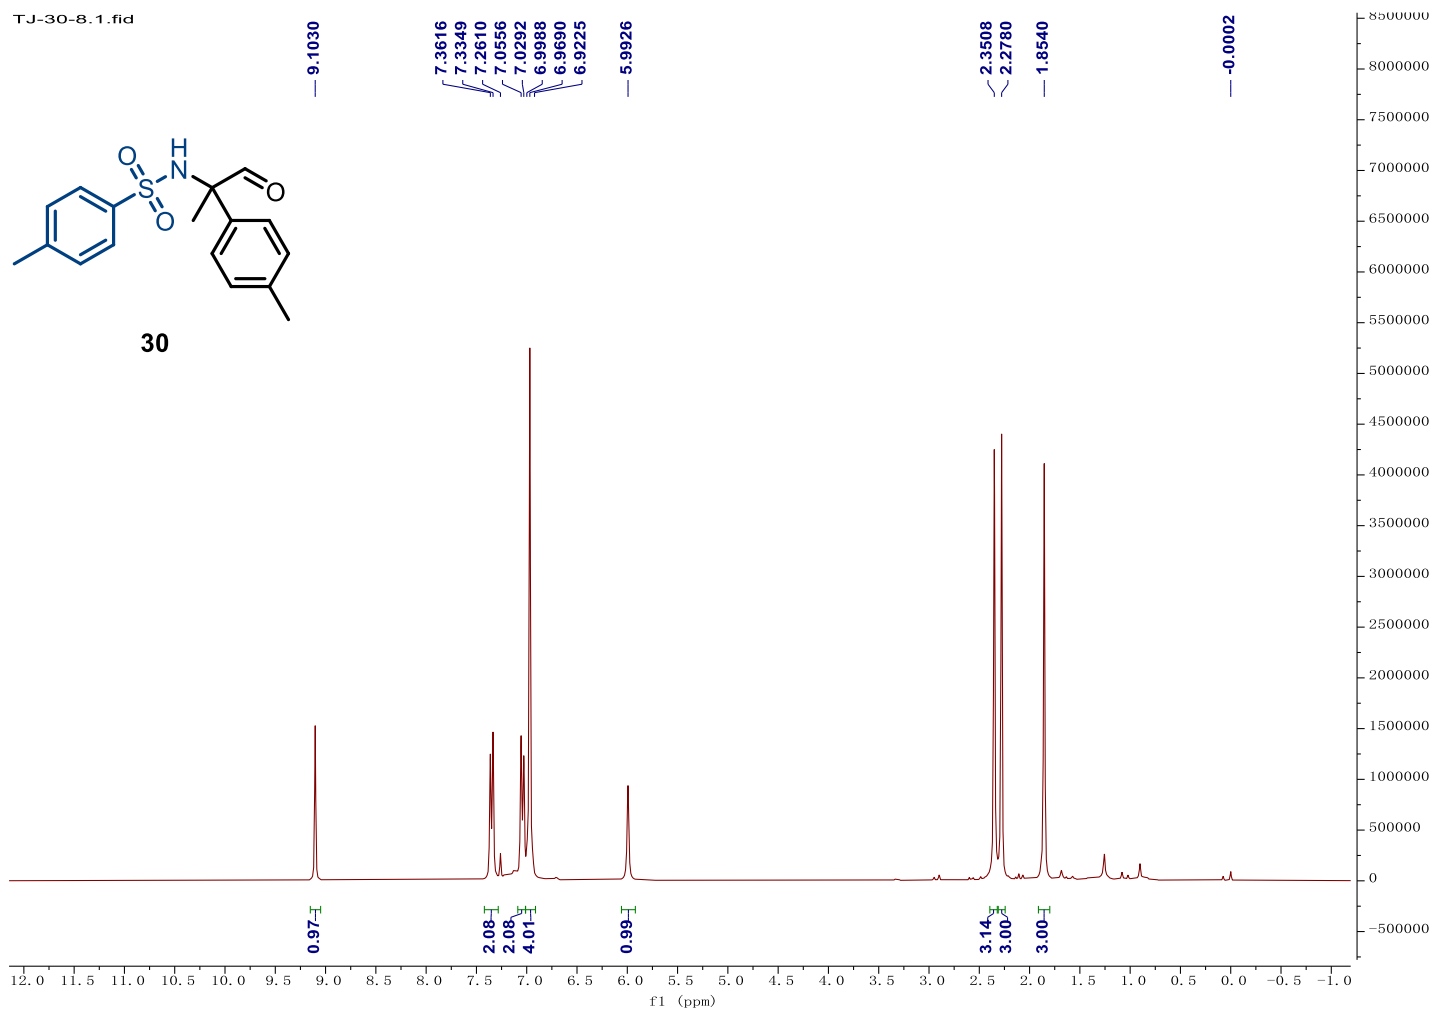

<sup>13</sup>C NMR spectrum of compound 30 (75 MHz, CDCl<sub>3</sub>)

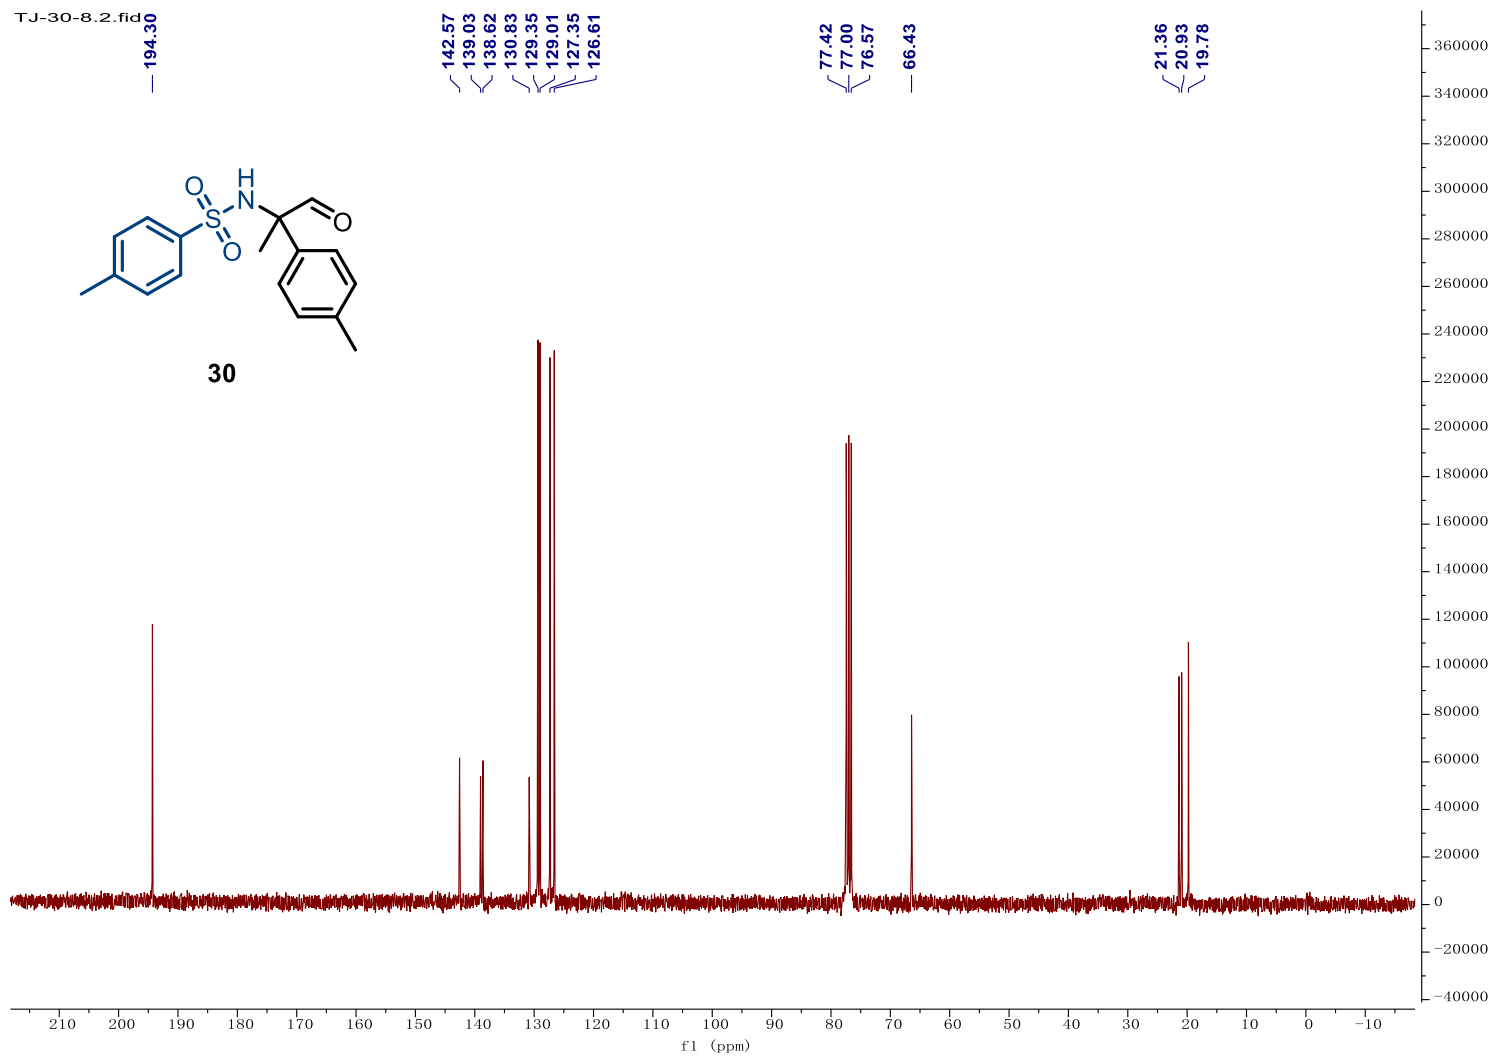

<sup>1</sup>H NMR spectrum of compound 31 (300 MHz, CDCl<sub>3</sub>)

TJ-28-25.13.fid

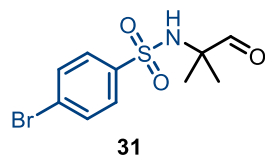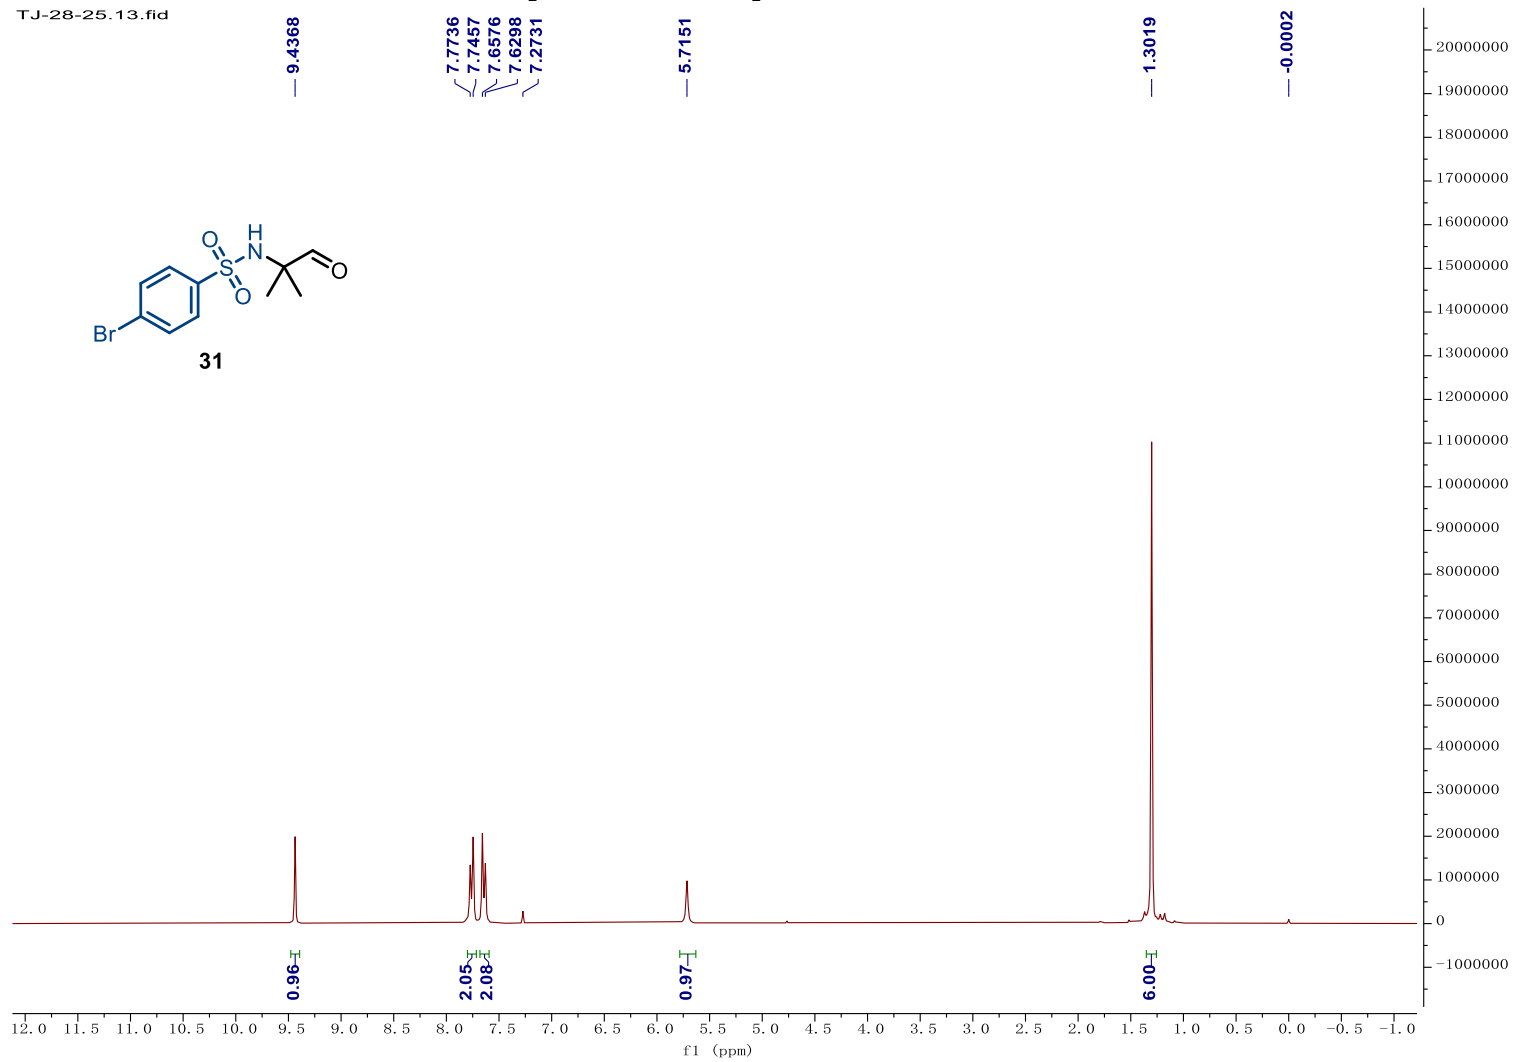

<sup>13</sup>C NMR spectrum of compound 31 (75 MHz, CDCl<sub>3</sub>)

TJ-28-25.14.fid

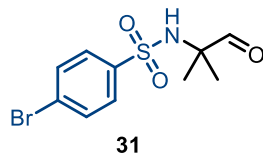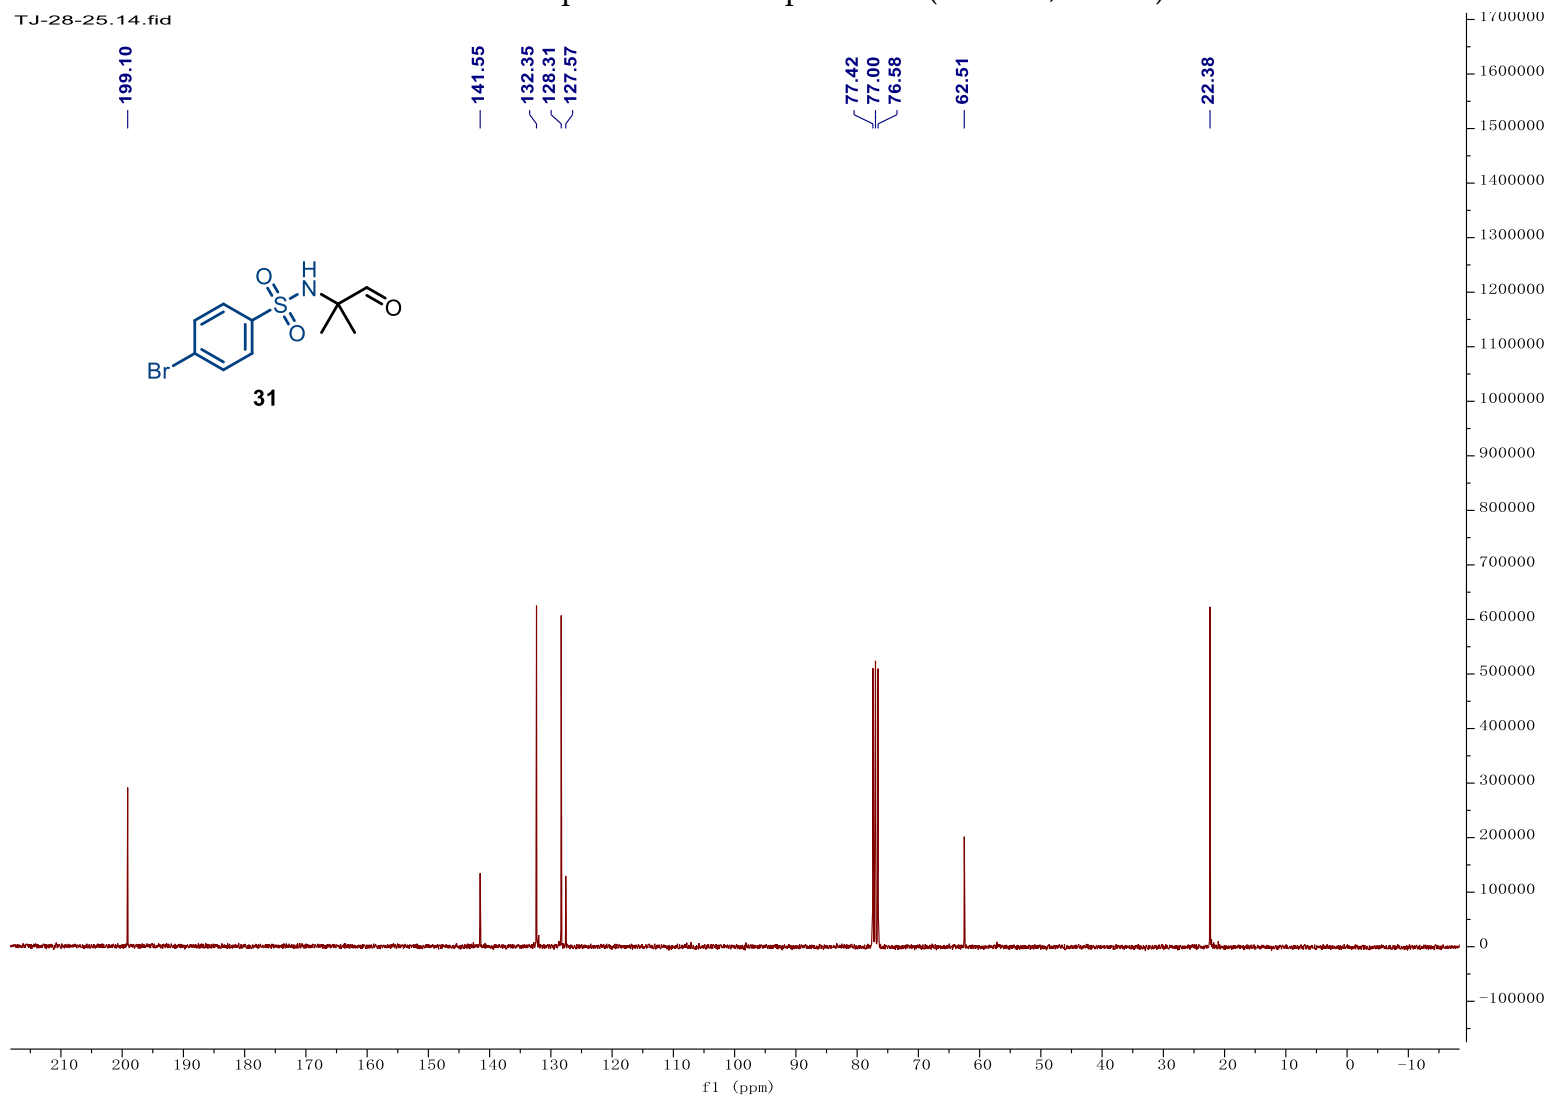

<sup>1</sup>H NMR spectrum of compound 32 (300 MHz, CDCl<sub>3</sub>)

TJ-28-22.1.fid

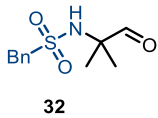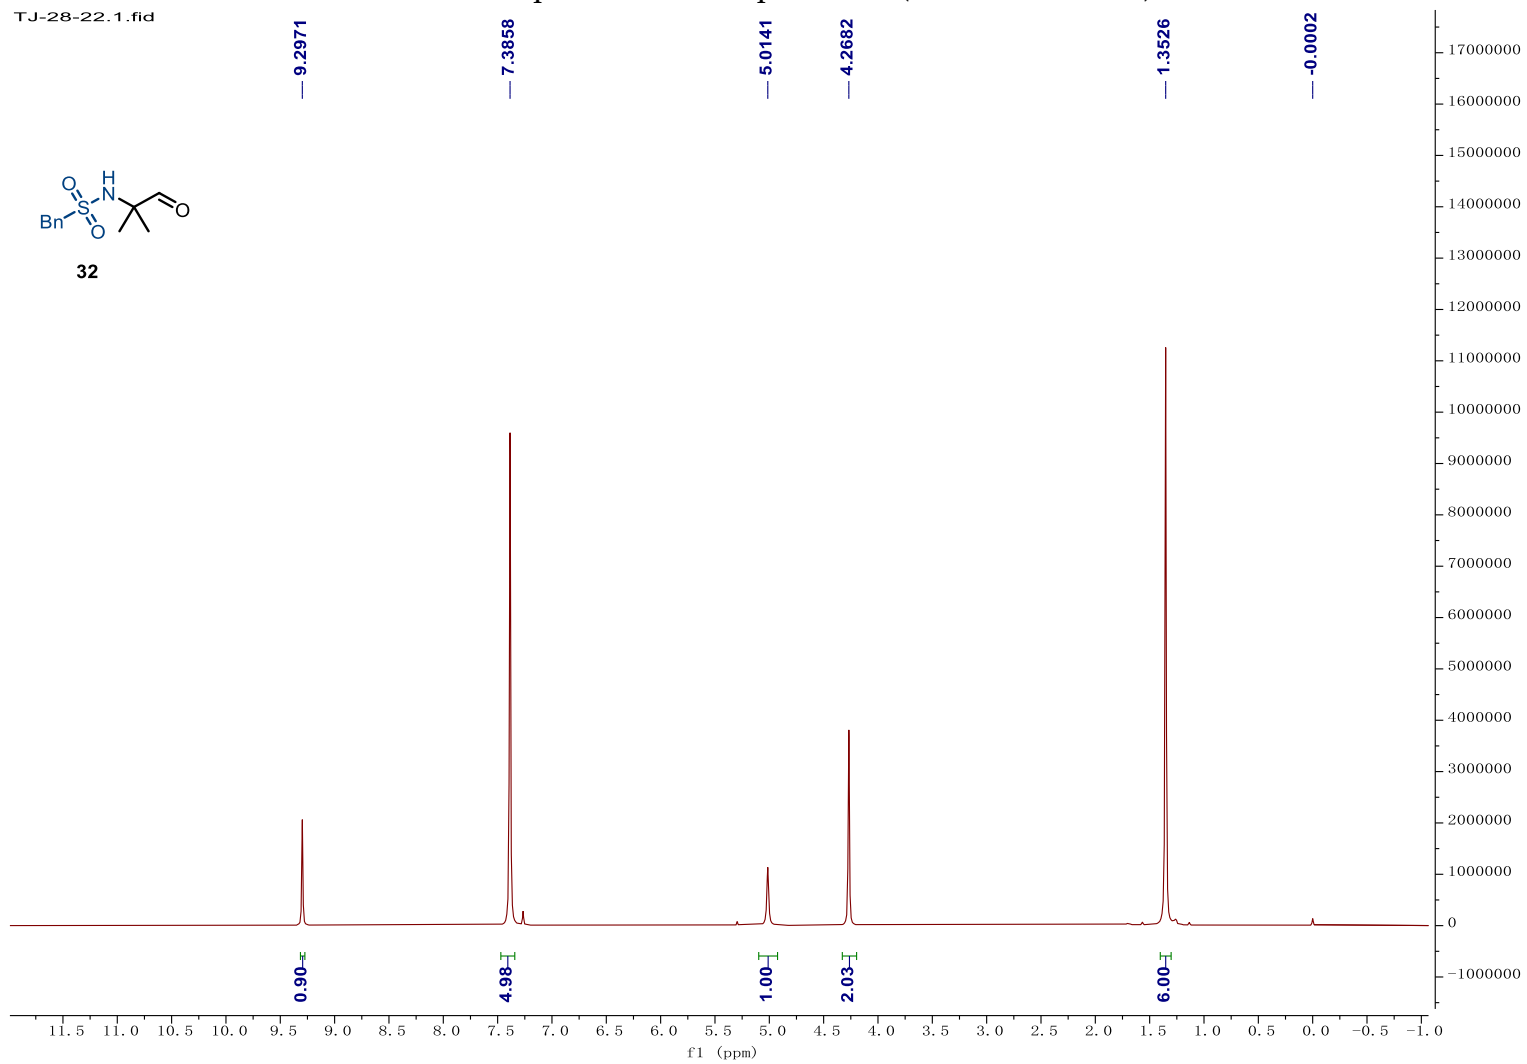

<sup>13</sup>C NMR spectrum of compound 32 (75 MHz, CDCl<sub>3</sub>)

TJ-28-22.fid

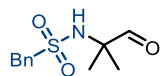

32

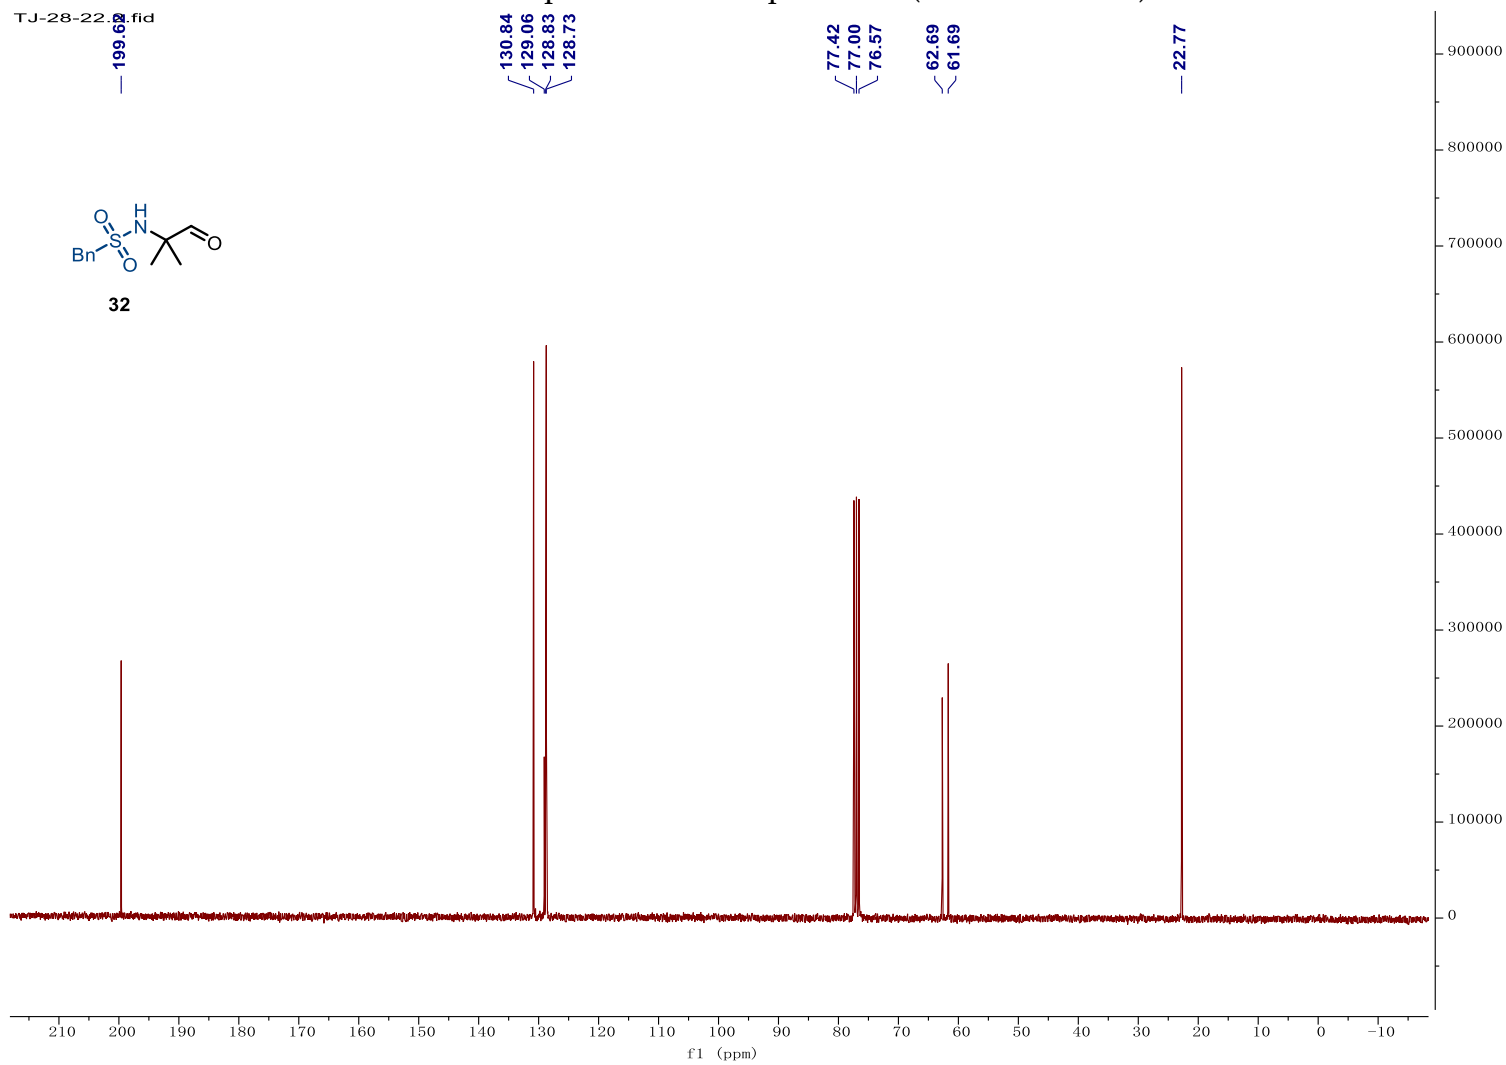

TJ-26-41.1.fid

### $^1\text{H}$ NMR spectrum of compound **33** (300 MHz, $\text{CDCl}_3$ )

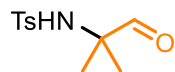

**33**

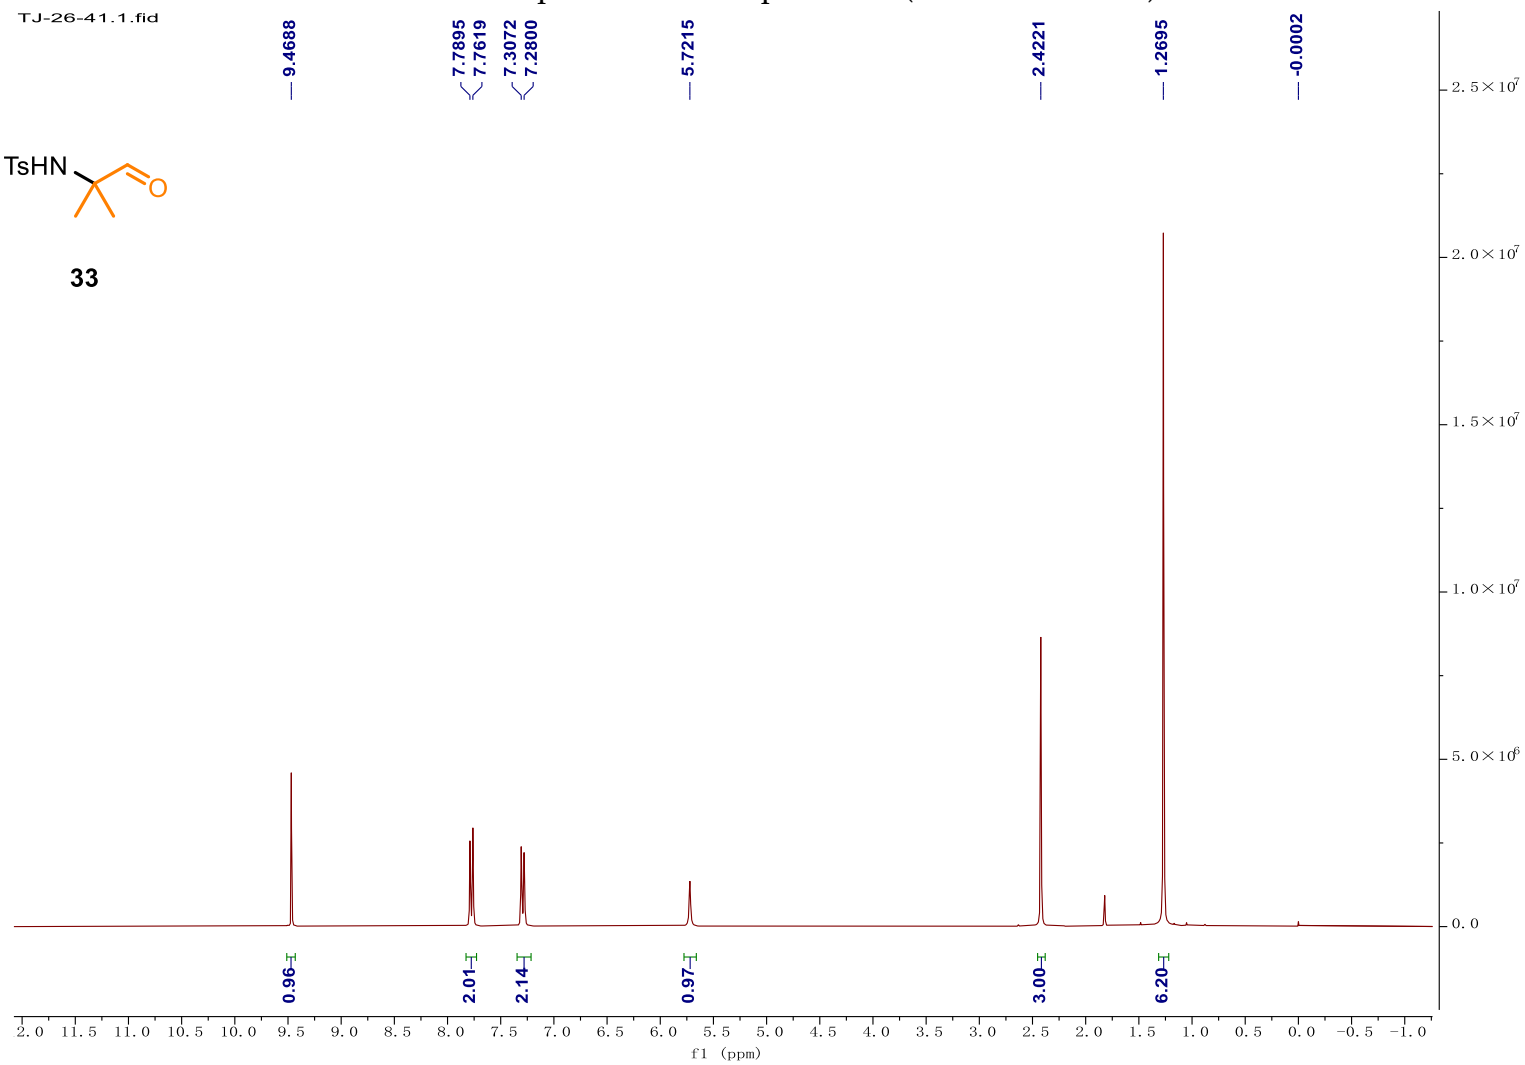

<sup>13</sup>C NMR spectrum of compound 33 (75 MHz, CDCl<sub>3</sub>)

TJ-26-41.2.fid

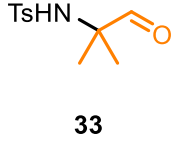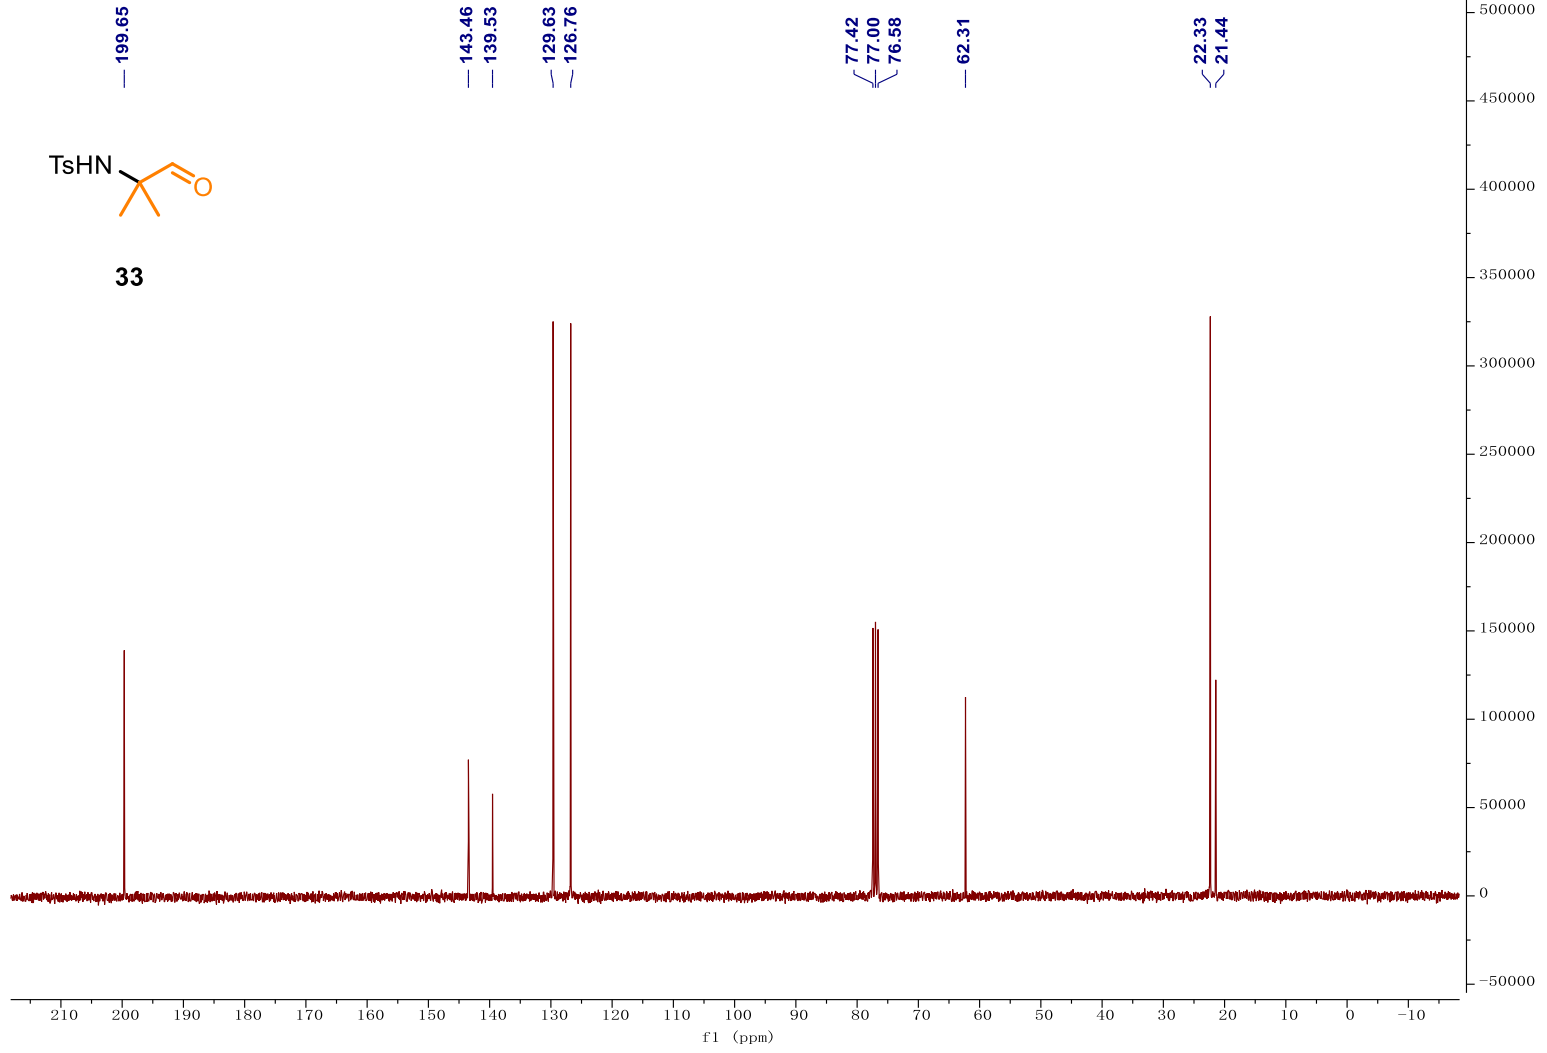

TJ-26-60.1.fid

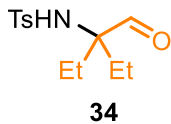

<sup>1</sup>H NMR spectrum of compound **34** (300 MHz, CDCl<sub>3</sub>)

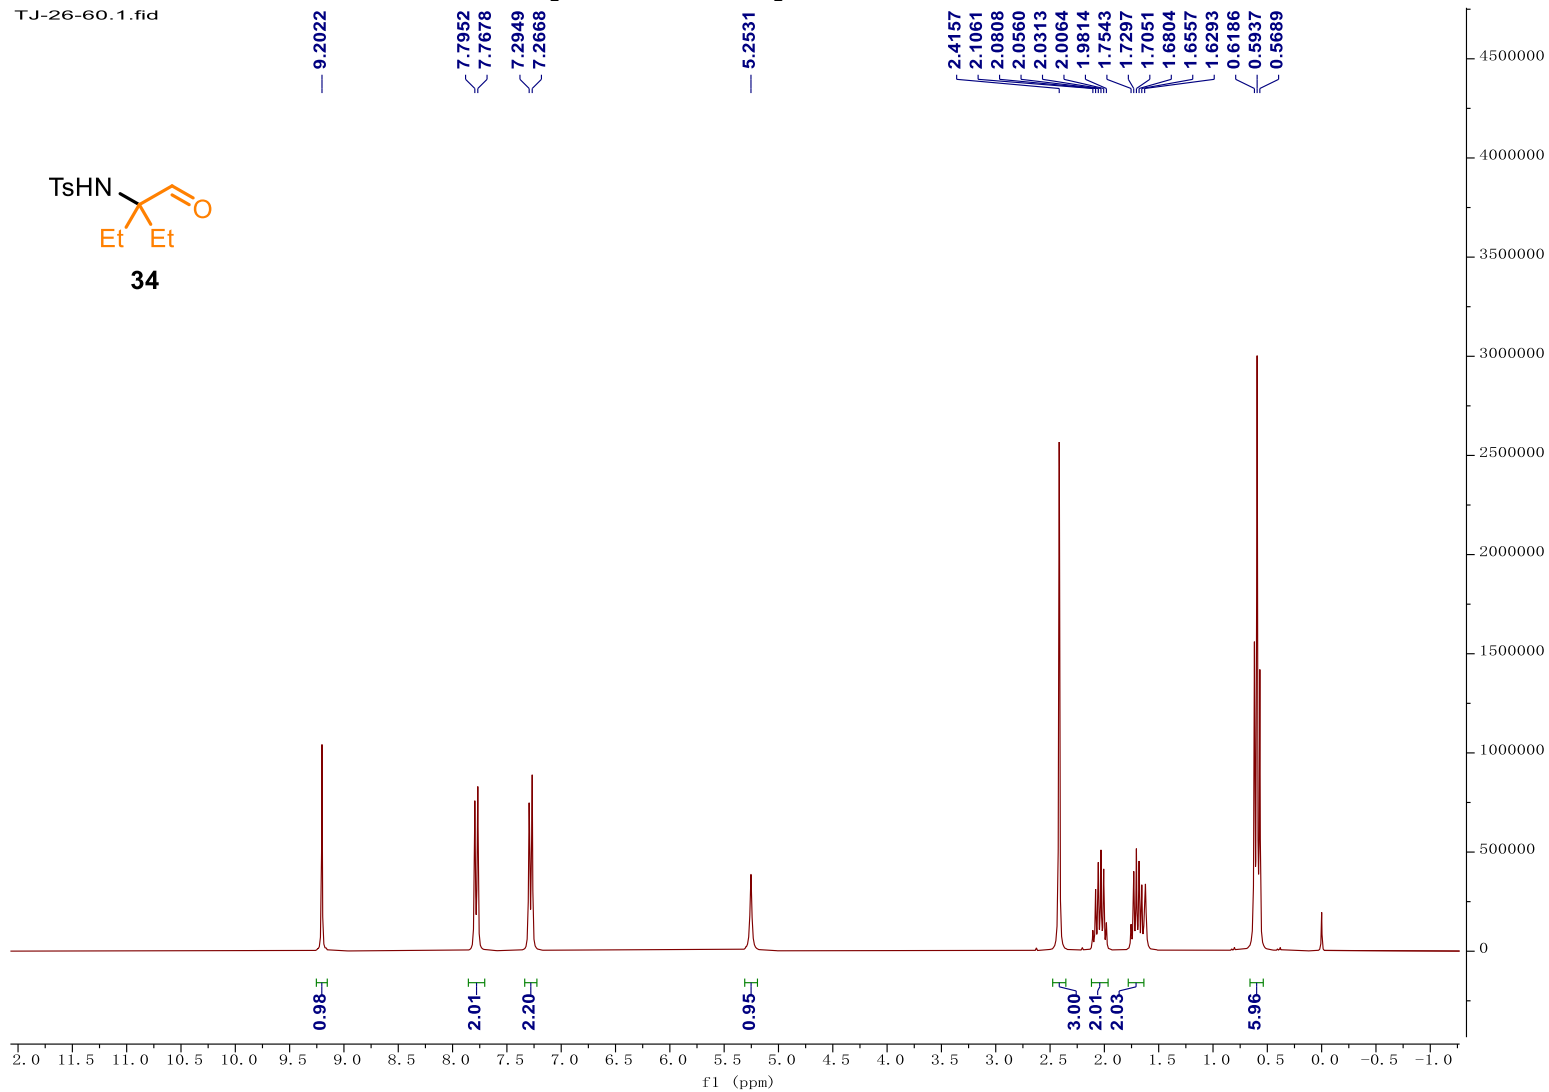

<sup>13</sup>C NMR spectrum of compound 34 (75 MHz, CDCl<sub>3</sub>)

TJ-26-60.8.fid

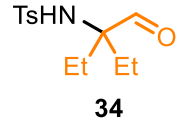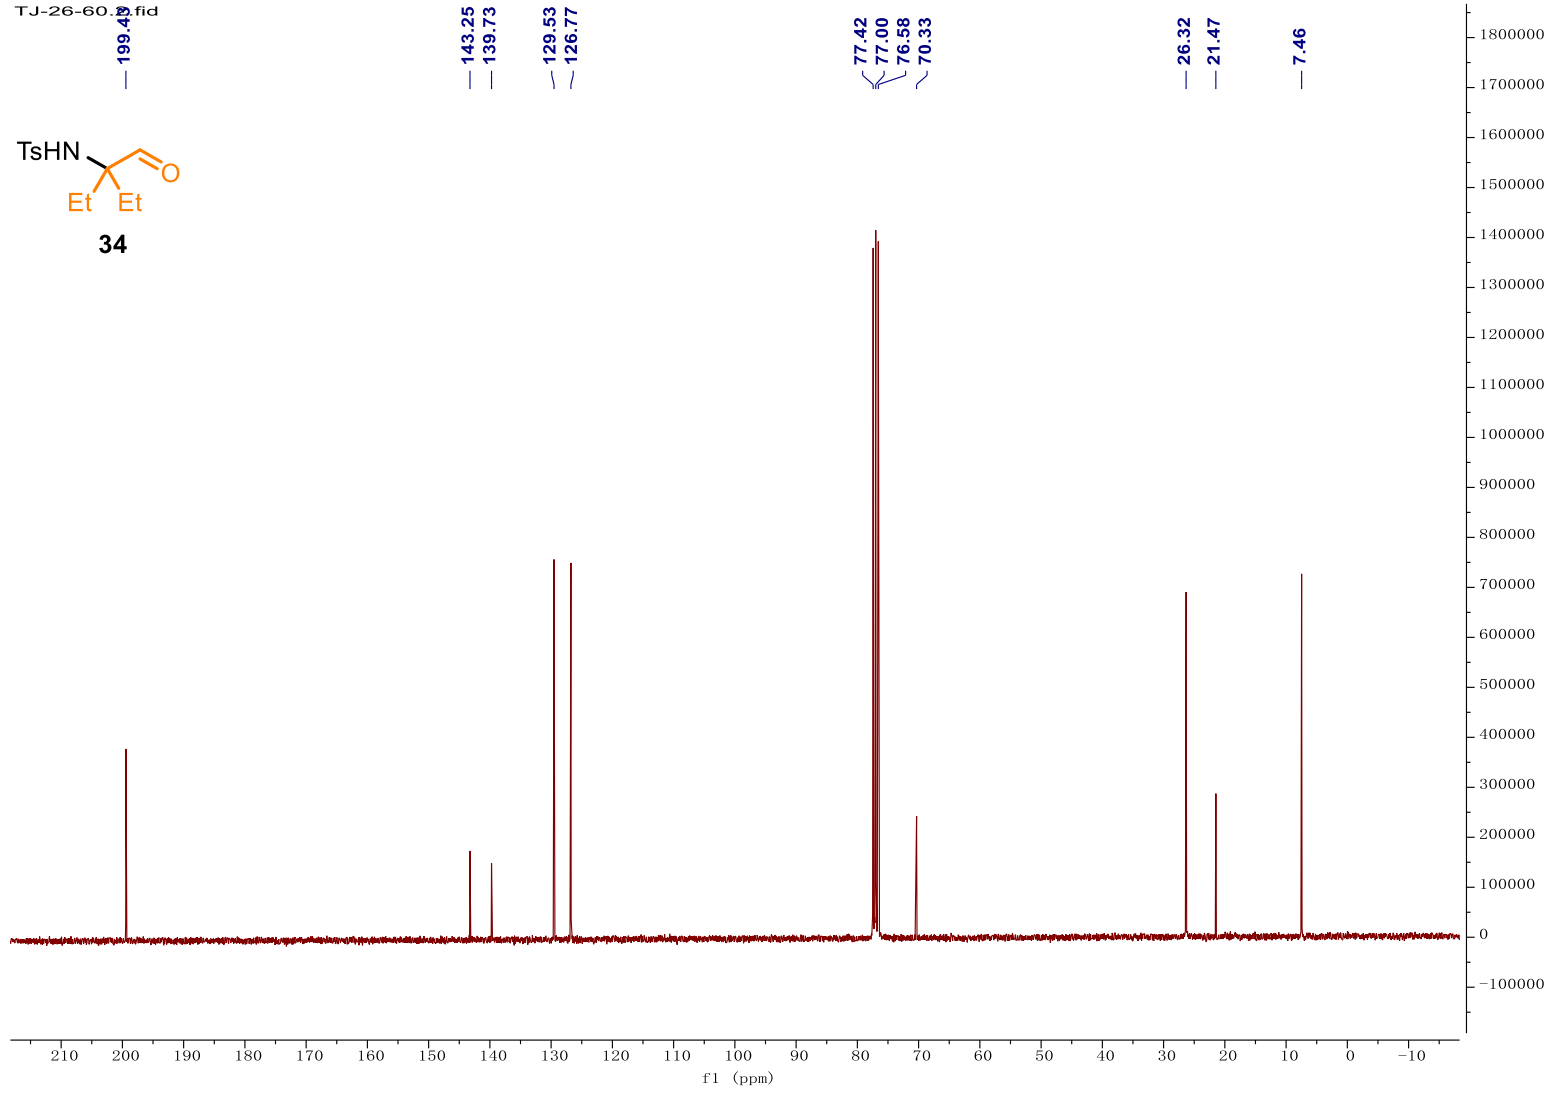



<sup>13</sup>C NMR spectrum of compound 35 (75 MHz, CDCl<sub>3</sub>)

TJ-27-1.2.fid

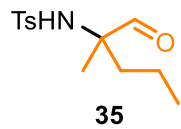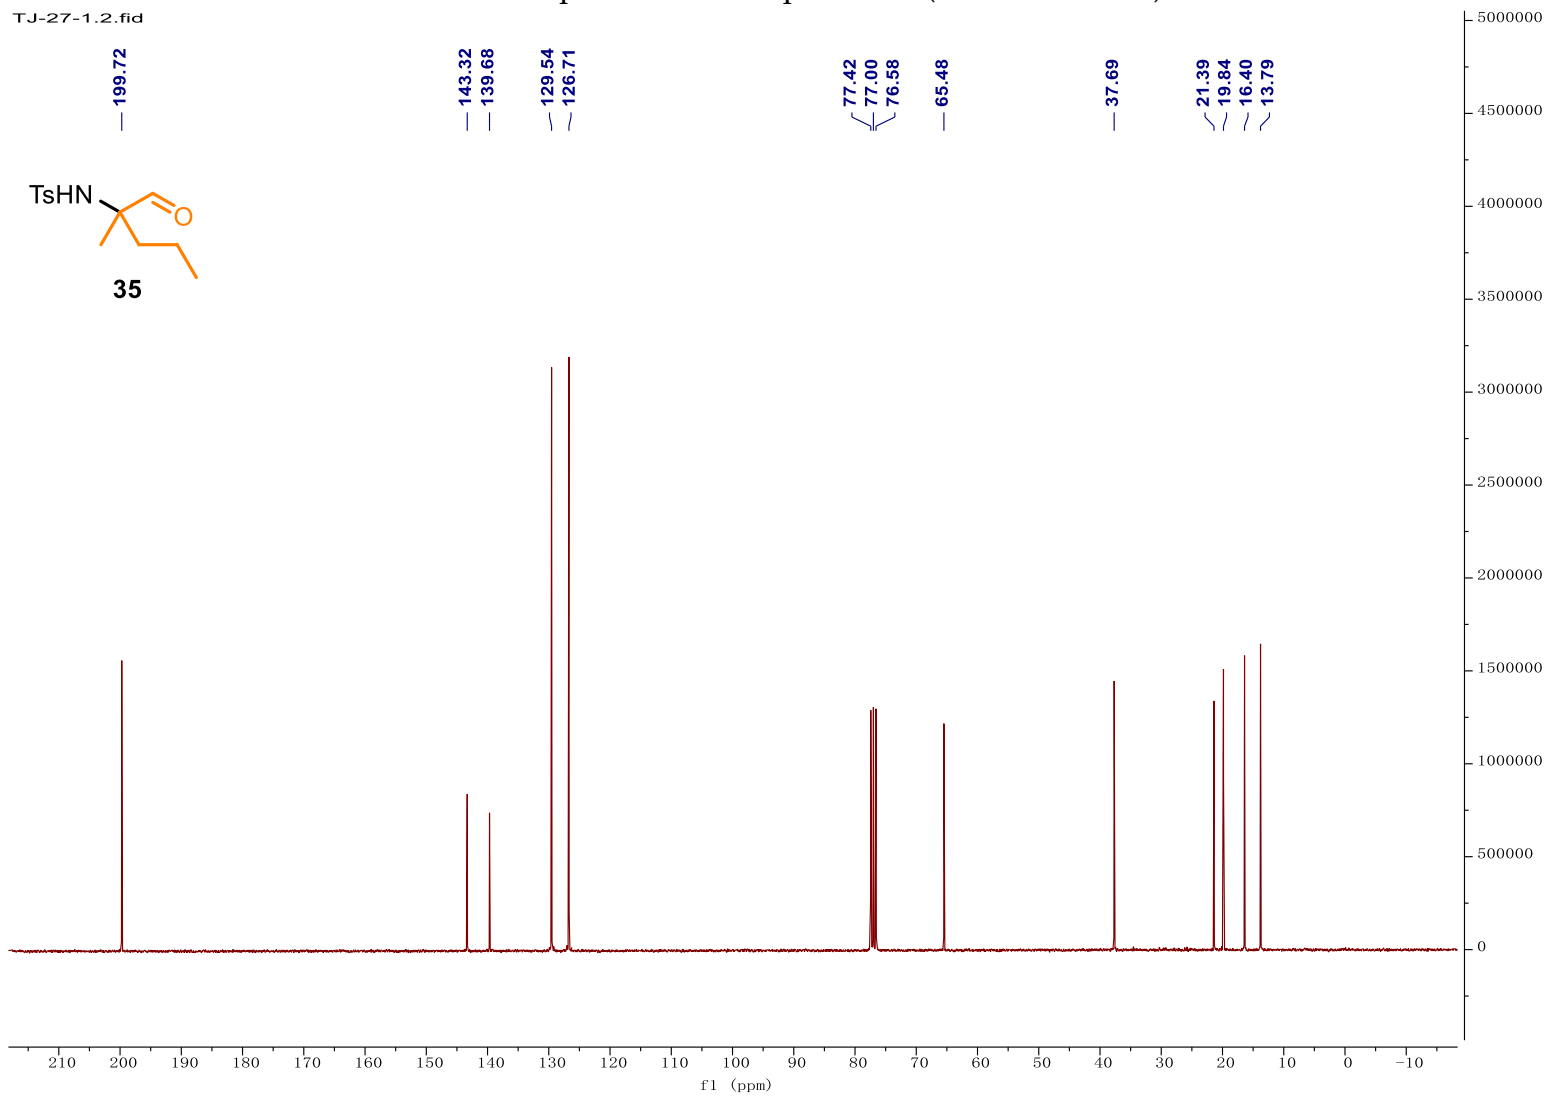

<sup>1</sup>H NMR spectrum of compound 36 (300 MHz, CDCl<sub>3</sub>)

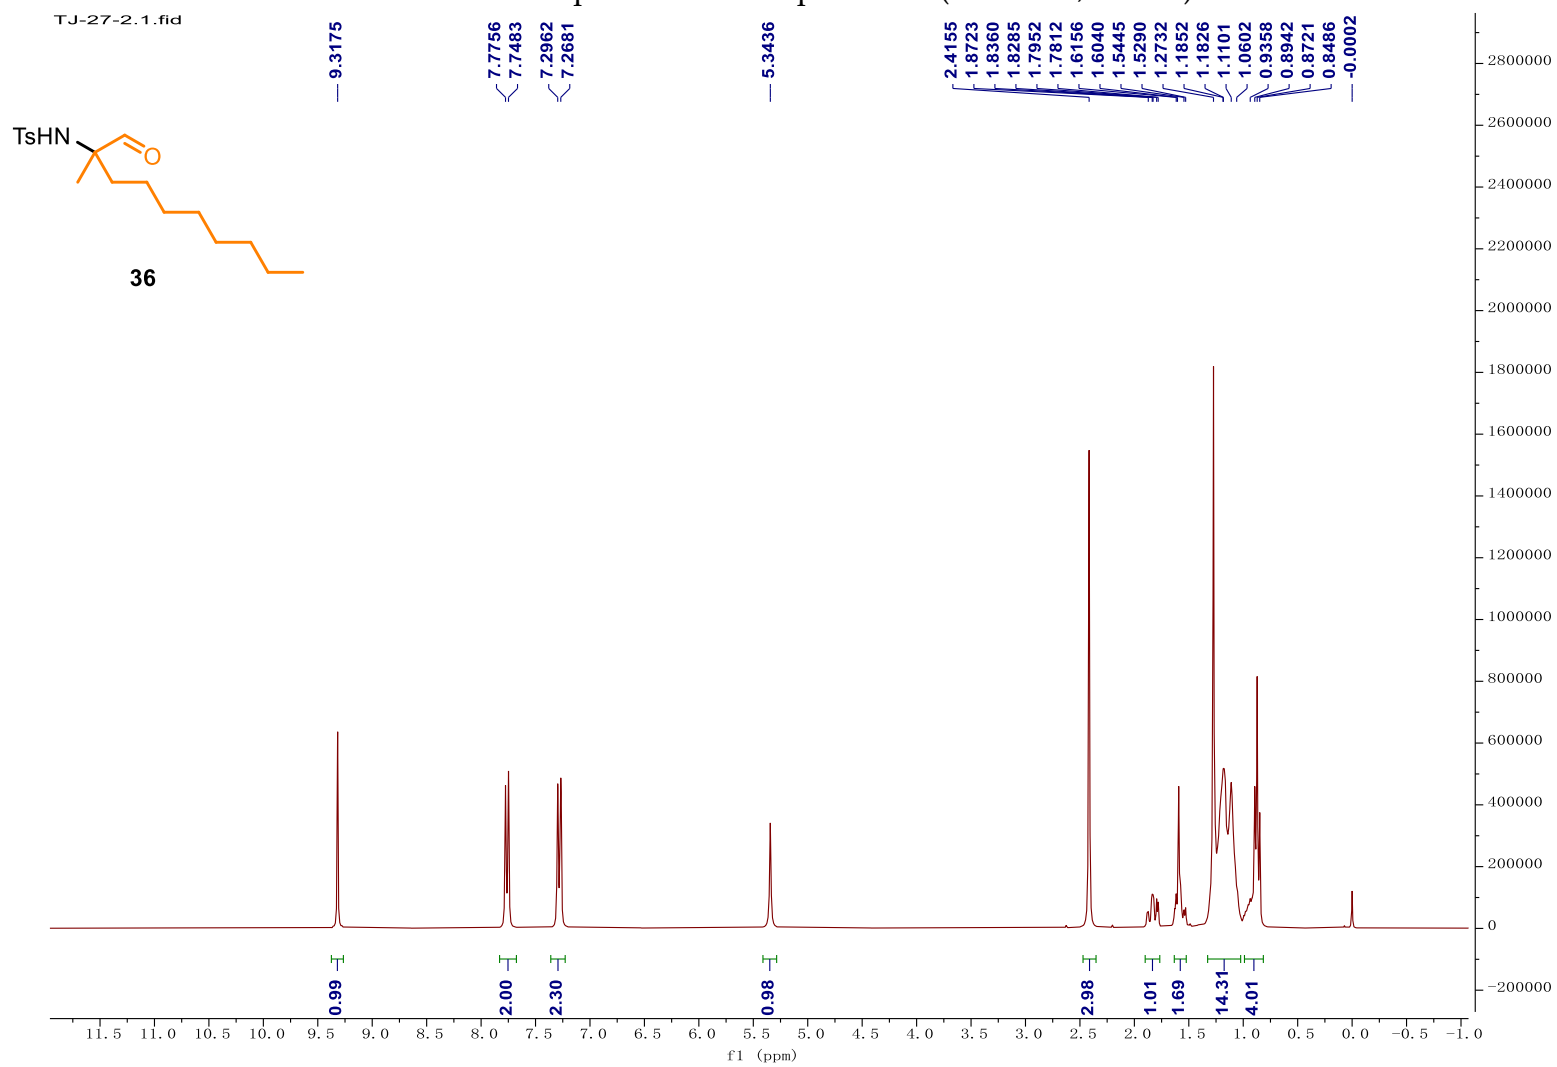

<sup>13</sup>C NMR spectrum of compound 36 (75 MHz, CDCl<sub>3</sub>)

TJ-27-2.4.fid

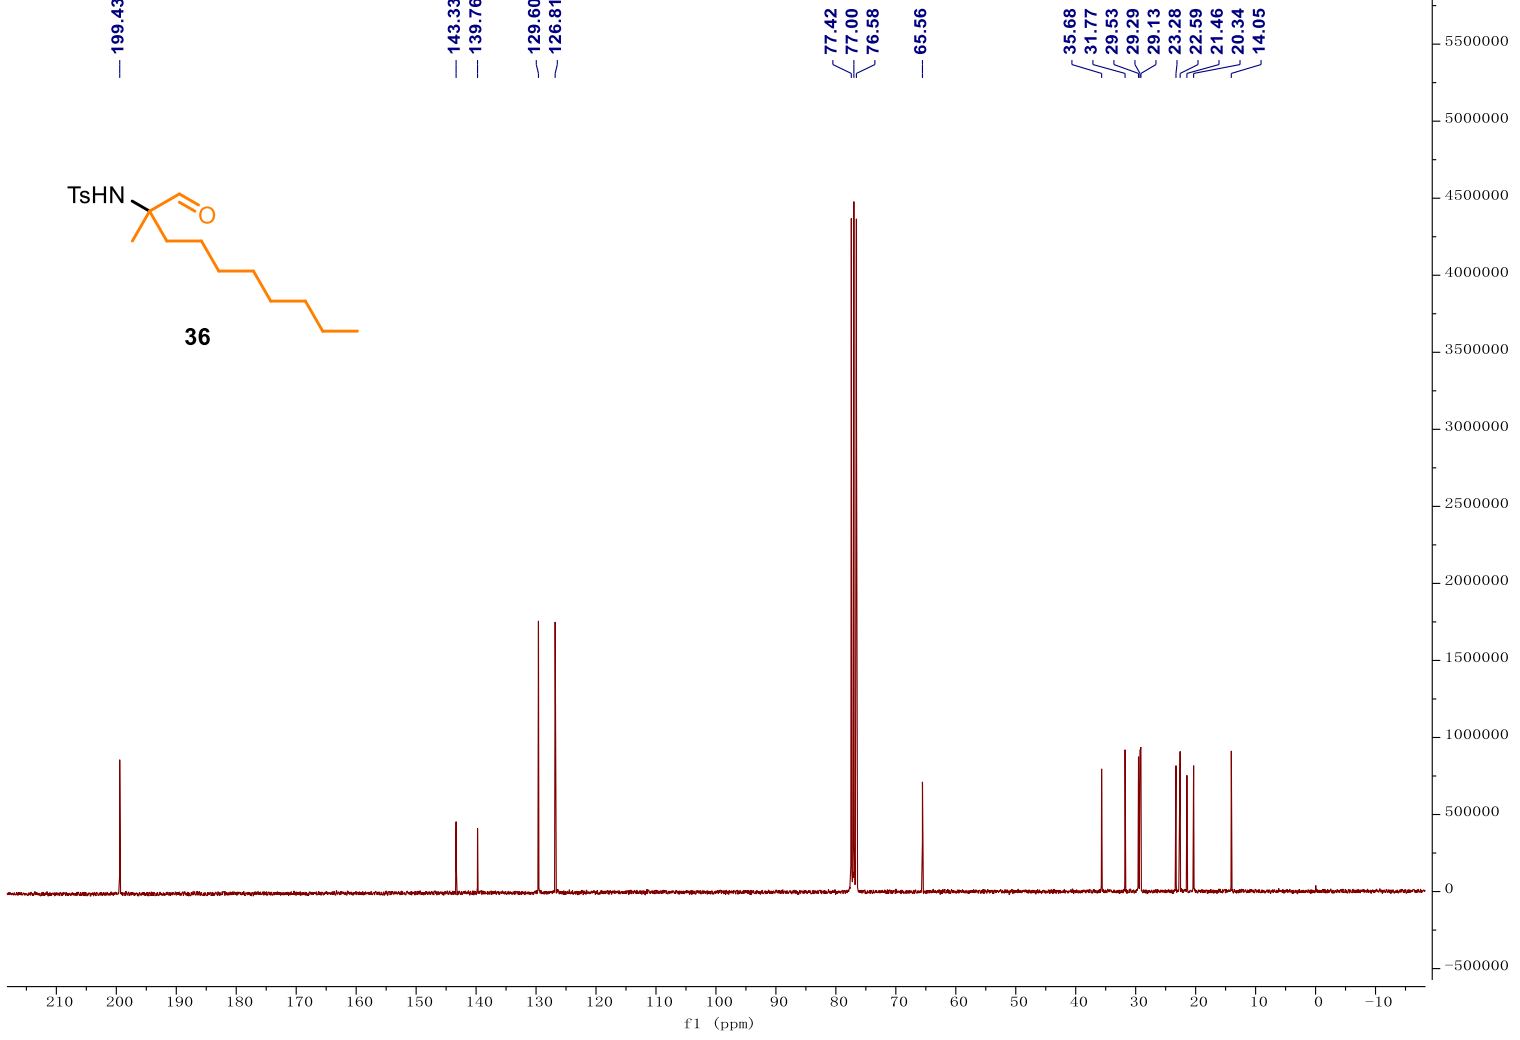

TJ-26-40.10.fid

<sup>1</sup>H NMR spectrum of compound 37 (300 MHz, CDCl<sub>3</sub>)

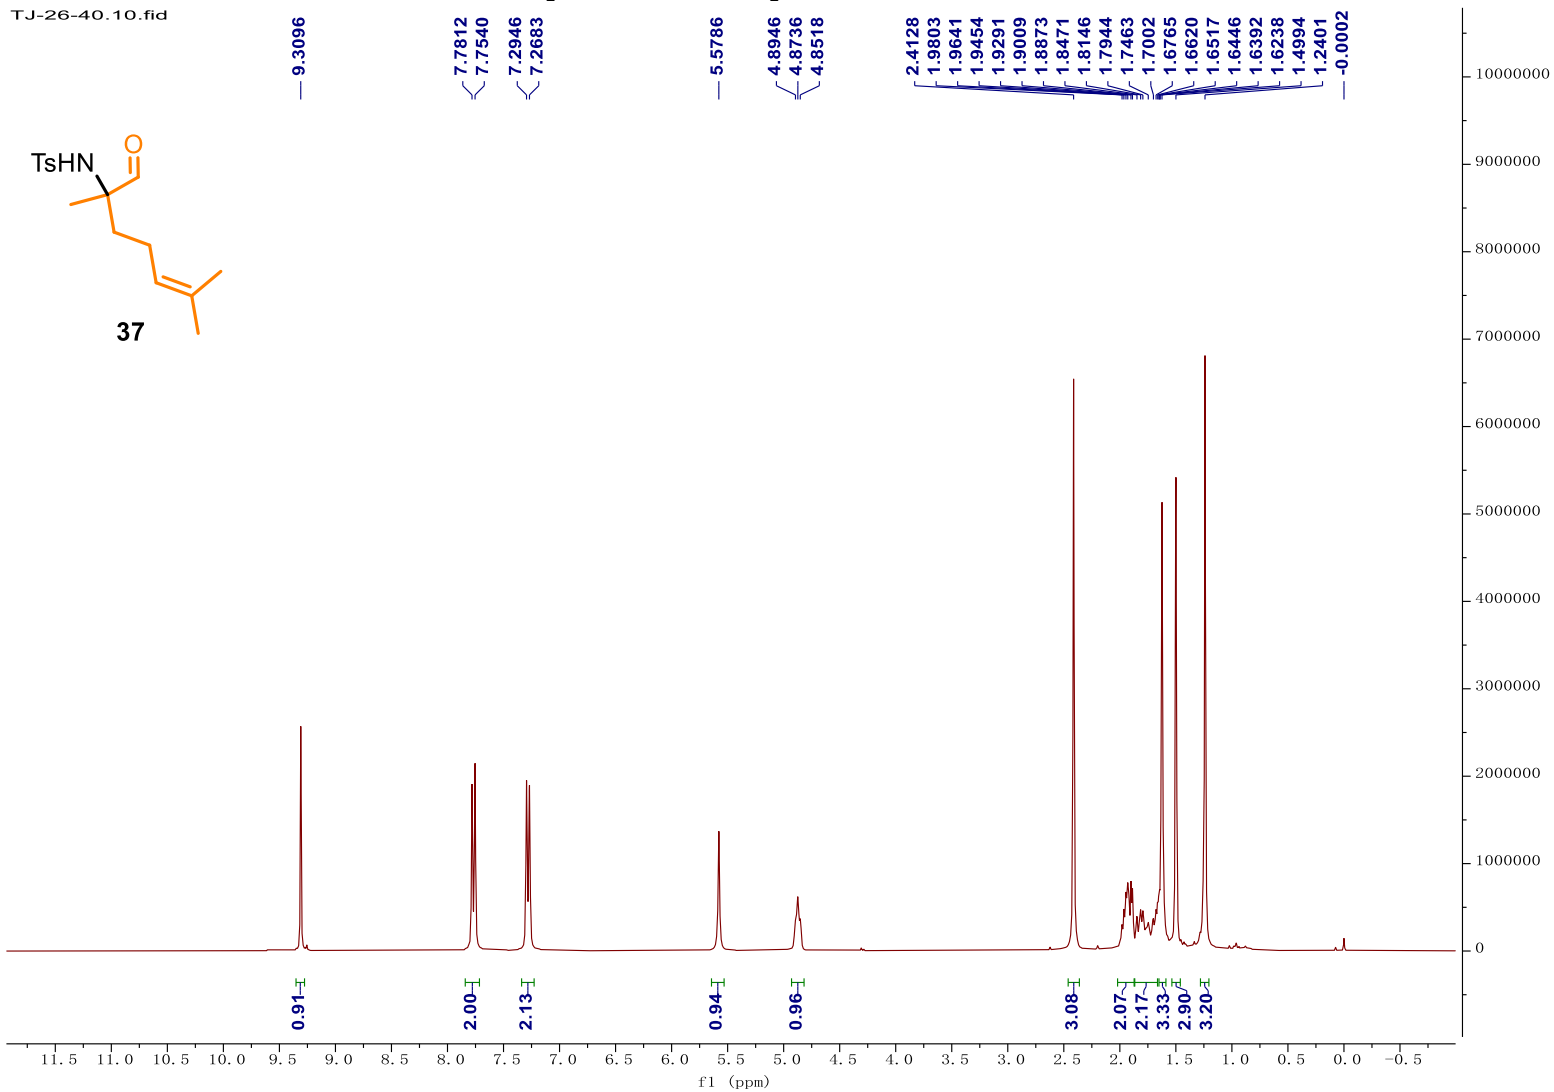

<sup>13</sup>C NMR spectrum of compound 37 (75 MHz, CDCl<sub>3</sub>)

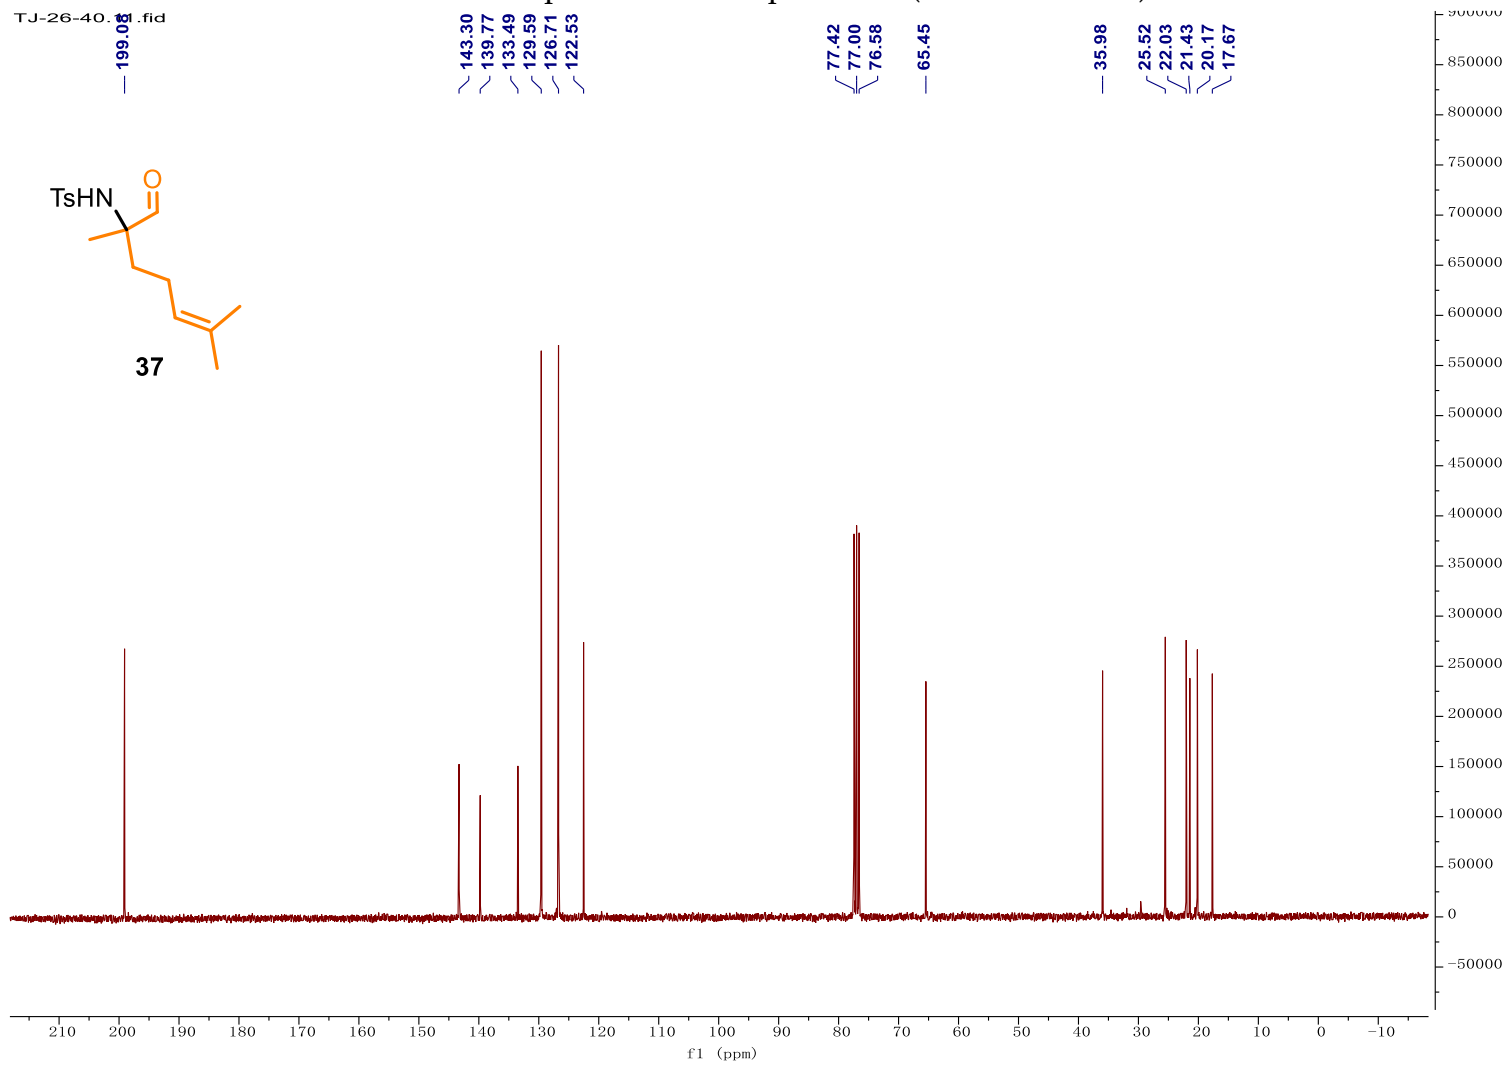

<sup>1</sup>H NMR spectrum of compound 38 (300 MHz, CDCl<sub>3</sub>)

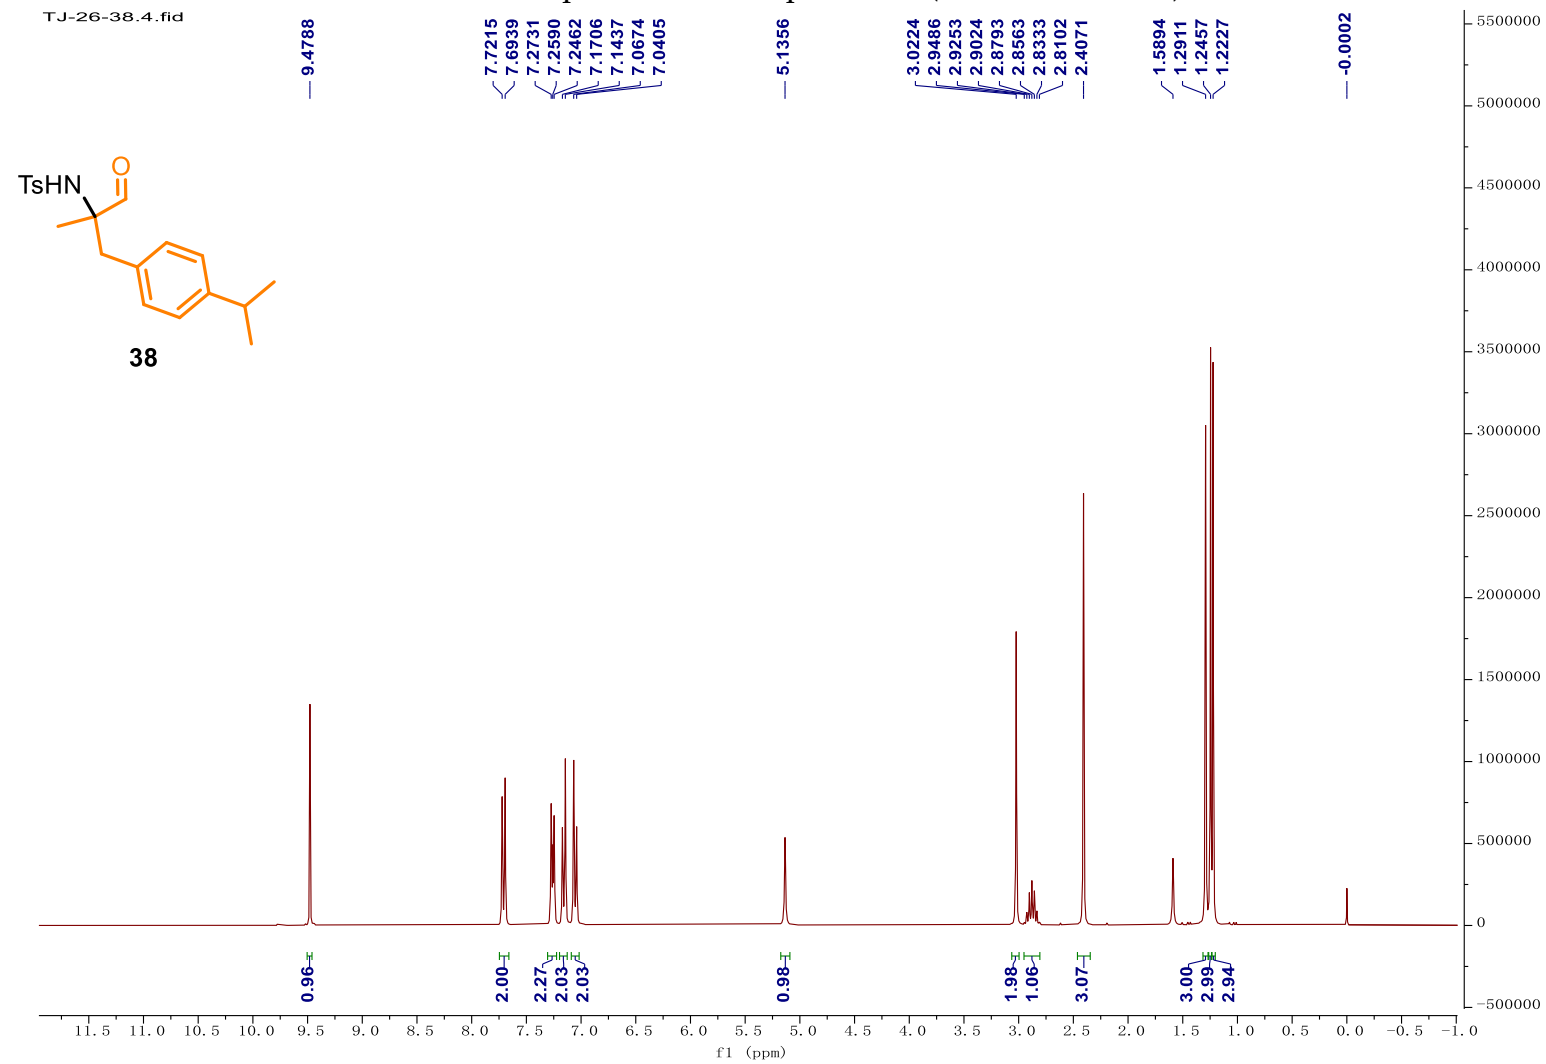

<sup>13</sup>C NMR spectrum of compound 38 (75 MHz, CDCl<sub>3</sub>)

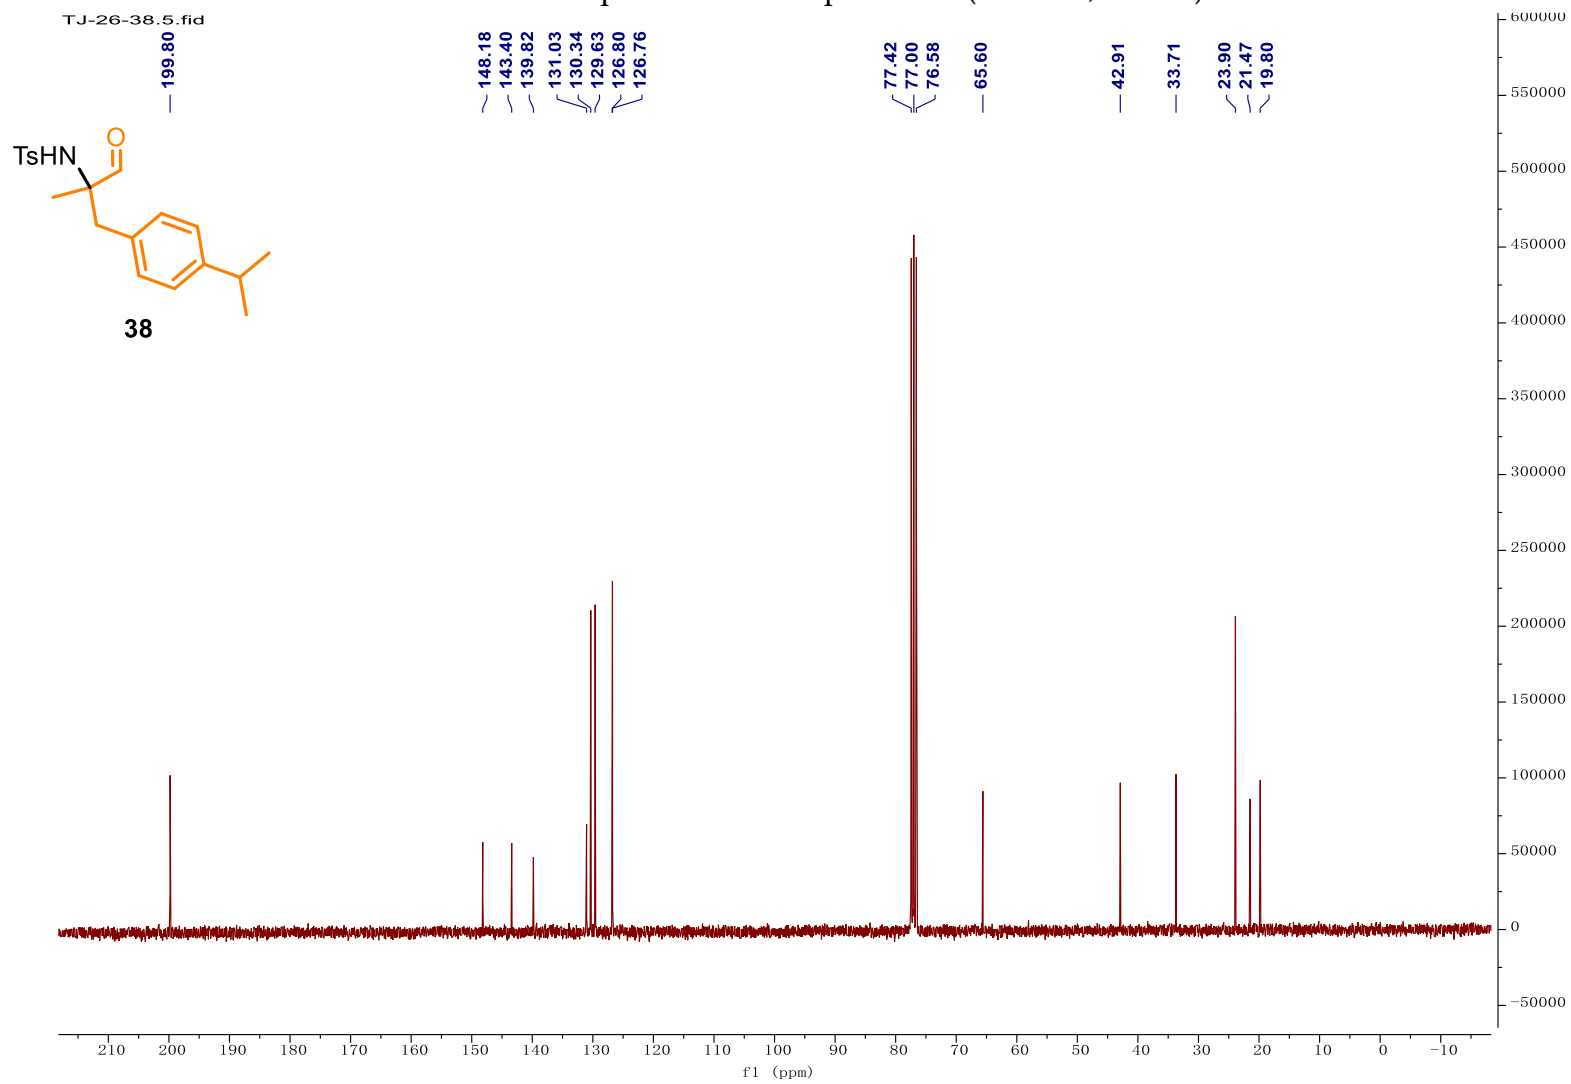

<sup>1</sup>H NMR spectrum of compound **39** (300 MHz, CDCl<sub>3</sub>)

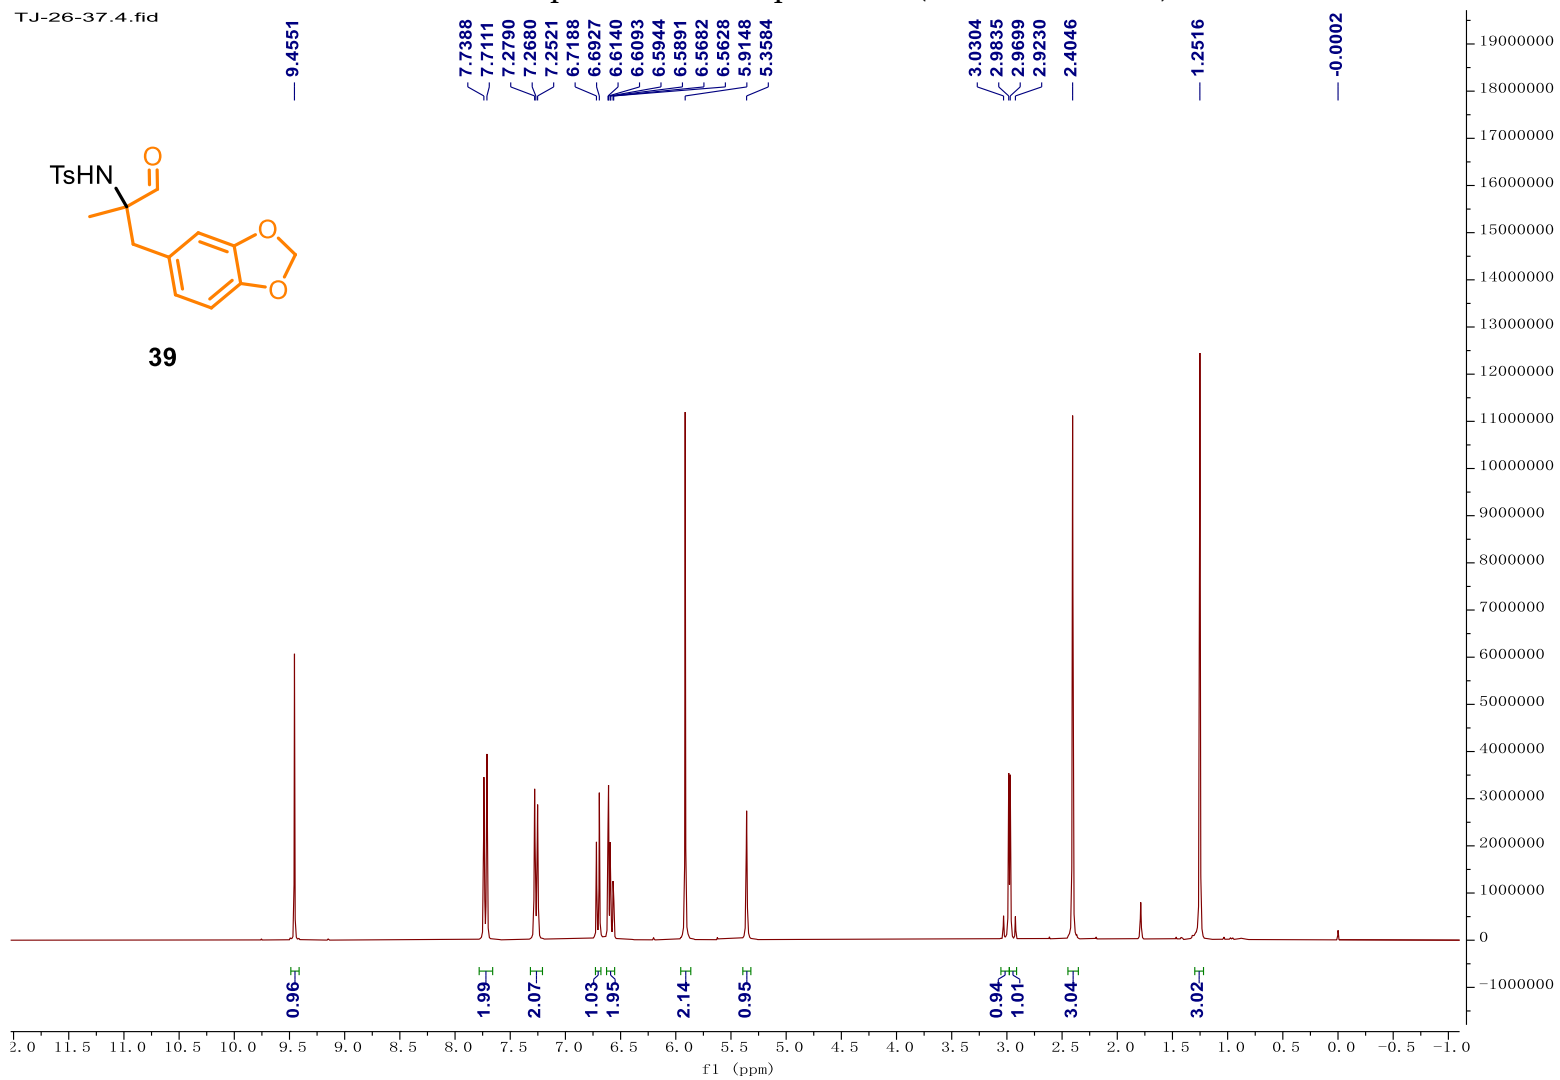

<sup>13</sup>C NMR spectrum of compound 39 (75 MHz, CDCl<sub>3</sub>)

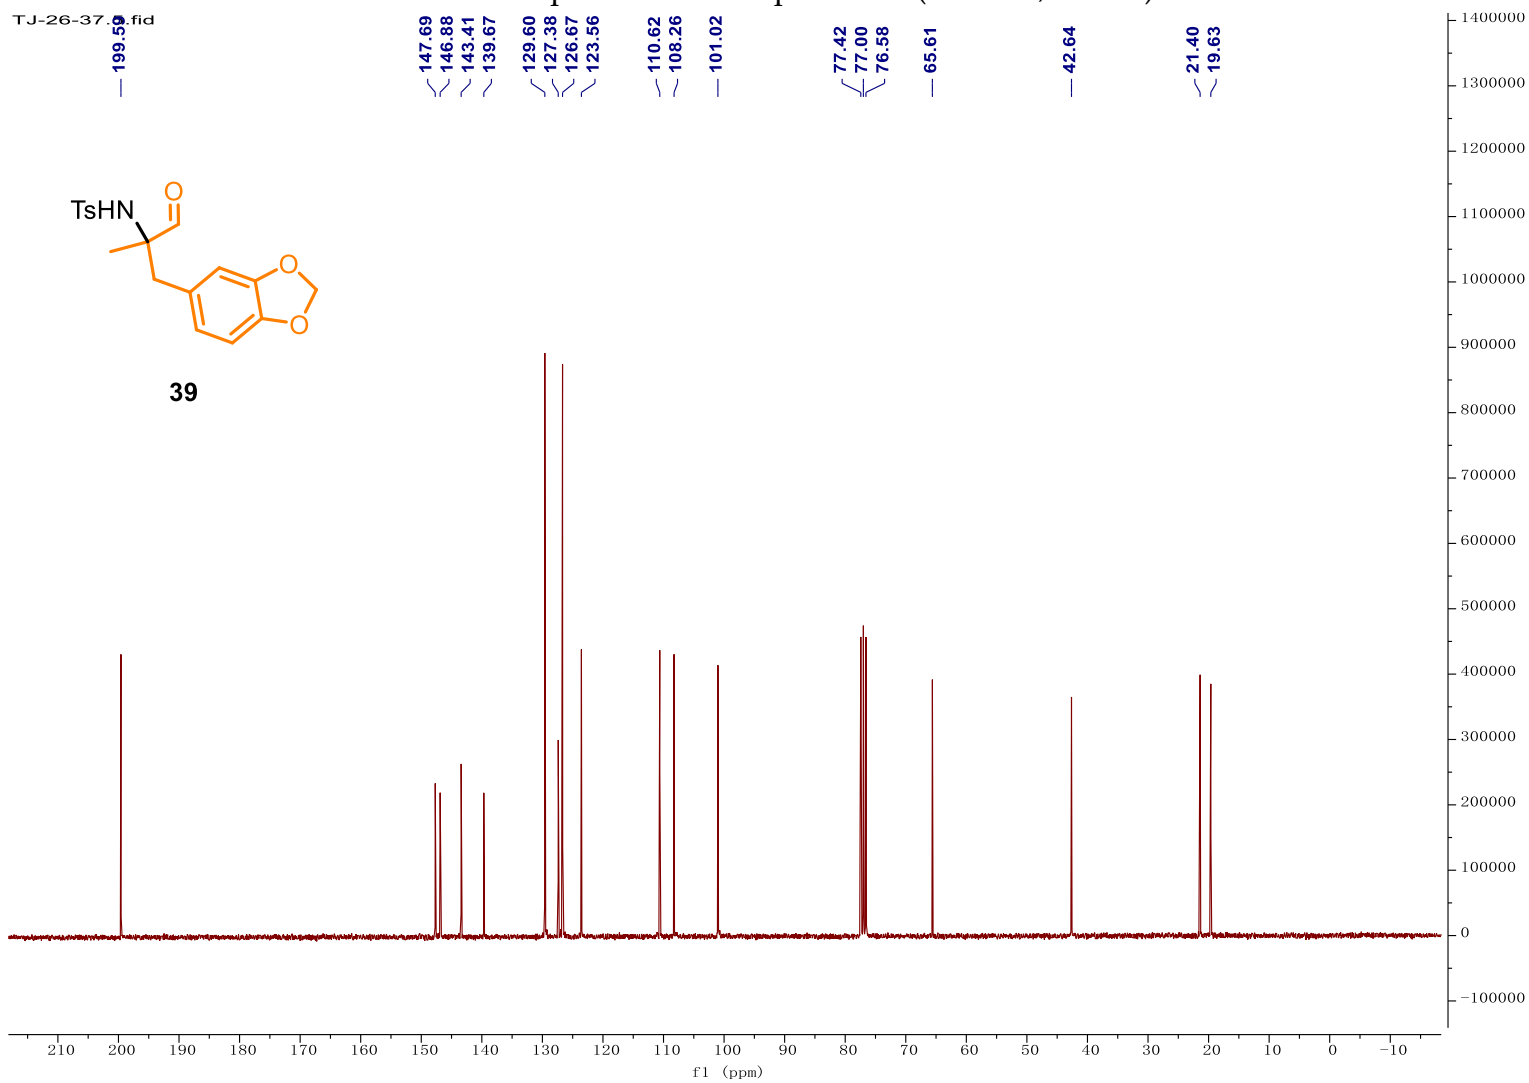

<sup>1</sup>H NMR spectrum of compound **40** (300 MHz, CDCl<sub>3</sub>)

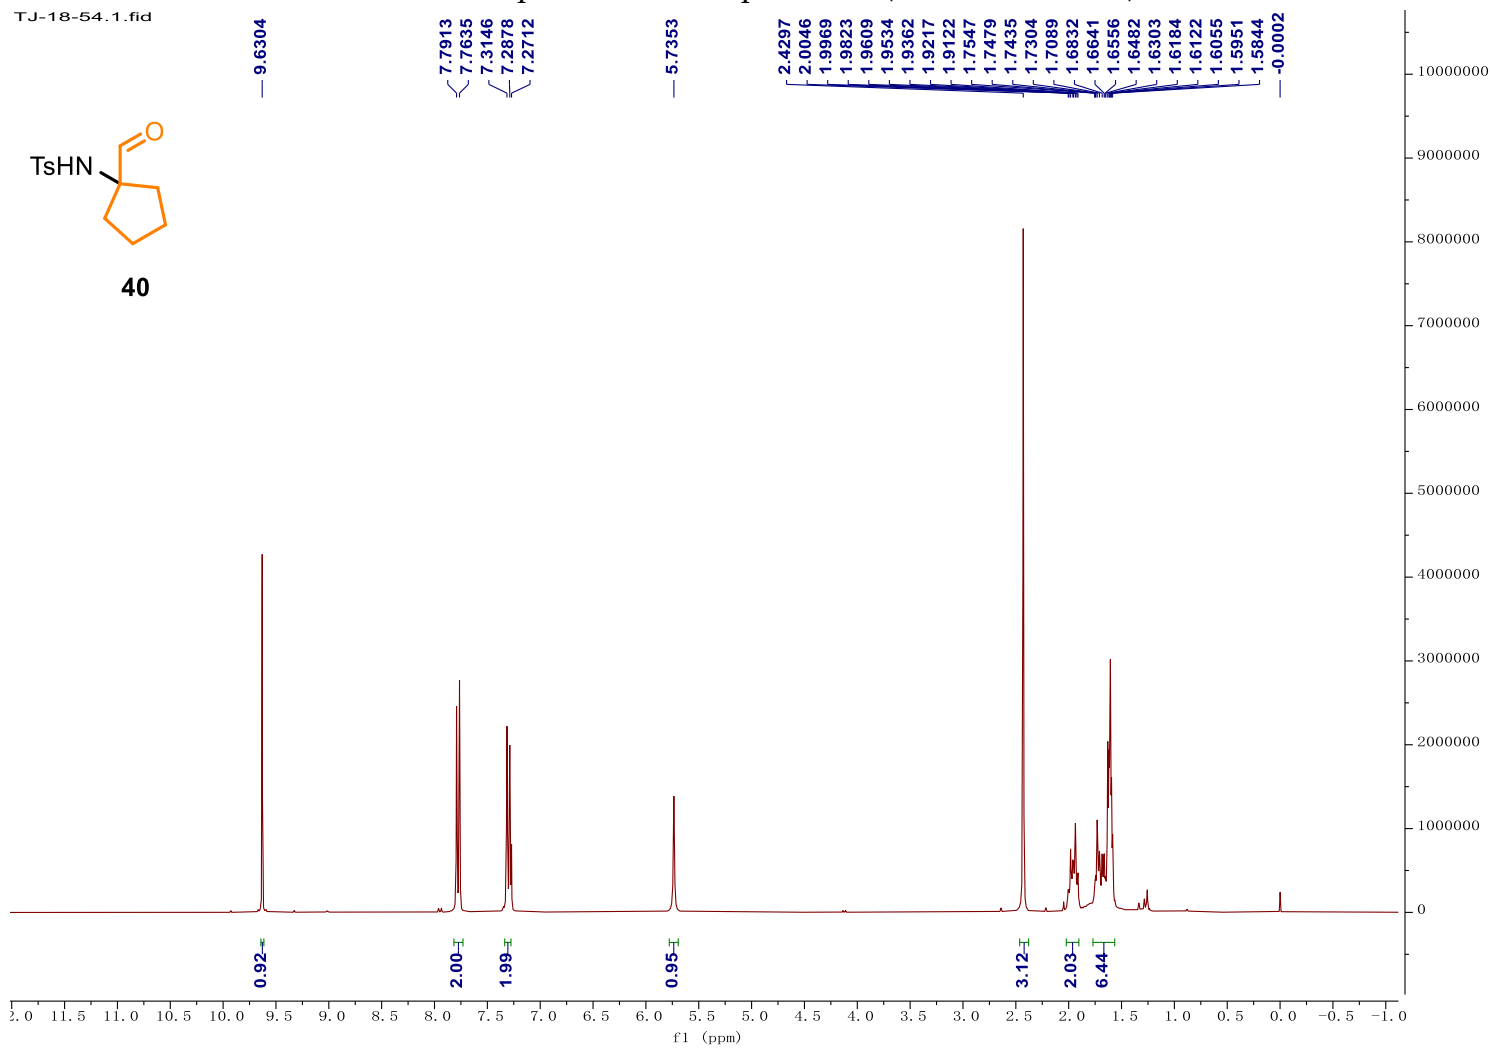

<sup>13</sup>C NMR spectrum of compound 40 (75 MHz, CDCl<sub>3</sub>)

TJ-18-54.2.fid

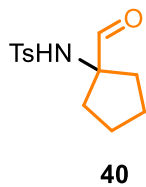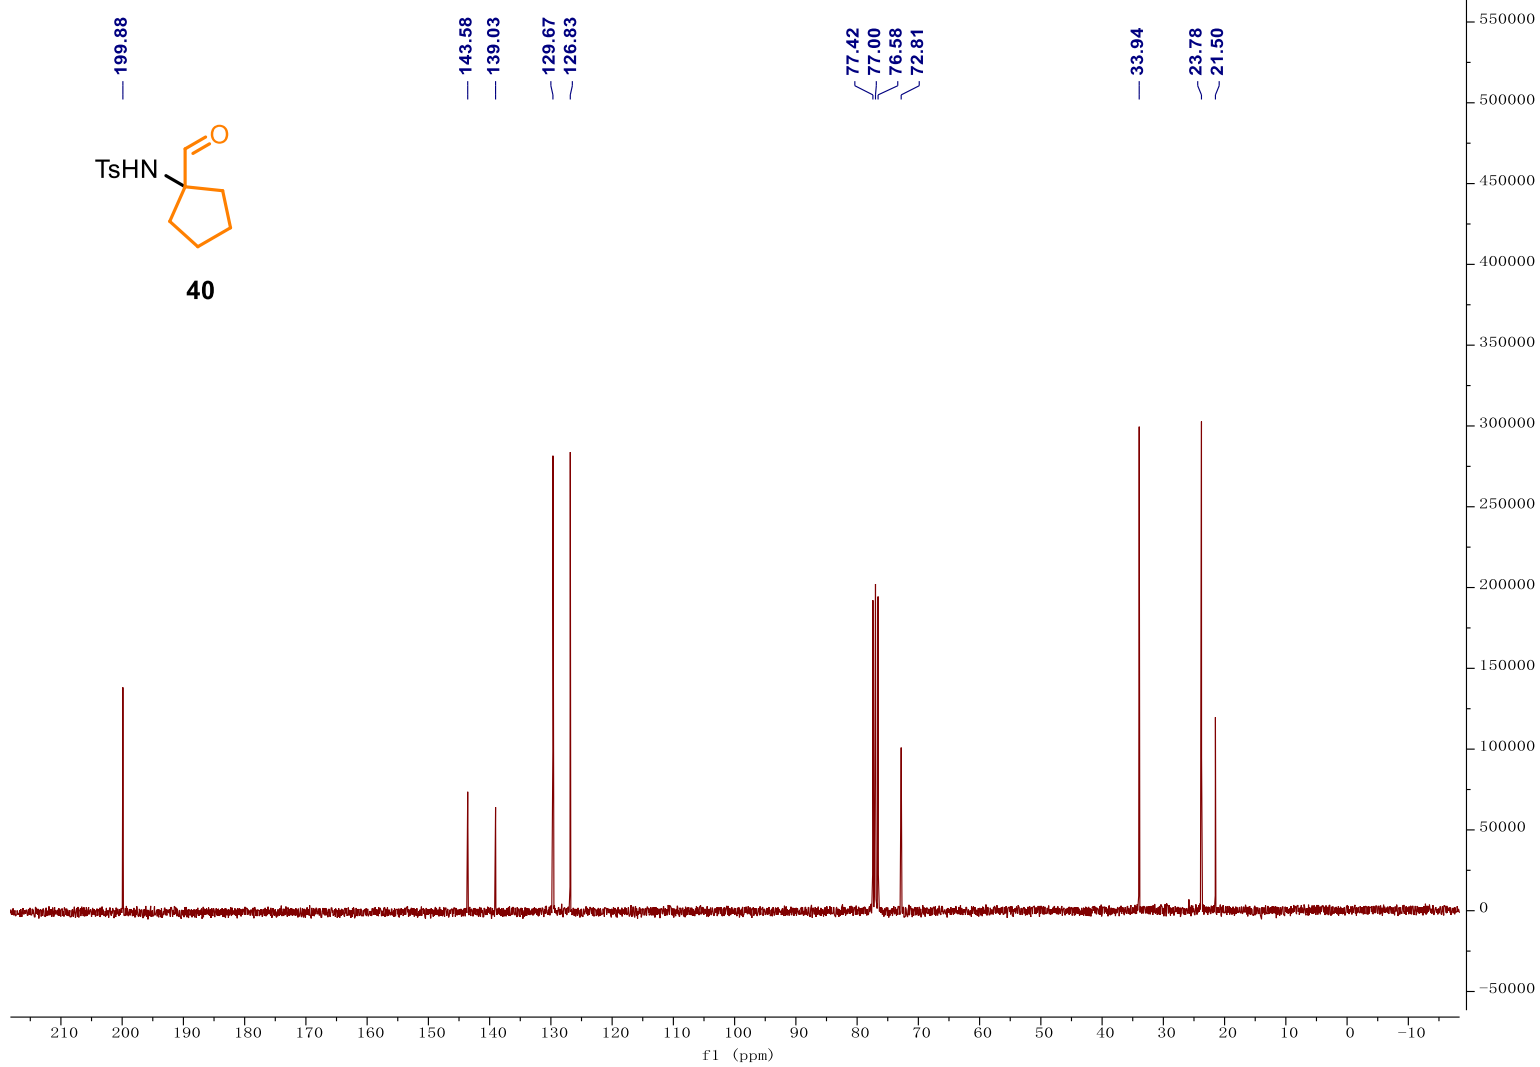

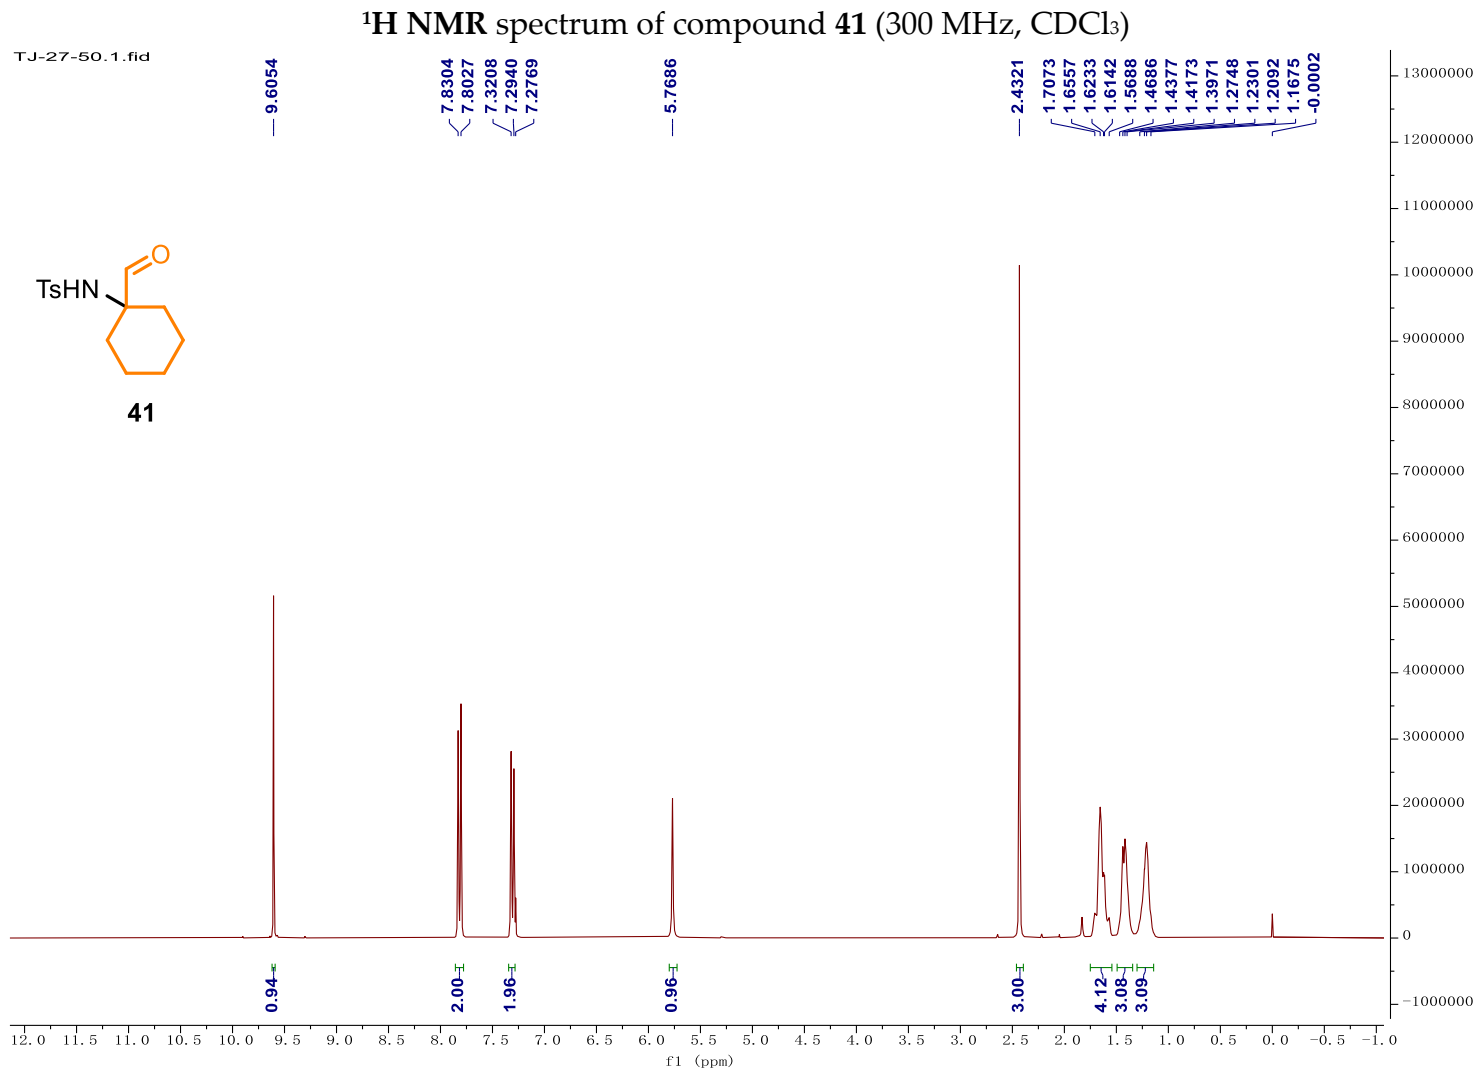

<sup>13</sup>C NMR spectrum of compound **41** (75 MHz, CDCl<sub>3</sub>)

TJ-27-50.2.fid

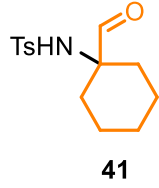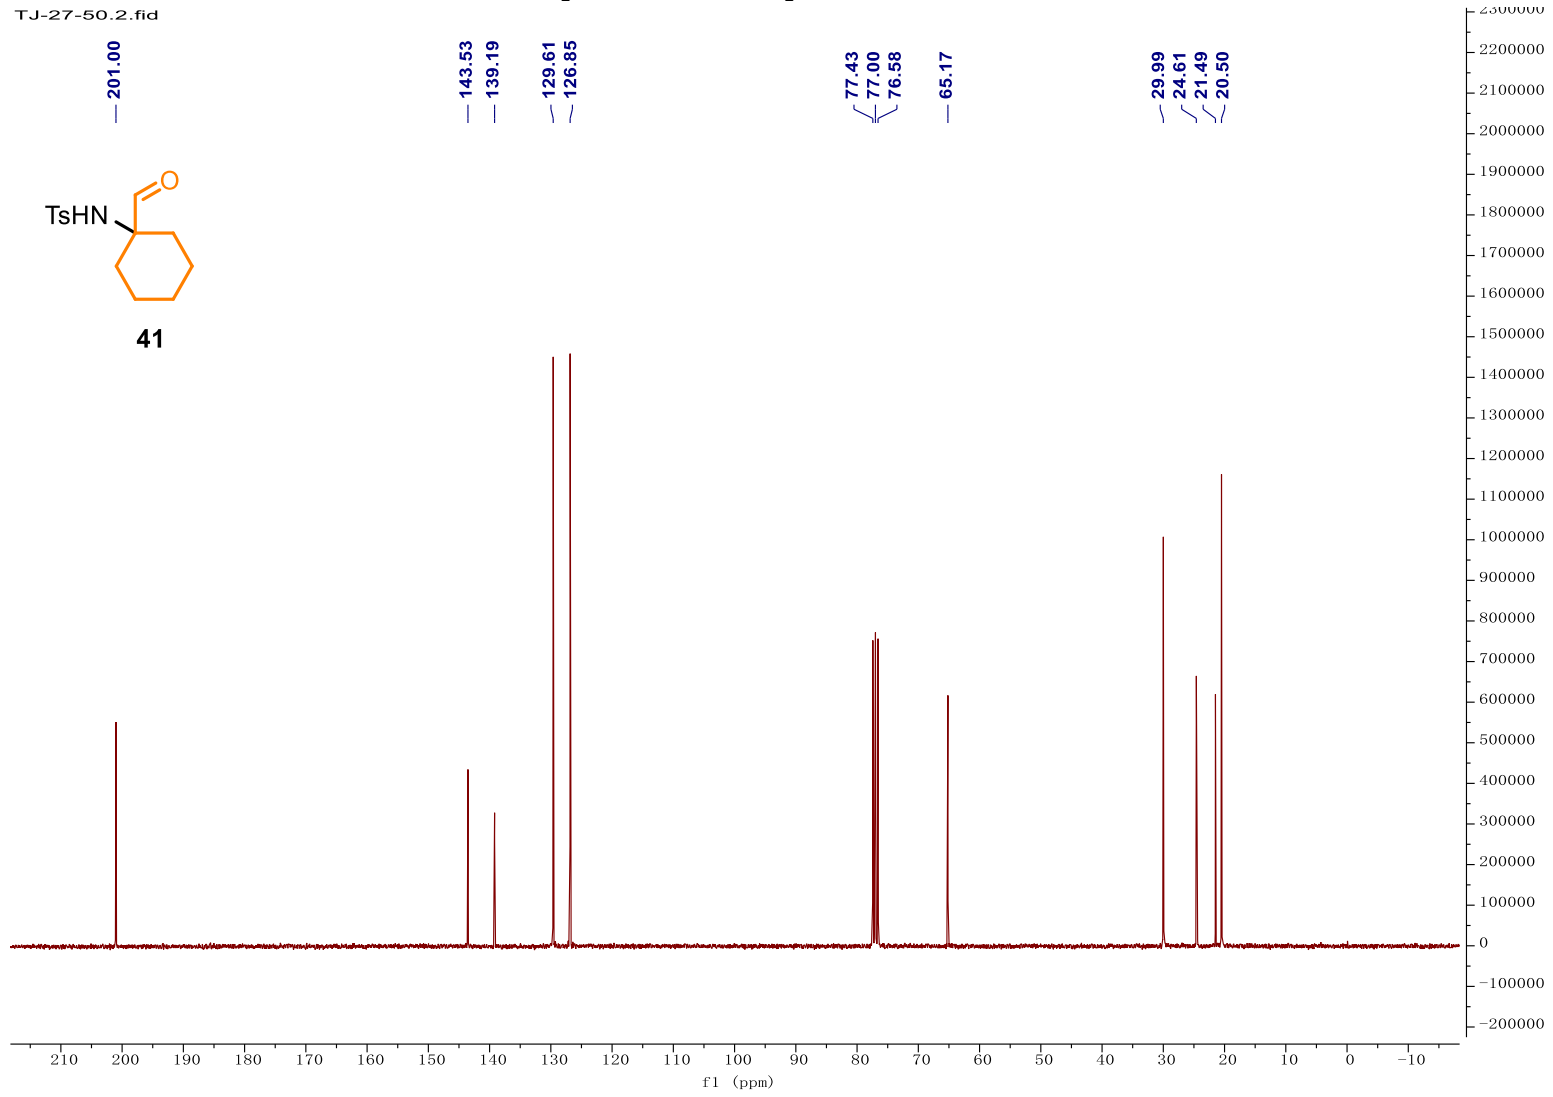

TJ-27-44.1.fid

### <sup>1</sup>H NMR spectrum of compound 42 (300 MHz, CDCl<sub>3</sub>)

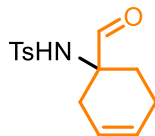

42

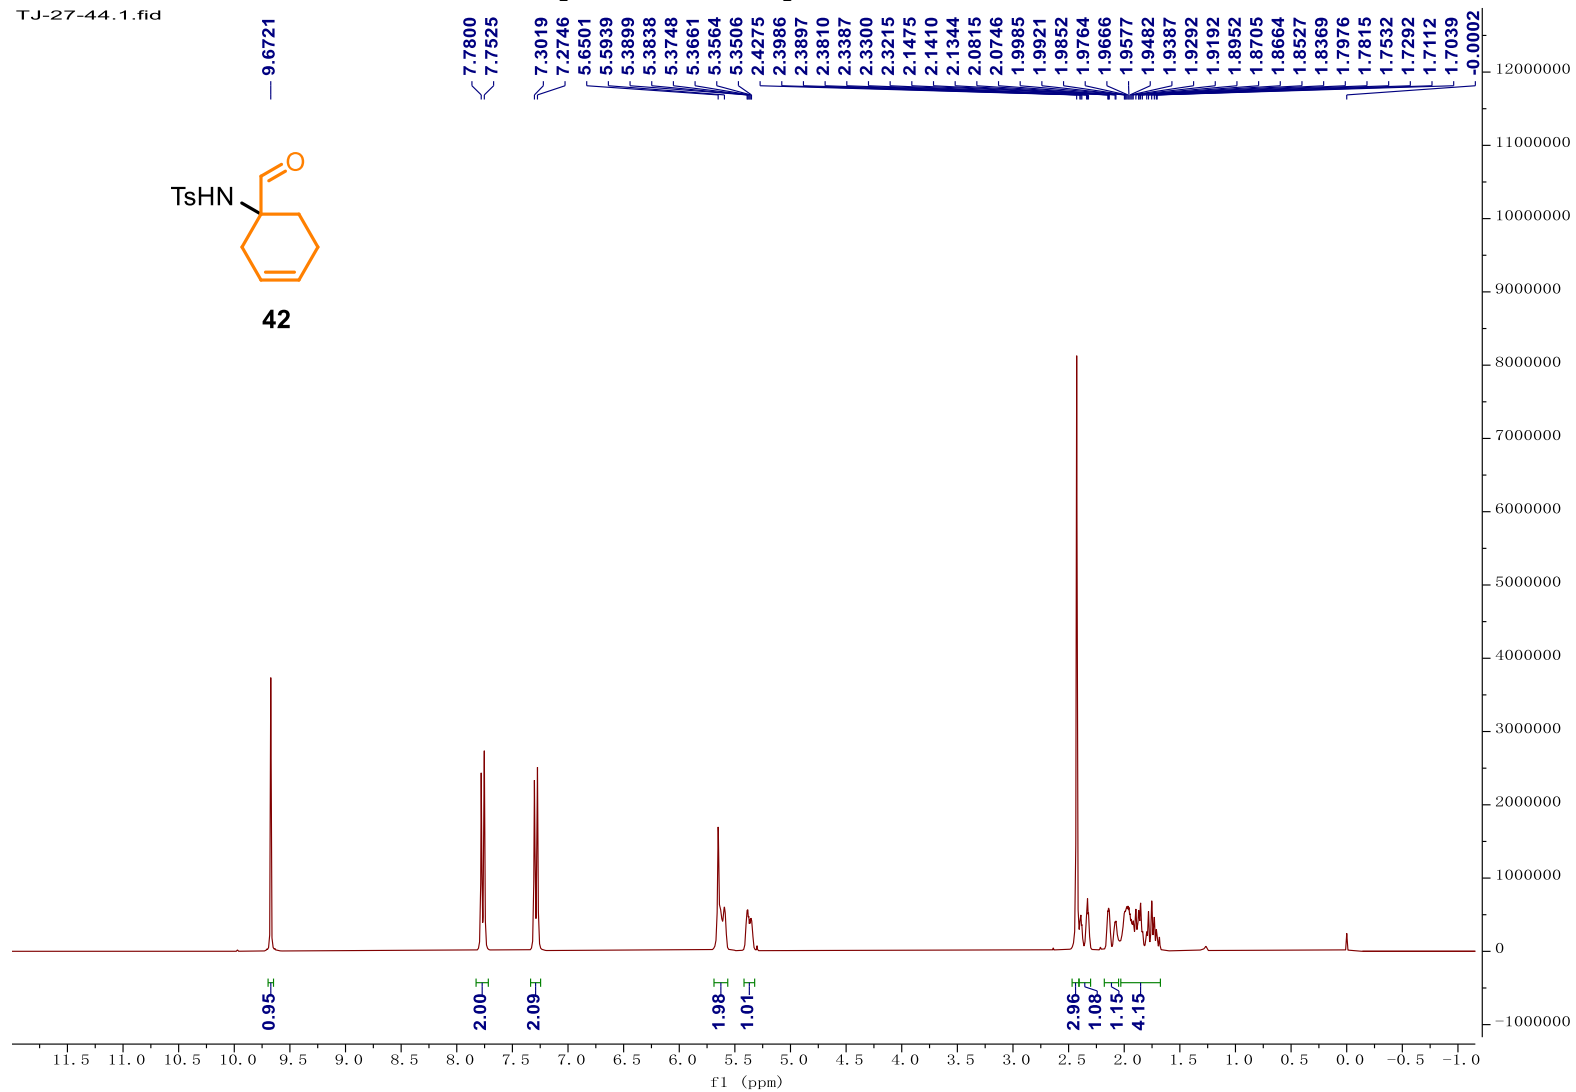

<sup>13</sup>C NMR spectrum of compound 42 (75 MHz, CDCl<sub>3</sub>)

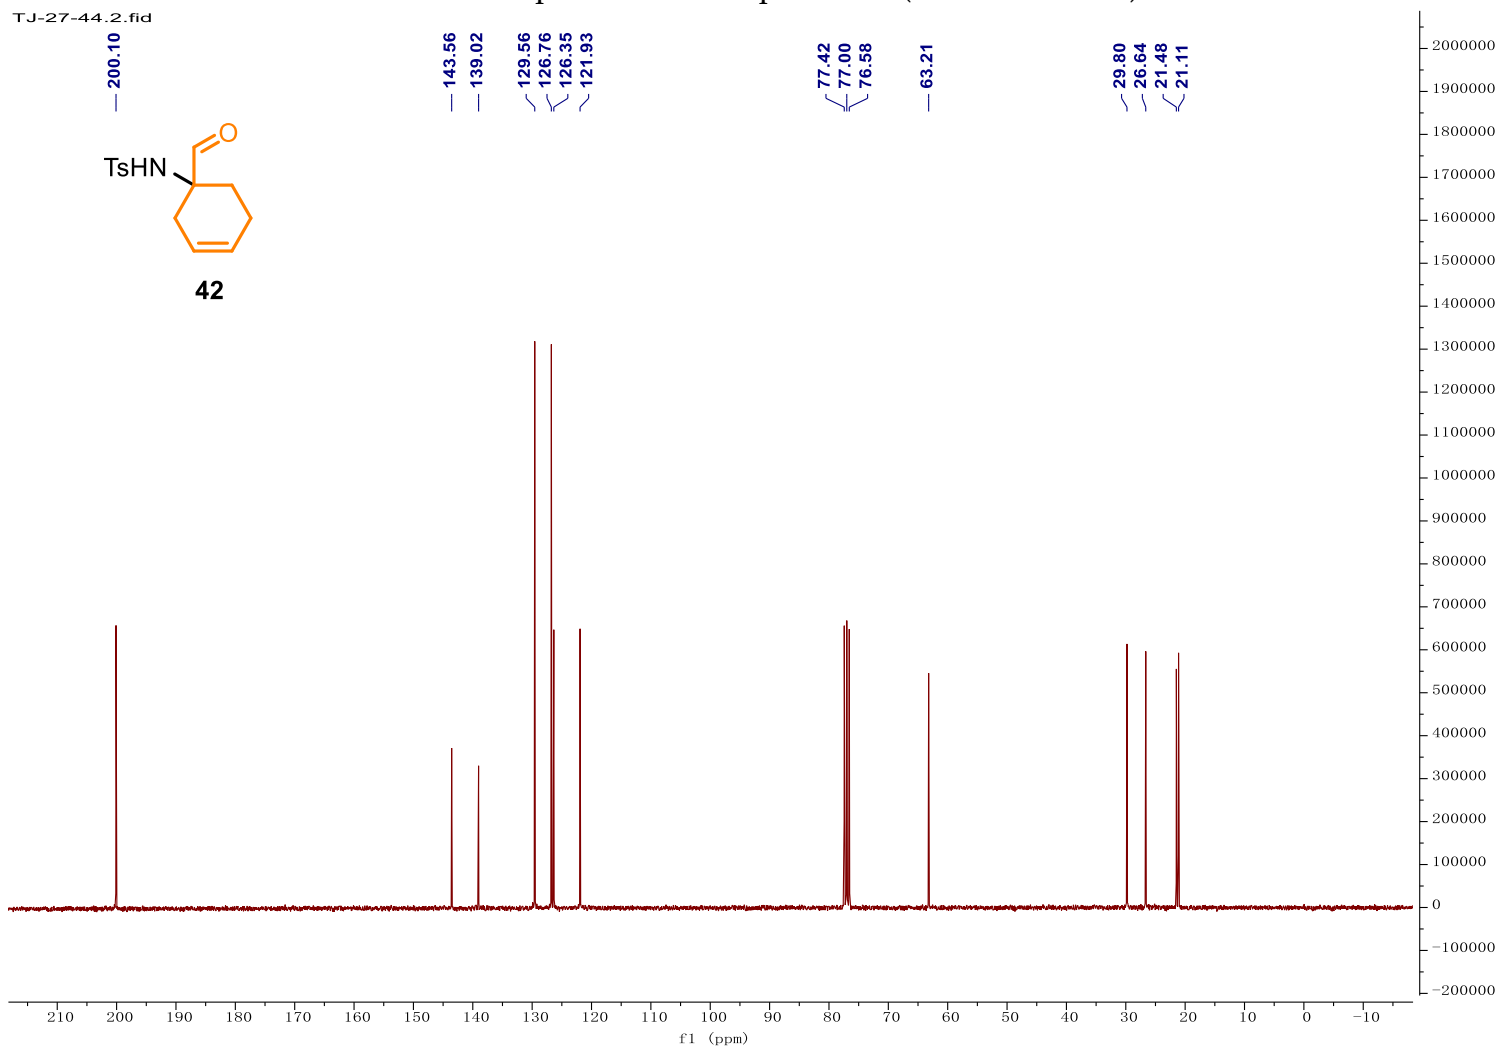

TJ-28-1.7.fid

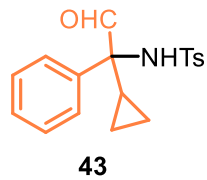

### <sup>1</sup>H NMR spectrum of compound 43 (300 MHz, CDCl<sub>3</sub>)

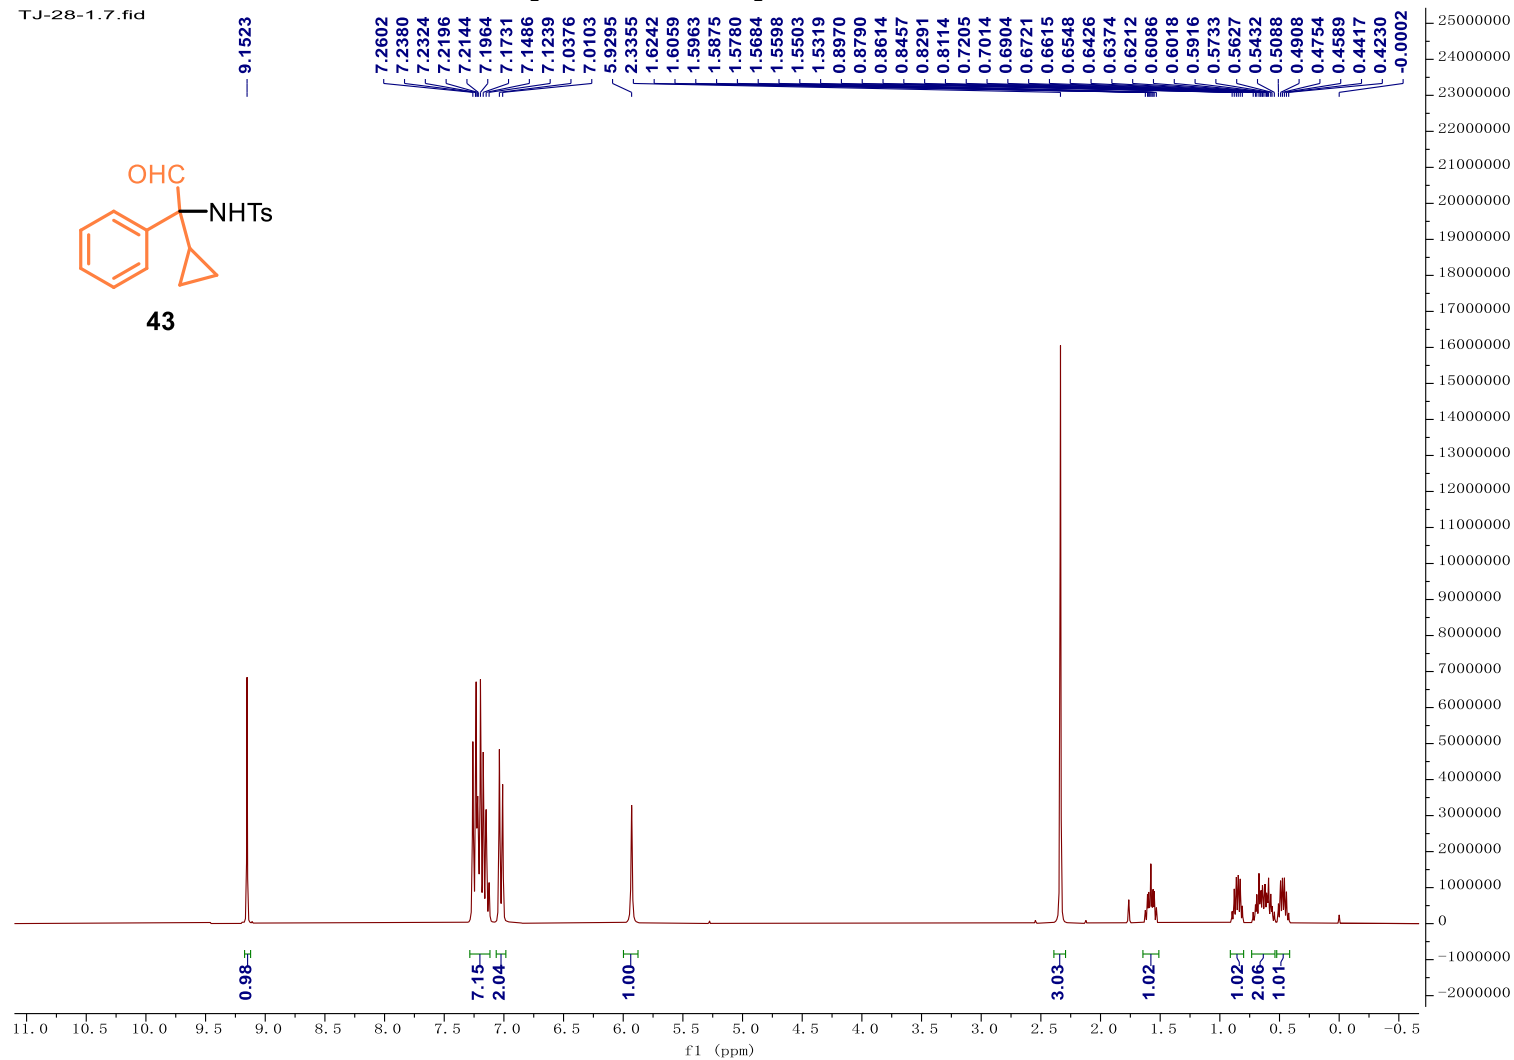

<sup>13</sup>C NMR spectrum of compound 43 (75 MHz, CDCl<sub>3</sub>)

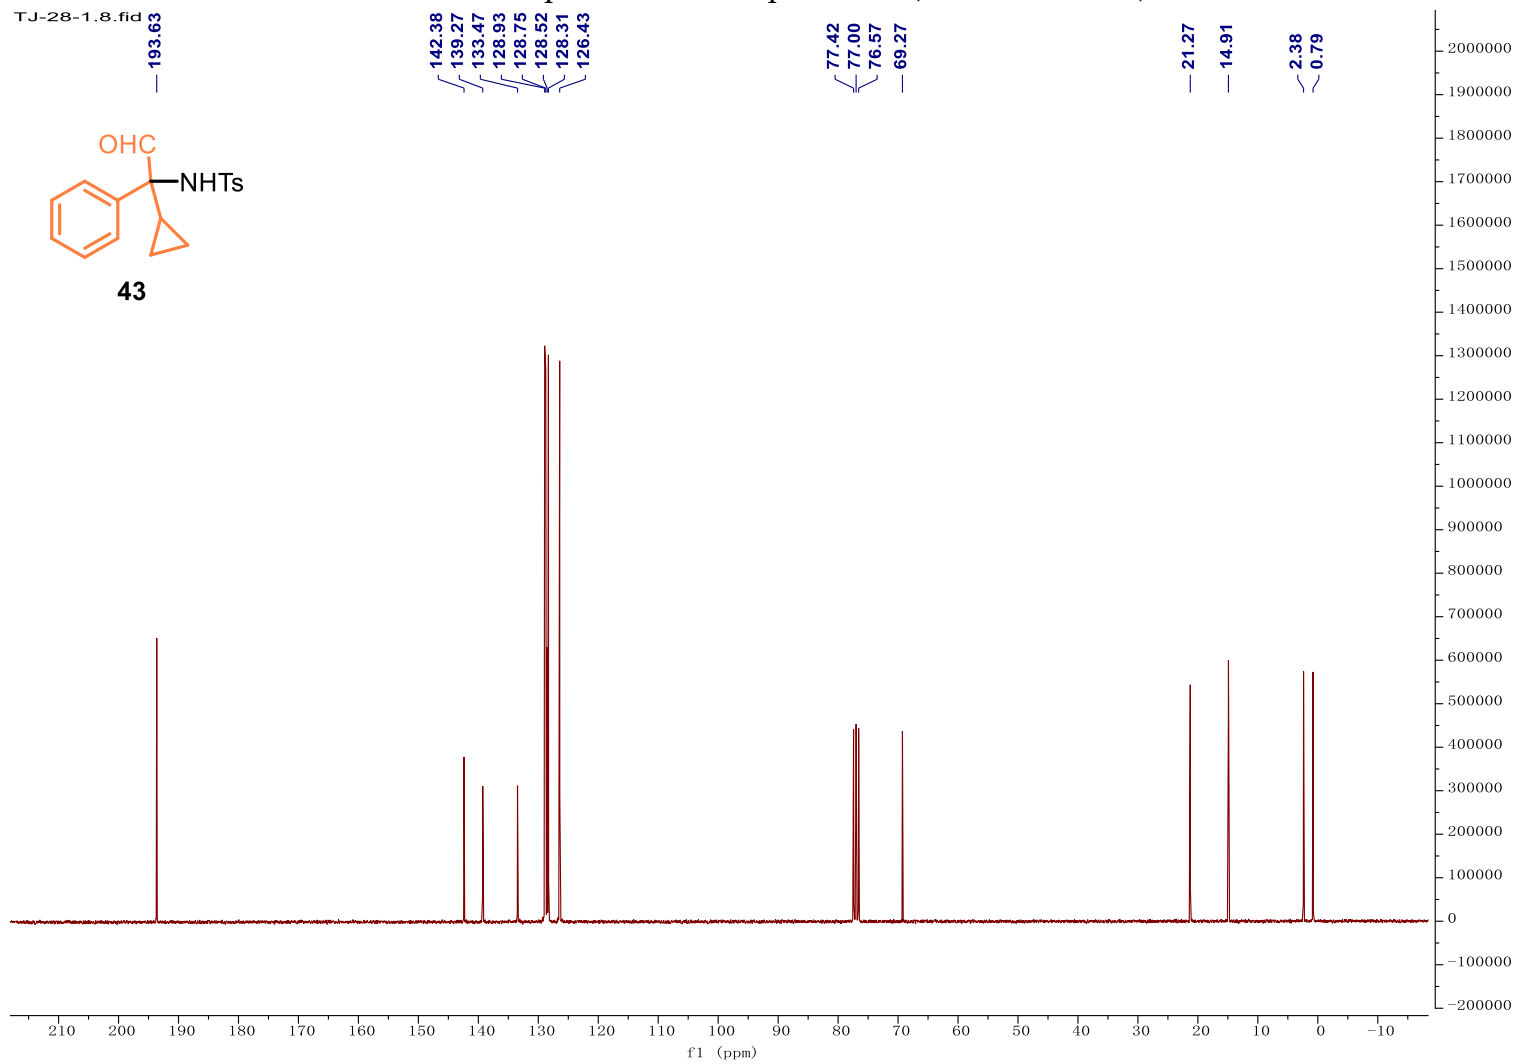

<sup>1</sup>H NMR spectrum of compound **44** (300 MHz, CDCl<sub>3</sub>)

TJ-28-45.1.fid

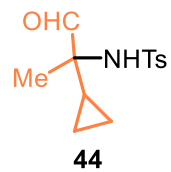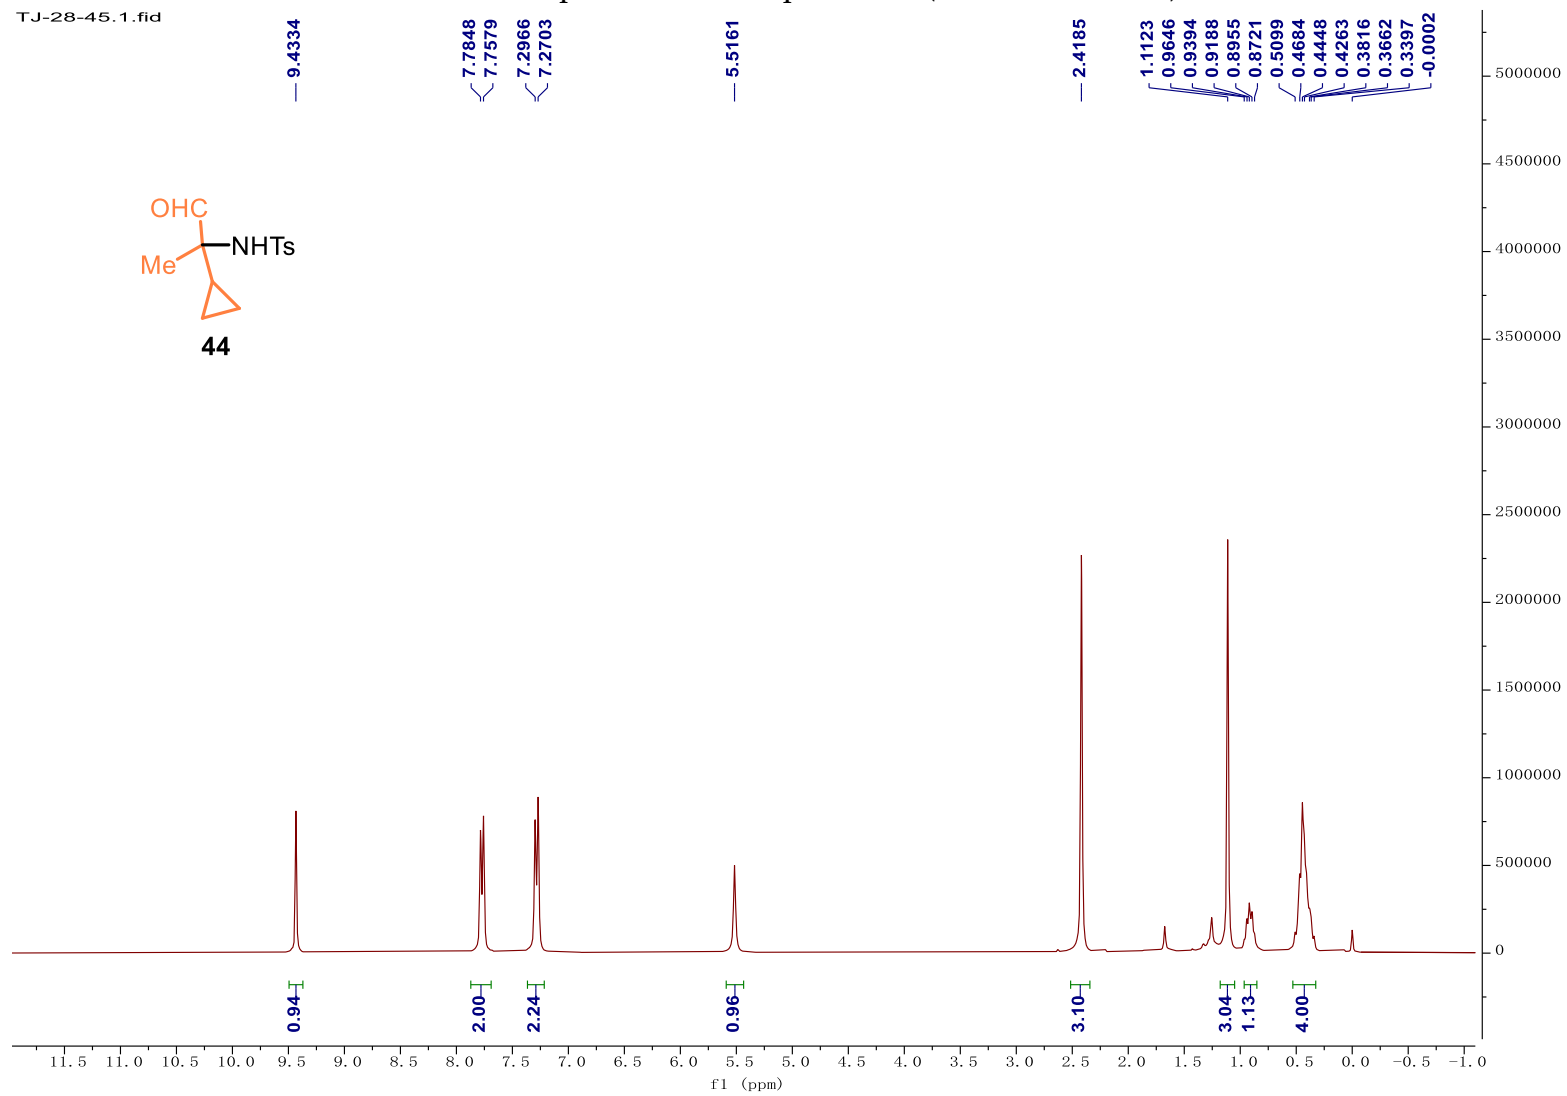

<sup>13</sup>C NMR spectrum of compound **44** (75 MHz, CDCl<sub>3</sub>)

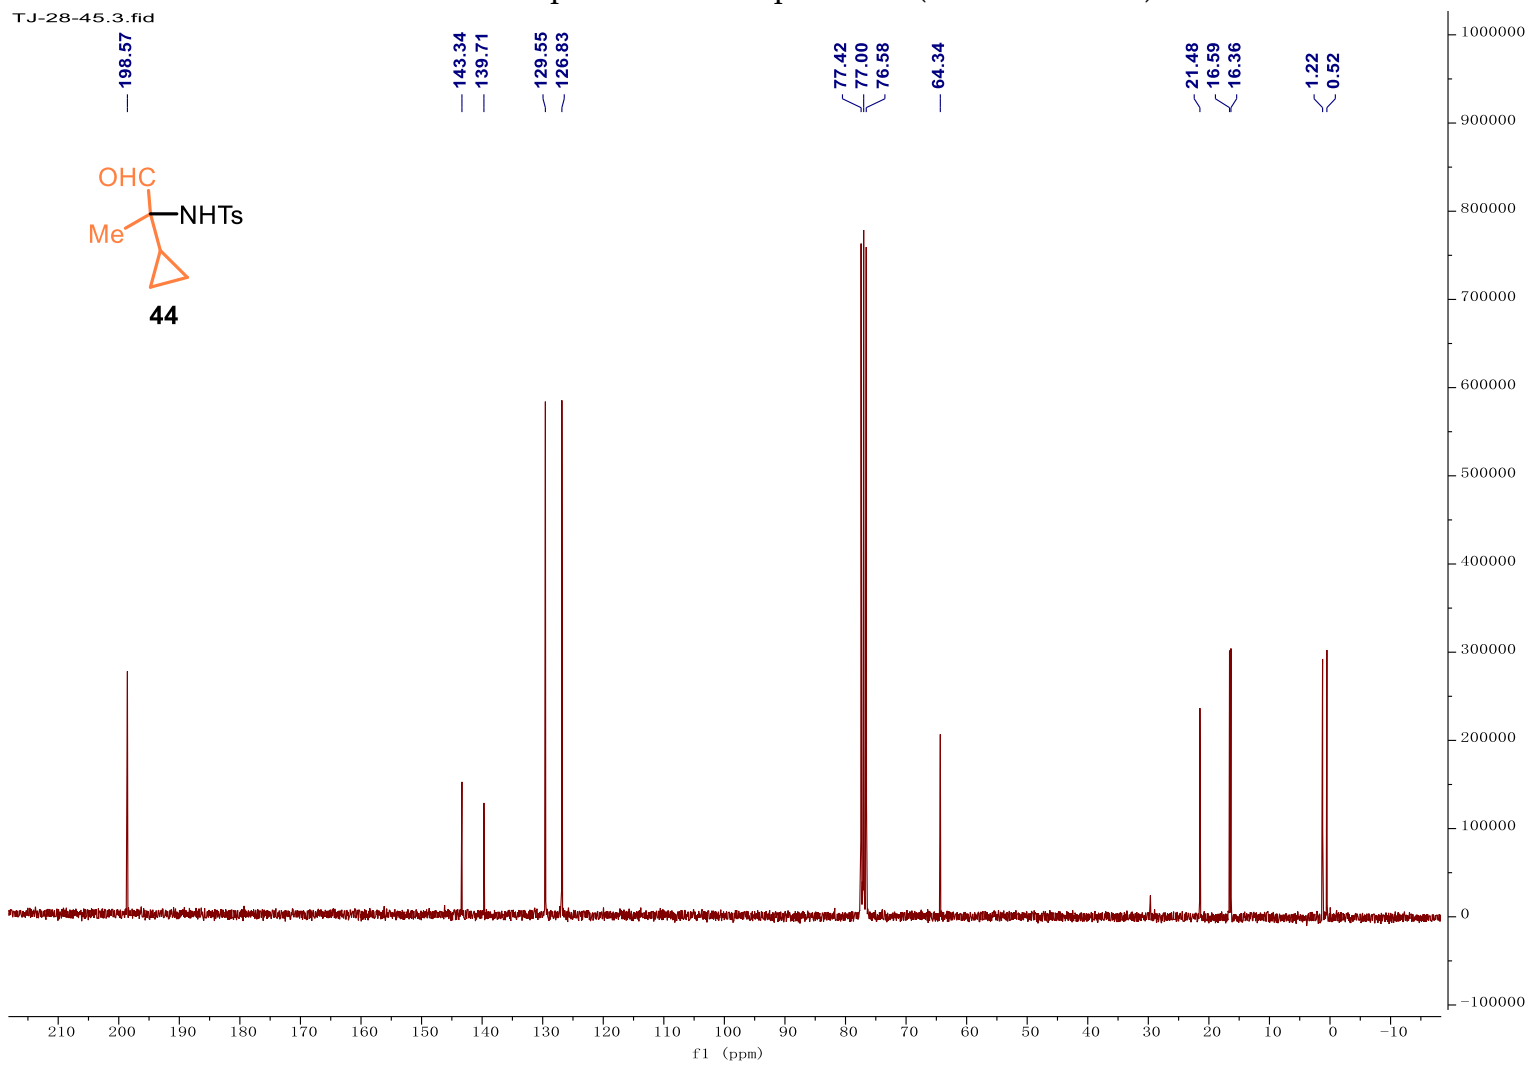

<sup>1</sup>H NMR spectrum of compound **45** (300 MHz, CDCl<sub>3</sub>)

TJ-29-9.9.fid

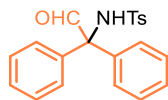

**45**

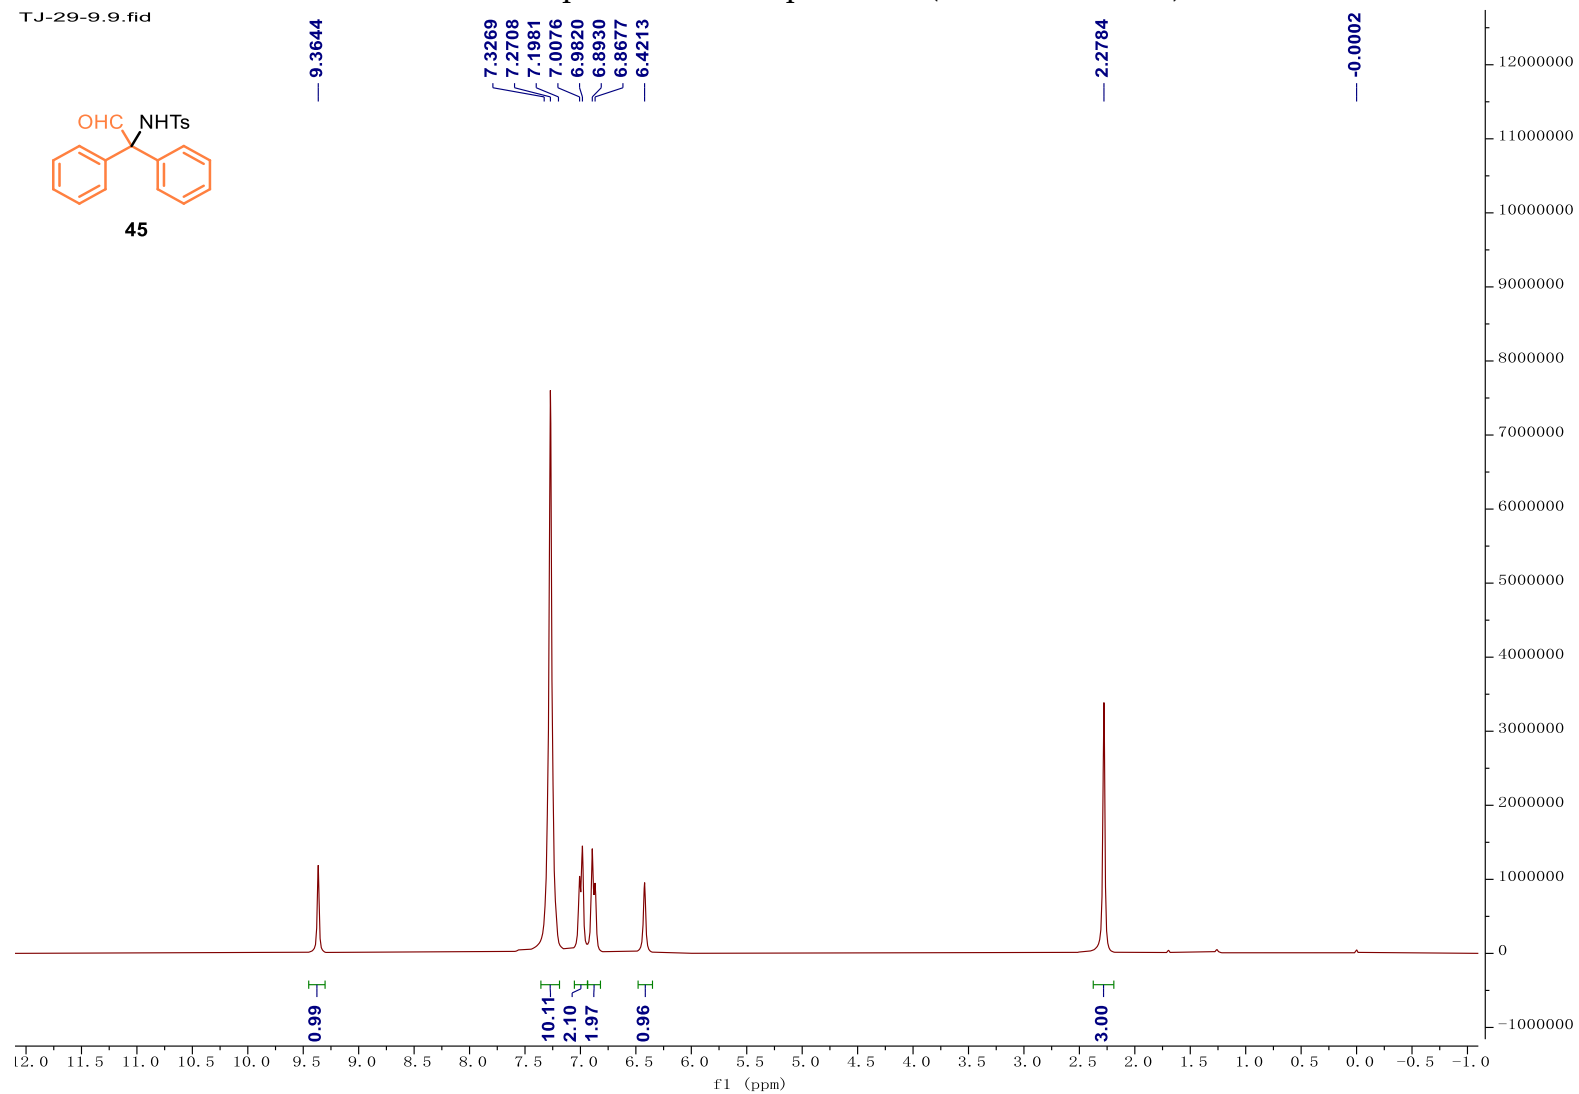

S145

<sup>13</sup>C NMR spectrum of compound 45 (75 MHz, CDCl<sub>3</sub>)

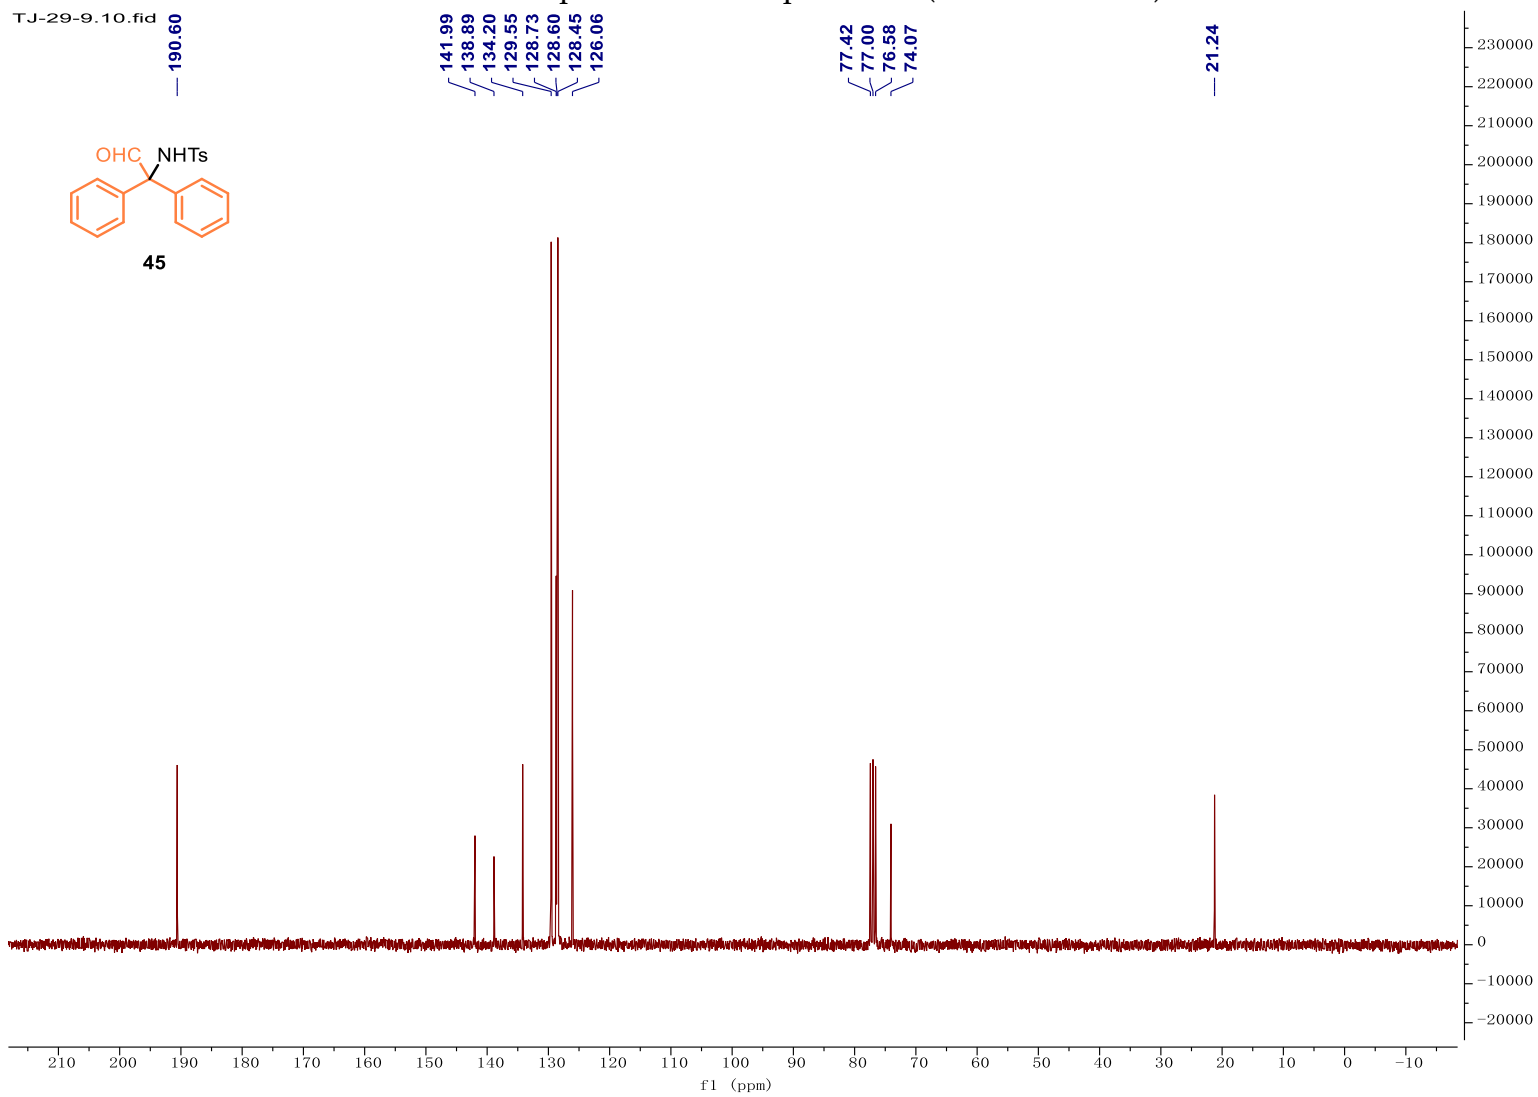

<sup>1</sup>H NMR spectrum of compound 3 from gram scale reaction (300 MHz, CDCl<sub>3</sub>)

TJ-27-35.1.fid

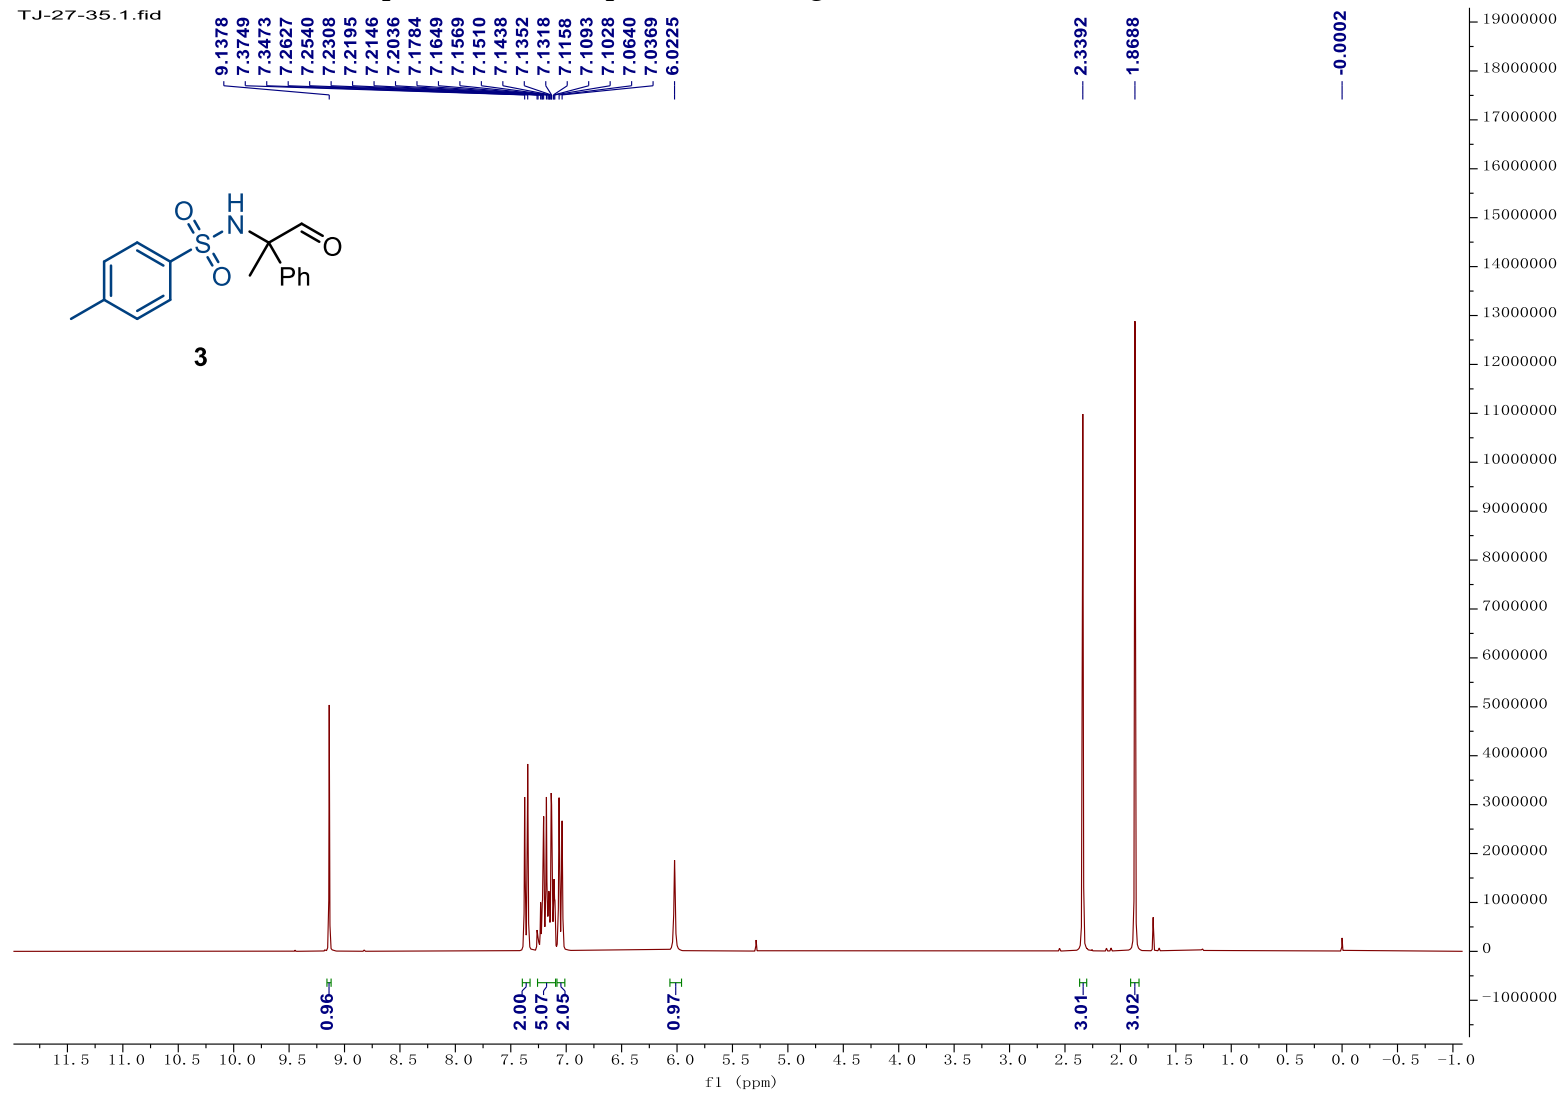

<sup>13</sup>C NMR spectrum of compound 3 from gram scale reaction (75 MHz, CDCl<sub>3</sub>)

TJ-27-35.2.f1

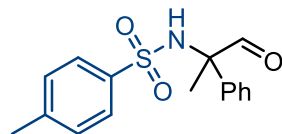

3

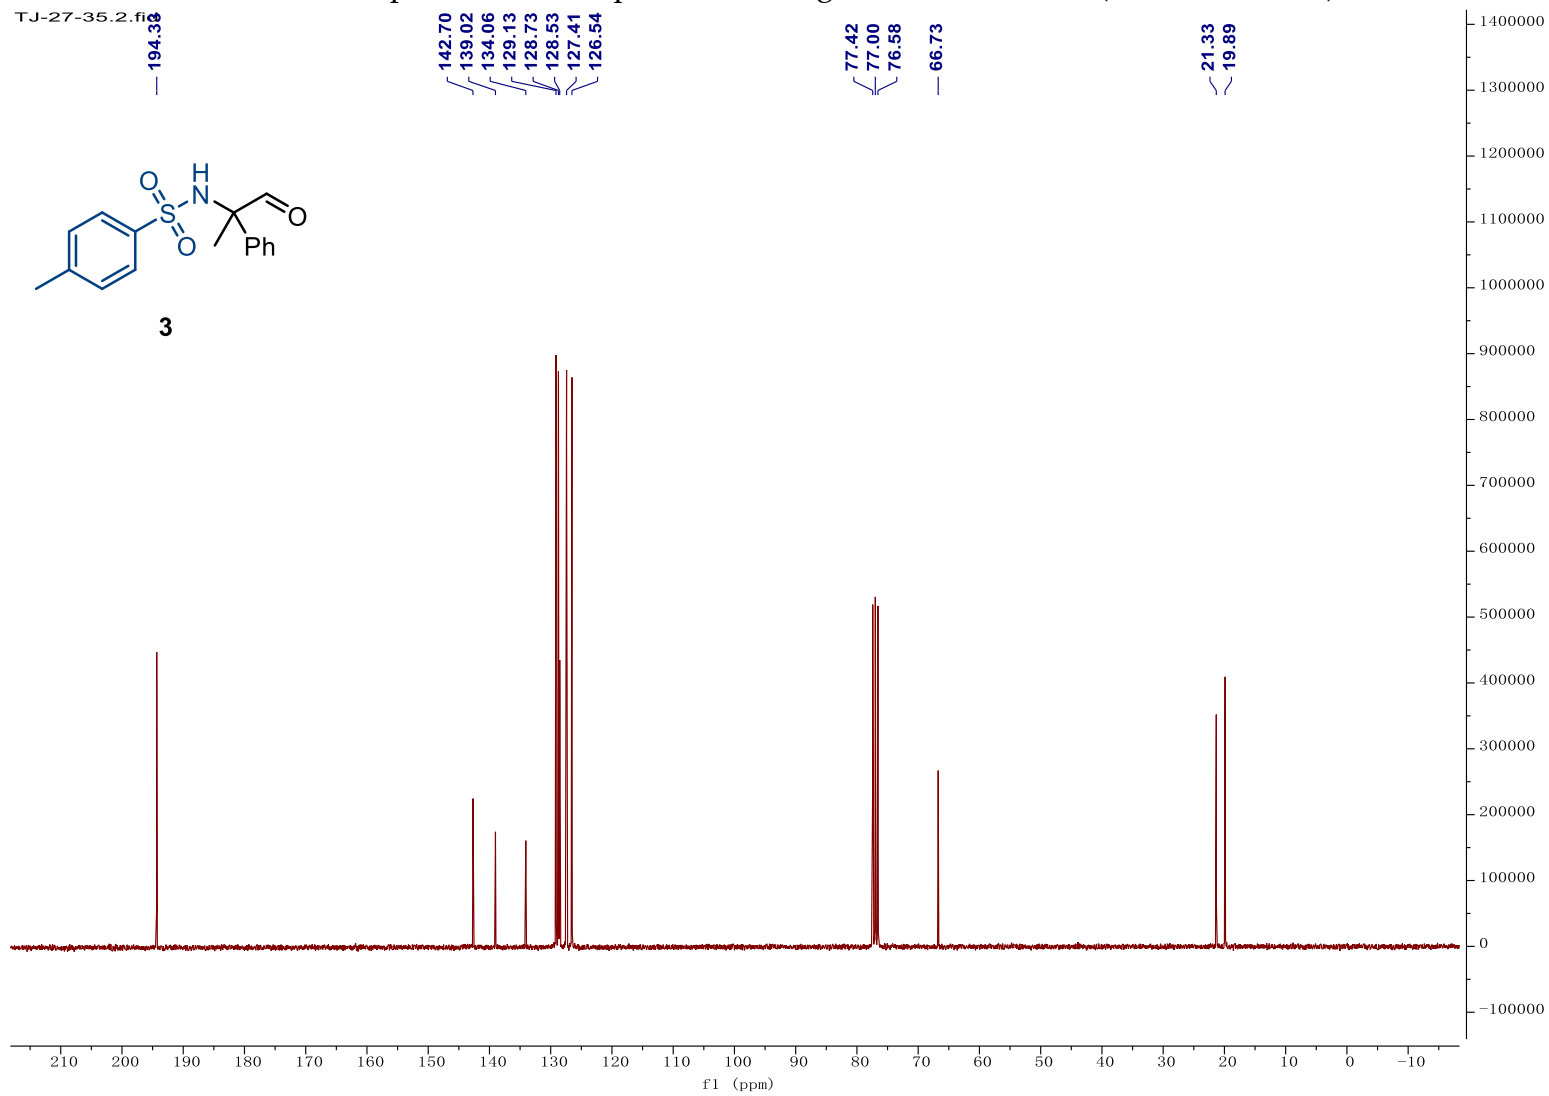

<sup>1</sup>H NMR spectrum of compound **39** from gram scale reaction (300 MHz, CDCl<sub>3</sub>)

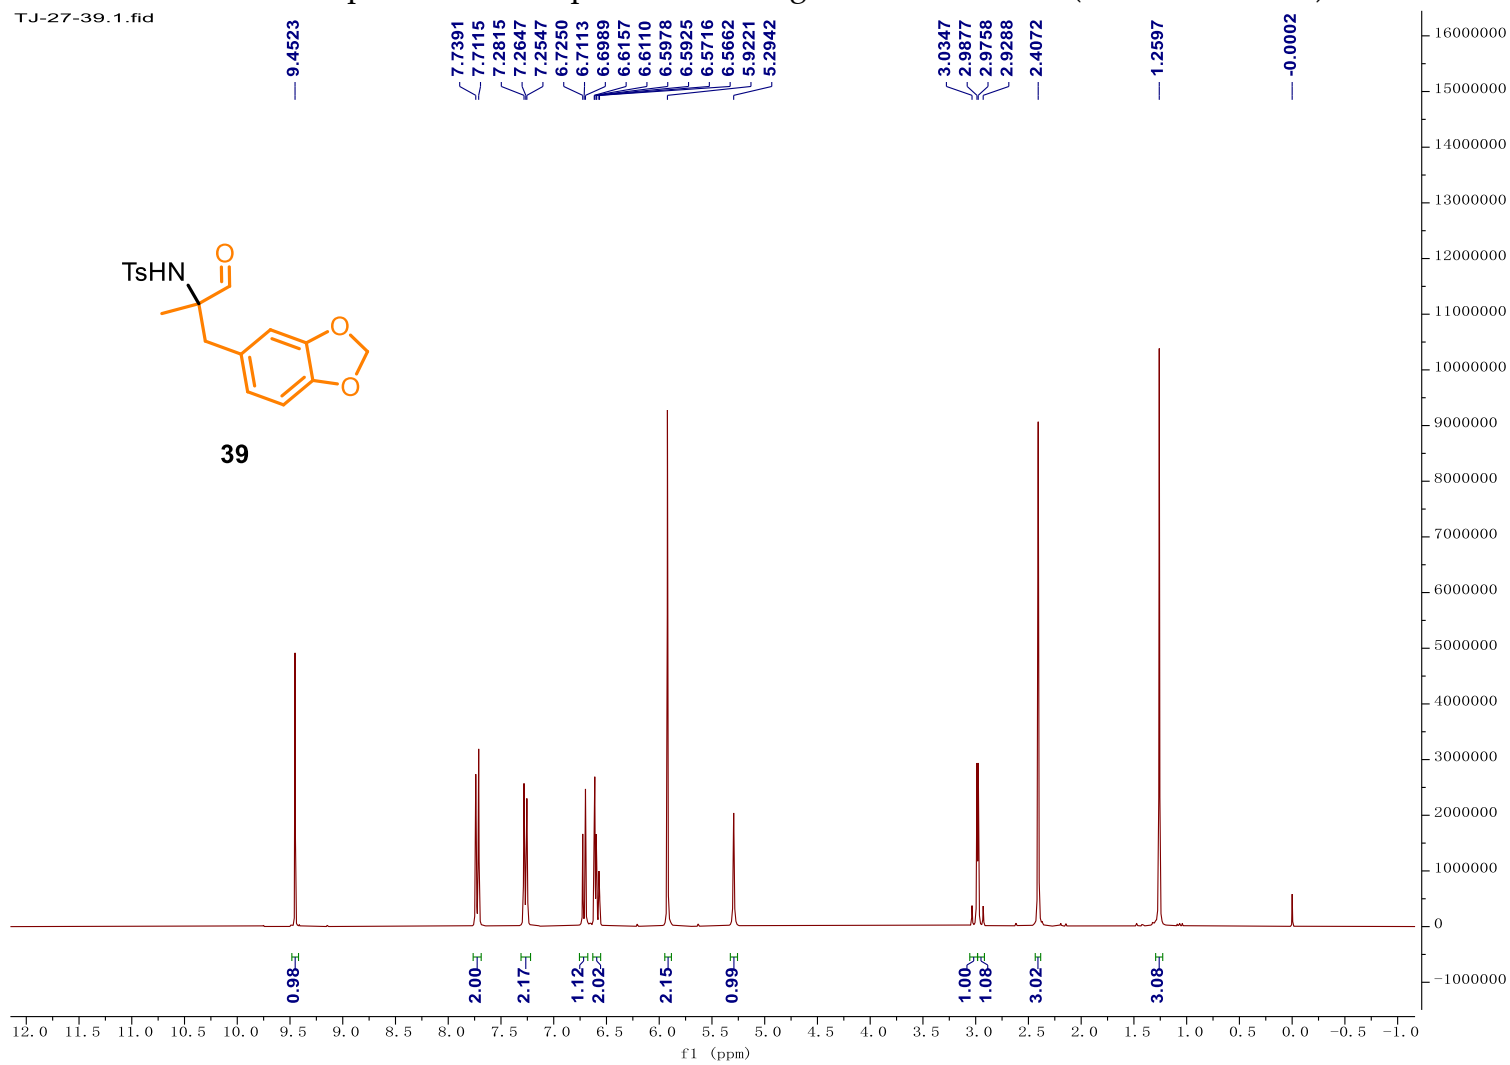

<sup>13</sup>C NMR spectrum of compound **39** from gram scale reaction (75 MHz, CDCl<sub>3</sub>)

TJ-27-39.2.fid

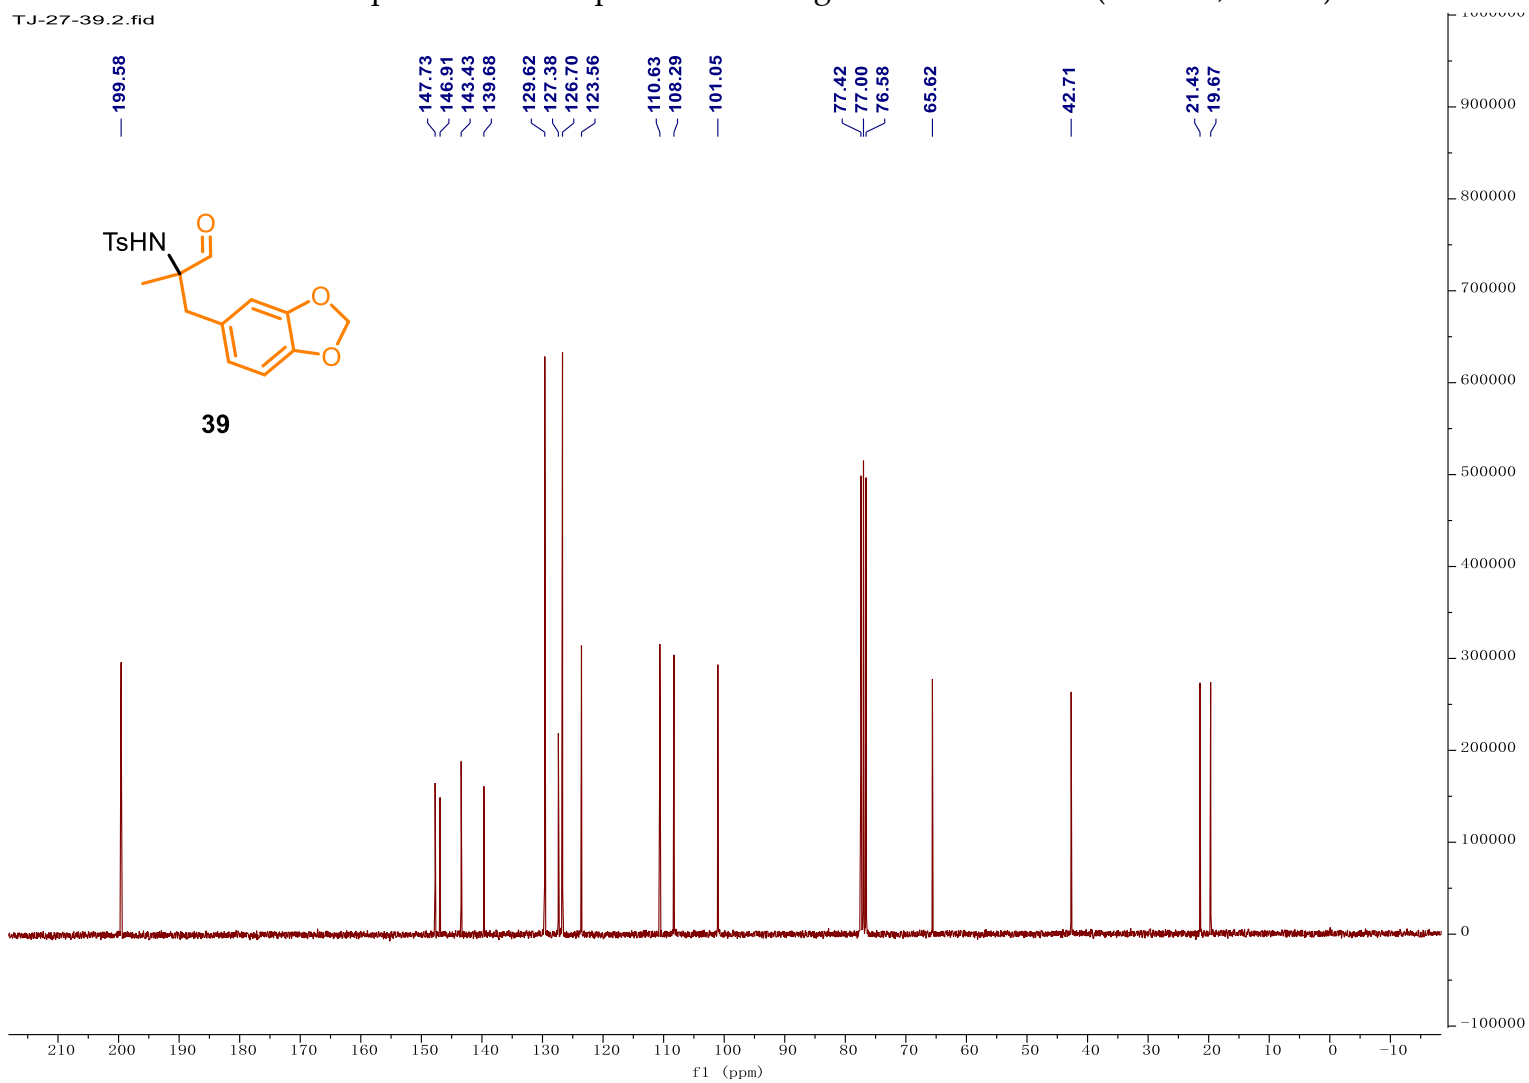

<sup>1</sup>H NMR spectrum of compound 41 from gram scale reaction (300 MHz, CDCl<sub>3</sub>)

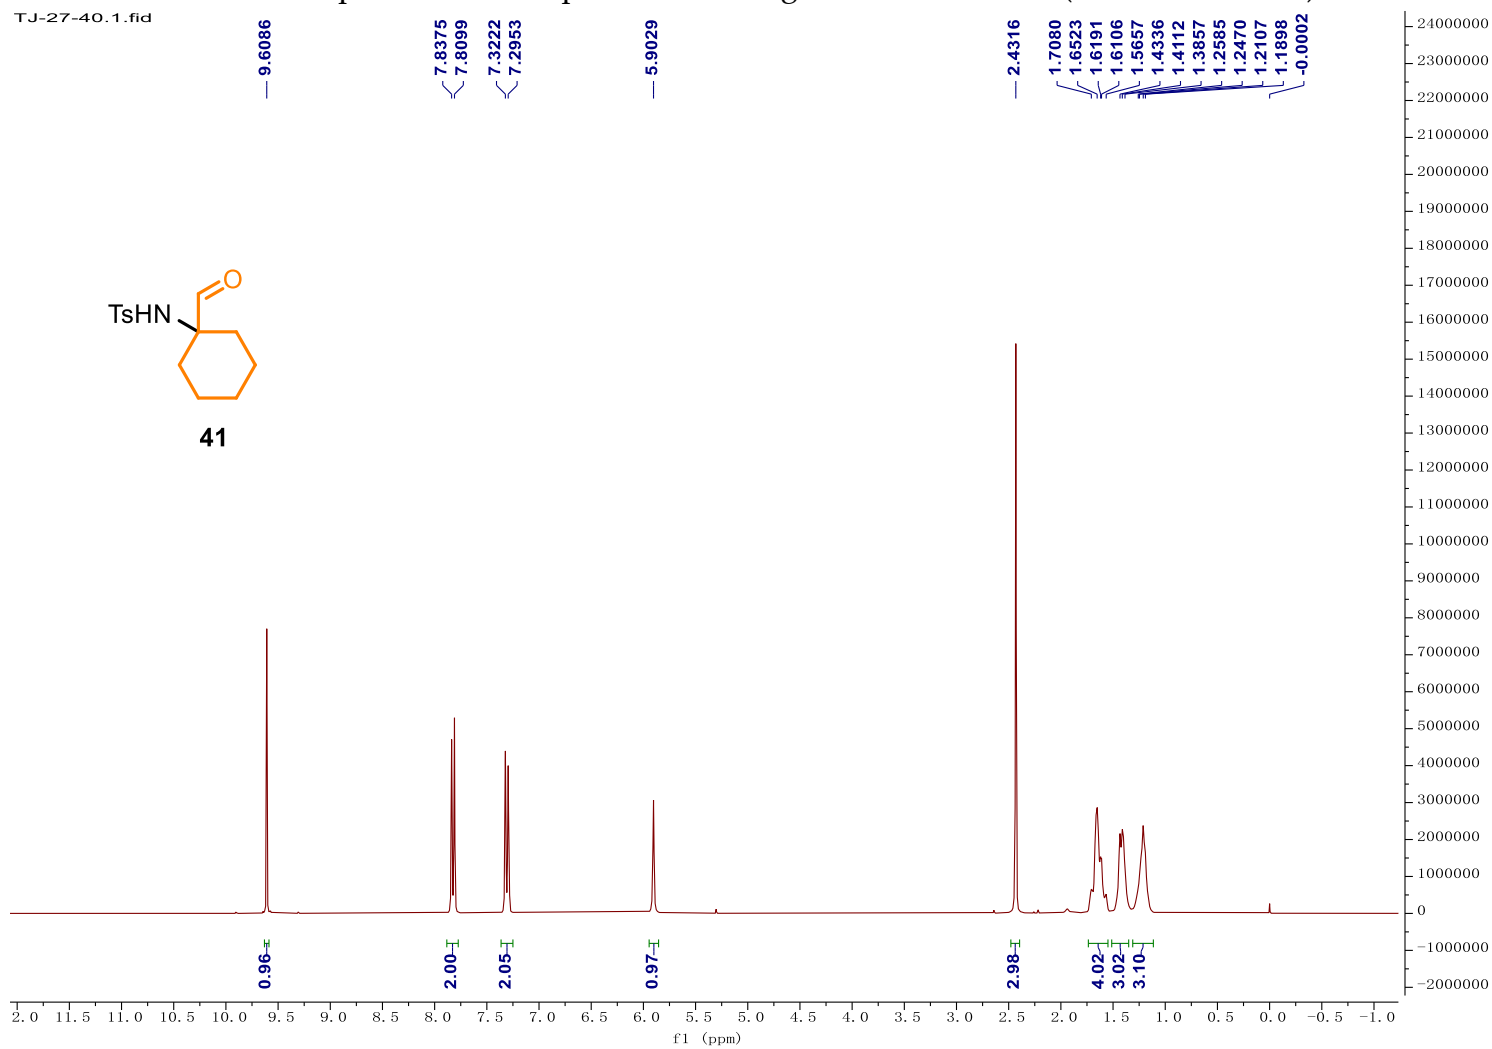

<sup>13</sup>C NMR spectrum of compound **41** from gram scale reaction (75 MHz, CDCl<sub>3</sub>)

TJ-27-40.2.fid

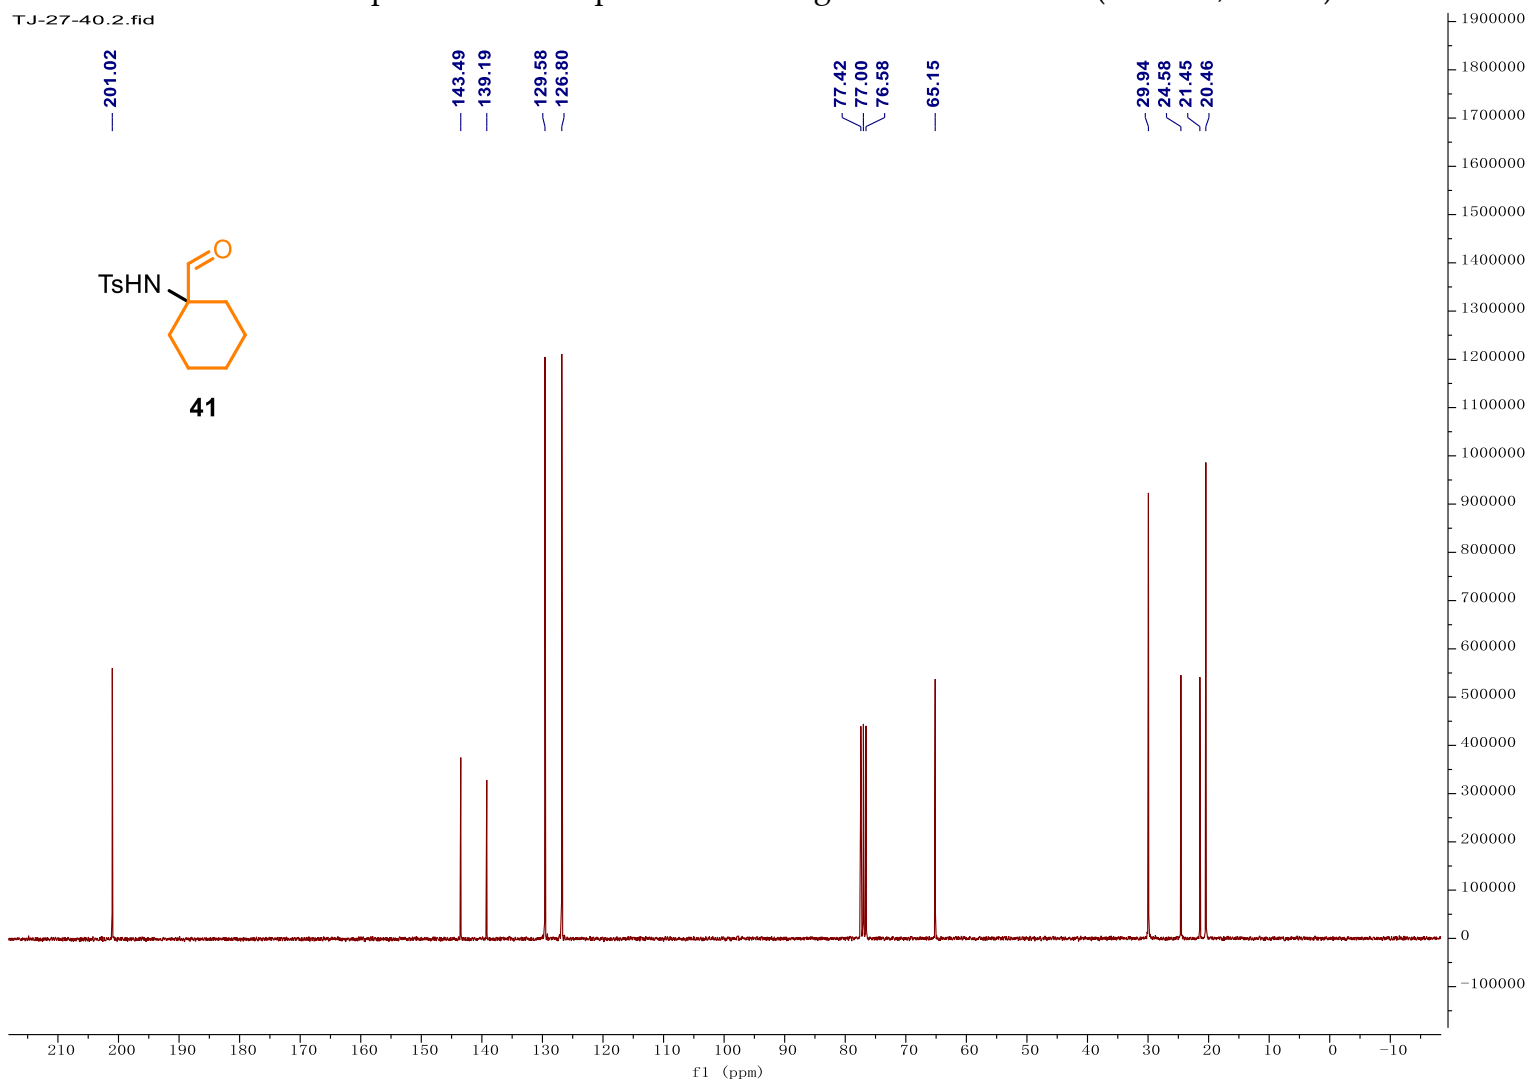

<sup>1</sup>H NMR spectrum of compound **46** (300 MHz, CDCl<sub>3</sub>)

TJ-28-2.7.fid

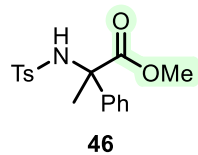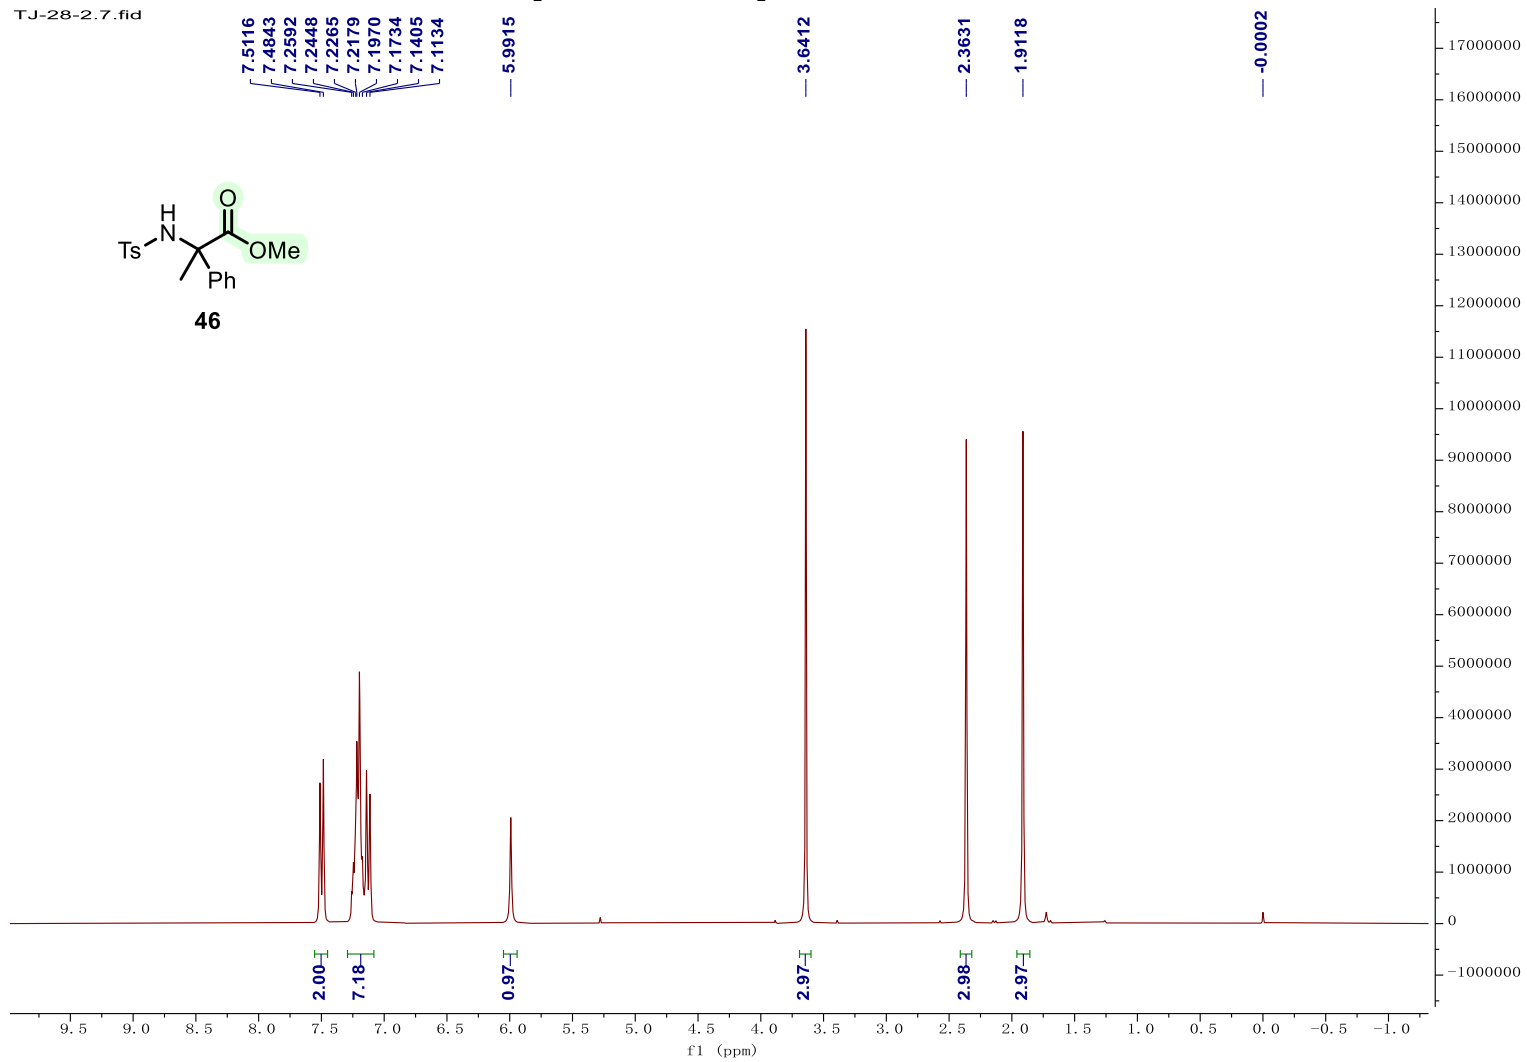

TJ-28-2.8.fid

<sup>13</sup>C NMR spectrum of compound **46** (75 MHz, CDCl<sub>3</sub>)

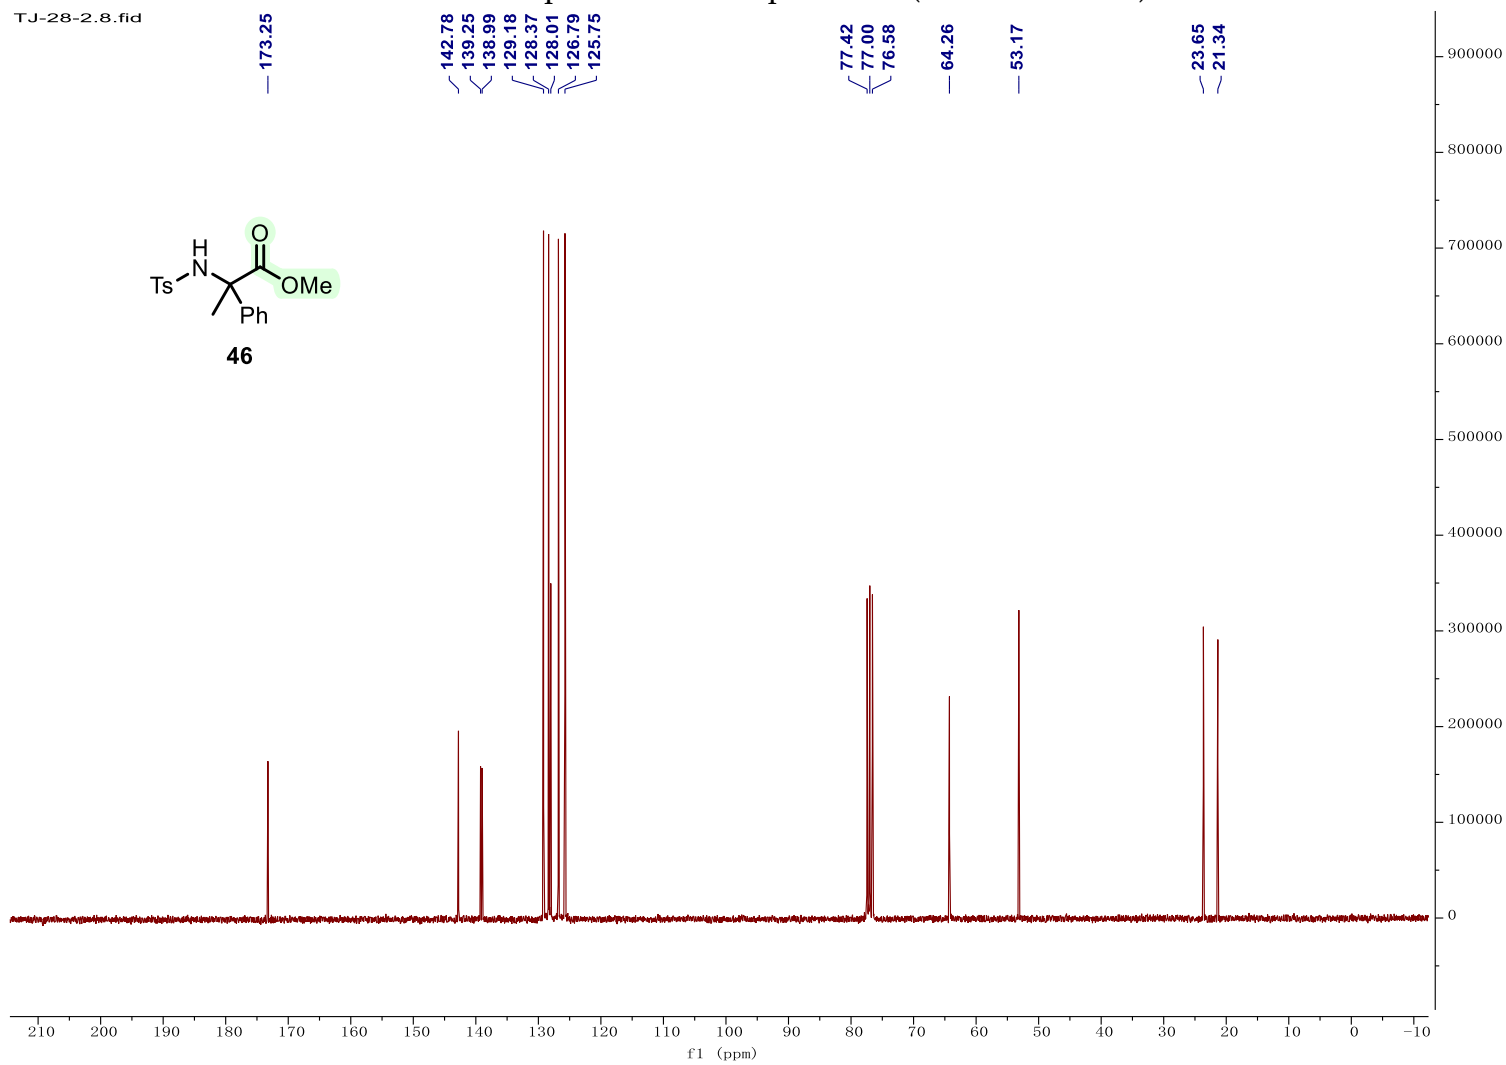

<sup>1</sup>H NMR spectrum of compound 47 (300 MHz, CDCl<sub>3</sub>)

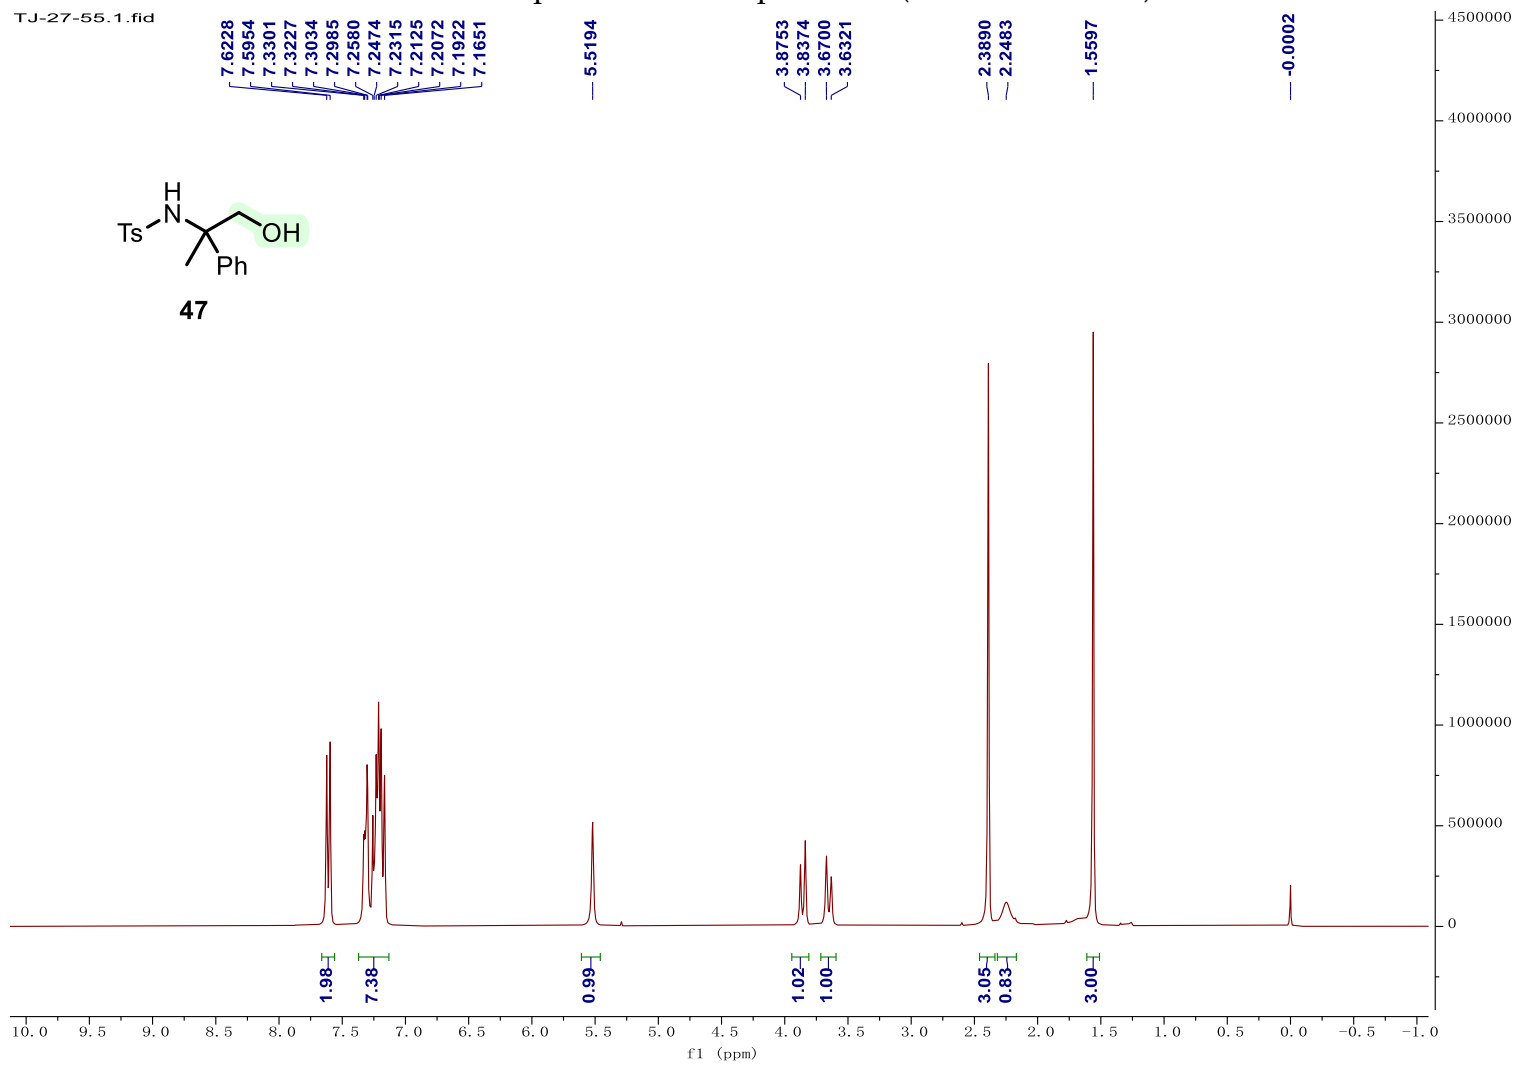

<sup>13</sup>C NMR spectrum of compound 47 (75 MHz, CDCl<sub>3</sub>)

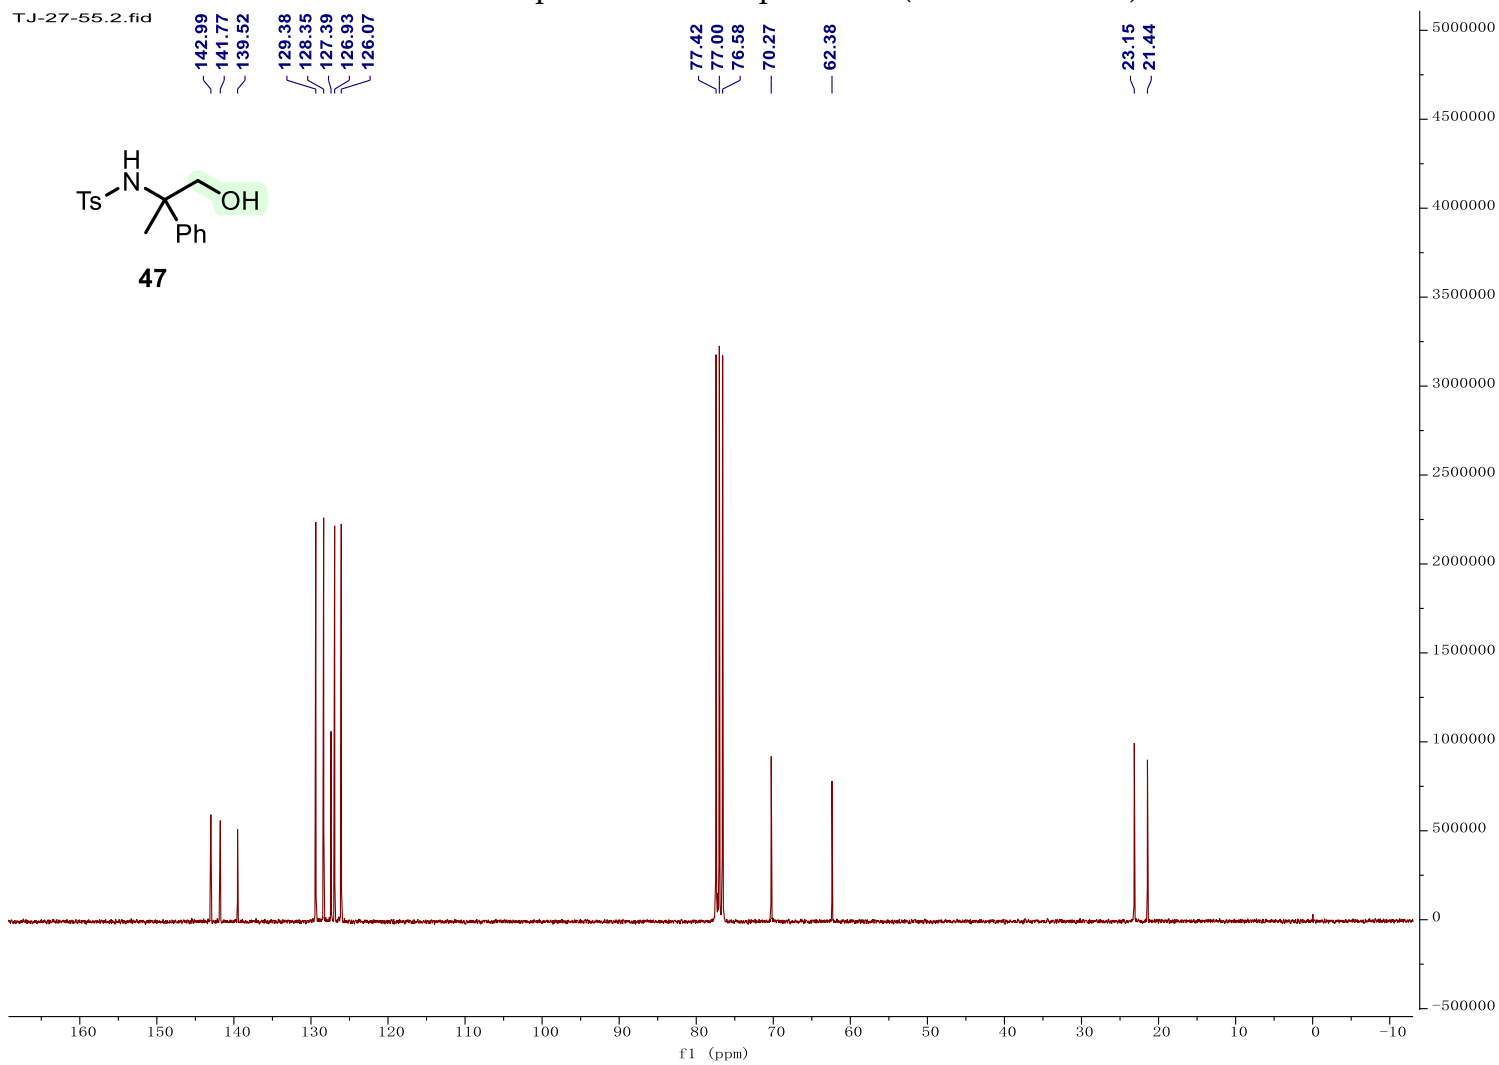

<sup>1</sup>H NMR spectrum of compound 48 (300 MHz, CDCl<sub>3</sub>)

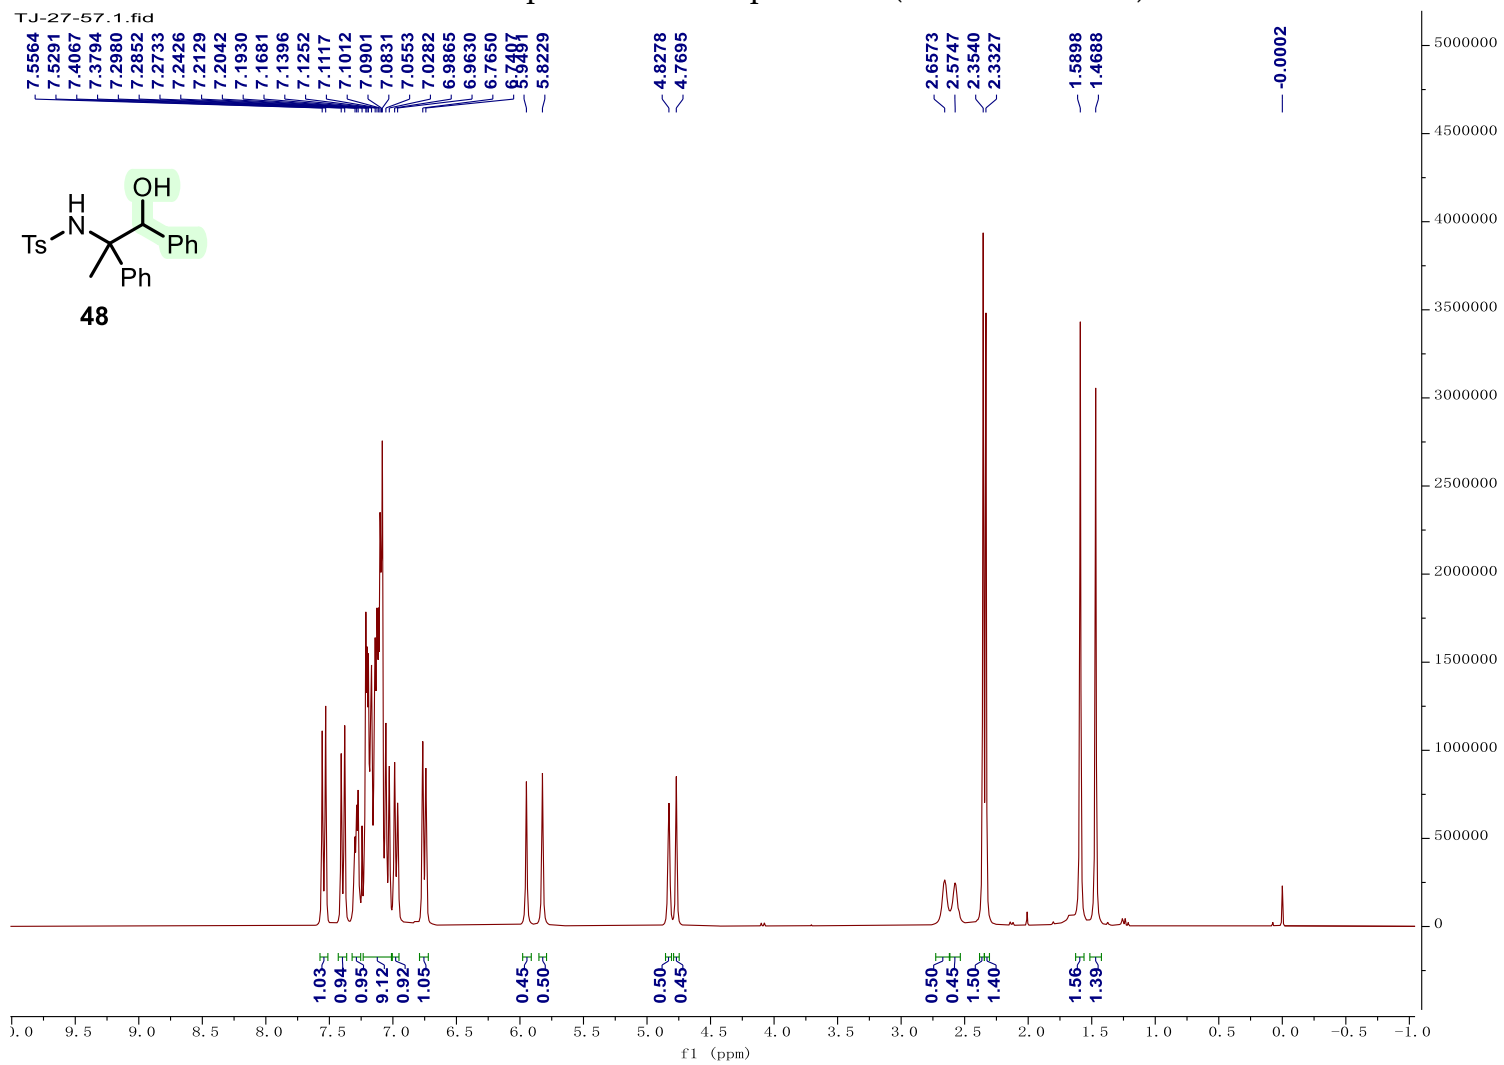

<sup>13</sup>C NMR spectrum of compound **48** (75 MHz, CDCl<sub>3</sub>)

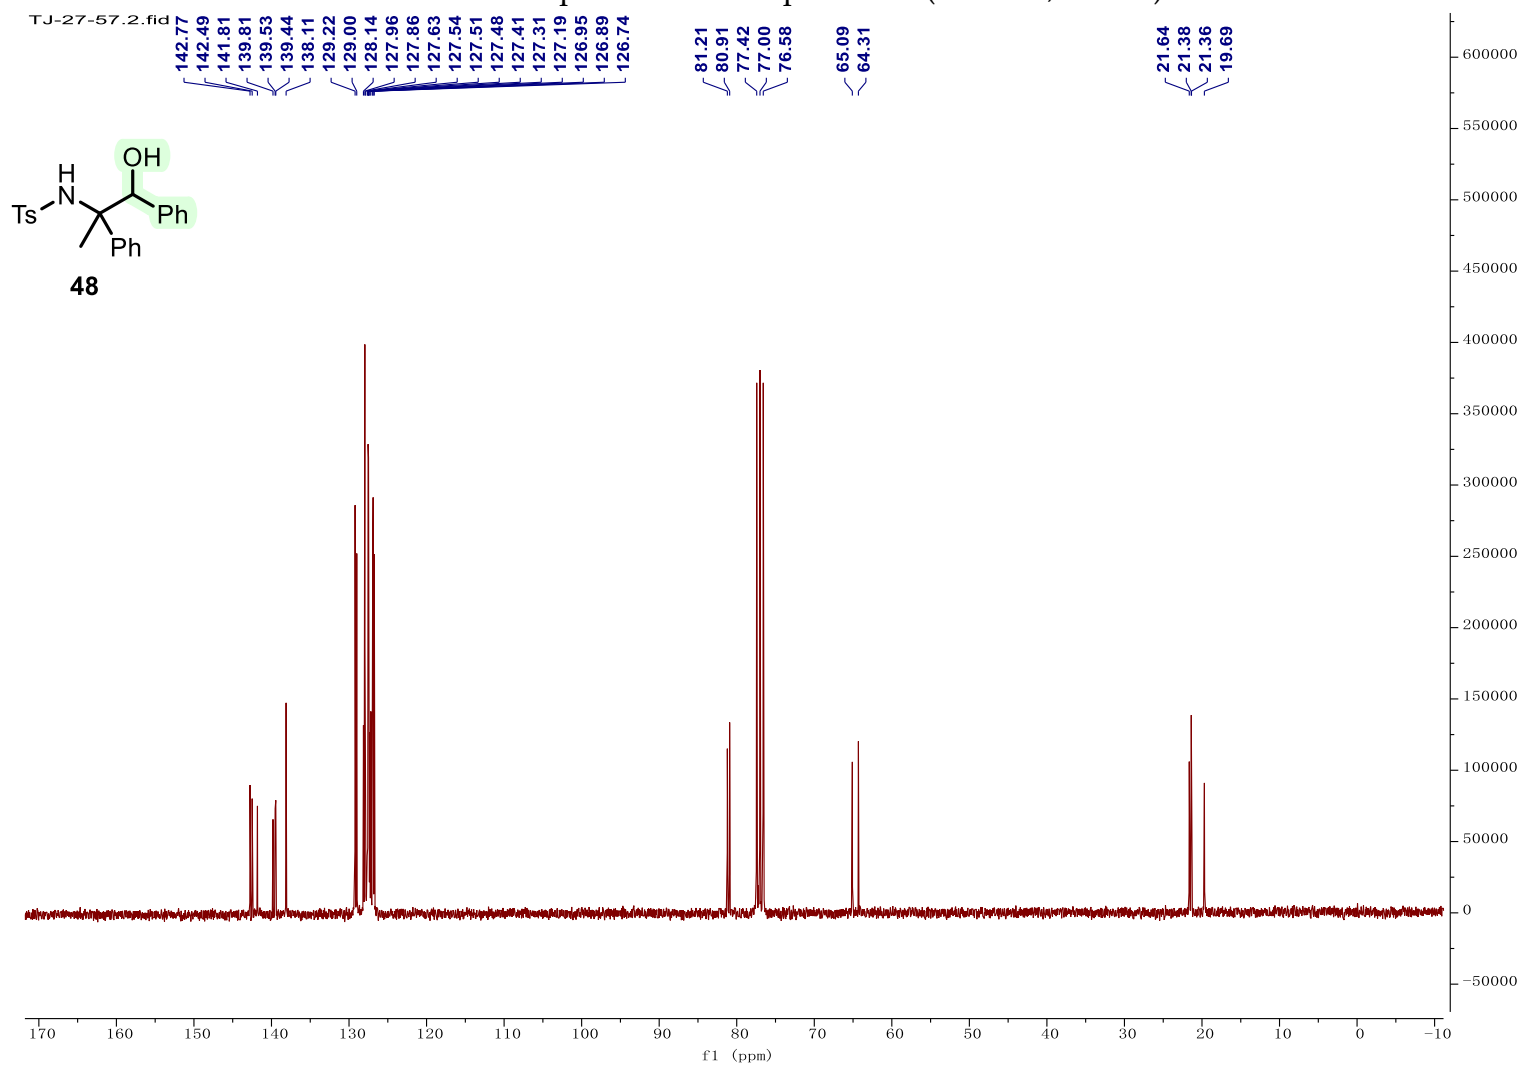

<sup>1</sup>H NMR spectrum of compound **49** (300 MHz, CDCl<sub>3</sub>)

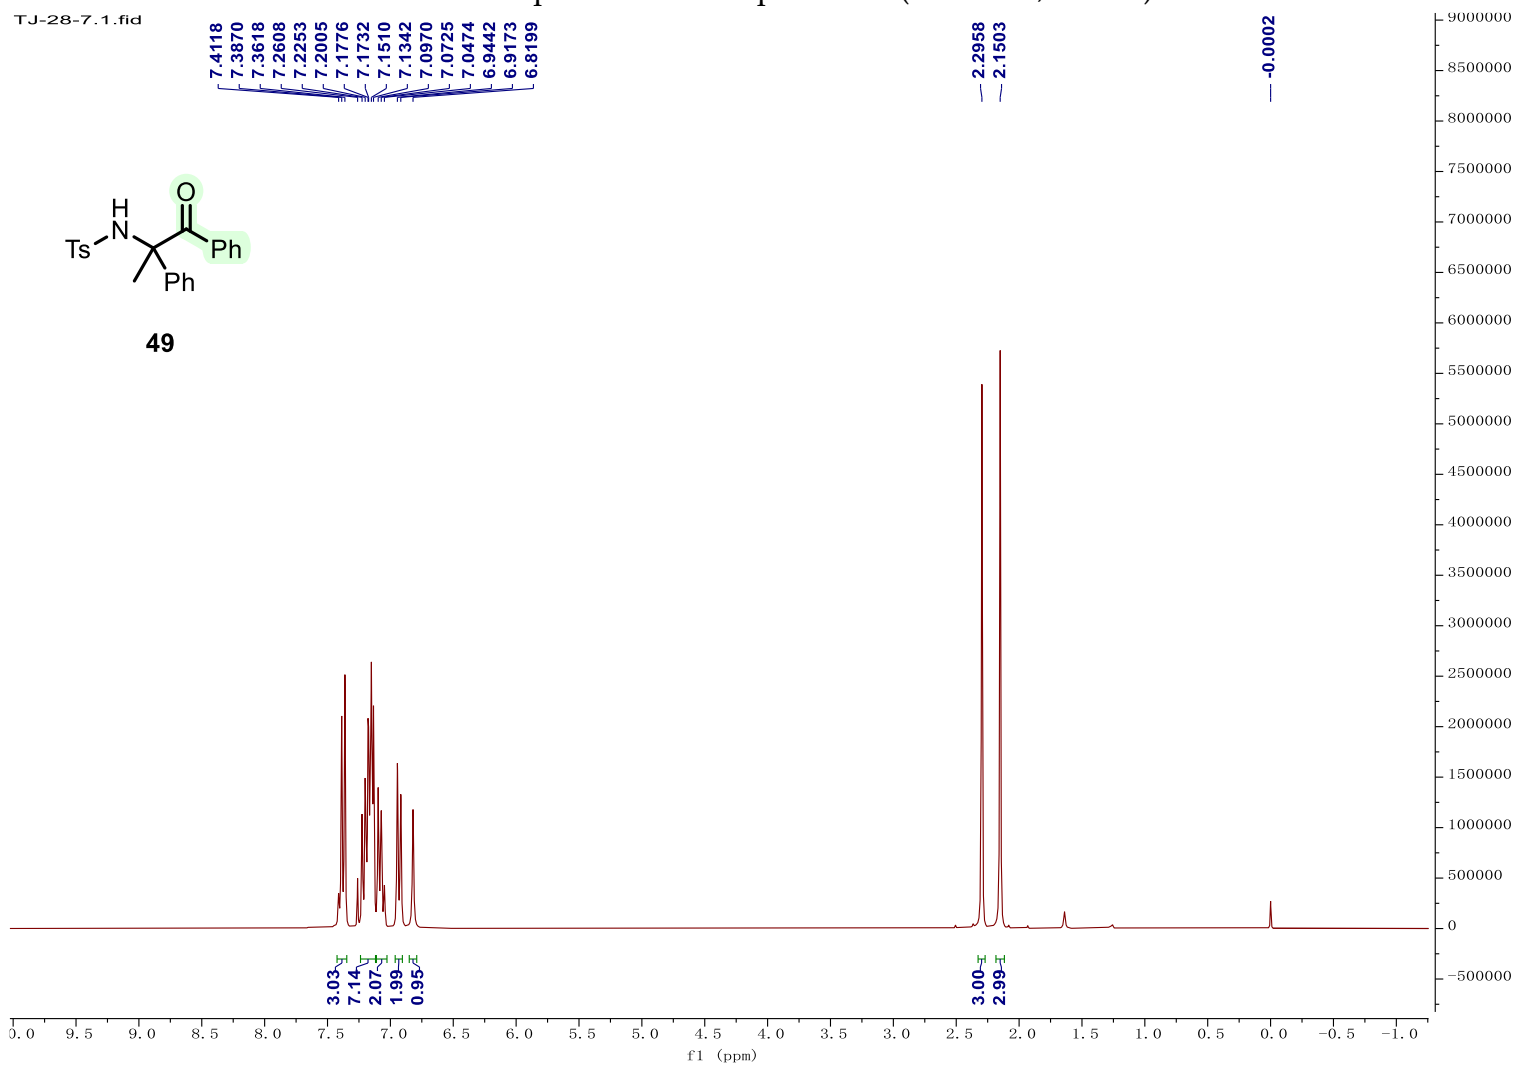

<sup>13</sup>C NMR spectrum of compound **49** (75 MHz, CDCl<sub>3</sub>)

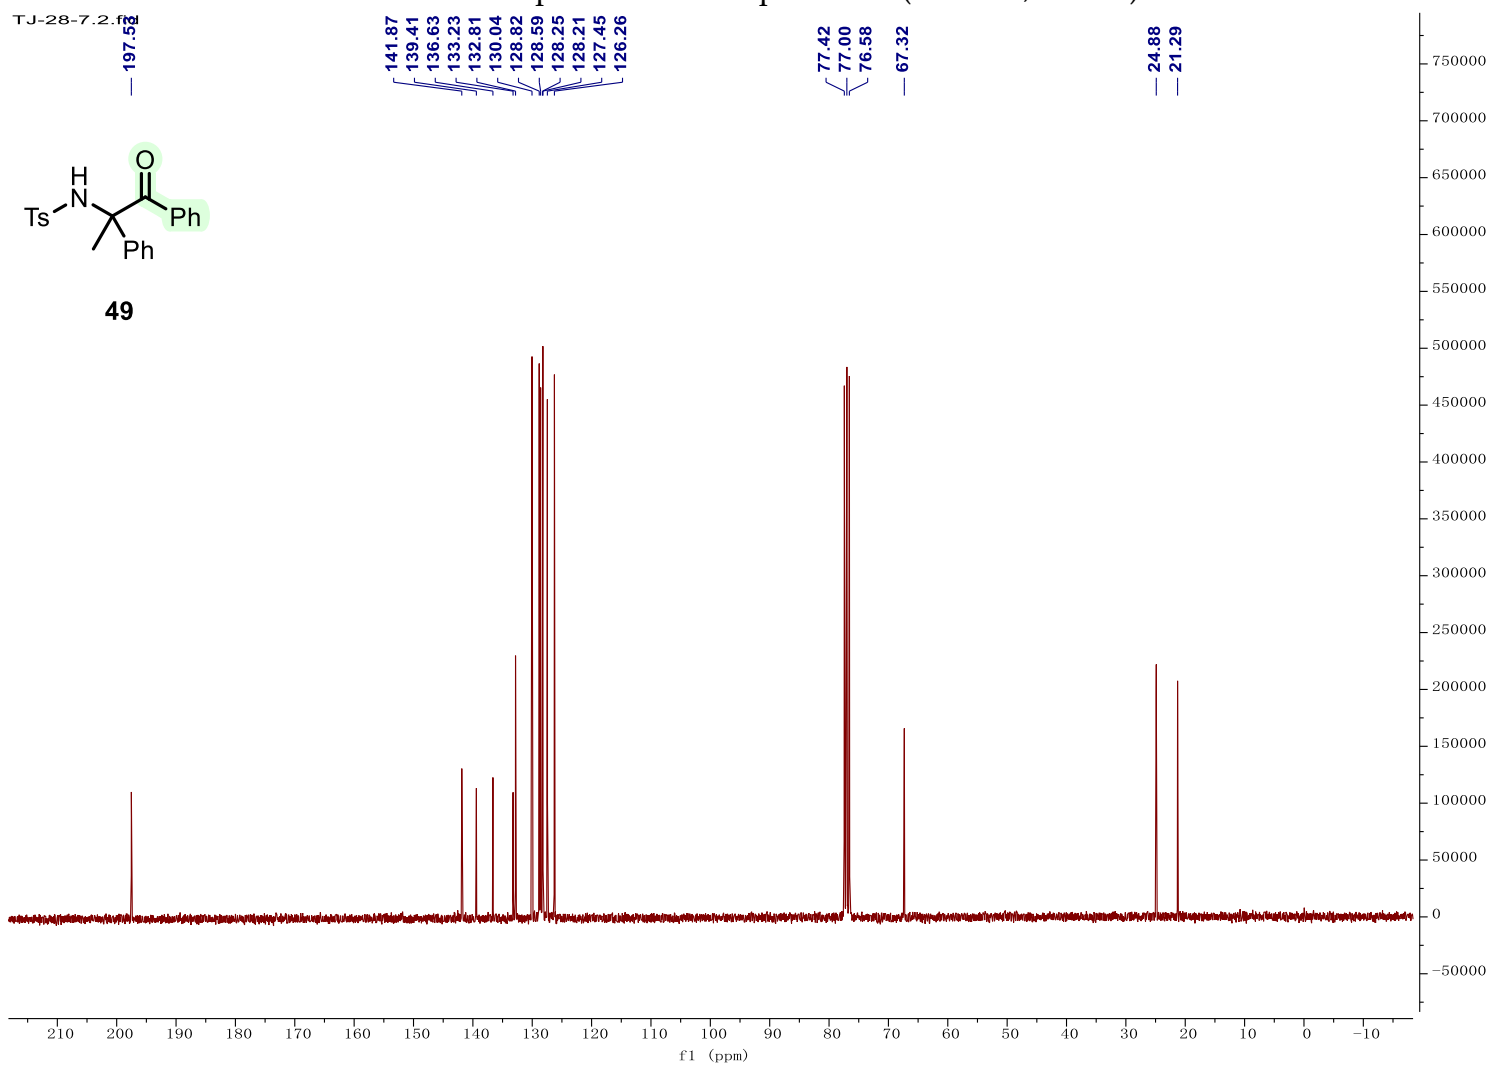

<sup>1</sup>H NMR spectrum of compound 50 (300 MHz, DMSO-d<sub>6</sub>)

TJ-28-9.8.fid

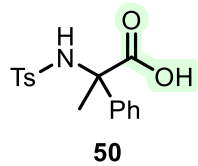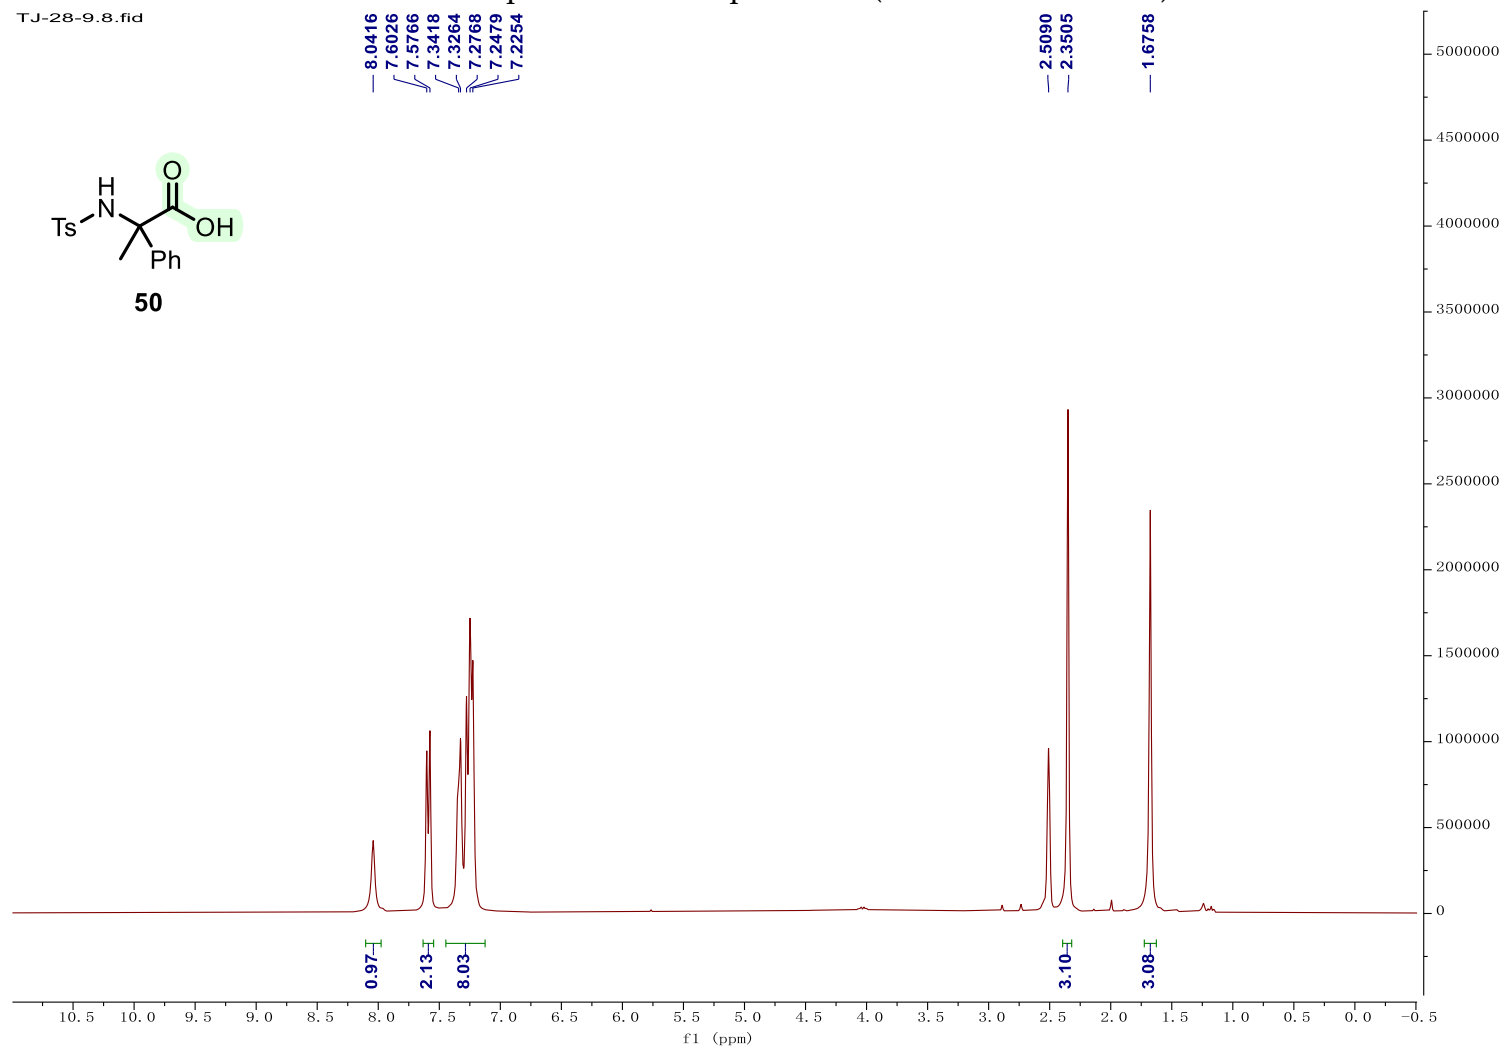

TJ-28-9.9.fid

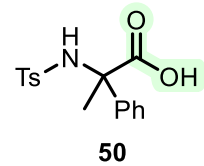

<sup>13</sup>C NMR spectrum of compound 50 (75 MHz, DMSO-d<sub>6</sub>)

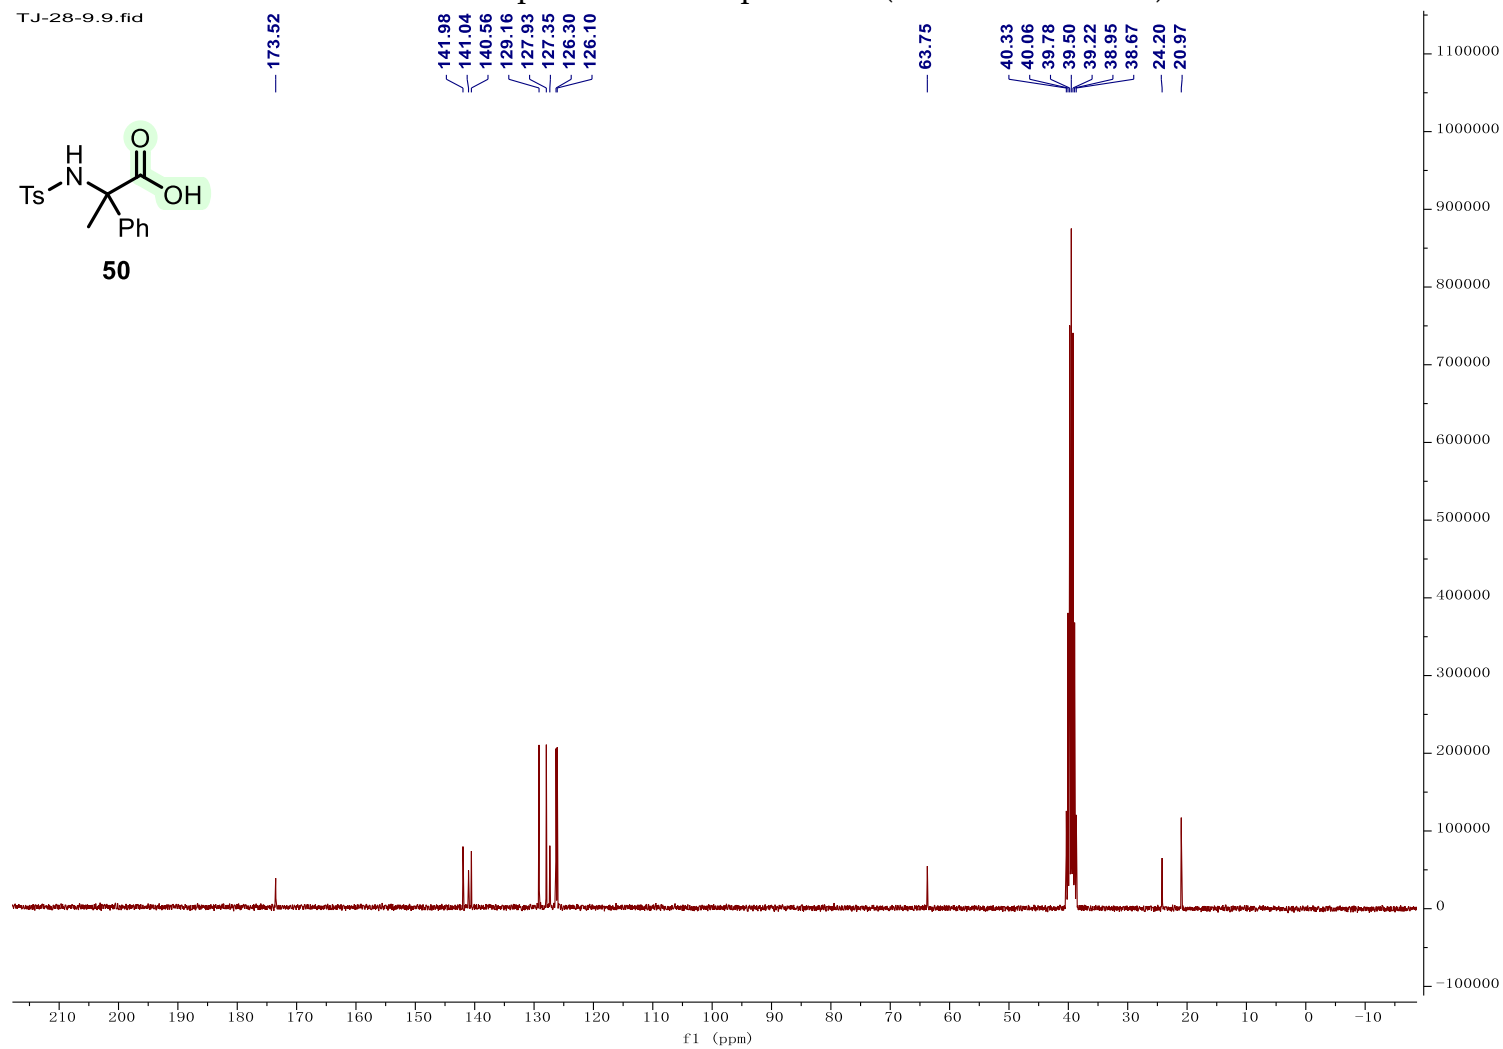

<sup>1</sup>H NMR spectrum of compound **51** (300 MHz, CDCl<sub>3</sub>)

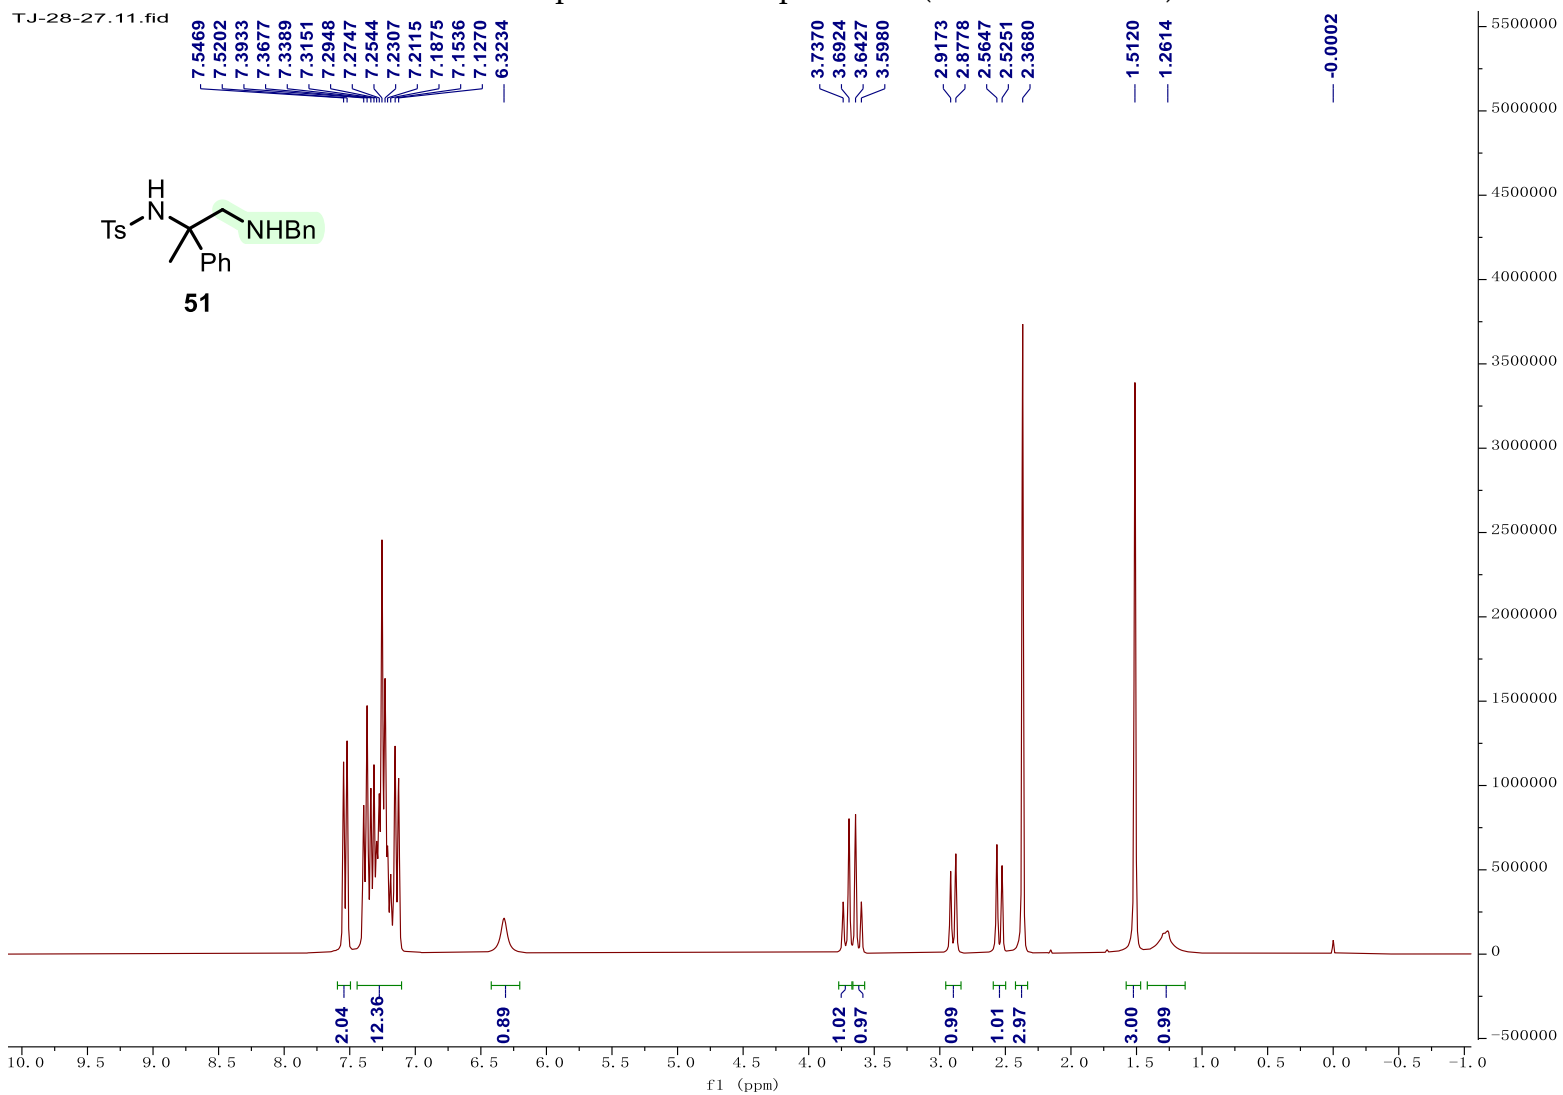

<sup>13</sup>C NMR spectrum of compound 51 (75 MHz, CDCl<sub>3</sub>)

TJ-28-27.12.fid

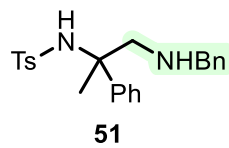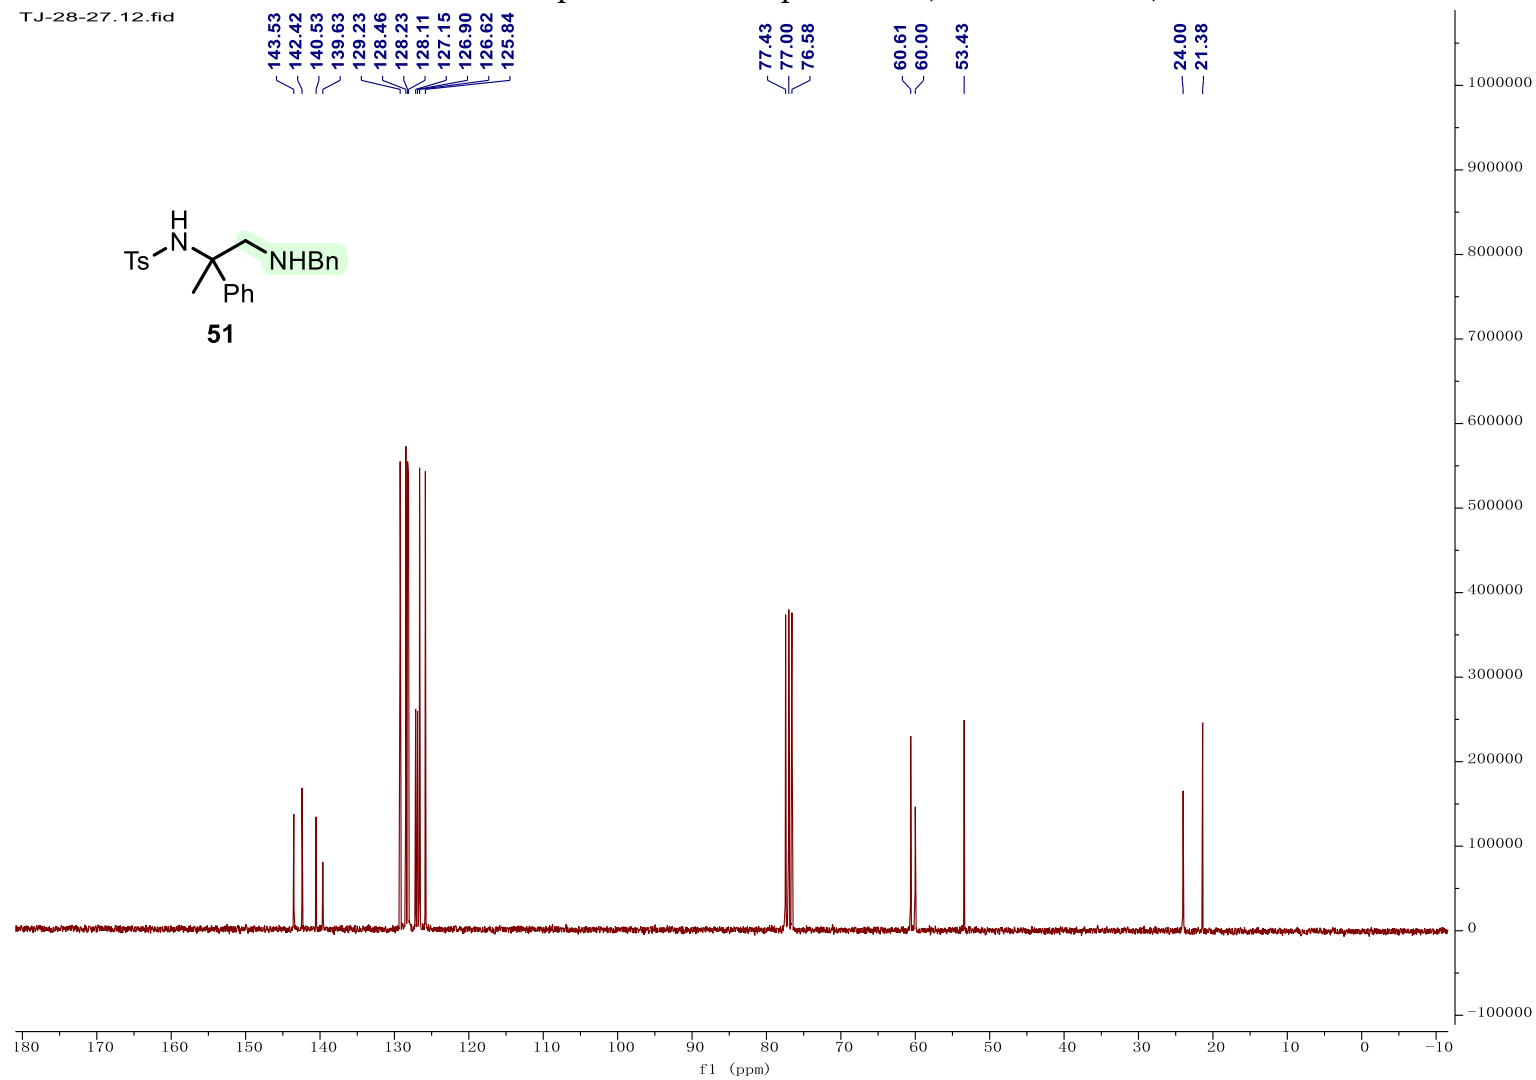

Supplement: d6gc01193d1.pdf [file d6gc01193d1.pdf]
